# Supplementary material for: GlobR2C2 (Global Recession Rates of Coastal Cliffs): a global relational database to investigate coastal rocky cliff erosion rate variations
Source: Copernicus journal article supplement (doi:10.5194/esurf-6-651-2018), 2018-08-09
Supplement: Supplementary file 1 [file esurf-6-651-2018-supplement.zip]

Archive with 2 entries (2 files):
- supplementary_GlobR2C2.xlsx
- esurf-6-651-2018-supplement-title-page.pdf
