# Supplementary material for: GlobR2C2 (Global Recession Rates of Coastal Cliffs): a global relational database to investigate coastal rocky cliff erosion rate variations
Source: Copernicus journal article supplement (doi:10.5194/esurf-6-651-2018), 2018-08-09
Supplement: Supplementary file 1 [file esurf-6-651-2018-supplement.zip › esurf-6-651-2018-supplement-title-page.pdf]

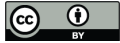

## *Supplement of*

# **GlobR2C2 (Global Recession Rates of Coastal Cliffs): a global relational database to investigate coastal rocky cliff erosion rate variations**

**M. Prémaillon et al.**

*Correspondence to:* Mélody Prémaillon ([melody.premaillon@get.omp.eu](mailto:melody.premaillon@get.omp.eu))

- [esurf-6-651-2018-supplement-title-page.pdf](#)
- [supplementary\\_GlobR2C2.xlsx](#)

The copyright of individual parts of the supplement might differ from the CC BY 4.0 License.
