# Supplementary material for: GlobR2C2 (Global Recession Rates of Coastal Cliffs): a global relational database to investigate coastal rocky cliff erosion rate variations
Source: Copernicus journal article supplement (doi:10.5194/esurf-6-651-2018), 2018-08-09
Supplement: Supplementary file 1 [file supplementary_GlobR2C2.xlsx]

## Sheet: Field description
Field description
Lines in white are raw data extracted from sources, lines in grey are computed from raw datas.
	Field description
Publication title	Title of the publication
Publication year	Year of publication
Journal	Journal title
DOI	Publication's DOI
Last name	Last name of first author
First name	First name of first author
Cliff name	Cliff name
Sea	Sea
Ocean	Ocean
Continent	Continent
Country	Country
cliff length [m]	Length of surveyed cliff
Lithology	Cliff lithology
Fracturation	Presence or absence/not mentioned of a fracturation
Weathering	Presence or absence/not mentioned of weathering
Notch presence	Presence or absence/not mentioned of a notch
Bedding	Presence or absence/not mentioned of a bedding
Height max [m]	Cliff maximum height
Min height [m]	Cliff minimum height
Mean height [m]	Cliff mean height
Computed mean height [m]	Cliff mean height computed from 8" global DEM GMTED 2010
Computed min height [m]	Cliff maximum height computed from 8" global DEM GMTED 2010
Computed max height [m]	Cliff minimum height computed from 8" global DEM GMTED 2010
Cliff direction [°N]	Cliff normal direction in degrees clockwise from north
Hoek & Brown term	Rock resistance Hoek and Brown term
Erosion rate [m/an]	Erosion rate
Retreat [m]	Retreat of cliff face
Eroded volume [m3]	Volume of erosion
Max erosion rate [m/an]	Minimum erosion rate
Min erosion rate [m/an]	Maximum erosion rate
Erosion rate (harmonised) [m/an]	Erosion rate in m/yr harmonised from fields: erosion rate, retreat, eroded volume, minimum and maximum erosion rate
Measure beginning	Date of measure beginning
Measure ending	Date of measure ending
Duration [yr]	Measure duration
Duration (harmonised) [yr]	Measure duration harmonised from fields: measure duration and measure beginning/ending
Measurement technique	Technique used to measure erosion
Mean swell height [m]	Mean swell significant height during 1979-2016 period from ERA-interim reanalysis dataset
Q95% swell height [m]	95% quantile of swell significant height during 1979-2016 period from ERA-interim reanalysis dataset
Standard deviation swell height [m]	Standard deviation of swell significant height during 1979-2016 period from ERA-interim reanalysis dataset
Mean swell period [s]	Mean swell period during 1979-2016 period from ERA-interim reanalysis dataset
Q95% swell period [s]	95% quantile of swell period during 1979-2016 period from ERA-interim reanalysis dataset
Standard deviation swell period [s]	Standard deviation of swell period during 1979-2016 period from ERA-interim reanalysis dataset
Wave energy flux [W]	Mean wave energy flux during 1979-2016 period
Storm duration [days]	Mean storm duration in days, during 1979-2016 period
Number of storms	Number of storms recorded during 1979-2016 period
Tidal range [m]	Mean tidal range computed over a 2 yrs-period using FES2012
Cumulated rainfalls [mm]	Mean annual cumulated rainfalls during 1961-1990 period from CRU reanalysis dataset
Frost day frequency	Mean number of frost days per year during 1961-1990 period from CRU reanalysis dataset
Mean temperature [°C]	Mean annual temperature during 1961-1990 period from CRU reanalysis dataset
Temperature amplitude [°C]	Mean annual temperature amplitude (difference between annual maximum and annual minimum) during 1961-1990 period from CRU reanalysis dataset

## Sheet: Database
Publication				Author		Cliff																		Geotechnical	Measure											Wave forcings									Tide	Climate forcings
Publication title	Publication year	Journal	DOI	Last name	First name	Cliff name	Sea	Ocean	Continent	Country	cliff length [m]	Lithology	Fracturation	Weathering	Notch presence	Bedding	Height max [m]	Min height [m]	Mean height [m]	Computed mean height [m]	Computed min height [m]	Computed max height [m]	Cliff direction [°N]	Hoek & Brown term	Erosion rate [m/an]	Retreat [m]	Eroded volume [m3]	Max erosion rate [m/an]	Min erosion rate [m/an]	Erosion rate (harmonised) [m/an]	Measure beginning	Measure ending	Duration [yr]	Duration (harmonised) [yr]	Measurement technique	Mean swell height [m]	Q95% swell height [m]	Standard deviation swell height [m]	Mean swell period [s]	Q95% swell period [s]	Standard deviation swell period [s]	Wave energy flux [W]	Storm duration [days]	Number of storms	Tidal range [m]	Cumulated rainfalls [mm]	Frost day frequency	Mean temperature [°C]	Temperature amplitude [°C]
Evolution of the clay-chalk silt cliffs in northern Boulonnais (Strouanne, Stangatte, France)	2004-06-01	Géomorphologie : relief, processus, environnement	10.3406/morfo.2004.1219	Pierre	Guillaume	Strouanne	English channel	Atlantic	Europe	France	64000	chalk	FALSE	FALSE	FALSE	FALSE	50	15	NA	25.3	50	25.3	227	weak	0.2	NA	NA	NA	NA	0.2	1939-04-20	2002-03-28	NA	62.98	aerial photography	0.749	1.74	0.499	4.381	6.001	0.936	2.41156	2	21.114	5.101	579	43.5	9.94167	12.9
Evolution of the clay-chalk silt cliffs in northern Boulonnais (Strouanne, Stangatte, France)	2004-06-01	Géomorphologie : relief, processus, environnement	10.3406/morfo.2004.1219	Pierre	Guillaume	Strouanne	English channel	Atlantic	Europe	France	64000	clay	FALSE	FALSE	FALSE	FALSE	50	15	NA	25.3	50	25.3	227	weak	0.2	NA	NA	NA	NA	0.2	1939-04-20	2002-03-28	NA	62.98	aerial photography	0.749	1.74	0.499	4.381	6.001	0.936	2.41156	2	21.114	5.101	579	43.5	9.94167	12.9
Evolution of the clay-chalk silt cliffs in northern Boulonnais (Strouanne, Stangatte, France)	2004-06-01	Géomorphologie : relief, processus, environnement	10.3406/morfo.2004.1219	Pierre	Guillaume	Stangatte	English channel	Atlantic	Europe	France	1000	chalk	FALSE	FALSE	FALSE	FALSE	28	14	NA	26.6	67	26.6	148	weak	0.29	NA	NA	NA	NA	0.29	1944-09-20	2002-03-28	58	58	aerial photography	0.749	1.74	0.499	4.381	6.001	0.936	2.41156	2	21.114	5.101	579	43.5	9.94167	12.9
Temporal and spatial variations of chalk cliff retreat in East Sussex, 1873 to 2001	2008-01-01	Marine Geology	10,1016/j.margeo.2007.12.005	Dornbusch	Uwe	Sussex	English channel	Atlantic	Europe	UK	2300	chalk	FALSE	FALSE	FALSE	FALSE	100	20	NA	33.5	153	33.5	148	weak	0.41	NA	NA	NA	NA	0.41	01/01/1873	01/01/1899	26	26	historic maps	1.264	2.952	0.835	6.101	8.658	1.397	9.56439	2.5	15.181	4.859	605	43.8	10.3	12
Temporal and spatial variations of chalk cliff retreat in East Sussex, 1873 to 2001	2008-01-01	Marine Geology	10,1016/j.margeo.2007.12.005	Dornbusch	Uwe	Sussex	English channel	Atlantic	Europe	UK	2300	chalk	FALSE	FALSE	FALSE	FALSE	100	20	NA	33.5	153	33.5	148	weak	0.31	NA	NA	NA	NA	0.31	01/01/1899	1910-01-01	11	11	historic maps	1.264	2.952	0.835	6.101	8.658	1.397	9.56439	2.5	15.181	4.859	605	43.8	10.3	12
Temporal and spatial variations of chalk cliff retreat in East Sussex, 1873 to 2001	2008-01-01	Marine Geology	10,1016/j.margeo.2007.12.005	Dornbusch	Uwe	Sussex	English channel	Atlantic	Europe	UK	2300	chalk	FALSE	FALSE	FALSE	FALSE	100	20	NA	33.5	153	33.5	148	weak	0.39	NA	NA	NA	NA	0.39	1910-01-01	1929-01-01	19	19	historic maps	1.264	2.952	0.835	6.101	8.658	1.397	9.56439	2.5	15.181	4.859	605	43.8	10.3	12
Temporal and spatial variations of chalk cliff retreat in East Sussex, 1873 to 2001	2008-01-01	Marine Geology	10,1016/j.margeo.2007.12.005	Dornbusch	Uwe	Sussex	English channel	Atlantic	Europe	UK	2300	chalk	FALSE	FALSE	FALSE	FALSE	100	20	NA	33.5	153	33.5	148	weak	0.37	NA	NA	NA	NA	0.37	01/01/1873	1929-01-01	56	56	historic maps	1.264	2.952	0.835	6.101	8.658	1.397	9.56439	2.5	15.181	4.859	605	43.8	10.3	12
Temporal and spatial variations of chalk cliff retreat in East Sussex, 1873 to 2001	2008-01-01	Marine Geology	10,1016/j.margeo.2007.12.005	Dornbusch	Uwe	Sussex	English channel	Atlantic	Europe	UK	2300	chalk	FALSE	FALSE	FALSE	FALSE	100	20	NA	33.5	153	33.5	148	weak	0.35	NA	NA	NA	NA	0.35	1929-01-01	1973-01-01	44	44	comparison historic maps / aerial photography	1.264	2.952	0.835	6.101	8.658	1.397	9.56439	2.5	15.181	4.859	605	43.8	10.3	12
Temporal and spatial variations of chalk cliff retreat in East Sussex, 1873 to 2001	2008-01-01	Marine Geology	10,1016/j.margeo.2007.12.005	Dornbusch	Uwe	Sussex	English channel	Atlantic	Europe	UK	2300	chalk	FALSE	FALSE	FALSE	FALSE	100	20	NA	33.5	153	33.5	148	weak	0.27	NA	NA	NA	NA	0.27	1973-01-01	2001-01-01	28	28	aerial photography	1.264	2.952	0.835	6.101	8.658	1.397	9.56439	2.5	15.181	4.859	605	43.8	10.3	12
Temporal and spatial variations of chalk cliff retreat in East Sussex, 1873 to 2001	2008-01-01	Marine Geology	10,1016/j.margeo.2007.12.005	Dornbusch	Uwe	Sussex	English channel	Atlantic	Europe	UK	2300	chalk	FALSE	FALSE	FALSE	FALSE	100	20	NA	33.5	153	33.5	148	weak	0.36	NA	NA	NA	NA	0.36	1973-01-01	1973-01-01	100	100	comparison historic maps / aerial photography	1.264	2.952	0.835	6.101	8.658	1.397	9.56439	2.5	15.181	4.859	605	43.8	10.3	12
Temporal and spatial variations of chalk cliff retreat in East Sussex, 1873 to 2001	2008-01-01	Marine Geology	10,1016/j.margeo.2007.12.005	Dornbusch	Uwe	Sussex	English channel	Atlantic	Europe	UK	2300	chalk	FALSE	FALSE	FALSE	FALSE	100	20	NA	33.5	153	33.5	148	weak	0.35	NA	NA	NA	NA	0.35	1973-01-01	2001-01-01	128	128	comparison historic maps / aerial photography	1.264	2.952	0.835	6.101	8.658	1.397	9.56439	2.5	15.181	4.859	605	43.8	10.3	12
Human interference on soft cliff retreat : examples from Christchurch Bay, UK	2011-01-01	Quarterly Journal of Engineering Geology and Hydrogeology	10.1144/qjegh2011-069	Brown	Sally	Mudeford	English channel	Atlantic	Europe	UK	2900	gravel	FALSE	FALSE	FALSE	FALSE	NA	NA	36	13	31	13	76	weak	0.2	NA	NA	NA	NA	0.2	01/01/1872	1932-01-01	NA	60.04	aerial photography	1.391	3.094	0.852	6.483	9.187	1.468	12.3081	2.625	14.807	1.195	644	62	9.88333	11.7
Human interference on soft cliff retreat : examples from Christchurch Bay, UK	2011-01-01	Quarterly Journal of Engineering Geology and Hydrogeology	10.1144/qjegh2011-069	Brown	Sally	Mudeford	English channel	Atlantic	Europe	UK	2900	gravel	FALSE	FALSE	FALSE	FALSE	NA	NA	36	13	31	13	76	weak	0.1	NA	NA	NA	NA	0.1	1932-01-01	1963-01-01	NA	31.02	aerial photography	1.391	3.094	0.852	6.483	9.187	1.468	12.3081	2.625	14.807	1.195	644	62	9.88333	11.7
Human interference on soft cliff retreat : examples from Christchurch Bay, UK	2011-01-01	Quarterly Journal of Engineering Geology and Hydrogeology	10.1144/qjegh2011-069	Brown	Sally	Mudeford	English channel	Atlantic	Europe	UK	2900	gravel	FALSE	FALSE	FALSE	FALSE	NA	NA	36	13	31	13	76	weak	0.2	NA	NA	NA	NA	0.2	1963-01-01	2005-01-01	NA	42.03	aerial photography	1.391	3.094	0.852	6.483	9.187	1.468	12.3081	2.625	14.807	1.195	644	62	9.88333	11.7
Human interference on soft cliff retreat : examples from Christchurch Bay, UK	2011-01-01	Quarterly Journal of Engineering Geology and Hydrogeology	10.1144/qjegh2011-069	Brown	Sally	Mudeford	English channel	Atlantic	Europe	UK	2900	gravel	FALSE	FALSE	FALSE	FALSE	NA	NA	36	13	31	13	76	weak	0.2	NA	NA	NA	NA	0.2	1972-01-01	2005-01-01	NA	33.02	aerial photography	1.391	3.094	0.852	6.483	9.187	1.468	12.3081	2.625	14.807	1.195	644	62	9.88333	11.7
Human interference on soft cliff retreat : examples from Christchurch Bay, UK	2011-01-01	Quarterly Journal of Engineering Geology and Hydrogeology	10.1144/qjegh2011-069	Brown	Sally	Mudeford	English channel	Atlantic	Europe	UK	2900	sand, clay	FALSE	FALSE	FALSE	FALSE	NA	NA	36	13	31	13	76	weak	0.2	NA	NA	NA	NA	0.2	01/01/1872	1932-01-01	NA	60.04	aerial photography	1.391	3.094	0.852	6.483	9.187	1.468	12.3081	2.625	14.807	1.195	644	62	9.88333	11.7
Human interference on soft cliff retreat : examples from Christchurch Bay, UK	2011-01-01	Quarterly Journal of Engineering Geology and Hydrogeology	10.1144/qjegh2011-069	Brown	Sally	Mudeford	English channel	Atlantic	Europe	UK	2900	sand, clay	FALSE	FALSE	FALSE	FALSE	NA	NA	36	13	31	13	76	weak	0.1	NA	NA	NA	NA	0.1	1932-01-01	1963-01-01	NA	31.02	aerial photography	1.391	3.094	0.852	6.483	9.187	1.468	12.3081	2.625	14.807	1.195	644	62	9.88333	11.7
Human interference on soft cliff retreat : examples from Christchurch Bay, UK	2011-01-01	Quarterly Journal of Engineering Geology and Hydrogeology	10.1144/qjegh2011-069	Brown	Sally	Mudeford	English channel	Atlantic	Europe	UK	2900	sand, clay	FALSE	FALSE	FALSE	FALSE	NA	NA	36	13	31	13	76	weak	0.2	NA	NA	NA	NA	0.2	1963-01-01	2005-01-01	NA	42.03	aerial photography	1.391	3.094	0.852	6.483	9.187	1.468	12.3081	2.625	14.807	1.195	644	62	9.88333	11.7
Human interference on soft cliff retreat : examples from Christchurch Bay, UK	2011-01-01	Quarterly Journal of Engineering Geology and Hydrogeology	10.1144/qjegh2011-069	Brown	Sally	Mudeford	English channel	Atlantic	Europe	UK	2900	sand, clay	FALSE	FALSE	FALSE	FALSE	NA	NA	36	13	31	13	76	weak	0.2	NA	NA	NA	NA	0.2	1972-01-01	2005-01-01	NA	33.02	aerial photography	1.391	3.094	0.852	6.483	9.187	1.468	12.3081	2.625	14.807	1.195	644	62	9.88333	11.7
Human interference on soft cliff retreat : examples from Christchurch Bay, UK	2011-01-01	Quarterly Journal of Engineering Geology and Hydrogeology	10.1144/qjegh2011-069	Brown	Sally	Becton Bunny	English channel	Atlantic	Europe	UK	4200	gravel	FALSE	FALSE	FALSE	FALSE	NA	NA	36	11.7	25	11.7	102	weak	0.4	NA	NA	NA	NA	0.4	1932-01-01	1972-01-01	NA	40.03	aerial photography	1.391	3.094	0.852	6.483	9.187	1.468	12.3081	2.625	14.807	1.202	644	62	9.88333	11.7
Human interference on soft cliff retreat : examples from Christchurch Bay, UK	2011-01-01	Quarterly Journal of Engineering Geology and Hydrogeology	10.1144/qjegh2011-069	Brown	Sally	Becton Bunny	English channel	Atlantic	Europe	UK	4200	gravel	FALSE	FALSE	FALSE	FALSE	NA	NA	36	11.7	25	11.7	102	weak	0.2	NA	NA	NA	NA	0.2	01/01/1832	1963-01-01	NA	131.09	aerial photography	1.391	3.094	0.852	6.483	9.187	1.468	12.3081	2.625	14.807	1.202	644	62	9.88333	11.7
Human interference on soft cliff retreat : examples from Christchurch Bay, UK	2011-01-01	Quarterly Journal of Engineering Geology and Hydrogeology	10.1144/qjegh2011-069	Brown	Sally	Becton Bunny	English channel	Atlantic	Europe	UK	4200	gravel	FALSE	FALSE	FALSE	FALSE	NA	NA	36	11.7	25	11.7	102	weak	0.3	NA	NA	NA	NA	0.3	1963-01-01	2005-01-01	NA	42.03	aerial photography	1.391	3.094	0.852	6.483	9.187	1.468	12.3081	2.625	14.807	1.202	644	62	9.88333	11.7
Human interference on soft cliff retreat : examples from Christchurch Bay, UK	2011-01-01	Quarterly Journal of Engineering Geology and Hydrogeology	10.1144/qjegh2011-069	Brown	Sally	Becton Bunny	English channel	Atlantic	Europe	UK	4200	gravel	FALSE	FALSE	FALSE	FALSE	NA	NA	36	11.7	25	11.7	102	weak	0.3	NA	NA	NA	NA	0.3	01/01/1872	2005-01-01	NA	133.09	aerial photography	1.391	3.094	0.852	6.483	9.187	1.468	12.3081	2.625	14.807	1.202	644	62	9.88333	11.7
Human interference on soft cliff retreat : examples from Christchurch Bay, UK	2011-01-01	Quarterly Journal of Engineering Geology and Hydrogeology	10.1144/qjegh2011-069	Brown	Sally	Becton Bunny	English channel	Atlantic	Europe	UK	4200	sand, clay	FALSE	FALSE	FALSE	FALSE	NA	NA	36	11.7	25	11.7	102	weak	0.4	NA	NA	NA	NA	0.4	1932-01-01	1972-01-01	NA	40.03	aerial photography	1.391	3.094	0.852	6.483	9.187	1.468	12.3081	2.625	14.807	1.202	644	62	9.88333	11.7
Human interference on soft cliff retreat : examples from Christchurch Bay, UK	2011-01-01	Quarterly Journal of Engineering Geology and Hydrogeology	10.1144/qjegh2011-069	Brown	Sally	Becton Bunny	English channel	Atlantic	Europe	UK	4200	sand, clay	FALSE	FALSE	FALSE	FALSE	NA	NA	36	11.7	25	11.7	102	weak	0.2	NA	NA	NA	NA	0.2	01/01/1832	1963-01-01	NA	131.09	aerial photography	1.391	3.094	0.852	6.483	9.187	1.468	12.3081	2.625	14.807	1.202	644	62	9.88333	11.7
Human interference on soft cliff retreat : examples from Christchurch Bay, UK	2011-01-01	Quarterly Journal of Engineering Geology and Hydrogeology	10.1144/qjegh2011-069	Brown	Sally	Becton Bunny	English channel	Atlantic	Europe	UK	4200	sand, clay	FALSE	FALSE	FALSE	FALSE	NA	NA	36	11.7	25	11.7	102	weak	0.3	NA	NA	NA	NA	0.3	1963-01-01	2005-01-01	NA	42.03	aerial photography	1.391	3.094	0.852	6.483	9.187	1.468	12.3081	2.625	14.807	1.202	644	62	9.88333	11.7
Human interference on soft cliff retreat : examples from Christchurch Bay, UK	2011-01-01	Quarterly Journal of Engineering Geology and Hydrogeology	10.1144/qjegh2011-069	Brown	Sally	Becton Bunny	English channel	Atlantic	Europe	UK	4200	sand, clay	FALSE	FALSE	FALSE	FALSE	NA	NA	36	11.7	25	11.7	102	weak	0.3	NA	NA	NA	NA	0.3	01/01/1872	2005-01-01	NA	133.09	aerial photography	1.391	3.094	0.852	6.483	9.187	1.468	12.3081	2.625	14.807	1.202	644	62	9.88333	11.7
Human interference on soft cliff retreat : examples from Christchurch Bay, UK	2011-01-01	Quarterly Journal of Engineering Geology and Hydrogeology	10.1144/qjegh2011-069	Brown	Sally	Chewton Bunny	English channel	Atlantic	Europe	UK	3400	gravel	FALSE	FALSE	FALSE	FALSE	NA	NA	36	21.9	35	21.9	95	weak	1	NA	NA	NA	NA	1	1932-01-01	1972-01-01	NA	40.03	aerial photography	1.391	3.094	0.852	6.483	9.187	1.468	12.3081	2.625	14.807	1.202	644	62	9.88333	11.7
Human interference on soft cliff retreat : examples from Christchurch Bay, UK	2011-01-01	Quarterly Journal of Engineering Geology and Hydrogeology	10.1144/qjegh2011-069	Brown	Sally	Chewton Bunny	English channel	Atlantic	Europe	UK	3400	gravel	FALSE	FALSE	FALSE	FALSE	NA	NA	36	21.9	35	21.9	95	weak	0.5	NA	NA	NA	NA	0.5	1932-01-01	1963-01-01	NA	31.02	aerial photography	1.391	3.094	0.852	6.483	9.187	1.468	12.3081	2.625	14.807	1.202	644	62	9.88333	11.7
Human interference on soft cliff retreat : examples from Christchurch Bay, UK	2011-01-01	Quarterly Journal of Engineering Geology and Hydrogeology	10.1144/qjegh2011-069	Brown	Sally	Chewton Bunny	English channel	Atlantic	Europe	UK	3400	gravel	FALSE	FALSE	FALSE	FALSE	NA	NA	36	21.9	35	21.9	95	weak	0.8	NA	NA	NA	NA	0.8	1963-01-01	2005-01-01	NA	42.03	aerial photography	1.391	3.094	0.852	6.483	9.187	1.468	12.3081	2.625	14.807	1.202	644	62	9.88333	11.7
Human interference on soft cliff retreat : examples from Christchurch Bay, UK	2011-01-01	Quarterly Journal of Engineering Geology and Hydrogeology	10.1144/qjegh2011-069	Brown	Sally	Chewton Bunny	English channel	Atlantic	Europe	UK	3400	gravel	FALSE	FALSE	FALSE	FALSE	NA	NA	36	21.9	35	21.9	95	weak	0.8	NA	NA	NA	NA	0.8	1972-01-01	2005-01-01	NA	33.02	aerial photography	1.391	3.094	0.852	6.483	9.187	1.468	12.3081	2.625	14.807	1.202	644	62	9.88333	11.7
Human interference on soft cliff retreat : examples from Christchurch Bay, UK	2011-01-01	Quarterly Journal of Engineering Geology and Hydrogeology	10.1144/qjegh2011-069	Brown	Sally	Chewton Bunny	English channel	Atlantic	Europe	UK	3400	sand, clay	FALSE	FALSE	FALSE	FALSE	NA	NA	36	21.9	35	21.9	95	weak	1	NA	NA	NA	NA	1	1932-01-01	1972-01-01	NA	40.03	aerial photography	1.391	3.094	0.852	6.483	9.187	1.468	12.3081	2.625	14.807	1.202	644	62	9.88333	11.7
Human interference on soft cliff retreat : examples from Christchurch Bay, UK	2011-01-01	Quarterly Journal of Engineering Geology and Hydrogeology	10.1144/qjegh2011-069	Brown	Sally	Chewton Bunny	English channel	Atlantic	Europe	UK	3400	sand, clay	FALSE	FALSE	FALSE	FALSE	NA	NA	36	21.9	35	21.9	95	weak	0.5	NA	NA	NA	NA	0.5	1932-01-01	1963-01-01	NA	31.02	aerial photography	1.391	3.094	0.852	6.483	9.187	1.468	12.3081	2.625	14.807	1.202	644	62	9.88333	11.7
Human interference on soft cliff retreat : examples from Christchurch Bay, UK	2011-01-01	Quarterly Journal of Engineering Geology and Hydrogeology	10.1144/qjegh2011-069	Brown	Sally	Chewton Bunny	English channel	Atlantic	Europe	UK	3400	sand, clay	FALSE	FALSE	FALSE	FALSE	NA	NA	36	21.9	35	21.9	95	weak	0.8	NA	NA	NA	NA	0.8	1963-01-01	2005-01-01	NA	42.03	aerial photography	1.391	3.094	0.852	6.483	9.187	1.468	12.3081	2.625	14.807	1.202	644	62	9.88333	11.7
Human interference on soft cliff retreat : examples from Christchurch Bay, UK	2011-01-01	Quarterly Journal of Engineering Geology and Hydrogeology	10.1144/qjegh2011-069	Brown	Sally	Chewton Bunny	English channel	Atlantic	Europe	UK	3400	sand, clay	FALSE	FALSE	FALSE	FALSE	NA	NA	36	21.9	35	21.9	95	weak	0.8	NA	NA	NA	NA	0.8	1972-01-01	2005-01-01	NA	33.02	aerial photography	1.391	3.094	0.852	6.483	9.187	1.468	12.3081	2.625	14.807	1.202	644	62	9.88333	11.7
Quantification of the Normandy and Picardy chalk cliff retreat by photogrammetric analysis	2004-01-01	NA	10.1144/GSL.ENG.2004.020.01.11	Costa	Stéphane	Fecan - Senneville	English channel	Atlantic	Europe	France	3323	chalk	FALSE	FALSE	FALSE	FALSE	NA	NA	NA	77.5	122	77.5	252	weak	0.12	3.45	NA	NA	NA	0.12	1966-01-01	1995-01-01	NA	29.02	aerial photography (orthorectified)	1.264	2.952	0.835	6.101	8.658	1.397	9.56439	2.5	15.181	5.328	571	28.9	10.725	12.3
Quantification of the Normandy and Picardy chalk cliff retreat by photogrammetric analysis	2004-01-01	NA	10.1144/GSL.ENG.2004.020.01.11	Costa	Stéphane	Senneville - Saint Pierre en Port	English channel	Atlantic	Europe	France	6970	chalk	FALSE	FALSE	FALSE	FALSE	NA	NA	NA	70.9	106	70.9	250	weak	0.27	7.7	NA	NA	NA	0.27	1966-01-01	1995-01-01	NA	29.02	aerial photography (orthorectified)	1.264	2.952	0.835	6.101	8.658	1.397	9.56439	2.5	15.181	5.598	571	28.9	10.725	12.3
Quantification of the Normandy and Picardy chalk cliff retreat by photogrammetric analysis	2004-01-01	NA	10.1144/GSL.ENG.2004.020.01.11	Costa	Stéphane	Saint Pierre en Port - Veulettes sur mer	English channel	Atlantic	Europe	France	8831	chalk	FALSE	FALSE	FALSE	FALSE	NA	NA	NA	54.6	87	54.6	248	weak	0.17	4.9	NA	NA	NA	0.17	1966-01-01	1995-01-01	NA	29.02	aerial photography (orthorectified)	1.264	2.952	0.835	6.101	8.658	1.397	9.56439	2.5	15.181	5.779	593	31.9	10.4583	12.7
Quantification of the Normandy and Picardy chalk cliff retreat by photogrammetric analysis	2004-01-01	NA	10.1144/GSL.ENG.2004.020.01.11	Costa	Stéphane	Veullettes sur mer - Centrale EDF de Paluel	English channel	Atlantic	Europe	France	2868	chalk	FALSE	FALSE	FALSE	FALSE	NA	NA	NA	45.4	67	45.4	257	weak	0.14	4	NA	NA	NA	0.14	1966-01-01	1995-01-01	NA	29.02	aerial photography (orthorectified)	1.264	2.952	0.835	6.101	8.658	1.397	9.56439	2.5	15.181	5.779	593	31.9	10.4583	12.7
Quantification of the Normandy and Picardy chalk cliff retreat by photogrammetric analysis	2004-01-01	NA	10.1144/GSL.ENG.2004.020.01.11	Costa	Stéphane	Centrale EDF de Paluel - Saint Valery en Caux	English channel	Atlantic	Europe	France	5623	chalk	FALSE	FALSE	FALSE	FALSE	NA	NA	NA	48.8	77	48.8	261	weak	0.24	7	NA	NA	NA	0.24	1966-01-01	1995-01-01	NA	29.02	aerial photography (orthorectified)	1.264	2.952	0.835	6.101	8.658	1.397	9.56439	2.5	15.181	5.779	593	31.9	10.4583	12.7
Quantification of the Normandy and Picardy chalk cliff retreat by photogrammetric analysis	2004-01-01	NA	10.1144/GSL.ENG.2004.020.01.11	Costa	Stéphane	Dieppe - Puys	English channel	Atlantic	Europe	France	1361	chalk	FALSE	FALSE	FALSE	FALSE	NA	NA	NA	47	67	47	258	weak	0.18	5.1	NA	NA	NA	0.18	1966-01-01	1995-01-01	NA	29.02	aerial photography (orthorectified)	1.264	2.952	0.835	6.101	8.658	1.397	9.56439	2.5	15.181	6.429	602	33.1	10.3167	13.2
Quantification of the Normandy and Picardy chalk cliff retreat by photogrammetric analysis	2004-01-01	NA	10.1144/GSL.ENG.2004.020.01.11	Costa	Stéphane	Puys - Penly	English channel	Atlantic	Europe	France	9592	chalk	FALSE	FALSE	FALSE	FALSE	NA	NA	NA	60.5	101	60.5	250	weak	0.17	4.8	NA	NA	NA	0.17	1966-01-01	1995-01-01	NA	29.02	aerial photography (orthorectified)	1.264	2.952	0.835	6.101	8.658	1.397	9.56439	2.5	15.181	6.429	602	33.1	10.3167	13.2
Quantification of the Normandy and Picardy chalk cliff retreat by photogrammetric analysis	2004-01-01	NA	10.1144/GSL.ENG.2004.020.01.11	Costa	Stéphane	Penly - Criel	English channel	Atlantic	Europe	France	7663	chalk	FALSE	FALSE	FALSE	FALSE	NA	NA	NA	65.7	114	65.7	240	weak	0.28	8.1	NA	NA	NA	0.28	1966-01-01	1995-01-01	NA	29.02	aerial photography (orthorectified)	1.264	2.952	0.835	6.101	8.658	1.397	9.56439	2.5	15.181	6.429	616	44.2	10.325	13.6
Quantification of the Normandy and Picardy chalk cliff retreat by photogrammetric analysis	2004-01-01	NA	10.1144/GSL.ENG.2004.020.01.11	Costa	Stéphane	Criel - Le Treport	English channel	Atlantic	Europe	France	5430	chalk	FALSE	FALSE	FALSE	FALSE	NA	NA	NA	61.3	99	61.3	248	weak	0.14	3.9	NA	NA	NA	0.14	1966-01-01	1995-01-01	NA	29.02	aerial photography (orthorectified)	1.264	2.952	0.835	6.101	8.658	1.397	9.56439	2.5	15.181	6.69	616	44.2	10.325	13.6
The relationship between incident wave energy and seacliff erosion rates: San Diego County, California	2000-01-01	Journal of Coastal Research	NA	Benumof	Benjamin T.	Carlsbad	NA	Pacific	America	USA	NA	sand	FALSE	TRUE	FALSE	FALSE	115	5	NA	5.5	9	5.5	151	weak	0.43	NA	NA	NA	NA	0.43	1932-01-01	1994-01-01	NA	62.04	aerial photography (orthorectified)	1.266	1.887	0.338	10.304	12.628	1.39	16.2045	2.75	12.989	1.215	287	14.7	16.5917	11.6
The relationship between incident wave energy and seacliff erosion rates: San Diego County, California	2000-01-01	Journal of Coastal Research	NA	Benumof	Benjamin T.	Encinitas	NA	Pacific	America	USA	NA	sandstone	FALSE	TRUE	FALSE	FALSE	115	5	NA	6.5	11	6.5	151	strong	0.08	NA	NA	NA	NA	0.08	1932-01-01	1994-01-01	NA	62.04	aerial photography (orthorectified)	1.266	1.887	0.338	10.304	12.628	1.39	16.2045	2.75	12.989	1.212	287	14.7	16.5917	11.6
The relationship between incident wave energy and seacliff erosion rates: San Diego County, California	2000-01-01	Journal of Coastal Research	NA	Benumof	Benjamin T.	Cardiff	NA	Pacific	America	USA	NA	claystone	FALSE	TRUE	FALSE	FALSE	115	5	NA	6	6	6	151	medium	0.13	NA	NA	NA	NA	0.13	1932-01-01	1994-01-01	NA	62.04	aerial photography (orthorectified)	1.266	1.887	0.338	10.304	12.628	1.39	16.2045	2.75	12.989	1.212	287	14.7	16.5917	11.6
The relationship between incident wave energy and seacliff erosion rates: San Diego County, California	2000-01-01	Journal of Coastal Research	NA	Benumof	Benjamin T.	Solana	NA	Pacific	America	USA	NA	sandstone	FALSE	TRUE	FALSE	FALSE	115	5	NA	-999	-999	-999	151	strong	0.08	NA	NA	NA	NA	0.08	1932-01-01	1994-01-01	NA	62.04	aerial photography (orthorectified)	1.266	1.887	0.338	10.304	12.628	1.39	16.2045	2.75	12.989	1.212	200	4.2	17.3667	8.8
The relationship between incident wave energy and seacliff erosion rates: San Diego County, California	2000-01-01	Journal of Coastal Research	NA	Benumof	Benjamin T.	Torrey Pines	NA	Pacific	America	USA	NA	shale	FALSE	TRUE	FALSE	FALSE	115	5	NA	17.3	22	17.3	151	strong	0.17	NA	NA	NA	NA	0.17	1932-01-01	1994-01-01	NA	62.04	aerial photography (orthorectified)	1.266	1.887	0.338	10.304	12.628	1.39	16.2045	2.75	12.989	1.221	200	4.2	17.3667	8.8
The relationship between incident wave energy and seacliff erosion rates: San Diego County, California	2000-01-01	Journal of Coastal Research	NA	Benumof	Benjamin T.	La Jolia	NA	Pacific	America	USA	NA	sandstone	FALSE	TRUE	FALSE	FALSE	115	5	NA	7	10	7	151	strong	0.03	NA	NA	NA	NA	0.03	1932-01-01	1994-01-01	NA	62.04	aerial photography (orthorectified)	1.266	1.887	0.338	10.304	12.628	1.39	16.2045	2.75	12.989	1.221	200	4.2	17.3667	8.8
The relationship between incident wave energy and seacliff erosion rates: San Diego County, California	2000-01-01	Journal of Coastal Research	NA	Benumof	Benjamin T.	La Jolia	NA	Pacific	America	USA	NA	shale	FALSE	TRUE	FALSE	FALSE	115	5	NA	7	10	7	151	strong	0.03	NA	NA	NA	NA	0.03	1932-01-01	1994-01-01	NA	62.04	aerial photography (orthorectified)	1.266	1.887	0.338	10.304	12.628	1.39	16.2045	2.75	12.989	1.221	200	4.2	17.3667	8.8
The relationship between incident wave energy and seacliff erosion rates: San Diego County, California	2000-01-01	Journal of Coastal Research	NA	Benumof	Benjamin T.	Sunset	NA	Pacific	America	USA	NA	sandstone	FALSE	TRUE	FALSE	FALSE	115	5	NA	-999	-999	-999	151	strong	0.08	NA	NA	NA	NA	0.08	1932-01-01	1994-01-01	NA	62.04	aerial photography (orthorectified)	1.266	1.887	0.338	10.304	12.628	1.39	16.2045	2.75	12.989	1.306	200	4.2	17.3667	8.8
The relationship between incident wave energy and seacliff erosion rates: San Diego County, California	2000-01-01	Journal of Coastal Research	NA	Benumof	Benjamin T.	Sunset	NA	Pacific	America	USA	NA	shale	FALSE	TRUE	FALSE	FALSE	115	5	NA	-999	-999	-999	151	strong	0.08	NA	NA	NA	NA	0.08	1932-01-01	1994-01-01	NA	62.04	aerial photography (orthorectified)	1.266	1.887	0.338	10.304	12.628	1.39	16.2045	2.75	12.989	1.306	200	4.2	17.3667	8.8
Erosional processes in the hard rock coastal cliffs at Staithes, North Yorkshire	2010-01-01	Geomorphology	10.1016/j.geomorph.2009.02.011	Lim	Michael	Site1	North sea	Atlantic	NA	UK	85	mudstone	FALSE	FALSE	FALSE	FALSE	NA	NA	71	45.8	74	45.8	282	strong	0.01	NA	NA	NA	NA	0.01	2003-10-01	2004-04-01	NA	0.5	Terrestrial digital photogrammetry / TLS	1.583	3.359	0.921	6.233	8.81	1.43	15.3257	2.5	17.613	3.434	631	71.1	8.38333	11.7
Erosional processes in the hard rock coastal cliffs at Staithes, North Yorkshire	2010-01-01	Geomorphology	10.1016/j.geomorph.2009.02.011	Lim	Michael	Site2	North sea	Atlantic	Europe	UK	85	mudstone	FALSE	FALSE	FALSE	FALSE	NA	NA	64	59.2	67	59.2	276	strong	0.08	NA	NA	NA	NA	0.08	2003-10-01	2004-04-01	NA	0.5	Terrestrial digital photogrammetry / TLS	1.583	3.359	0.921	6.233	8.81	1.43	15.3257	2.5	17.613	3.434	631	71.1	8.38333	11.7
Erosional processes in the hard rock coastal cliffs at Staithes, North Yorkshire	2010-01-01	Geomorphology	10.1016/j.geomorph.2009.02.011	Lim	Michael	Site3	NA	Atlantic	Europe	UK	66	mudstone	FALSE	FALSE	FALSE	FALSE	NA	NA	50	42.6	52	42.6	272	strong	0.07	NA	NA	NA	NA	0.07	2003-10-01	2004-04-01	NA	0.5	Terrestrial digital photogrammetry / TLS	1.583	3.359	0.921	6.233	8.81	1.43	15.3257	2.5	17.613	3.432	631	71.1	8.38333	11.7
Erosional processes in the hard rock coastal cliffs at Staithes, North Yorkshire	2010-01-01	Geomorphology	10.1016/j.geomorph.2009.02.011	Lim	Michael	Site4	North sea	Atlantic	Europe	UK	104	mudstone	FALSE	FALSE	FALSE	FALSE	NA	NA	46	31	44	31	248	strong	0.07	NA	NA	NA	NA	0.07	2003-10-01	2004-04-01	NA	0.5	Terrestrial digital photogrammetry / TLS	1.583	3.359	0.921	6.233	8.81	1.43	15.3257	2.5	17.613	3.432	631	71.1	8.38333	11.7
Erosional processes in the hard rock coastal cliffs at Staithes, North Yorkshire	2010-01-01	Geomorphology	10.1016/j.geomorph.2009.02.011	Lim	Michael	site5	North sea	Atlantic	Europe	UK	142	shale	FALSE	FALSE	FALSE	FALSE	NA	NA	35	24.2	49	24.2	249	medium	0.13	NA	NA	NA	NA	0.13	2003-10-01	2004-04-01	NA	0.5	Terrestrial digital photogrammetry / TLS	1.583	3.359	0.921	6.233	8.81	1.43	15.3257	2.5	17.613	3.432	631	71.1	8.38333	11.7
Le recul des falaises crayeuses du Pays de Caux : détermination des processus d'érosion et quantification des rythmes d'évolution / Retreat of chalk cliffs in the Pays de Caux: processes and rates	2002-01-01	Géomorphologie : relief, processus, environnement	10.3406/morfo.2002.1132	Henaff	Alain	Pays de Caux	English channel	Atlantic	Europe	France	13000	chalk	FALSE	FALSE	FALSE	FALSE	NA	NA	NA	71.8	122	71.8	249	weak	0.06	NA	NA	NA	NA	0.06	01/01/1824	1986-01-01	NA	162.11	historic maps	1.264	2.952	0.835	6.101	8.658	1.397	9.56439	2.5	15.181	5.598	571	28.9	10.725	12.3
Probabilistic coastal cliff collapse hazard from repeated terrestrial laser surveys: case study from Mesnil Val (Normandy, northern France)	2013-01-01	Journal of Coastal Research	NA	Dewez	Thomas J.B.	Mesnil Val	English channel	Atlantic	Europe	France	750	chalk	FALSE	FALSE	FALSE	FALSE	80	20	NA	44.7	72	44.7	243	weak	0.041	NA	NA	NA	NA	0.041	2005-12-01	2006-03-01	NA	0.25	Terrestrial laser scanning	1.264	2.952	0.835	6.101	8.658	1.397	9.56439	2.5	15.181	6.69	616	44.2	10.325	13.6
Probabilistic coastal cliff collapse hazard from repeated terrestrial laser surveys: case study from Mesnil Val (Normandy, northern France)	2013-01-01	Journal of Coastal Research	NA	Dewez	Thomas J.B.	Mesnil Val	English channel	Atlantic	Europe	France	750	chalk	FALSE	FALSE	FALSE	FALSE	80	20	NA	44.7	72	44.7	243	weak	0.058	NA	NA	NA	NA	0.058	2006-03-01	2006-08-01	NA	0.42	Terrestrial laser scanning	1.264	2.952	0.835	6.101	8.658	1.397	9.56439	2.5	15.181	6.69	616	44.2	10.325	13.6
Probabilistic coastal cliff collapse hazard from repeated terrestrial laser surveys: case study from Mesnil Val (Normandy, northern France)	2013-01-01	Journal of Coastal Research	NA	Dewez	Thomas J.B.	Mesnil Val	English channel	Atlantic	Europe	France	750	chalk	FALSE	FALSE	FALSE	FALSE	80	20	NA	44.7	72	44.7	243	weak	0.23	NA	NA	NA	NA	0.23	2006-08-01	2007-03-01	NA	0.58	Terrestrial digital photogrammetry / TLS	1.264	2.952	0.835	6.101	8.658	1.397	9.56439	2.5	15.181	6.69	616	44.2	10.325	13.6
Probabilistic coastal cliff collapse hazard from repeated terrestrial laser surveys: case study from Mesnil Val (Normandy, northern France)	2013-01-01	Journal of Coastal Research	NA	Dewez	Thomas J.B.	Mesnil Val	English channel	Atlantic	Europe	France	750	chalk	FALSE	FALSE	FALSE	FALSE	80	20	NA	44.7	72	44.7	243	weak	0.001	NA	NA	NA	NA	0.001	2007-03-01	2007-09-01	NA	0.5	Terrestrial digital photogrammetry / TLS	1.264	2.952	0.835	6.101	8.658	1.397	9.56439	2.5	15.181	6.69	616	44.2	10.325	13.6
Probabilistic coastal cliff collapse hazard from repeated terrestrial laser surveys: case study from Mesnil Val (Normandy, northern France)	2013-01-01	Journal of Coastal Research	NA	Dewez	Thomas J.B.	Mesnil Val	English channel	Atlantic	Europe	France	750	chalk	FALSE	FALSE	FALSE	FALSE	80	20	NA	44.7	72	44.7	243	weak	3.374	NA	NA	NA	NA	3.374	2007-09-01	2008-04-01	NA	0.58	Terrestrial laser scanning	1.264	2.952	0.835	6.101	8.658	1.397	9.56439	2.5	15.181	6.69	616	44.2	10.325	13.6
Probabilistic coastal cliff collapse hazard from repeated terrestrial laser surveys: case study from Mesnil Val (Normandy, northern France)	2013-01-01	Journal of Coastal Research	NA	Dewez	Thomas J.B.	Mesnil Val	English channel	Atlantic	Europe	France	750	chalk	FALSE	FALSE	FALSE	FALSE	80	20	NA	44.7	72	44.7	243	weak	0.94	NA	NA	NA	NA	0.94	2005-12-01	2008-04-01	NA	2.33	Terrestrial laser scanning	1.264	2.952	0.835	6.101	8.658	1.397	9.56439	2.5	15.181	6.69	616	44.2	10.325	13.6
Bluff recession in the Elwha and Dungeness littoral cells, Washington, USA	2013-01-01	Environmental & Engineering Geoscience	NA	Parks	David S	Elwha	NA	Pacific	America	USA	4900	glacial deposits	FALSE	FALSE	FALSE	FALSE	80	NA	NA	32	73	32	260	weak	0.26	NA	NA	NA	NA	0.26	2001-01-01	2012-01-01	NA	11.01	airbone LiDAR	0.154	0.434	0.131	2.504	3.616	0.585	0.058269	2	21.569	1.288	1129	54.8	8.73333	11.8
Application of airborne LiDAR to investigate rates of recession in rocky coast environments	2015-12-01	Journal of Coastal Conservation	10.1007/s11852-014-0340-1	Earlie	Claire S.	Hemmick	NA	Atlantic	Europe	UK	40	mudstone	FALSE	FALSE	FALSE	FALSE	NA	NA	11	41.5	92	41.5	118	strong	0.03	NA	NA	NA	NA	0.03	2001-01-01	2012-01-01	3.8	3.8	LiDAR-derived DEM	1.872	3.944	1.044	7.664	10.629	1.655	26.3529	3.25	12.214	3.514	878	36.1	10.525	10
Application of airborne LiDAR to investigate rates of recession in rocky coast environments	2015-12-01	Journal of Coastal Conservation	10.1007/s11852-014-0340-1	Earlie	Claire S.	Hemmick	NA	Atlantic	Europe	UK	40	sandstone	FALSE	FALSE	FALSE	FALSE	NA	NA	11	41.5	92	41.5	118	strong	0.03	NA	NA	NA	NA	0.03	2001-01-01	2012-01-01	3.8	3.8	LiDAR-derived DEM	1.872	3.944	1.044	7.664	10.629	1.655	26.3529	3.25	12.214	3.514	878	36.1	10.525	10
Application of airborne LiDAR to investigate rates of recession in rocky coast environments	2015-12-01	Journal of Coastal Conservation	10.1007/s11852-014-0340-1	Earlie	Claire S.	Pendower	NA	Atlantic	Europe	UK	40	head	FALSE	FALSE	FALSE	FALSE	NA	NA	10	37.1	69	37.1	62	weak	0.01	NA	NA	NA	NA	0.01	2001-01-01	2012-01-01	3.8	3.8	LiDAR-derived DEM	2.016	4.214	1.108	7.95	10.965	1.691	31.7037	3.5	11.038	3.442	878	36.1	10.525	10
Application of airborne LiDAR to investigate rates of recession in rocky coast environments	2015-12-01	Journal of Coastal Conservation	10.1007/s11852-014-0340-1	Earlie	Claire S.	Church Cove	NA	Atlantic	Europe	UK	64	head	FALSE	FALSE	FALSE	FALSE	NA	NA	20	21.3	53	21.3	117	weak	0.29	NA	NA	NA	NA	0.29	2001-01-01	2012-01-01	3	3	LiDAR-derived DEM	2.016	4.214	1.108	7.95	10.965	1.691	31.7037	3.5	11.038	3.385	858	38.2	10.6167	9.8
Application of airborne LiDAR to investigate rates of recession in rocky coast environments	2015-12-01	Journal of Coastal Conservation	10.1007/s11852-014-0340-1	Earlie	Claire S.	Church Cove	NA	Atlantic	Europe	UK	64	mudstone	FALSE	FALSE	FALSE	FALSE	NA	NA	20	21.3	53	21.3	117	strong	0.29	NA	NA	NA	NA	0.29	2001-01-01	2012-01-01	3	3	LiDAR-derived DEM	2.016	4.214	1.108	7.95	10.965	1.691	31.7037	3.5	11.038	3.385	858	38.2	10.6167	9.8
Application of airborne LiDAR to investigate rates of recession in rocky coast environments	2015-12-01	Journal of Coastal Conservation	10.1007/s11852-014-0340-1	Earlie	Claire S.	Church Cove	NA	Atlantic	Europe	UK	64	sandstone	FALSE	FALSE	FALSE	FALSE	NA	NA	20	21.3	53	21.3	117	strong	0.29	NA	NA	NA	NA	0.29	2001-01-01	2012-01-01	3	3	LiDAR-derived DEM	2.016	4.214	1.108	7.95	10.965	1.691	31.7037	3.5	11.038	3.385	858	38.2	10.6167	9.8
Application of airborne LiDAR to investigate rates of recession in rocky coast environments	2015-12-01	Journal of Coastal Conservation	10.1007/s11852-014-0340-1	Earlie	Claire S.	Portheleven	NA	Atlantic	Europe	UK	265	sandstone	FALSE	FALSE	FALSE	FALSE	NA	NA	17	40.7	90	40.7	98	strong	0.09	NA	NA	NA	NA	0.09	2001-01-01	2012-01-01	3.5	3.5	LiDAR-derived DEM	2.016	4.214	1.108	7.95	10.965	1.691	31.7037	3.5	11.038	3.453	858	38.2	10.6167	9.8
Application of airborne LiDAR to investigate rates of recession in rocky coast environments	2015-12-01	Journal of Coastal Conservation	10.1007/s11852-014-0340-1	Earlie	Claire S.	Porthcurno	NA	Atlantic	Europe	UK	780	granite	FALSE	FALSE	FALSE	FALSE	NA	NA	50	36.6	83	36.6	75	strong	0.001	NA	NA	NA	NA	0.001	2001-01-01	2012-01-01	3	3	LiDAR-derived DEM	2.016	4.214	1.108	7.95	10.965	1.691	31.7037	3.5	11.038	3.61	1013	32.3	10.725	9.8
Application of airborne LiDAR to investigate rates of recession in rocky coast environments	2015-12-01	Journal of Coastal Conservation	10.1007/s11852-014-0340-1	Earlie	Claire S.	Godrevy	NA	Atlantic	Europe	UK	660	head	FALSE	FALSE	FALSE	FALSE	NA	NA	15	35.1	74	35.1	246	weak	0.04	NA	NA	NA	NA	0.04	2001-01-01	2012-01-01	2	2	LiDAR-derived DEM	2.016	4.214	1.108	7.95	10.965	1.691	31.7037	3.5	11.038	4.491	858	38.2	10.6167	9.8
Application of airborne LiDAR to investigate rates of recession in rocky coast environments	2015-12-01	Journal of Coastal Conservation	10.1007/s11852-014-0340-1	Earlie	Claire S.	Portreath	NA	Atlantic	Europe	UK	135	mudstone	FALSE	FALSE	FALSE	FALSE	NA	NA	26	55.4	88	55.4	244	strong	0.06	NA	NA	NA	NA	0.06	2001-01-01	2012-01-01	3	3	LiDAR-derived DEM	2.016	4.214	1.108	7.95	10.965	1.691	31.7037	3.5	11.038	4.491	858	38.2	10.6167	9.8
Application of airborne LiDAR to investigate rates of recession in rocky coast environments	2015-12-01	Journal of Coastal Conservation	10.1007/s11852-014-0340-1	Earlie	Claire S.	Portreath	NA	Atlantic	Europe	UK	135	sandstone	FALSE	FALSE	FALSE	FALSE	NA	NA	26	55.4	88	55.4	244	strong	0.06	NA	NA	NA	NA	0.06	2001-01-01	2012-01-01	3	3	LiDAR-derived DEM	2.016	4.214	1.108	7.95	10.965	1.691	31.7037	3.5	11.038	4.491	858	38.2	10.6167	9.8
Application of airborne LiDAR to investigate rates of recession in rocky coast environments	2015-12-01	Journal of Coastal Conservation	10.1007/s11852-014-0340-1	Earlie	Claire S.	Bedruthan Steps	NA	Atlantic	Europe	UK	380	slate	FALSE	FALSE	FALSE	FALSE	NA	NA	45	46.8	84	46.8	134	medium	0.17	NA	NA	NA	NA	0.17	2001-01-01	2012-01-01	2.5	2.5	LiDAR-derived DEM	2.016	4.214	1.108	7.95	10.965	1.691	31.7037	3.5	11.038	4.806	858	38.2	10.6167	9.8
Application of airborne LiDAR to investigate rates of recession in rocky coast environments	2015-12-01	Journal of Coastal Conservation	10.1007/s11852-014-0340-1	Earlie	Claire S.	Trevellas	NA	Atlantic	Europe	UK	200	limestone	FALSE	FALSE	FALSE	FALSE	NA	NA	70	57.4	92	57.4	226	strong	0.08	NA	NA	NA	NA	0.08	2001-01-01	2012-01-01	1	1	LiDAR-derived DEM	2.016	4.214	1.108	7.95	10.965	1.691	31.7037	3.5	11.038	4.599	858	38.2	10.6167	9.8
Application of airborne LiDAR to investigate rates of recession in rocky coast environments	2015-12-01	Journal of Coastal Conservation	10.1007/s11852-014-0340-1	Earlie	Claire S.	Trevellas	NA	Atlantic	Europe	UK	200	sandstone	FALSE	FALSE	FALSE	FALSE	NA	NA	70	57.4	92	57.4	226	strong	0.08	NA	NA	NA	NA	0.08	2001-01-01	2012-01-01	1	1	LiDAR-derived DEM	2.016	4.214	1.108	7.95	10.965	1.691	31.7037	3.5	11.038	4.599	858	38.2	10.6167	9.8
Application of airborne LiDAR to investigate rates of recession in rocky coast environments	2015-12-01	Journal of Coastal Conservation	10.1007/s11852-014-0340-1	Earlie	Claire S.	Trevellas	NA	Atlantic	Europe	UK	200	slate	FALSE	FALSE	FALSE	FALSE	NA	NA	70	57.4	92	57.4	226	medium	0.08	NA	NA	NA	NA	0.08	2001-01-01	2012-01-01	1	1	LiDAR-derived DEM	2.016	4.214	1.108	7.95	10.965	1.691	31.7037	3.5	11.038	4.599	858	38.2	10.6167	9.8
Application of Airborne LIDAR for Seacliff Volumetric Change and Beach-Sediment Budget Contributions	2006-01-01	Journal of Coastal Research	10.2112/05-0548.1	Young	Adam P	Torrey Pines	NA	Pacific	America	USA	6550	mudstone	FALSE	FALSE	FALSE	FALSE	NA	NA	88	-999	-999	-999	353	strong	0.046	NA	NA	NA	NA	0.046	1998-04-01	2004-04-01	NA	6.01	LiDAR	1.266	1.887	0.338	10.304	12.628	1.39	16.2045	2.75	12.989	1.221	200	4.2	17.3667	8.8
Application of Airborne LIDAR for Seacliff Volumetric Change and Beach-Sediment Budget Contributions	2006-01-01	Journal of Coastal Research	10.2112/05-0548.1	Young	Adam P	Del Mar	NA	Pacific	America	USA	2550	mudstone	FALSE	FALSE	FALSE	FALSE	NA	NA	17	-999	-999	-999	166	strong	0.126	NA	NA	NA	NA	0.126	1998-04-01	2004-04-01	NA	6.01	LiDAR	1.266	1.887	0.338	10.304	12.628	1.39	16.2045	2.75	12.989	1.212	200	4.2	17.3667	8.8
Application of Airborne LIDAR for Seacliff Volumetric Change and Beach-Sediment Budget Contributions	2006-01-01	Journal of Coastal Research	10.2112/05-0548.1	Young	Adam P	Solana Beach	NA	Pacific	America	USA	2800	mudstone	FALSE	FALSE	FALSE	FALSE	NA	NA	23	-999	-999	-999	166	strong	0.106	NA	NA	NA	NA	0.106	1998-04-01	2004-04-01	NA	6.01	LiDAR	1.266	1.887	0.338	10.304	12.628	1.39	16.2045	2.75	12.989	1.212	200	4.2	17.3667	8.8
Application of Airborne LIDAR for Seacliff Volumetric Change and Beach-Sediment Budget Contributions	2006-01-01	Journal of Coastal Research	10.2112/05-0548.1	Young	Adam P	Cardiff	NA	Pacific	America	USA	3740	mudstone	FALSE	FALSE	FALSE	FALSE	NA	NA	25	27.6	53	27.6	153	strong	0.061	NA	NA	NA	NA	0.061	1998-04-01	2004-04-01	NA	6.01	LiDAR	1.266	1.887	0.338	10.304	12.628	1.39	16.2045	2.75	12.989	1.212	287	14.7	16.5917	11.6
Application of Airborne LIDAR for Seacliff Volumetric Change and Beach-Sediment Budget Contributions	2006-01-01	Journal of Coastal Research	10.2112/05-0548.1	Young	Adam P	Leucadia	NA	Pacific	America	USA	3980	mudstone	FALSE	FALSE	FALSE	FALSE	NA	NA	26	-999	-999	-999	160	strong	0.048	NA	NA	NA	NA	0.048	1998-04-01	2004-04-01	NA	6.01	LiDAR	1.266	1.887	0.338	10.304	12.628	1.39	16.2045	2.75	12.989	1.215	287	14.7	16.5917	11.6
Application of Airborne LIDAR for Seacliff Volumetric Change and Beach-Sediment Budget Contributions	2006-01-01	Journal of Coastal Research	10.2112/05-0548.1	Young	Adam P	Carlsbad	NA	Pacific	America	USA	6910	mudstone	FALSE	FALSE	FALSE	FALSE	NA	NA	16	8.6	17	8.6	149	strong	0.036	NA	NA	NA	NA	0.036	1998-04-01	2004-04-01	NA	6.01	LiDAR	1.266	1.887	0.338	10.304	12.628	1.39	16.2045	2.75	12.989	1.215	287	14.7	16.5917	11.6
Application of Airborne LIDAR for Seacliff Volumetric Change and Beach-Sediment Budget Contributions	2006-01-01	Journal of Coastal Research	10.2112/05-0548.1	Young	Adam P	Camp Pendleton	NA	Pacific	America	USA	4970	mudstone	FALSE	FALSE	FALSE	FALSE	NA	NA	17	10.3	27	10.3	140	strong	0.062	NA	NA	NA	NA	0.062	1998-04-01	2004-04-01	NA	6.01	LiDAR	1.266	1.887	0.338	10.304	12.628	1.39	16.2045	2.75	12.989	1.191	287	14.7	16.5917	11.6
The retreat of eastern quarteira cliffed coast and its possible causes	2006-01-01	Studies in European Coastal Management	NA	Correia	F	Forte Novo	NA	Atlantic	Europe	Portugal	375	sand	TRUE	FALSE	FALSE	FALSE	NA	NA	NA	6.2	12	6.2	119	weak	NA	8	NA	NA	NA	0.726612	1958-01-01	1969-01-01	NA	11.01	Stereoplotter	1.463	2.768	0.68	8.37	12.172	2.08	17.5783	3.75	10.049	2.085	436	5.3	16.0333	12.2
The retreat of eastern quarteira cliffed coast and its possible causes	2006-01-01	Studies in European Coastal Management	NA	Correia	F	Forte Novo	NA	Atlantic	Europe	Portugal	375	sand	TRUE	FALSE	FALSE	FALSE	NA	NA	NA	6.2	12	6.2	119	weak	NA	9.5	NA	NA	NA	1.35714	1969-01-01	1976-01-01	NA	7	Stereoplotter	1.463	2.768	0.68	8.37	12.172	2.08	17.5783	3.75	10.049	2.085	436	5.3	16.0333	12.2
The retreat of eastern quarteira cliffed coast and its possible causes	2006-01-01	Studies in European Coastal Management	NA	Correia	F	Forte Novo	NA	Atlantic	Europe	Portugal	375	sand	TRUE	FALSE	FALSE	FALSE	NA	NA	NA	6.2	12	6.2	119	weak	NA	21.9	NA	NA	NA	3.12411	1976-01-01	1983-01-01	NA	7.01	Stereoplotter	1.463	2.768	0.68	8.37	12.172	2.08	17.5783	3.75	10.049	2.085	436	5.3	16.0333	12.2
The retreat of eastern quarteira cliffed coast and its possible causes	2006-01-01	Studies in European Coastal Management	NA	Correia	F	Forte Novo	NA	Atlantic	Europe	Portugal	375	sand	TRUE	FALSE	FALSE	FALSE	NA	NA	NA	6.2	12	6.2	119	weak	NA	28.3	NA	NA	NA	3.53308	1983-01-01	1991-01-01	NA	8.01	Stereoplotter	1.463	2.768	0.68	8.37	12.172	2.08	17.5783	3.75	10.049	2.085	436	5.3	16.0333	12.2
The retreat of eastern quarteira cliffed coast and its possible causes	2006-01-01	Studies in European Coastal Management	NA	Correia	F	Trafal	NA	Atlantic	Europe	Portugal	375	sand	TRUE	FALSE	FALSE	FALSE	NA	NA	NA	6.2	11	6.2	119	weak	NA	8.1	NA	NA	NA	0.735695	1958-01-01	1969-01-01	NA	11.01	Stereoplotter	1.463	2.768	0.68	8.37	12.172	2.08	17.5783	3.75	10.049	2.085	436	5.3	16.0333	12.2
The retreat of eastern quarteira cliffed coast and its possible causes	2006-01-01	Studies in European Coastal Management	NA	Correia	F	Trafal	NA	Atlantic	Europe	Portugal	375	sand	TRUE	FALSE	FALSE	FALSE	NA	NA	NA	6.2	11	6.2	119	weak	NA	5	NA	NA	NA	0.356888	1969-01-01	1983-01-01	NA	14.01	NA	1.463	2.768	0.68	8.37	12.172	2.08	17.5783	3.75	10.049	2.085	436	5.3	16.0333	12.2
The retreat of eastern quarteira cliffed coast and its possible causes	2006-01-01	Studies in European Coastal Management	NA	Correia	F	Trafal	NA	Atlantic	Europe	Portugal	375	sand	TRUE	FALSE	FALSE	FALSE	NA	NA	NA	6.2	11	6.2	119	weak	NA	11.2	NA	NA	NA	1.59772	1976-01-01	1983-01-01	NA	7.01	Stereoplotter	1.463	2.768	0.68	8.37	12.172	2.08	17.5783	3.75	10.049	2.085	436	5.3	16.0333	12.2
The retreat of eastern quarteira cliffed coast and its possible causes	2006-01-01	Studies in European Coastal Management	NA	Correia	F	Trafal	NA	Atlantic	Europe	Portugal	375	sand	TRUE	FALSE	FALSE	FALSE	NA	NA	NA	6.2	11	6.2	119	weak	NA	24.4	NA	NA	NA	3.04619	1983-01-01	1991-01-01	NA	8.01	Stereoplotter	1.463	2.768	0.68	8.37	12.172	2.08	17.5783	3.75	10.049	2.085	436	5.3	16.0333	12.2
Slope mass movements on rocky sea-cliffs: A power-law distributed natural hazard on the Barlavento Coast, Algarve, Portugal	2006-06-01	Continental Shelf Research	10.1016/j.csr.2005.12.013	Teixeira	Sebastião Braz	Algarve	NA	Atlantic	Europe	Portugal	46000	limestone	TRUE	FALSE	FALSE	FALSE	40	5	NA	17.8	67	17.8	89	strong	0.09	NA	NA	NA	NA	0.09	1995-06-01	2004-05-01	NA	8.92	Rockfall inventory	1.463	2.768	0.68	8.37	12.172	2.08	17.5783	3.75	10.049	2.085	447	2.1	16.3667	11.3
Approche quantitative de la discontinuité de l'évolution de formes littorales à différentes échelles de temps. Exemple du recul de la côte de l'Arrábida (Portugal)/Quantitative approach of a non linear and scale dependand landform evolution : rate of a retreat coastline in Portugal, Arrábida	1995-01-01	Géomorphologie : relief, processus, environnement	10.3406/morfo.1995.856	Regnauld	Hervé	Arrabida	NA	Atlantic	Europe	Portugal	NA	conglomerate	FALSE	FALSE	FALSE	FALSE	NA	NA	NA	79.6	312	79.6	74	strong	0.001	NA	NA	NA	NA	0.001	1995-06-01	2004-05-01	5500	5500	geomorphology	1.482	2.898	0.724	8.994	12.712	2.144	19.3826	4.25	9.007	2.057	682	0.3	16.6917	11.6
Approche quantitative de la discontinuité de l'évolution de formes littorales à différentes échelles de temps. Exemple du recul de la côte de l'Arrábida (Portugal)/Quantitative approach of a non linear and scale dependand landform evolution : rate of a retreat coastline in Portugal, Arrábida	1995-01-01	Géomorphologie : relief, processus, environnement	10.3406/morfo.1995.856	Regnauld	Hervé	Arrabida	NA	Atlantic	Europe	Portugal	NA	conglomerate	FALSE	FALSE	FALSE	FALSE	NA	NA	NA	79.6	312	79.6	74	strong	0.001	NA	NA	NA	NA	0.001	1995-06-01	2004-05-01	120000	120000	geomorphology	1.482	2.898	0.724	8.994	12.712	2.144	19.3826	4.25	9.007	2.057	682	0.3	16.6917	11.6
Approche quantitative de la discontinuité de l'évolution de formes littorales à différentes échelles de temps. Exemple du recul de la côte de l'Arrábida (Portugal)/Quantitative approach of a non linear and scale dependand landform evolution : rate of a retreat coastline in Portugal, Arrábida	1995-01-01	Géomorphologie : relief, processus, environnement	10.3406/morfo.1995.856	Regnauld	Hervé	Arrabida	NA	Atlantic	Europe	Portugal	NA	conglomerate	FALSE	FALSE	FALSE	FALSE	NA	NA	NA	79.6	312	79.6	74	strong	0.001	NA	NA	NA	NA	0.001	1995-06-01	2004-05-01	7100000	7100000	geomorphology	1.482	2.898	0.724	8.994	12.712	2.144	19.3826	4.25	9.007	2.057	682	0.3	16.6917	11.6
Approche quantitative de la discontinuité de l'évolution de formes littorales à différentes échelles de temps. Exemple du recul de la côte de l'Arrábida (Portugal)/Quantitative approach of a non linear and scale dependand landform evolution : rate of a retreat coastline in Portugal, Arrábida	1995-01-01	Géomorphologie : relief, processus, environnement	10.3406/morfo.1995.856	Regnauld	Hervé	Arrabida	NA	Atlantic	Europe	Portugal	NA	limestone	FALSE	FALSE	FALSE	FALSE	NA	NA	NA	79.6	312	79.6	74	strong	0.001	NA	NA	NA	NA	0.001	1995-06-01	2004-05-01	5500	5500	geomorphology	1.482	2.898	0.724	8.994	12.712	2.144	19.3826	4.25	9.007	2.057	682	0.3	16.6917	11.6
Approche quantitative de la discontinuité de l'évolution de formes littorales à différentes échelles de temps. Exemple du recul de la côte de l'Arrábida (Portugal)/Quantitative approach of a non linear and scale dependand landform evolution : rate of a retreat coastline in Portugal, Arrábida	1995-01-01	Géomorphologie : relief, processus, environnement	10.3406/morfo.1995.856	Regnauld	Hervé	Arrabida	NA	Atlantic	Europe	Portugal	NA	limestone	FALSE	FALSE	FALSE	FALSE	NA	NA	NA	79.6	312	79.6	74	strong	0.001	NA	NA	NA	NA	0.001	1995-06-01	2004-05-01	120000	120000	geomorphology	1.482	2.898	0.724	8.994	12.712	2.144	19.3826	4.25	9.007	2.057	682	0.3	16.6917	11.6
Approche quantitative de la discontinuité de l'évolution de formes littorales à différentes échelles de temps. Exemple du recul de la côte de l'Arrábida (Portugal)/Quantitative approach of a non linear and scale dependand landform evolution : rate of a retreat coastline in Portugal, Arrábida	1995-01-01	Géomorphologie : relief, processus, environnement	10.3406/morfo.1995.856	Regnauld	Hervé	Arrabida	NA	Atlantic	Europe	Portugal	NA	limestone	FALSE	FALSE	FALSE	FALSE	NA	NA	NA	79.6	312	79.6	74	strong	0.001	NA	NA	NA	NA	0.001	1995-06-01	2004-05-01	7100000	7100000	geomorphology	1.482	2.898	0.724	8.994	12.712	2.144	19.3826	4.25	9.007	2.057	682	0.3	16.6917	11.6
Sea cliff retreat in southern Portugal: profiles, processes, and problems	1992-01-01	Journal of Coastal Research	NA	Dias	J.M. Alveirinho	Praia de Falesia	NA	Atlantic	Europe	Portugal	4500	sandstone	FALSE	FALSE	FALSE	FALSE	45	10	NA	19.9	48	19.9	103	strong	1.6	NA	NA	NA	NA	1.6	1983-08-01	1988-12-01	NA	5.34	Peg transect (gps) averaged	1.463	2.768	0.68	8.37	12.172	2.08	17.5783	3.75	10.049	2.085	436	5.3	16.0333	12.2
Sea cliff retreat in southern Portugal: profiles, processes, and problems	1992-01-01	Journal of Coastal Research	NA	Dias	J.M. Alveirinho	Forte Novo / Vale de Lobo	NA	Atlantic	Europe	Portugal	6000	sandstone	FALSE	FALSE	FALSE	FALSE	20	10	NA	11.7	40	11.7	119	strong	2.4	NA	NA	NA	NA	2.4	1983-07-31	1988-11-30	NA	5.34	Peg transect (gps) averaged	1.463	2.768	0.68	8.37	12.172	2.08	17.5783	3.75	10.049	2.085	436	5.3	16.0333	12.2
Retreat rate of cliffs and scarps with different geological properties in various locations along the Estonian coast	2013-01-01	Journal of Coastal Research	NA	Orviku	Kaarel	Osmusaar Island	Baltic	Atlantic	Europe	Estonia	NA	limestone	FALSE	FALSE	FALSE	FALSE	NA	NA	7	6.4	11	6.4	293	strong	0.07	NA	NA	NA	NA	0.07	1983-07-31	1988-11-30	240	240	survey	NA	2.228	NA	NA	6.321	NA	NA	2	19.591	0.065	487	118.5	5.15833	22.4
Retreat rate of cliffs and scarps with different geological properties in various locations along the Estonian coast	2013-01-01	Journal of Coastal Research	NA	Orviku	Kaarel	Pakri Peninsula	Baltic	Atlantic	Europe	Estonia	NA	limestone	FALSE	FALSE	FALSE	FALSE	NA	NA	25	20.6	34	20.6	233	strong	0.25	NA	NA	NA	NA	0.25	1983-07-31	1988-11-30	275	275	survey	NA	2.228	NA	NA	6.321	NA	NA	2	19.591	0.033	507	116.5	5.20833	22.4
Retreat rate of cliffs and scarps with different geological properties in various locations along the Estonian coast	2013-01-01	Journal of Coastal Research	NA	Orviku	Kaarel	Kakumae Cliff	Baltic	Atlantic	Europe	Estonia	NA	sandstone	FALSE	FALSE	FALSE	FALSE	NA	NA	10	15.8	26	15.8	274	strong	0.6	NA	NA	NA	NA	0.6	1953-01-01	2005-01-01	NA	52.04	survey	NA	2.228	NA	NA	6.321	NA	NA	2	19.591	0.037	526	118.7	5.19167	22.4
Retreat rate of cliffs and scarps with different geological properties in various locations along the Estonian coast	2013-01-01	Journal of Coastal Research	NA	Orviku	Kaarel	Cape Kiipsaare	Baltic	Atlantic	Europe	Estonia	NA	glaciofluvial	FALSE	FALSE	FALSE	FALSE	NA	NA	2	4.2	13	4.2	145	weak	7	NA	NA	NA	NA	7	1953-01-01	2005-01-01	14	14	aerial photography (orthorectified)	NA	2.574	NA	NA	6.591	NA	NA	2	19.751	0.064	503	106.9	5.80833	21.2
Report of the problems of coastal erosion	1977-01-01	East Sussex Country Council	NA	Thorburn	A.	Telescombe cliffs and Peacehaven	English channel	Atlantic	Europe	UK	NA	chalk	FALSE	FALSE	FALSE	FALSE	NA	NA	NA	26.9	51	26.9	100	weak	0.45	NA	NA	NA	NA	0.45	1973-01-01	1975-01-01	NA	2	historic maps	1.264	2.952	0.835	6.101	8.658	1.397	9.56439	2.5	15.181	4.701	674	46.6	10.2083	12
Report of the problems of coastal erosion	1977-01-01	East Sussex Country Council	NA	Thorburn	A.	Peacehaven to Newhaven	English channel	Atlantic	Europe	UK	NA	chalk	FALSE	FALSE	FALSE	FALSE	NA	NA	NA	29.5	75	29.5	98	weak	0.6	NA	NA	NA	NA	0.6	1925-01-01	1955-01-01	NA	30.02	historic maps	1.264	2.952	0.835	6.101	8.658	1.397	9.56439	2.5	15.181	4.701	605	43.8	10.3	12
Report of the problems of coastal erosion	1977-01-01	East Sussex Country Council	NA	Thorburn	A.	Seaford Head to Cuckmere Head	English channel	Atlantic	Europe	UK	NA	chalk	FALSE	FALSE	FALSE	FALSE	NA	NA	NA	33.3	79	33.3	97	weak	0.3	NA	NA	NA	NA	0.3	1973-01-01	1975-01-01	NA	2	historic maps	1.264	2.952	0.835	6.101	8.658	1.397	9.56439	2.5	15.181	4.859	605	43.8	10.3	12
Report of the problems of coastal erosion	1977-01-01	East Sussex Country Council	NA	Thorburn	A.	Cuckmere Haven to Birling Gap	English channel	Atlantic	Europe	UK	NA	chalk	FALSE	FALSE	FALSE	FALSE	NA	NA	NA	38.1	82	38.1	108	weak	1.25	NA	NA	NA	NA	1.25	1973-01-01	1975-01-01	NA	2	historic maps	1.264	2.952	0.835	6.101	8.658	1.397	9.56439	2.5	15.181	4.859	605	43.8	10.3	12
Report of the problems of coastal erosion	1977-01-01	East Sussex Country Council	NA	Thorburn	A.	Birling Gap	English channel	Atlantic	Europe	UK	NA	chalk	FALSE	FALSE	FALSE	FALSE	NA	NA	NA	35.3	95	35.3	101	weak	1.08	NA	NA	NA	NA	1.08	1925-01-01	1955-01-01	NA	30.02	historic maps	1.264	2.952	0.835	6.101	8.658	1.397	9.56439	2.5	15.181	5.114	605	43.8	10.3	12
Report of the problems of coastal erosion	1977-01-01	East Sussex Country Council	NA	Thorburn	A.	Beachy Head to Eastbourne	English channel	Atlantic	Europe	UK	NA	chalk	FALSE	FALSE	FALSE	FALSE	NA	NA	NA	57.8	153	57.8	64	weak	0.54	NA	NA	NA	NA	0.54	1925-01-01	1955-01-01	NA	30.02	historic maps	1.264	2.952	0.835	6.101	8.658	1.397	9.56439	2.5	15.181	5.114	605	43.8	10.3	12
Report of the problems of coastal erosion	1977-01-01	East Sussex Country Council	NA	Thorburn	A.	Seven Sisters	English channel	Atlantic	Europe	UK	NA	chalk	FALSE	FALSE	FALSE	FALSE	NA	NA	NA	32.1	76	32.1	100	weak	0.4	NA	NA	NA	NA	0.4	1925-01-01	1955-01-01	NA	30.02	historic maps	1.264	2.952	0.835	6.101	8.658	1.397	9.56439	2.5	15.181	4.859	605	43.8	10.3	12
Sussex: Environment, Landscape and Society	1983-01-01	NA	NA	Robinson	David A.	Brighton to Belle Tout lighthouse	English channel	Atlantic	Europe	UK	NA	chalk	FALSE	FALSE	FALSE	FALSE	NA	NA	NA	24.1	82	24.1	99	weak	0.4	NA	NA	NA	NA	0.4	1973-01-01	1975-01-01	NA	2	NA	1.264	2.952	0.835	6.101	8.658	1.397	9.56439	2.5	15.181	4.859	605	43.8	10.3	12
Classics landforms of the Sussex coast	1996-01-01	The Geographical Association	NA	Castleden	Rodney	Seaford Head	English channel	Atlantic	Europe	UK	NA	chalk	FALSE	FALSE	FALSE	FALSE	NA	NA	NA	30.5	63	30.5	87	weak	0.3	NA	NA	NA	NA	0.3	1973-01-01	1975-01-01	NA	2	NA	1.264	2.952	0.835	6.101	8.658	1.397	9.56439	2.5	15.181	4.859	605	43.8	10.3	12
Classics landforms of the Sussex coast	1996-01-01	The Geographical Association	NA	Castleden	Rodney	Birling Gap	English channel	Atlantic	Europe	UK	NA	chalk	FALSE	FALSE	FALSE	FALSE	NA	NA	NA	24.5	59	24.5	119	weak	NA	NA	NA	NA	NA	NA	1950-01-01	1962-01-01	NA	12.01	NA	1.264	2.952	0.835	6.101	8.658	1.397	9.56439	2.5	15.181	5.114	605	43.8	10.3	12
Classics landforms of the Sussex coast	1996-01-01	The Geographical Association	NA	Castleden	Rodney	Birling Gap	English channel	Atlantic	Europe	UK	NA	chalk	FALSE	FALSE	FALSE	FALSE	NA	NA	NA	24.5	59	24.5	119	weak	1.22	NA	NA	NA	NA	1.22	1973-01-01	1975-01-01	NA	2	NA	1.264	2.952	0.835	6.101	8.658	1.397	9.56439	2.5	15.181	5.114	605	43.8	10.3	12
Classics landforms of the Sussex coast	1996-01-01	The Geographical Association	NA	Castleden	Rodney	Seven Sisters	English channel	Atlantic	Europe	UK	NA	chalk	FALSE	FALSE	FALSE	FALSE	NA	NA	NA	45.9	82	45.9	106	weak	1.25	NA	NA	NA	NA	1.25	1973-01-01	1975-01-01	NA	2	NA	1.264	2.952	0.835	6.101	8.658	1.397	9.56439	2.5	15.181	4.859	605	43.8	10.3	12
Coast protection peacehaven and telscombe cliffs	1977-01-01	NA	NA	Howe	D.J.	Peacehaven	English channel	Atlantic	Europe	UK	NA	chalk	FALSE	FALSE	FALSE	FALSE	NA	NA	NA	35.9	75	35.9	101	weak	0.427	NA	NA	NA	NA	0.427	01/01/1875	1967-01-01	NA	92.06	NA	1.264	2.952	0.835	6.101	8.658	1.397	9.56439	2.5	15.181	4.701	605	43.8	10.3	12
Cliff erosion in East Sussex	1987-01-01	GeMS, university of Sussex	NA	Cleeve	J.	Peacehaven	English channel	Atlantic	Europe	UK	NA	chalk	FALSE	FALSE	FALSE	FALSE	NA	NA	NA	35.9	75	35.9	101	weak	0.29	NA	NA	NA	NA	0.29	01/01/1875	1976-01-01	NA	103.07	NA	1.264	2.952	0.835	6.101	8.658	1.397	9.56439	2.5	15.181	4.701	605	43.8	10.3	12
EUROSION Case Study : Shabla - Krapetz (Bulgaria)	2004-01-01	NA	NA	Gospodinova	Ivanka	Cape Sivribourun -Cape Shabla	Black	NA	Europe	Bulgaria	12500	limestone	FALSE	FALSE	FALSE	FALSE	NA	NA	NA	8.1	19	8.1	352	strong	0.3	NA	NA	NA	NA	0.3	1983-01-01	1992-01-01	10	10	NA	0.786	1.989	0.597	4.368	6.468	1.121	2.64783	2.75	14.192	0.076	459	48.9	12.05	21.3
EUROSION Case Study : Shabla - Krapetz (Bulgaria)	2004-01-01	NA	NA	Gospodinova	Ivanka	Cape Shabla - Cape Kaliakra	Black	NA	Europe	Bulgaria	25800	limestone	TRUE	FALSE	FALSE	FALSE	60	5	NA	33.5	118	33.5	70	strong	0.05	NA	NA	NA	NA	0.05	1983-01-01	1992-01-01	10	10	NA	0.786	1.989	0.597	4.368	6.468	1.121	2.64783	2.75	14.192	0.072	491	46.8	12.0667	20.8
Cliff top recession rate and cliff hazards for the sea coast of Wolin Island (Southern Baltic)	2015-11-12	Baltica	10.5200/baltica.2015.28.10	Kostrzewski	Andrzej	Wolin II	Baltic	Atlantic	Europe	Poland	210	glaciofluvial	FALSE	FALSE	FALSE	FALSE	NA	NA	20	36.2	53	36.2	265	weak	0.04	NA	NA	NA	NA	0.04	2005-01-01	2006-01-01	NA	1	Marked trees averaged	NA	2.464	NA	NA	6.278	NA	NA	2	20.393	0.091	465	71.4	8.425	18.5
Cliff top recession rate and cliff hazards for the sea coast of Wolin Island (Southern Baltic)	2015-11-12	Baltica	10.5200/baltica.2015.28.10	Kostrzewski	Andrzej	Wolin II	Baltic	Atlantic	Europe	Poland	210	glaciofluvial	FALSE	FALSE	FALSE	FALSE	NA	NA	20	36.2	53	36.2	265	weak	0.03	NA	NA	NA	NA	0.03	2006-01-01	2007-01-01	NA	1	Marked trees averaged	NA	2.464	NA	NA	6.278	NA	NA	2	20.393	0.091	465	71.4	8.425	18.5
Cliff top recession rate and cliff hazards for the sea coast of Wolin Island (Southern Baltic)	2015-11-12	Baltica	10.5200/baltica.2015.28.10	Kostrzewski	Andrzej	Wolin II	Baltic	Atlantic	Europe	Poland	210	glaciofluvial	FALSE	FALSE	FALSE	FALSE	NA	NA	20	36.2	53	36.2	265	weak	0.03	NA	NA	NA	NA	0.03	2007-01-01	2008-01-01	NA	1	Marked trees averaged	NA	2.464	NA	NA	6.278	NA	NA	2	20.393	0.091	465	71.4	8.425	18.5
Cliff top recession rate and cliff hazards for the sea coast of Wolin Island (Southern Baltic)	2015-11-12	Baltica	10.5200/baltica.2015.28.10	Kostrzewski	Andrzej	Wolin II	Baltic	Atlantic	Europe	Poland	210	glaciofluvial	FALSE	FALSE	FALSE	FALSE	NA	NA	20	36.2	53	36.2	265	weak	0.03	NA	NA	NA	NA	0.03	2008-01-01	2009-01-01	NA	1	Marked trees averaged	NA	2.464	NA	NA	6.278	NA	NA	2	20.393	0.091	465	71.4	8.425	18.5
Cliff top recession rate and cliff hazards for the sea coast of Wolin Island (Southern Baltic)	2015-11-12	Baltica	10.5200/baltica.2015.28.10	Kostrzewski	Andrzej	Wolin II	Baltic	Atlantic	Europe	Poland	210	glaciofluvial	FALSE	FALSE	FALSE	FALSE	NA	NA	20	36.2	53	36.2	265	weak	0.06	NA	NA	NA	NA	0.06	2009-01-01	2010-01-01	NA	1	Marked trees averaged	NA	2.464	NA	NA	6.278	NA	NA	2	20.393	0.091	465	71.4	8.425	18.5
Cliff top recession rate and cliff hazards for the sea coast of Wolin Island (Southern Baltic)	2015-11-12	Baltica	10.5200/baltica.2015.28.10	Kostrzewski	Andrzej	Wolin II	Baltic	Atlantic	Europe	Poland	210	glaciofluvial	FALSE	FALSE	FALSE	FALSE	NA	NA	20	36.2	53	36.2	265	weak	0.17	NA	NA	NA	NA	0.17	2010-01-01	2011-01-01	NA	1	Marked trees averaged	NA	2.464	NA	NA	6.278	NA	NA	2	20.393	0.091	465	71.4	8.425	18.5
Cliff top recession rate and cliff hazards for the sea coast of Wolin Island (Southern Baltic)	2015-11-12	Baltica	10.5200/baltica.2015.28.10	Kostrzewski	Andrzej	Wolin II	Baltic	Atlantic	Europe	Poland	210	glaciofluvial	FALSE	FALSE	FALSE	FALSE	NA	NA	20	36.2	53	36.2	265	weak	0.69	NA	NA	NA	NA	0.69	2011-01-01	2012-01-01	NA	1	Marked trees averaged	NA	2.464	NA	NA	6.278	NA	NA	2	20.393	0.091	465	71.4	8.425	18.5
Cliff top recession rate and cliff hazards for the sea coast of Wolin Island (Southern Baltic)	2015-11-12	Baltica	10.5200/baltica.2015.28.10	Kostrzewski	Andrzej	Wolin III	Baltic	Atlantic	Europe	Poland	400	glaciofluvial	FALSE	FALSE	FALSE	FALSE	60	35	NA	56.7	72	56.7	245	weak	0.74	NA	NA	NA	NA	0.74	1984-01-01	1985-01-01	NA	1	Marked trees averaged	NA	2.464	NA	NA	6.278	NA	NA	2	20.393	0.091	452	70.1	8.58333	18.3
Cliff top recession rate and cliff hazards for the sea coast of Wolin Island (Southern Baltic)	2015-11-12	Baltica	10.5200/baltica.2015.28.10	Kostrzewski	Andrzej	Wolin III	Baltic	Atlantic	Europe	Poland	400	glaciofluvial	FALSE	FALSE	FALSE	FALSE	60	35	NA	56.7	72	56.7	245	weak	0.16	NA	NA	NA	NA	0.16	1985-01-01	1986-01-01	NA	1	Marked trees averaged	NA	2.464	NA	NA	6.278	NA	NA	2	20.393	0.091	452	70.1	8.58333	18.3
Cliff top recession rate and cliff hazards for the sea coast of Wolin Island (Southern Baltic)	2015-11-12	Baltica	10.5200/baltica.2015.28.10	Kostrzewski	Andrzej	Wolin III	Baltic	Atlantic	Europe	Poland	400	glaciofluvial	FALSE	FALSE	FALSE	FALSE	60	35	NA	56.7	72	56.7	245	weak	0.11	NA	NA	NA	NA	0.11	1986-01-01	1987-01-01	NA	1	Marked trees averaged	NA	2.464	NA	NA	6.278	NA	NA	2	20.393	0.091	452	70.1	8.58333	18.3
Cliff top recession rate and cliff hazards for the sea coast of Wolin Island (Southern Baltic)	2015-11-12	Baltica	10.5200/baltica.2015.28.10	Kostrzewski	Andrzej	Wolin III	Baltic	Atlantic	Europe	Poland	400	glaciofluvial	FALSE	FALSE	FALSE	FALSE	60	35	NA	56.7	72	56.7	245	weak	0.01	NA	NA	NA	NA	0.01	1987-01-01	1988-01-01	NA	1	Marked trees averaged	NA	2.464	NA	NA	6.278	NA	NA	2	20.393	0.091	452	70.1	8.58333	18.3
Cliff top recession rate and cliff hazards for the sea coast of Wolin Island (Southern Baltic)	2015-11-12	Baltica	10.5200/baltica.2015.28.10	Kostrzewski	Andrzej	Wolin III	Baltic	Atlantic	Europe	Poland	400	glaciofluvial	FALSE	FALSE	FALSE	FALSE	60	35	NA	56.7	72	56.7	245	weak	0.17	NA	NA	NA	NA	0.17	1988-01-01	1989-01-01	NA	1	Marked trees averaged	NA	2.464	NA	NA	6.278	NA	NA	2	20.393	0.091	452	70.1	8.58333	18.3
Cliff top recession rate and cliff hazards for the sea coast of Wolin Island (Southern Baltic)	2015-11-12	Baltica	10.5200/baltica.2015.28.10	Kostrzewski	Andrzej	Wolin III	Baltic	Atlantic	Europe	Poland	400	glaciofluvial	FALSE	FALSE	FALSE	FALSE	60	35	NA	56.7	72	56.7	245	weak	0.05	NA	NA	NA	NA	0.05	1989-01-01	1990-01-01	NA	1	Marked trees averaged	NA	2.464	NA	NA	6.278	NA	NA	2	20.393	0.091	452	70.1	8.58333	18.3
Cliff top recession rate and cliff hazards for the sea coast of Wolin Island (Southern Baltic)	2015-11-12	Baltica	10.5200/baltica.2015.28.10	Kostrzewski	Andrzej	Wolin III	Baltic	Atlantic	Europe	Poland	400	glaciofluvial	FALSE	FALSE	FALSE	FALSE	60	35	NA	56.7	72	56.7	245	weak	0.001	NA	NA	NA	NA	0.001	1990-01-01	1991-01-01	NA	1	Marked trees averaged	NA	2.464	NA	NA	6.278	NA	NA	2	20.393	0.091	452	70.1	8.58333	18.3
Cliff top recession rate and cliff hazards for the sea coast of Wolin Island (Southern Baltic)	2015-11-12	Baltica	10.5200/baltica.2015.28.10	Kostrzewski	Andrzej	Wolin III	Baltic	Atlantic	Europe	Poland	400	glaciofluvial	FALSE	FALSE	FALSE	FALSE	60	35	NA	56.7	72	56.7	245	weak	0.001	NA	NA	NA	NA	0.001	1991-01-01	1992-01-01	NA	1	Marked trees averaged	NA	2.464	NA	NA	6.278	NA	NA	2	20.393	0.091	452	70.1	8.58333	18.3
Cliff top recession rate and cliff hazards for the sea coast of Wolin Island (Southern Baltic)	2015-11-12	Baltica	10.5200/baltica.2015.28.10	Kostrzewski	Andrzej	Wolin III	Baltic	Atlantic	Europe	Poland	400	glaciofluvial	FALSE	FALSE	FALSE	FALSE	60	35	NA	56.7	72	56.7	245	weak	0.02	NA	NA	NA	NA	0.02	1992-01-01	1993-01-01	NA	1	Marked trees averaged	NA	2.464	NA	NA	6.278	NA	NA	2	20.393	0.091	452	70.1	8.58333	18.3
Cliff top recession rate and cliff hazards for the sea coast of Wolin Island (Southern Baltic)	2015-11-12	Baltica	10.5200/baltica.2015.28.10	Kostrzewski	Andrzej	Wolin III	Baltic	Atlantic	Europe	Poland	400	glaciofluvial	FALSE	FALSE	FALSE	FALSE	60	35	NA	56.7	72	56.7	245	weak	0.001	NA	NA	NA	NA	0.001	1993-01-01	1994-01-01	NA	1	Marked trees averaged	NA	2.464	NA	NA	6.278	NA	NA	2	20.393	0.091	452	70.1	8.58333	18.3
Cliff top recession rate and cliff hazards for the sea coast of Wolin Island (Southern Baltic)	2015-11-12	Baltica	10.5200/baltica.2015.28.10	Kostrzewski	Andrzej	Wolin III	Baltic	Atlantic	Europe	Poland	400	glaciofluvial	FALSE	FALSE	FALSE	FALSE	60	35	NA	56.7	72	56.7	245	weak	0.01	NA	NA	NA	NA	0.01	1994-01-01	1995-01-01	NA	1	Marked trees averaged	NA	2.464	NA	NA	6.278	NA	NA	2	20.393	0.091	452	70.1	8.58333	18.3
Cliff top recession rate and cliff hazards for the sea coast of Wolin Island (Southern Baltic)	2015-11-12	Baltica	10.5200/baltica.2015.28.10	Kostrzewski	Andrzej	Wolin III	Baltic	Atlantic	Europe	Poland	400	glaciofluvial	FALSE	FALSE	FALSE	FALSE	60	35	NA	56.7	72	56.7	245	weak	0.32	NA	NA	NA	NA	0.32	1995-01-01	1996-01-01	NA	1	Marked trees averaged	NA	2.464	NA	NA	6.278	NA	NA	2	20.393	0.091	452	70.1	8.58333	18.3
Cliff top recession rate and cliff hazards for the sea coast of Wolin Island (Southern Baltic)	2015-11-12	Baltica	10.5200/baltica.2015.28.10	Kostrzewski	Andrzej	Wolin III	Baltic	Atlantic	Europe	Poland	400	glaciofluvial	FALSE	FALSE	FALSE	FALSE	60	35	NA	56.7	72	56.7	245	weak	0.13	NA	NA	NA	NA	0.13	1996-01-01	1997-01-01	NA	1	Marked trees averaged	NA	2.464	NA	NA	6.278	NA	NA	2	20.393	0.091	452	70.1	8.58333	18.3
Cliff top recession rate and cliff hazards for the sea coast of Wolin Island (Southern Baltic)	2015-11-12	Baltica	10.5200/baltica.2015.28.10	Kostrzewski	Andrzej	Wolin III	Baltic	Atlantic	Europe	Poland	400	glaciofluvial	FALSE	FALSE	FALSE	FALSE	60	35	NA	56.7	72	56.7	245	weak	0.23	NA	NA	NA	NA	0.23	1997-01-01	1998-01-01	NA	1	Marked trees averaged	NA	2.464	NA	NA	6.278	NA	NA	2	20.393	0.091	452	70.1	8.58333	18.3
Cliff top recession rate and cliff hazards for the sea coast of Wolin Island (Southern Baltic)	2015-11-12	Baltica	10.5200/baltica.2015.28.10	Kostrzewski	Andrzej	Wolin III	Baltic	Atlantic	Europe	Poland	400	glaciofluvial	FALSE	FALSE	FALSE	FALSE	60	35	NA	56.7	72	56.7	245	weak	0.18	NA	NA	NA	NA	0.18	1998-01-01	1999-01-01	NA	1	Marked trees averaged	NA	2.464	NA	NA	6.278	NA	NA	2	20.393	0.091	452	70.1	8.58333	18.3
Cliff top recession rate and cliff hazards for the sea coast of Wolin Island (Southern Baltic)	2015-11-12	Baltica	10.5200/baltica.2015.28.10	Kostrzewski	Andrzej	Wolin III	Baltic	Atlantic	Europe	Poland	400	glaciofluvial	FALSE	FALSE	FALSE	FALSE	60	35	NA	56.7	72	56.7	245	weak	0.07	NA	NA	NA	NA	0.07	1999-01-01	2000-01-01	NA	1	Marked trees averaged	NA	2.464	NA	NA	6.278	NA	NA	2	20.393	0.091	452	70.1	8.58333	18.3
Cliff top recession rate and cliff hazards for the sea coast of Wolin Island (Southern Baltic)	2015-11-12	Baltica	10.5200/baltica.2015.28.10	Kostrzewski	Andrzej	Wolin III	Baltic	Atlantic	Europe	Poland	400	glaciofluvial	FALSE	FALSE	FALSE	FALSE	60	35	NA	56.7	72	56.7	245	weak	0.25	NA	NA	NA	NA	0.25	2000-01-01	2001-01-01	NA	1	Marked trees averaged	NA	2.464	NA	NA	6.278	NA	NA	2	20.393	0.091	452	70.1	8.58333	18.3
Cliff top recession rate and cliff hazards for the sea coast of Wolin Island (Southern Baltic)	2015-11-12	Baltica	10.5200/baltica.2015.28.10	Kostrzewski	Andrzej	Wolin III	Baltic	Atlantic	Europe	Poland	400	glaciofluvial	FALSE	FALSE	FALSE	FALSE	60	35	NA	56.7	72	56.7	245	weak	0.17	NA	NA	NA	NA	0.17	2001-01-01	2002-01-01	NA	1	Marked trees averaged	NA	2.464	NA	NA	6.278	NA	NA	2	20.393	0.091	452	70.1	8.58333	18.3
Cliff top recession rate and cliff hazards for the sea coast of Wolin Island (Southern Baltic)	2015-11-12	Baltica	10.5200/baltica.2015.28.10	Kostrzewski	Andrzej	Wolin III	Baltic	Atlantic	Europe	Poland	400	glaciofluvial	FALSE	FALSE	FALSE	FALSE	60	35	NA	56.7	72	56.7	245	weak	0.17	NA	NA	NA	NA	0.17	2002-01-01	2003-01-01	NA	1	Marked trees averaged	NA	2.464	NA	NA	6.278	NA	NA	2	20.393	0.091	452	70.1	8.58333	18.3
Cliff top recession rate and cliff hazards for the sea coast of Wolin Island (Southern Baltic)	2015-11-12	Baltica	10.5200/baltica.2015.28.10	Kostrzewski	Andrzej	Wolin III	Baltic	Atlantic	Europe	Poland	400	glaciofluvial	FALSE	FALSE	FALSE	FALSE	60	35	NA	56.7	72	56.7	245	weak	0.23	NA	NA	NA	NA	0.23	2003-01-01	2004-01-01	NA	1	Marked trees averaged	NA	2.464	NA	NA	6.278	NA	NA	2	20.393	0.091	452	70.1	8.58333	18.3
Cliff top recession rate and cliff hazards for the sea coast of Wolin Island (Southern Baltic)	2015-11-12	Baltica	10.5200/baltica.2015.28.10	Kostrzewski	Andrzej	Wolin III	Baltic	Atlantic	Europe	Poland	400	glaciofluvial	FALSE	FALSE	FALSE	FALSE	60	35	NA	56.7	72	56.7	245	weak	0.23	NA	NA	NA	NA	0.23	2004-01-01	2005-01-01	NA	1	Marked trees averaged	NA	2.464	NA	NA	6.278	NA	NA	2	20.393	0.091	452	70.1	8.58333	18.3
Cliff top recession rate and cliff hazards for the sea coast of Wolin Island (Southern Baltic)	2015-11-12	Baltica	10.5200/baltica.2015.28.10	Kostrzewski	Andrzej	Wolin III	Baltic	Atlantic	Europe	Poland	400	glaciofluvial	FALSE	FALSE	FALSE	FALSE	60	35	NA	56.7	72	56.7	245	weak	0.001	NA	NA	NA	NA	0.001	2005-01-01	2006-01-01	NA	1	Marked trees averaged	NA	2.464	NA	NA	6.278	NA	NA	2	20.393	0.091	452	70.1	8.58333	18.3
Cliff top recession rate and cliff hazards for the sea coast of Wolin Island (Southern Baltic)	2015-11-12	Baltica	10.5200/baltica.2015.28.10	Kostrzewski	Andrzej	Wolin III	Baltic	Atlantic	Europe	Poland	400	glaciofluvial	FALSE	FALSE	FALSE	FALSE	60	35	NA	56.7	72	56.7	245	weak	0.02	NA	NA	NA	NA	0.02	2006-01-01	2007-01-01	NA	1	Marked trees averaged	NA	2.464	NA	NA	6.278	NA	NA	2	20.393	0.091	452	70.1	8.58333	18.3
Cliff top recession rate and cliff hazards for the sea coast of Wolin Island (Southern Baltic)	2015-11-12	Baltica	10.5200/baltica.2015.28.10	Kostrzewski	Andrzej	Wolin III	Baltic	Atlantic	Europe	Poland	400	glaciofluvial	FALSE	FALSE	FALSE	FALSE	60	35	NA	56.7	72	56.7	245	weak	0.11	NA	NA	NA	NA	0.11	2007-01-01	2008-01-01	NA	1	Marked trees averaged	NA	2.464	NA	NA	6.278	NA	NA	2	20.393	0.091	452	70.1	8.58333	18.3
Cliff top recession rate and cliff hazards for the sea coast of Wolin Island (Southern Baltic)	2015-11-12	Baltica	10.5200/baltica.2015.28.10	Kostrzewski	Andrzej	Wolin III	Baltic	Atlantic	Europe	Poland	400	glaciofluvial	FALSE	FALSE	FALSE	FALSE	60	35	NA	56.7	72	56.7	245	weak	0.03	NA	NA	NA	NA	0.03	2008-01-01	2009-01-01	NA	1	Marked trees averaged	NA	2.464	NA	NA	6.278	NA	NA	2	20.393	0.091	452	70.1	8.58333	18.3
Cliff top recession rate and cliff hazards for the sea coast of Wolin Island (Southern Baltic)	2015-11-12	Baltica	10.5200/baltica.2015.28.10	Kostrzewski	Andrzej	Wolin III	Baltic	Atlantic	Europe	Poland	400	glaciofluvial	FALSE	FALSE	FALSE	FALSE	60	35	NA	56.7	72	56.7	245	weak	0.21	NA	NA	NA	NA	0.21	2009-01-01	2010-01-01	NA	1	Marked trees averaged	NA	2.464	NA	NA	6.278	NA	NA	2	20.393	0.091	452	70.1	8.58333	18.3
Cliff top recession rate and cliff hazards for the sea coast of Wolin Island (Southern Baltic)	2015-11-12	Baltica	10.5200/baltica.2015.28.10	Kostrzewski	Andrzej	Wolin III	Baltic	Atlantic	Europe	Poland	400	glaciofluvial	FALSE	FALSE	FALSE	FALSE	60	35	NA	56.7	72	56.7	245	weak	0.04	NA	NA	NA	NA	0.04	2010-01-01	2011-01-01	NA	1	Marked trees averaged	NA	2.464	NA	NA	6.278	NA	NA	2	20.393	0.091	452	70.1	8.58333	18.3
Cliff top recession rate and cliff hazards for the sea coast of Wolin Island (Southern Baltic)	2015-11-12	Baltica	10.5200/baltica.2015.28.10	Kostrzewski	Andrzej	Wolin III	Baltic	Atlantic	Europe	Poland	400	glaciofluvial	FALSE	FALSE	FALSE	FALSE	60	35	NA	56.7	72	56.7	245	weak	0.31	NA	NA	NA	NA	0.31	2011-01-01	2012-01-01	NA	1	Marked trees averaged	NA	2.464	NA	NA	6.278	NA	NA	2	20.393	0.091	452	70.1	8.58333	18.3
Cliff top recession rate and cliff hazards for the sea coast of Wolin Island (Southern Baltic)	2015-11-12	Baltica	10.5200/baltica.2015.28.10	Kostrzewski	Andrzej	WolinIV	Baltic	Atlantic	Europe	Poland	200	glaciofluvial	FALSE	FALSE	FALSE	FALSE	NA	NA	50	43	71	43	238	weak	0.24	NA	NA	NA	NA	0.24	1984-01-01	1985-01-01	NA	1	Marked trees averaged	NA	2.464	NA	NA	6.278	NA	NA	2	20.393	0.091	452	70.1	8.58333	18.3
Cliff top recession rate and cliff hazards for the sea coast of Wolin Island (Southern Baltic)	2015-11-12	Baltica	10.5200/baltica.2015.28.10	Kostrzewski	Andrzej	WolinIV	Baltic	Atlantic	Europe	Poland	200	glaciofluvial	FALSE	FALSE	FALSE	FALSE	NA	NA	50	43	71	43	238	weak	0.12	NA	NA	NA	NA	0.12	1985-01-01	1986-01-01	NA	1	Marked trees averaged	NA	2.464	NA	NA	6.278	NA	NA	2	20.393	0.091	452	70.1	8.58333	18.3
Cliff top recession rate and cliff hazards for the sea coast of Wolin Island (Southern Baltic)	2015-11-12	Baltica	10.5200/baltica.2015.28.10	Kostrzewski	Andrzej	WolinIV	Baltic	Atlantic	Europe	Poland	200	glaciofluvial	FALSE	FALSE	FALSE	FALSE	NA	NA	50	43	71	43	238	weak	0.01	NA	NA	NA	NA	0.01	1986-01-01	1987-01-01	NA	1	Marked trees averaged	NA	2.464	NA	NA	6.278	NA	NA	2	20.393	0.091	452	70.1	8.58333	18.3
Cliff top recession rate and cliff hazards for the sea coast of Wolin Island (Southern Baltic)	2015-11-12	Baltica	10.5200/baltica.2015.28.10	Kostrzewski	Andrzej	WolinIV	Baltic	Atlantic	Europe	Poland	200	glaciofluvial	FALSE	FALSE	FALSE	FALSE	NA	NA	50	43	71	43	238	weak	0.01	NA	NA	NA	NA	0.01	1987-01-01	1988-01-01	NA	1	Marked trees averaged	NA	2.464	NA	NA	6.278	NA	NA	2	20.393	0.091	452	70.1	8.58333	18.3
Cliff top recession rate and cliff hazards for the sea coast of Wolin Island (Southern Baltic)	2015-11-12	Baltica	10.5200/baltica.2015.28.10	Kostrzewski	Andrzej	WolinIV	Baltic	Atlantic	Europe	Poland	200	glaciofluvial	FALSE	FALSE	FALSE	FALSE	NA	NA	50	43	71	43	238	weak	0.04	NA	NA	NA	NA	0.04	1988-01-01	1989-01-01	NA	1	Marked trees averaged	NA	2.464	NA	NA	6.278	NA	NA	2	20.393	0.091	452	70.1	8.58333	18.3
Cliff top recession rate and cliff hazards for the sea coast of Wolin Island (Southern Baltic)	2015-11-12	Baltica	10.5200/baltica.2015.28.10	Kostrzewski	Andrzej	WolinIV	Baltic	Atlantic	Europe	Poland	200	glaciofluvial	FALSE	FALSE	FALSE	FALSE	NA	NA	50	43	71	43	238	weak	0.001	NA	NA	NA	NA	0.001	1989-01-01	1990-01-01	NA	1	Marked trees averaged	NA	2.464	NA	NA	6.278	NA	NA	2	20.393	0.091	452	70.1	8.58333	18.3
Cliff top recession rate and cliff hazards for the sea coast of Wolin Island (Southern Baltic)	2015-11-12	Baltica	10.5200/baltica.2015.28.10	Kostrzewski	Andrzej	WolinIV	Baltic	Atlantic	Europe	Poland	200	glaciofluvial	FALSE	FALSE	FALSE	FALSE	NA	NA	50	43	71	43	238	weak	0.17	NA	NA	NA	NA	0.17	1990-01-01	1991-01-01	NA	1	Marked trees averaged	NA	2.464	NA	NA	6.278	NA	NA	2	20.393	0.091	452	70.1	8.58333	18.3
Cliff top recession rate and cliff hazards for the sea coast of Wolin Island (Southern Baltic)	2015-11-12	Baltica	10.5200/baltica.2015.28.10	Kostrzewski	Andrzej	WolinIV	Baltic	Atlantic	Europe	Poland	200	glaciofluvial	FALSE	FALSE	FALSE	FALSE	NA	NA	50	43	71	43	238	weak	0.03	NA	NA	NA	NA	0.03	1991-01-01	1992-01-01	NA	1	Marked trees averaged	NA	2.464	NA	NA	6.278	NA	NA	2	20.393	0.091	452	70.1	8.58333	18.3
Cliff top recession rate and cliff hazards for the sea coast of Wolin Island (Southern Baltic)	2015-11-12	Baltica	10.5200/baltica.2015.28.10	Kostrzewski	Andrzej	WolinIV	Baltic	Atlantic	Europe	Poland	200	glaciofluvial	FALSE	FALSE	FALSE	FALSE	NA	NA	50	43	71	43	238	weak	0.02	NA	NA	NA	NA	0.02	1992-01-01	1993-01-01	NA	1	Marked trees averaged	NA	2.464	NA	NA	6.278	NA	NA	2	20.393	0.091	452	70.1	8.58333	18.3
Cliff top recession rate and cliff hazards for the sea coast of Wolin Island (Southern Baltic)	2015-11-12	Baltica	10.5200/baltica.2015.28.10	Kostrzewski	Andrzej	WolinIV	Baltic	Atlantic	Europe	Poland	200	glaciofluvial	FALSE	FALSE	FALSE	FALSE	NA	NA	50	43	71	43	238	weak	0.12	NA	NA	NA	NA	0.12	1993-01-01	1994-01-01	NA	1	Marked trees averaged	NA	2.464	NA	NA	6.278	NA	NA	2	20.393	0.091	452	70.1	8.58333	18.3
Cliff top recession rate and cliff hazards for the sea coast of Wolin Island (Southern Baltic)	2015-11-12	Baltica	10.5200/baltica.2015.28.10	Kostrzewski	Andrzej	WolinIV	Baltic	Atlantic	Europe	Poland	200	glaciofluvial	FALSE	FALSE	FALSE	FALSE	NA	NA	50	43	71	43	238	weak	0.22	NA	NA	NA	NA	0.22	1994-01-01	1995-01-01	NA	1	Marked trees averaged	NA	2.464	NA	NA	6.278	NA	NA	2	20.393	0.091	452	70.1	8.58333	18.3
Cliff top recession rate and cliff hazards for the sea coast of Wolin Island (Southern Baltic)	2015-11-12	Baltica	10.5200/baltica.2015.28.10	Kostrzewski	Andrzej	WolinIV	Baltic	Atlantic	Europe	Poland	200	glaciofluvial	FALSE	FALSE	FALSE	FALSE	NA	NA	50	43	71	43	238	weak	4.33	NA	NA	NA	NA	4.33	1995-01-01	1996-01-01	NA	1	Marked trees averaged	NA	2.464	NA	NA	6.278	NA	NA	2	20.393	0.091	452	70.1	8.58333	18.3
Cliff top recession rate and cliff hazards for the sea coast of Wolin Island (Southern Baltic)	2015-11-12	Baltica	10.5200/baltica.2015.28.10	Kostrzewski	Andrzej	WolinIV	Baltic	Atlantic	Europe	Poland	200	glaciofluvial	FALSE	FALSE	FALSE	FALSE	NA	NA	50	43	71	43	238	weak	0.07	NA	NA	NA	NA	0.07	1996-01-01	1997-01-01	NA	1	Marked trees averaged	NA	2.464	NA	NA	6.278	NA	NA	2	20.393	0.091	452	70.1	8.58333	18.3
Cliff top recession rate and cliff hazards for the sea coast of Wolin Island (Southern Baltic)	2015-11-12	Baltica	10.5200/baltica.2015.28.10	Kostrzewski	Andrzej	WolinIV	Baltic	Atlantic	Europe	Poland	200	glaciofluvial	FALSE	FALSE	FALSE	FALSE	NA	NA	50	43	71	43	238	weak	0.26	NA	NA	NA	NA	0.26	1997-01-01	1998-01-01	NA	1	Marked trees averaged	NA	2.464	NA	NA	6.278	NA	NA	2	20.393	0.091	452	70.1	8.58333	18.3
Cliff top recession rate and cliff hazards for the sea coast of Wolin Island (Southern Baltic)	2015-11-12	Baltica	10.5200/baltica.2015.28.10	Kostrzewski	Andrzej	WolinIV	Baltic	Atlantic	Europe	Poland	200	glaciofluvial	FALSE	FALSE	FALSE	FALSE	NA	NA	50	43	71	43	238	weak	0.22	NA	NA	NA	NA	0.22	1998-01-01	1999-01-01	NA	1	Marked trees averaged	NA	2.464	NA	NA	6.278	NA	NA	2	20.393	0.091	452	70.1	8.58333	18.3
Cliff top recession rate and cliff hazards for the sea coast of Wolin Island (Southern Baltic)	2015-11-12	Baltica	10.5200/baltica.2015.28.10	Kostrzewski	Andrzej	WolinIV	Baltic	Atlantic	Europe	Poland	200	glaciofluvial	FALSE	FALSE	FALSE	FALSE	NA	NA	50	43	71	43	238	weak	0.03	NA	NA	NA	NA	0.03	1999-01-01	2000-01-01	NA	1	Marked trees averaged	NA	2.464	NA	NA	6.278	NA	NA	2	20.393	0.091	452	70.1	8.58333	18.3
Cliff top recession rate and cliff hazards for the sea coast of Wolin Island (Southern Baltic)	2015-11-12	Baltica	10.5200/baltica.2015.28.10	Kostrzewski	Andrzej	WolinIV	Baltic	Atlantic	Europe	Poland	200	glaciofluvial	FALSE	FALSE	FALSE	FALSE	NA	NA	50	43	71	43	238	weak	0.43	NA	NA	NA	NA	0.43	2000-01-01	2001-01-01	NA	1	Marked trees averaged	NA	2.464	NA	NA	6.278	NA	NA	2	20.393	0.091	452	70.1	8.58333	18.3
Cliff top recession rate and cliff hazards for the sea coast of Wolin Island (Southern Baltic)	2015-11-12	Baltica	10.5200/baltica.2015.28.10	Kostrzewski	Andrzej	WolinIV	Baltic	Atlantic	Europe	Poland	200	glaciofluvial	FALSE	FALSE	FALSE	FALSE	NA	NA	50	43	71	43	238	weak	0.42	NA	NA	NA	NA	0.42	2001-01-01	2002-01-01	NA	1	Marked trees averaged	NA	2.464	NA	NA	6.278	NA	NA	2	20.393	0.091	452	70.1	8.58333	18.3
Cliff top recession rate and cliff hazards for the sea coast of Wolin Island (Southern Baltic)	2015-11-12	Baltica	10.5200/baltica.2015.28.10	Kostrzewski	Andrzej	WolinIV	Baltic	Atlantic	Europe	Poland	200	glaciofluvial	FALSE	FALSE	FALSE	FALSE	NA	NA	50	43	71	43	238	weak	0.84	NA	NA	NA	NA	0.84	2002-01-01	2003-01-01	NA	1	Marked trees averaged	NA	2.464	NA	NA	6.278	NA	NA	2	20.393	0.091	452	70.1	8.58333	18.3
A methodology for the study of the relation between coastal cliff erosion and the mechanical strength of soils and rock masses	2000-01-01	Engineering Geology	NA	Budetta	Paolo	Punta Caleo	Tyrrhenian	NA	Europe	Italy	100	siltstone	FALSE	FALSE	FALSE	FALSE	NA	NA	NA	27.3	49	27.3	109	strong	0.5	NA	NA	NA	NA	0.5	1954-01-01	1984-01-01	NA	30.02	comparison historic maps / aerial photography	0.667	1.821	0.564	4.525	6.951	1.333	1.9753	3	13.925	0.266	570	23	13.975	15.3
A methodology for the study of the relation between coastal cliff erosion and the mechanical strength of soils and rock masses	2000-01-01	Engineering Geology	NA	Budetta	Paolo	Tore la punta	Tyrrhenian	NA	Europe	Italy	100	argilites	FALSE	FALSE	FALSE	FALSE	NA	NA	NA	27.3	49	27.3	82	weak	0.8	NA	NA	NA	NA	0.8	1908-01-01	1955-01-01	NA	47.03	historic maps	0.667	1.821	0.564	4.525	6.951	1.333	1.9753	3	13.925	0.267	570	23	13.975	15.3
Coastal cliff retreat rates at Beit-Yannay, Israel, in the 20th century	2004-01-02	Earth Surface Processes and Landforms	10.1002/esp.1019	Zviely	Dov	Beit Yannai	Mediterranean	Atlantic	NA	Israel	750	aeolianite	FALSE	FALSE	FALSE	FALSE	50	NA	NA	14.3	25	14.3	196	weak	0.27	NA	NA	NA	NA	0.27	1918-01-01	1946-01-01	NA	28.02	aerial photography (orthorectified)	0.805	1.768	0.503	5.161	7.546	1.252	3.28162	3.5	10.931	0.247	344	4.1	19.3917	13.3
Coastal cliff retreat rates at Beit-Yannay, Israel, in the 20th century	2004-01-02	Earth Surface Processes and Landforms	10.1002/esp.1019	Zviely	Dov	Beit Yannai	Mediterranean	Atlantic	NA	Israel	750	aeolianite	FALSE	FALSE	FALSE	FALSE	50	NA	NA	14.3	25	14.3	196	weak	0.21	NA	NA	NA	NA	0.21	1946-01-01	1973-01-01	NA	27.02	aerial photography (orthorectified)	0.805	1.768	0.503	5.161	7.546	1.252	3.28162	3.5	10.931	0.247	344	4.1	19.3917	13.3
Coastal cliff retreat rates at Beit-Yannay, Israel, in the 20th century	2004-01-02	Earth Surface Processes and Landforms	10.1002/esp.1019	Zviely	Dov	Beit Yannai	Mediterranean	Atlantic	NA	Israel	750	aeolianite	FALSE	FALSE	FALSE	FALSE	50	NA	NA	14.3	25	14.3	196	weak	0.1	NA	NA	NA	NA	0.1	1973-01-01	2000-01-01	NA	27.02	aerial photography (orthorectified)	0.805	1.768	0.503	5.161	7.546	1.252	3.28162	3.5	10.931	0.247	344	4.1	19.3917	13.3
Coastal cliff retreat rates at Beit-Yannay, Israel, in the 20th century	2004-01-02	Earth Surface Processes and Landforms	10.1002/esp.1019	Zviely	Dov	Beit Yannai	Mediterranean	Atlantic	NA	Israel	750	aeolianite	FALSE	FALSE	FALSE	FALSE	50	NA	NA	14.3	25	14.3	196	weak	0.21	NA	NA	NA	NA	0.21	1918-01-01	2000-01-01	NA	82.05	aerial photography (orthorectified)	0.805	1.768	0.503	5.161	7.546	1.252	3.28162	3.5	10.931	0.247	344	4.1	19.3917	13.3
Coastal cliff retreat rates at Beit-Yannay, Israel, in the 20th century	2004-01-02	Earth Surface Processes and Landforms	10.1002/esp.1019	Zviely	Dov	Beit Yannai	Mediterranean	Atlantic	NA	Israel	750	aeolianite	FALSE	FALSE	FALSE	FALSE	50	NA	NA	14.3	25	14.3	196	weak	0.25	NA	NA	NA	NA	0.25	1918-01-01	1973-01-01	NA	55.04	aerial photography (orthorectified)	0.805	1.768	0.503	5.161	7.546	1.252	3.28162	3.5	10.931	0.247	344	4.1	19.3917	13.3
Coastal cliff retreat rates at Beit-Yannay, Israel, in the 20th century	2004-01-02	Earth Surface Processes and Landforms	10.1002/esp.1019	Zviely	Dov	Beit Yannai	Mediterranean	Atlantic	NA	Israel	750	aeolianite	FALSE	FALSE	FALSE	FALSE	50	NA	NA	14.3	25	14.3	196	weak	0.15	NA	NA	NA	NA	0.15	1946-01-01	2000-01-01	NA	54.04	aerial photography (orthorectified)	0.805	1.768	0.503	5.161	7.546	1.252	3.28162	3.5	10.931	0.247	344	4.1	19.3917	13.3
Rates of coastal erosion and accretion in New Zealand	1978-01-12	N.Z. Journal of marine and freshwater research	NA	Gibb	Jeremy G.	Kai iwi beach	Tasman sea	Pacific	Oceania	New Zealand	NA	fluvial deposits	FALSE	FALSE	FALSE	FALSE	NA	NA	NA	14.7	47	14.7	125	weak	1.5	NA	NA	NA	NA	1.5	01/01/1876	1893-01-01	NA	17.01	NA	1.623	2.912	0.676	8.477	11.068	1.501	21.9099	2.75	15.288	1.866	1004	27.5	12.6667	9.2
Rates of coastal erosion and accretion in New Zealand	1978-01-12	N.Z. Journal of marine and freshwater research	NA	Gibb	Jeremy G.	Kai iwi beach	Tasman sea	Pacific	Oceania	New Zealand	NA	fluvial deposits	FALSE	FALSE	FALSE	FALSE	NA	NA	NA	14.7	47	14.7	125	weak	0.43	NA	NA	NA	NA	0.43	01/01/1893	1916-01-01	NA	23.01	NA	1.623	2.912	0.676	8.477	11.068	1.501	21.9099	2.75	15.288	1.866	1004	27.5	12.6667	9.2
Rates of coastal erosion and accretion in New Zealand	1978-01-12	N.Z. Journal of marine and freshwater research	NA	Gibb	Jeremy G.	Kai iwi beach	Tasman sea	Pacific	Oceania	New Zealand	NA	fluvial deposits	FALSE	FALSE	FALSE	FALSE	NA	NA	NA	14.7	47	14.7	125	weak	0.69	NA	NA	NA	NA	0.69	1942-01-01	1953-01-01	NA	11.01	NA	1.623	2.912	0.676	8.477	11.068	1.501	21.9099	2.75	15.288	1.866	1004	27.5	12.6667	9.2
Rates of coastal erosion and accretion in New Zealand	1978-01-12	N.Z. Journal of marine and freshwater research	NA	Gibb	Jeremy G.	Kai iwi beach	Tasman sea	Pacific	Oceania	New Zealand	NA	fluvial deposits	FALSE	FALSE	FALSE	FALSE	NA	NA	NA	14.7	47	14.7	125	weak	0.46	NA	NA	NA	NA	0.46	1953-01-01	1963-01-01	NA	10.01	NA	1.623	2.912	0.676	8.477	11.068	1.501	21.9099	2.75	15.288	1.866	1004	27.5	12.6667	9.2
Rates of coastal erosion and accretion in New Zealand	1978-01-12	N.Z. Journal of marine and freshwater research	NA	Gibb	Jeremy G.	Kai iwi beach	Tasman sea	Pacific	Oceania	New Zealand	NA	fluvial deposits	FALSE	FALSE	FALSE	FALSE	NA	NA	NA	14.7	47	14.7	125	weak	0.69	NA	NA	NA	NA	0.69	1963-01-01	1969-01-01	NA	6.01	NA	1.623	2.912	0.676	8.477	11.068	1.501	21.9099	2.75	15.288	1.866	1004	27.5	12.6667	9.2
Rates of coastal erosion and accretion in New Zealand	1978-01-12	N.Z. Journal of marine and freshwater research	NA	Gibb	Jeremy G.	Okehu	Tasman sea	Pacific	Oceania	New Zealand	NA	fluvial deposits	FALSE	FALSE	FALSE	FALSE	NA	NA	NA	23.7	44	23.7	125	weak	0.32	NA	NA	NA	NA	0.32	1904-01-01	1954-01-01	NA	50.04	historic maps	1.623	2.912	0.676	8.477	11.068	1.501	21.9099	2.75	15.288	1.926	1004	27.5	12.6667	9.2
Rates of coastal erosion and accretion in New Zealand	1978-01-12	N.Z. Journal of marine and freshwater research	NA	Gibb	Jeremy G.	Maxwell	Tasman sea	Pacific	Oceania	New Zealand	NA	fluvial deposits	FALSE	FALSE	FALSE	FALSE	NA	NA	NA	35	56	35	125	weak	0.4	NA	NA	NA	NA	0.4	1904-01-01	1954-01-01	NA	50.04	historic maps	1.623	2.912	0.676	8.477	11.068	1.501	21.9099	2.75	15.288	1.926	1004	27.5	12.6667	9.2
Rates of coastal erosion and accretion in New Zealand	1978-01-12	N.Z. Journal of marine and freshwater research	NA	Gibb	Jeremy G.	Trig T	Tasman sea	Pacific	Oceania	New Zealand	NA	fluvial deposits	FALSE	FALSE	FALSE	FALSE	NA	NA	NA	24.7	41	24.7	125	weak	0.72	NA	NA	NA	NA	0.72	1904-01-01	1954-01-01	NA	50.04	historic maps	1.623	2.912	0.676	8.477	11.068	1.501	21.9099	2.75	15.288	1.926	1004	27.5	12.6667	9.2
Rates of coastal erosion and accretion in New Zealand	1978-01-12	N.Z. Journal of marine and freshwater research	NA	Gibb	Jeremy G.	Power house road	Tasman sea	Pacific	Oceania	New Zealand	NA	fluvial deposits	FALSE	FALSE	FALSE	FALSE	NA	NA	NA	-999	-999	-999	125	weak	0.05	NA	NA	NA	NA	0.05	1901-01-01	1976-01-01	NA	75.05	historic maps	2.083	3.69	0.848	8.614	11.274	1.479	36.6729	2.5	17.586	2.343	1400	45.8	12.9167	8.7
Rates of coastal erosion and accretion in New Zealand	1978-01-12	N.Z. Journal of marine and freshwater research	NA	Gibb	Jeremy G.	Manutahi road	Tasman sea	Pacific	Oceania	New Zealand	NA	fluvial deposits	FALSE	FALSE	FALSE	FALSE	NA	NA	NA	28	45	28	125	weak	0.42	NA	NA	NA	NA	0.42	01/01/1874	1927-01-01	NA	53.03	historic maps	1.623	2.912	0.676	8.477	11.068	1.501	21.9099	2.75	15.288	2.19	1312	47.6	12.4833	8.8
Rates of coastal erosion and accretion in New Zealand	1978-01-12	N.Z. Journal of marine and freshwater research	NA	Gibb	Jeremy G.	Giggs Trig	Tasman sea	Pacific	Oceania	New Zealand	NA	fluvial deposits	FALSE	FALSE	FALSE	FALSE	NA	NA	NA	62.5	95	62.5	125	weak	0.6	NA	NA	NA	NA	0.6	1908-01-01	1958-01-01	NA	50.04	historic maps	2.083	3.69	0.848	8.614	11.274	1.479	36.6729	2.5	17.586	2.342	1312	47.6	12.4833	8.8
Rates of coastal erosion and accretion in New Zealand	1978-01-12	N.Z. Journal of marine and freshwater research	NA	Gibb	Jeremy G.	Hauroto road	Tasman sea	Pacific	Oceania	New Zealand	NA	fluvial deposits	FALSE	FALSE	FALSE	FALSE	NA	NA	NA	45	68	45	125	weak	0.32	NA	NA	NA	NA	0.32	1902-01-01	1930-01-01	NA	28.02	historic maps	2.083	3.69	0.848	8.614	11.274	1.479	36.6729	2.5	17.586	2.342	1312	47.6	12.4833	8.8
Rates of coastal erosion and accretion in New Zealand	1978-01-12	N.Z. Journal of marine and freshwater research	NA	Gibb	Jeremy G.	Ohawe beach	Tasman sea	Pacific	Oceania	New Zealand	NA	fluvial deposits	FALSE	FALSE	FALSE	FALSE	NA	NA	NA	25	48	25	125	weak	0.63	NA	NA	NA	NA	0.63	01/01/1871	1966-01-01	NA	95.06	historic maps	2.083	3.69	0.848	8.614	11.274	1.479	36.6729	2.5	17.586	2.342	1312	47.6	12.4833	8.8
Rates of coastal erosion and accretion in New Zealand	1978-01-12	N.Z. Journal of marine and freshwater research	NA	Gibb	Jeremy G.	Ohawe beach 2	Tasman sea	Pacific	Oceania	New Zealand	NA	fluvial deposits	FALSE	FALSE	FALSE	FALSE	NA	NA	NA	21.6	44	21.6	125	weak	0.58	NA	NA	NA	NA	0.58	01/01/1871	1959-01-01	NA	88.06	historic maps	2.083	3.69	0.848	8.614	11.274	1.479	36.6729	2.5	17.586	2.342	1312	47.6	12.4833	8.8
Rates of coastal erosion and accretion in New Zealand	1978-01-12	N.Z. Journal of marine and freshwater research	NA	Gibb	Jeremy G.	Ohawe beach 2	Tasman sea	Pacific	Oceania	New Zealand	NA	fluvial deposits	FALSE	FALSE	FALSE	FALSE	NA	NA	NA	21.6	44	21.6	125	weak	1.29	NA	NA	NA	NA	1.29	1959-01-01	1966-01-01	NA	7.01	historic maps	2.083	3.69	0.848	8.614	11.274	1.479	36.6729	2.5	17.586	2.342	1312	47.6	12.4833	8.8
Rates of coastal erosion and accretion in New Zealand	1978-01-12	N.Z. Journal of marine and freshwater research	NA	Gibb	Jeremy G.	Maine Road	Tasman sea	Pacific	Oceania	New Zealand	NA	fluvial deposits	FALSE	FALSE	FALSE	FALSE	NA	NA	NA	26.1	41	26.1	125	weak	1.11	NA	NA	NA	NA	1.11	1940-01-01	1976-01-01	NA	36.02	survey	2.083	3.69	0.848	8.614	11.274	1.479	36.6729	2.5	17.586	2.381	1312	47.6	12.4833	8.8
Rates of coastal erosion and accretion in New Zealand	1978-01-12	N.Z. Journal of marine and freshwater research	NA	Gibb	Jeremy G.	Winks trig	Tasman sea	Pacific	Oceania	New Zealand	NA	Lahar deposits	FALSE	FALSE	FALSE	FALSE	NA	NA	NA	36.8	52	36.8	125	weak	0.34	NA	NA	NA	NA	0.34	01/01/1872	1976-01-01	NA	104.07	historic maps	2.083	3.69	0.848	8.614	11.274	1.479	36.6729	2.5	17.586	2.381	1312	47.6	12.4833	8.8
Rates of coastal erosion and accretion in New Zealand	1978-01-12	N.Z. Journal of marine and freshwater research	NA	Gibb	Jeremy G.	Normanby road	Tasman sea	Pacific	Oceania	New Zealand	NA	Lahar deposits	FALSE	FALSE	FALSE	FALSE	NA	NA	NA	34.1	47	34.1	125	weak	0.16	NA	NA	NA	NA	0.16	01/01/1879	1930-01-01	NA	51.03	historic maps	2.083	3.69	0.848	8.614	11.274	1.479	36.6729	2.5	17.586	2.381	1312	47.6	12.4833	8.8
Rates of coastal erosion and accretion in New Zealand	1978-01-12	N.Z. Journal of marine and freshwater research	NA	Gibb	Jeremy G.	Glen road	Tasman sea	Pacific	Oceania	New Zealand	NA	Lahar deposits	FALSE	FALSE	FALSE	FALSE	NA	NA	NA	34.2	46	34.2	125	weak	0.001	NA	NA	NA	NA	0.001	1912-01-01	1947-01-01	NA	35.02	historic maps	2.083	3.69	0.848	8.614	11.274	1.479	36.6729	2.5	17.586	2.381	1312	47.6	12.4833	8.8
Rates of coastal erosion and accretion in New Zealand	1978-01-12	N.Z. Journal of marine and freshwater research	NA	Gibb	Jeremy G.	Pihama	Tasman sea	Pacific	Oceania	New Zealand	NA	Lahar deposits	FALSE	FALSE	FALSE	FALSE	NA	NA	NA	18.5	31	18.5	125	weak	0.001	NA	NA	NA	NA	0.001	1920-01-01	1976-01-01	NA	56.04	historic maps	2.083	3.69	0.848	8.614	11.274	1.479	36.6729	2.5	17.586	2.499	1400	45.8	12.9167	8.7
Rates of coastal erosion and accretion in New Zealand	1978-01-12	N.Z. Journal of marine and freshwater research	NA	Gibb	Jeremy G.	Punehu	Tasman sea	Pacific	Oceania	New Zealand	NA	Lahar deposits	FALSE	FALSE	FALSE	FALSE	NA	NA	NA	14.1	26	14.1	125	weak	0.09	NA	NA	NA	NA	0.09	1920-01-01	1976-01-01	NA	56.04	historic maps	2.083	3.69	0.848	8.614	11.274	1.479	36.6729	2.5	17.586	2.499	1400	45.8	12.9167	8.7
Rates of coastal erosion and accretion in New Zealand	1978-01-12	N.Z. Journal of marine and freshwater research	NA	Gibb	Jeremy G.	Harekawe stream	Tasman sea	Pacific	Oceania	New Zealand	NA	Lahar deposits	FALSE	FALSE	FALSE	FALSE	NA	NA	NA	23.8	46	23.8	227	weak	0.001	NA	NA	NA	NA	0.001	1925-01-01	1975-01-01	NA	50.03	historic maps	2.239	3.944	0.896	9.198	11.913	1.535	45.2443	2.5	16.384	2.471	1856	47.2	11.9917	8.9
Rates of coastal erosion and accretion in New Zealand	1978-01-12	N.Z. Journal of marine and freshwater research	NA	Gibb	Jeremy G.	New Plymouth	Tasman sea	Pacific	Oceania	New Zealand	NA	Lahar deposits	FALSE	FALSE	FALSE	FALSE	NA	NA	NA	18.4	29	18.4	227	weak	0.17	NA	NA	NA	NA	0.17	01/01/1842	1901-01-01	NA	59.04	historic maps	2.239	3.944	0.896	9.198	11.913	1.535	45.2443	2.5	16.384	2.476	1856	47.2	11.9917	8.9
Rates of coastal erosion and accretion in New Zealand	1978-01-12	N.Z. Journal of marine and freshwater research	NA	Gibb	Jeremy G.	New Plymouth	Tasman sea	Pacific	Oceania	New Zealand	NA	Lahar deposits	FALSE	FALSE	FALSE	FALSE	NA	NA	NA	18.4	29	18.4	227	weak	0.5	NA	NA	NA	NA	0.5	1901-01-01	1921-01-01	NA	20.01	historic maps	2.239	3.944	0.896	9.198	11.913	1.535	45.2443	2.5	16.384	2.476	1856	47.2	11.9917	8.9
Rates of coastal erosion and accretion in New Zealand	1978-01-12	N.Z. Journal of marine and freshwater research	NA	Gibb	Jeremy G.	New Plymouth	Tasman sea	Pacific	Oceania	New Zealand	NA	Lahar deposits	FALSE	FALSE	FALSE	FALSE	NA	NA	NA	18.4	29	18.4	227	weak	0.39	NA	NA	NA	NA	0.39	1921-01-01	1944-01-01	NA	23.01	historic maps	2.239	3.944	0.896	9.198	11.913	1.535	45.2443	2.5	16.384	2.476	1856	47.2	11.9917	8.9
Rates of coastal erosion and accretion in New Zealand	1978-01-12	N.Z. Journal of marine and freshwater research	NA	Gibb	Jeremy G.	Wills road	Tasman sea	Pacific	Oceania	New Zealand	NA	Lahar deposits	FALSE	FALSE	FALSE	FALSE	NA	NA	NA	14.5	24	14.5	227	weak	0.25	NA	NA	NA	NA	0.25	01/01/1852	1945-01-01	NA	93.06	historic maps	2.239	3.944	0.896	9.198	11.913	1.535	45.2443	2.5	16.384	2.476	1856	47.2	11.9917	8.9
Rates of coastal erosion and accretion in New Zealand	1978-01-12	N.Z. Journal of marine and freshwater research	NA	Gibb	Jeremy G.	Wills road	Tasman sea	Pacific	Oceania	New Zealand	NA	Lahar deposits	FALSE	FALSE	FALSE	FALSE	NA	NA	NA	14.5	24	14.5	227	weak	2.38	NA	NA	NA	NA	2.38	1945-01-01	1950-01-01	NA	5	aerial photography	2.239	3.944	0.896	9.198	11.913	1.535	45.2443	2.5	16.384	2.476	1856	47.2	11.9917	8.9
Rates of coastal erosion and accretion in New Zealand	1978-01-12	N.Z. Journal of marine and freshwater research	NA	Gibb	Jeremy G.	Wills road	Tasman sea	Pacific	Oceania	New Zealand	NA	Lahar deposits	FALSE	FALSE	FALSE	FALSE	NA	NA	NA	14.5	24	14.5	227	weak	0.001	NA	NA	NA	NA	0.001	1950-01-01	1957-01-01	NA	7.01	aerial photography	2.239	3.944	0.896	9.198	11.913	1.535	45.2443	2.5	16.384	2.476	1856	47.2	11.9917	8.9
Rates of coastal erosion and accretion in New Zealand	1978-01-12	N.Z. Journal of marine and freshwater research	NA	Gibb	Jeremy G.	Wills road	Tasman sea	Pacific	Oceania	New Zealand	NA	Lahar deposits	FALSE	FALSE	FALSE	FALSE	NA	NA	NA	14.5	24	14.5	227	weak	0.69	NA	NA	NA	NA	0.69	1957-01-01	1970-01-01	NA	13.01	aerial photography	2.239	3.944	0.896	9.198	11.913	1.535	45.2443	2.5	16.384	2.476	1856	47.2	11.9917	8.9
Rates of coastal erosion and accretion in New Zealand	1978-01-12	N.Z. Journal of marine and freshwater research	NA	Gibb	Jeremy G.	Wills road	Tasman sea	Pacific	Oceania	New Zealand	NA	Lahar deposits	FALSE	FALSE	FALSE	FALSE	NA	NA	NA	14.5	24	14.5	227	weak	0.15	NA	NA	NA	NA	0.15	1970-01-01	1976-01-01	NA	6	aerial photography	2.239	3.944	0.896	9.198	11.913	1.535	45.2443	2.5	16.384	2.476	1856	47.2	11.9917	8.9
Rates of coastal erosion and accretion in New Zealand	1978-01-12	N.Z. Journal of marine and freshwater research	NA	Gibb	Jeremy G.	Puketapu trig	Tasman sea	Pacific	Oceania	New Zealand	NA	Lahar deposits	TRUE	FALSE	FALSE	FALSE	NA	NA	NA	15	23	15	227	weak	0.71	NA	NA	NA	NA	0.71	1917-01-01	1945-01-01	NA	28.02	historic maps	2.239	3.944	0.896	9.198	11.913	1.535	45.2443	2.5	16.384	2.476	1856	47.2	11.9917	8.9
Rates of coastal erosion and accretion in New Zealand	1978-01-12	N.Z. Journal of marine and freshwater research	NA	Gibb	Jeremy G.	Puketapu trig	Tasman sea	Pacific	Oceania	New Zealand	NA	Lahar deposits	TRUE	FALSE	FALSE	FALSE	NA	NA	NA	15	23	15	227	weak	2.5	NA	NA	NA	NA	2.5	1945-01-01	1950-01-01	NA	5	aerial photography	2.239	3.944	0.896	9.198	11.913	1.535	45.2443	2.5	16.384	2.476	1856	47.2	11.9917	8.9
Rates of coastal erosion and accretion in New Zealand	1978-01-12	N.Z. Journal of marine and freshwater research	NA	Gibb	Jeremy G.	Puketapu trig	Tasman sea	Pacific	Oceania	New Zealand	NA	Lahar deposits	TRUE	FALSE	FALSE	FALSE	NA	NA	NA	15	23	15	227	weak	0.001	NA	NA	NA	NA	0.001	1950-01-01	1957-01-01	NA	7.01	aerial photography	2.239	3.944	0.896	9.198	11.913	1.535	45.2443	2.5	16.384	2.476	1856	47.2	11.9917	8.9
Rates of coastal erosion and accretion in New Zealand	1978-01-12	N.Z. Journal of marine and freshwater research	NA	Gibb	Jeremy G.	Puketapu trig	Tasman sea	Pacific	Oceania	New Zealand	NA	Lahar deposits	TRUE	FALSE	FALSE	FALSE	NA	NA	NA	15	23	15	227	weak	1.37	NA	NA	NA	NA	1.37	1957-01-01	1964-01-01	NA	7	historic maps	2.239	3.944	0.896	9.198	11.913	1.535	45.2443	2.5	16.384	2.476	1856	47.2	11.9917	8.9
Rates of coastal erosion and accretion in New Zealand	1978-01-12	N.Z. Journal of marine and freshwater research	NA	Gibb	Jeremy G.	Puketapu trig	Tasman sea	Pacific	Oceania	New Zealand	NA	Lahar deposits	TRUE	FALSE	FALSE	FALSE	NA	NA	NA	15	23	15	227	weak	0.41	NA	NA	NA	NA	0.41	1964-01-01	1970-01-01	NA	6.01	aerial photography	2.239	3.944	0.896	9.198	11.913	1.535	45.2443	2.5	16.384	2.476	1856	47.2	11.9917	8.9
Rates of coastal erosion and accretion in New Zealand	1978-01-12	N.Z. Journal of marine and freshwater research	NA	Gibb	Jeremy G.	Puketapu trig	Tasman sea	Pacific	Oceania	New Zealand	NA	Lahar deposits	TRUE	FALSE	FALSE	FALSE	NA	NA	NA	15	23	15	227	weak	0.07	NA	NA	NA	NA	0.07	1970-01-01	1976-01-01	NA	6	aerial photography	2.239	3.944	0.896	9.198	11.913	1.535	45.2443	2.5	16.384	2.476	1856	47.2	11.9917	8.9
Rates of coastal erosion and accretion in New Zealand	1978-01-12	N.Z. Journal of marine and freshwater research	NA	Gibb	Jeremy G.	Airport	Tasman sea	Pacific	Oceania	New Zealand	NA	Lahar deposits	FALSE	FALSE	FALSE	FALSE	NA	NA	NA	24.9	32	24.9	227	weak	0.96	NA	NA	NA	NA	0.96	1917-01-01	1964-01-01	NA	47.03	survey	2.239	3.944	0.896	9.198	11.913	1.535	45.2443	2.5	16.384	2.476	1856	47.2	11.9917	8.9
Rates of coastal erosion and accretion in New Zealand	1978-01-12	N.Z. Journal of marine and freshwater research	NA	Gibb	Jeremy G.	Airport2	Tasman sea	Pacific	Oceania	New Zealand	NA	Lahar deposits	FALSE	FALSE	FALSE	FALSE	NA	NA	NA	16.3	26	16.3	227	weak	0.32	NA	NA	NA	NA	0.32	1917-01-01	1964-01-01	NA	47.03	historic maps	2.239	3.944	0.896	9.198	11.913	1.535	45.2443	2.5	16.384	2.476	1357	37.4	13.4417	9
Rates of coastal erosion and accretion in New Zealand	1978-01-12	N.Z. Journal of marine and freshwater research	NA	Gibb	Jeremy G.	Oamaru	Tasman sea	Pacific	Oceania	New Zealand	NA	glaciofluvial	FALSE	FALSE	FALSE	FALSE	NA	NA	NA	11.6	17	11.6	26	weak	0.65	NA	NA	NA	NA	0.65	01/01/1861	1939-01-01	NA	78.05	historic maps	1.737	3.033	0.659	8.818	11.247	1.428	26.1055	2.5	17.052	1.405	564	108.3	9.45833	9.7
Rates of coastal erosion and accretion in New Zealand	1978-01-12	N.Z. Journal of marine and freshwater research	NA	Gibb	Jeremy G.	Oamaru	Tasman sea	Pacific	Oceania	New Zealand	NA	glaciofluvial	FALSE	FALSE	FALSE	FALSE	NA	NA	NA	11.6	17	11.6	26	weak	1.42	NA	NA	NA	NA	1.42	1939-01-01	1945-01-01	NA	6.01	historic maps	1.737	3.033	0.659	8.818	11.247	1.428	26.1055	2.5	17.052	1.405	564	108.3	9.45833	9.7
Rates of coastal erosion and accretion in New Zealand	1978-01-12	N.Z. Journal of marine and freshwater research	NA	Gibb	Jeremy G.	Oamaru	Tasman sea	Pacific	Oceania	New Zealand	NA	glaciofluvial	FALSE	FALSE	FALSE	FALSE	NA	NA	NA	11.6	17	11.6	26	weak	0.23	NA	NA	NA	NA	0.23	1945-01-01	1954-01-01	NA	9.01	historic maps	1.737	3.033	0.659	8.818	11.247	1.428	26.1055	2.5	17.052	1.405	564	108.3	9.45833	9.7
Rates of coastal erosion and accretion in New Zealand	1978-01-12	N.Z. Journal of marine and freshwater research	NA	Gibb	Jeremy G.	Oamaru	Tasman sea	Pacific	Oceania	New Zealand	NA	glaciofluvial	FALSE	FALSE	FALSE	FALSE	NA	NA	NA	11.6	17	11.6	26	weak	0.42	NA	NA	NA	NA	0.42	1954-01-01	1959-01-01	NA	5	historic maps	1.737	3.033	0.659	8.818	11.247	1.428	26.1055	2.5	17.052	1.405	564	108.3	9.45833	9.7
Rates of coastal erosion and accretion in New Zealand	1978-01-12	N.Z. Journal of marine and freshwater research	NA	Gibb	Jeremy G.	Oamaru	Tasman sea	Pacific	Oceania	New Zealand	NA	glaciofluvial	FALSE	FALSE	FALSE	FALSE	NA	NA	NA	11.6	17	11.6	26	weak	0.06	NA	NA	NA	NA	0.06	1959-01-01	1964-01-01	NA	5	historic maps	1.737	3.033	0.659	8.818	11.247	1.428	26.1055	2.5	17.052	1.405	564	108.3	9.45833	9.7
Rates of coastal erosion and accretion in New Zealand	1978-01-12	N.Z. Journal of marine and freshwater research	NA	Gibb	Jeremy G.	Oamaru	Tasman sea	Pacific	Oceania	New Zealand	NA	glaciofluvial	FALSE	FALSE	FALSE	FALSE	NA	NA	NA	11.6	17	11.6	26	weak	0.1	NA	NA	NA	NA	0.1	1964-01-01	1967-01-01	NA	3	historic maps	1.737	3.033	0.659	8.818	11.247	1.428	26.1055	2.5	17.052	1.405	564	108.3	9.45833	9.7
Rates of coastal erosion and accretion in New Zealand	1978-01-12	N.Z. Journal of marine and freshwater research	NA	Gibb	Jeremy G.	Oamaru	Tasman sea	Pacific	Oceania	New Zealand	NA	glaciofluvial	FALSE	FALSE	FALSE	FALSE	NA	NA	NA	11.6	17	11.6	26	weak	0.1	NA	NA	NA	NA	0.1	1967-01-01	1970-01-01	NA	3	historic maps	1.737	3.033	0.659	8.818	11.247	1.428	26.1055	2.5	17.052	1.405	564	108.3	9.45833	9.7
Rates of coastal erosion and accretion in New Zealand	1978-01-12	N.Z. Journal of marine and freshwater research	NA	Gibb	Jeremy G.	Oamaru	Tasman sea	Pacific	Oceania	New Zealand	NA	glaciofluvial	FALSE	FALSE	FALSE	FALSE	NA	NA	NA	11.6	17	11.6	26	weak	0.18	NA	NA	NA	NA	0.18	1970-01-01	1971-01-01	NA	1	historic maps	1.737	3.033	0.659	8.818	11.247	1.428	26.1055	2.5	17.052	1.405	564	108.3	9.45833	9.7
Rates of coastal erosion and accretion in New Zealand	1978-01-12	N.Z. Journal of marine and freshwater research	NA	Gibb	Jeremy G.	Oamaru	Tasman sea	Pacific	Oceania	New Zealand	NA	glaciofluvial	FALSE	FALSE	FALSE	FALSE	NA	NA	NA	11.6	17	11.6	26	weak	0.29	NA	NA	NA	NA	0.29	1971-01-01	1973-01-01	NA	2	historic maps	1.737	3.033	0.659	8.818	11.247	1.428	26.1055	2.5	17.052	1.405	564	108.3	9.45833	9.7
Rates of coastal erosion and accretion in New Zealand	1978-01-12	N.Z. Journal of marine and freshwater research	NA	Gibb	Jeremy G.	Oamaru	Tasman sea	Pacific	Oceania	New Zealand	NA	glaciofluvial	FALSE	FALSE	FALSE	FALSE	NA	NA	NA	11.6	17	11.6	26	weak	0.47	NA	NA	NA	NA	0.47	1973-01-01	1974-01-01	NA	1	historic maps	1.737	3.033	0.659	8.818	11.247	1.428	26.1055	2.5	17.052	1.405	564	108.3	9.45833	9.7
Rates of coastal erosion and accretion in New Zealand	1978-01-12	N.Z. Journal of marine and freshwater research	NA	Gibb	Jeremy G.	Oamaru	Tasman sea	Pacific	Oceania	New Zealand	NA	glaciofluvial	FALSE	FALSE	FALSE	FALSE	NA	NA	NA	11.6	17	11.6	26	weak	1.07	NA	NA	NA	NA	1.07	1974-01-01	1976-01-01	NA	2	historic maps	1.737	3.033	0.659	8.818	11.247	1.428	26.1055	2.5	17.052	1.405	564	108.3	9.45833	9.7
Rates of coastal erosion and accretion in New Zealand	1978-01-12	N.Z. Journal of marine and freshwater research	NA	Gibb	Jeremy G.	Oamaru2	Tasman sea	Pacific	Oceania	New Zealand	NA	glaciofluvial	FALSE	FALSE	FALSE	FALSE	NA	NA	NA	11.6	17	11.6	26	weak	0.46	NA	NA	NA	NA	0.46	01/01/1861	1939-01-01	NA	78.05	historic maps	1.737	3.033	0.659	8.818	11.247	1.428	26.1055	2.5	17.052	1.405	564	108.3	9.45833	9.7
Rates of coastal erosion and accretion in New Zealand	1978-01-12	N.Z. Journal of marine and freshwater research	NA	Gibb	Jeremy G.	Oamaru2	Tasman sea	Pacific	Oceania	New Zealand	NA	glaciofluvial	FALSE	FALSE	FALSE	FALSE	NA	NA	NA	11.6	17	11.6	26	weak	1.37	NA	NA	NA	NA	1.37	1939-01-01	1945-01-01	NA	6.01	historic maps	1.737	3.033	0.659	8.818	11.247	1.428	26.1055	2.5	17.052	1.405	564	108.3	9.45833	9.7
Rates of coastal erosion and accretion in New Zealand	1978-01-12	N.Z. Journal of marine and freshwater research	NA	Gibb	Jeremy G.	Oamaru2	Tasman sea	Pacific	Oceania	New Zealand	NA	glaciofluvial	FALSE	FALSE	FALSE	FALSE	NA	NA	NA	11.6	17	11.6	26	weak	0.91	NA	NA	NA	NA	0.91	1945-01-01	1954-01-01	NA	9.01	historic maps	1.737	3.033	0.659	8.818	11.247	1.428	26.1055	2.5	17.052	1.405	564	108.3	9.45833	9.7
Rates of coastal erosion and accretion in New Zealand	1978-01-12	N.Z. Journal of marine and freshwater research	NA	Gibb	Jeremy G.	Oamaru2	Tasman sea	Pacific	Oceania	New Zealand	NA	glaciofluvial	FALSE	FALSE	FALSE	FALSE	NA	NA	NA	11.6	17	11.6	26	weak	0.68	NA	NA	NA	NA	0.68	1954-01-01	1959-01-01	NA	5	historic maps	1.737	3.033	0.659	8.818	11.247	1.428	26.1055	2.5	17.052	1.405	564	108.3	9.45833	9.7
Rates of coastal erosion and accretion in New Zealand	1978-01-12	N.Z. Journal of marine and freshwater research	NA	Gibb	Jeremy G.	Oamaru2	Tasman sea	Pacific	Oceania	New Zealand	NA	glaciofluvial	FALSE	FALSE	FALSE	FALSE	NA	NA	NA	11.6	17	11.6	26	weak	0.12	NA	NA	NA	NA	0.12	1959-01-01	1964-01-01	NA	5	historic maps	1.737	3.033	0.659	8.818	11.247	1.428	26.1055	2.5	17.052	1.405	564	108.3	9.45833	9.7
Rates of coastal erosion and accretion in New Zealand	1978-01-12	N.Z. Journal of marine and freshwater research	NA	Gibb	Jeremy G.	Oamaru2	Tasman sea	Pacific	Oceania	New Zealand	NA	glaciofluvial	FALSE	FALSE	FALSE	FALSE	NA	NA	NA	11.6	17	11.6	26	weak	0.1	NA	NA	NA	NA	0.1	1964-01-01	1967-01-01	NA	3	historic maps	1.737	3.033	0.659	8.818	11.247	1.428	26.1055	2.5	17.052	1.405	564	108.3	9.45833	9.7
Rates of coastal erosion and accretion in New Zealand	1978-01-12	N.Z. Journal of marine and freshwater research	NA	Gibb	Jeremy G.	Oamaru2	Tasman sea	Pacific	Oceania	New Zealand	NA	glaciofluvial	FALSE	FALSE	FALSE	FALSE	NA	NA	NA	11.6	17	11.6	26	weak	0.2	NA	NA	NA	NA	0.2	1967-01-01	1970-01-01	NA	3	historic maps	1.737	3.033	0.659	8.818	11.247	1.428	26.1055	2.5	17.052	1.405	564	108.3	9.45833	9.7
Rates of coastal erosion and accretion in New Zealand	1978-01-12	N.Z. Journal of marine and freshwater research	NA	Gibb	Jeremy G.	Oamaru2	Tasman sea	Pacific	Oceania	New Zealand	NA	glaciofluvial	FALSE	FALSE	FALSE	FALSE	NA	NA	NA	11.6	17	11.6	26	weak	0.18	NA	NA	NA	NA	0.18	1970-01-01	1971-01-01	NA	1	historic maps	1.737	3.033	0.659	8.818	11.247	1.428	26.1055	2.5	17.052	1.405	564	108.3	9.45833	9.7
Rates of coastal erosion and accretion in New Zealand	1978-01-12	N.Z. Journal of marine and freshwater research	NA	Gibb	Jeremy G.	Oamaru2	Tasman sea	Pacific	Oceania	New Zealand	NA	glaciofluvial	FALSE	FALSE	FALSE	FALSE	NA	NA	NA	11.6	17	11.6	26	weak	0.14	NA	NA	NA	NA	0.14	1971-01-01	1973-01-01	NA	2	historic maps	1.737	3.033	0.659	8.818	11.247	1.428	26.1055	2.5	17.052	1.405	564	108.3	9.45833	9.7
Rates of coastal erosion and accretion in New Zealand	1978-01-12	N.Z. Journal of marine and freshwater research	NA	Gibb	Jeremy G.	Oamaru2	Tasman sea	Pacific	Oceania	New Zealand	NA	glaciofluvial	FALSE	FALSE	FALSE	FALSE	NA	NA	NA	11.6	17	11.6	26	weak	0.93	NA	NA	NA	NA	0.93	1973-01-01	1974-01-01	NA	1	historic maps	1.737	3.033	0.659	8.818	11.247	1.428	26.1055	2.5	17.052	1.405	564	108.3	9.45833	9.7
Rates of coastal erosion and accretion in New Zealand	1978-01-12	N.Z. Journal of marine and freshwater research	NA	Gibb	Jeremy G.	Oamaru2	Tasman sea	Pacific	Oceania	New Zealand	NA	glaciofluvial	FALSE	FALSE	FALSE	FALSE	NA	NA	NA	11.6	17	11.6	26	weak	0.43	NA	NA	NA	NA	0.43	1974-01-01	1976-01-01	NA	2	historic maps	1.737	3.033	0.659	8.818	11.247	1.428	26.1055	2.5	17.052	1.405	564	108.3	9.45833	9.7
Rates of coastal erosion and accretion in New Zealand	1978-01-12	N.Z. Journal of marine and freshwater research	NA	Gibb	Jeremy G.	South waitaki fan 1	Tasman sea	Pacific	Oceania	New Zealand	NA	glaciofluvial	FALSE	FALSE	FALSE	FALSE	NA	NA	NA	20.1	28	20.1	26	weak	0.59	NA	NA	NA	NA	0.59	1955-01-01	1972-01-01	NA	17.01	aerial photography	1.737	3.033	0.659	8.818	11.247	1.428	26.1055	2.5	17.052	1.405	450	80.2	11.15	9.8
Rates of coastal erosion and accretion in New Zealand	1978-01-12	N.Z. Journal of marine and freshwater research	NA	Gibb	Jeremy G.	South waitaki fan 2	Tasman sea	Pacific	Oceania	New Zealand	NA	glaciofluvial	FALSE	FALSE	FALSE	FALSE	NA	NA	NA	17.6	25	17.6	26	weak	1.97	NA	NA	NA	NA	1.97	1955-01-01	1972-01-01	NA	17.01	aerial photography	1.737	3.033	0.659	8.818	11.247	1.428	26.1055	2.5	17.052	1.411	450	80.2	11.15	9.8
Rates of coastal erosion and accretion in New Zealand	1978-01-12	N.Z. Journal of marine and freshwater research	NA	Gibb	Jeremy G.	South waitaki fan 3	Tasman sea	Pacific	Oceania	New Zealand	NA	glaciofluvial	FALSE	FALSE	FALSE	FALSE	NA	NA	NA	10.5	20	10.5	26	weak	1.55	NA	NA	NA	NA	1.55	1943-01-01	1969-01-01	NA	26.02	survey	1.737	3.033	0.659	8.818	11.247	1.428	26.1055	2.5	17.052	1.411	534	93.4	10.9583	10.6
Rates of coastal erosion and accretion in New Zealand	1978-01-12	N.Z. Journal of marine and freshwater research	NA	Gibb	Jeremy G.	South waitaki fan 4	Tasman sea	Pacific	Oceania	New Zealand	NA	glaciofluvial	FALSE	FALSE	FALSE	FALSE	NA	NA	NA	5.8	11	5.8	26	weak	0.81	NA	NA	NA	NA	0.81	1943-01-01	1969-01-01	NA	26.02	aerial photography	1.737	3.033	0.659	8.818	11.247	1.428	26.1055	2.5	17.052	1.411	534	93.4	10.9583	10.6
Rates of coastal erosion and accretion in New Zealand	1978-01-12	N.Z. Journal of marine and freshwater research	NA	Gibb	Jeremy G.	North waitaki fan 5	Tasman sea	Pacific	Oceania	New Zealand	NA	glaciofluvial	FALSE	FALSE	FALSE	FALSE	NA	NA	NA	12.9	20	12.9	26	weak	1.47	NA	NA	NA	NA	1.47	1943-01-01	1969-01-01	NA	26.02	survey	1.737	3.033	0.659	8.818	11.247	1.428	26.1055	2.5	17.052	1.427	534	93.4	10.9583	10.6
Rates of coastal erosion and accretion in New Zealand	1978-01-12	N.Z. Journal of marine and freshwater research	NA	Gibb	Jeremy G.	North waitaki fan 6	Tasman sea	Pacific	Oceania	New Zealand	NA	glaciofluvial	FALSE	FALSE	FALSE	FALSE	NA	NA	NA	11.4	18	11.4	26	weak	1.76	NA	NA	NA	NA	1.76	1943-01-01	1969-01-01	NA	26.02	survey	1.737	3.033	0.659	8.818	11.247	1.428	26.1055	2.5	17.052	1.427	534	93.4	10.9583	10.6
Rates of coastal erosion and accretion in New Zealand	1978-01-12	N.Z. Journal of marine and freshwater research	NA	Gibb	Jeremy G.	North waitaki fan 7	Tasman sea	Pacific	Oceania	New Zealand	NA	glaciofluvial	FALSE	FALSE	FALSE	FALSE	NA	NA	NA	8.7	14	8.7	26	weak	1.34	NA	NA	NA	NA	1.34	1943-01-01	1969-01-01	NA	26.02	survey	1.737	3.033	0.659	8.818	11.247	1.428	26.1055	2.5	17.052	1.427	534	93.4	10.9583	10.6
Rates of coastal erosion and accretion in New Zealand	1978-01-12	N.Z. Journal of marine and freshwater research	NA	Gibb	Jeremy G.	North waitaki fan 7	Tasman sea	Pacific	Oceania	New Zealand	NA	glaciofluvial	FALSE	FALSE	FALSE	FALSE	NA	NA	NA	8.7	14	8.7	26	weak	2.59	NA	NA	NA	NA	2.59	1974-01-01	1977-01-01	NA	3	survey	1.737	3.033	0.659	8.818	11.247	1.428	26.1055	2.5	17.052	1.427	534	93.4	10.9583	10.6
Rates of coastal erosion and accretion in New Zealand	1978-01-12	N.Z. Journal of marine and freshwater research	NA	Gibb	Jeremy G.	North waitaki fan 8	Tasman sea	Pacific	Oceania	New Zealand	NA	glaciofluvial	FALSE	FALSE	FALSE	FALSE	NA	NA	NA	6.7	10	6.7	26	weak	0.38	NA	NA	NA	NA	0.38	1943-01-01	1969-01-01	NA	26.02	survey	1.737	3.033	0.659	8.818	11.247	1.428	26.1055	2.5	17.052	1.427	534	93.4	10.9583	10.6
Rates of coastal erosion and accretion in New Zealand	1978-01-12	N.Z. Journal of marine and freshwater research	NA	Gibb	Jeremy G.	St Andrews	Tasman sea	Pacific	Oceania	New Zealand	NA	glaciofluvial	FALSE	FALSE	FALSE	FALSE	NA	NA	NA	4.5	5	4.5	26	weak	0.25	NA	NA	NA	NA	0.25	01/01/1877	1957-01-01	NA	80.05	NA	1.737	3.033	0.659	8.818	11.247	1.428	26.1055	2.5	17.052	1.503	534	93.4	10.9583	10.6
Rates of coastal erosion and accretion in New Zealand	1978-01-12	N.Z. Journal of marine and freshwater research	NA	Gibb	Jeremy G.	St Andrews	Tasman sea	Pacific	Oceania	New Zealand	NA	glaciofluvial	FALSE	FALSE	FALSE	FALSE	NA	NA	NA	4.5	5	4.5	26	weak	0.5	NA	NA	NA	NA	0.5	1957-01-01	1968-01-01	NA	11.01	aerial photography	1.737	3.033	0.659	8.818	11.247	1.428	26.1055	2.5	17.052	1.503	534	93.4	10.9583	10.6
Rates of coastal erosion and accretion in New Zealand	1978-01-12	N.Z. Journal of marine and freshwater research	NA	Gibb	Jeremy G.	North Orari	Tasman sea	Pacific	Oceania	New Zealand	NA	glaciofluvial	FALSE	FALSE	FALSE	FALSE	NA	NA	NA	4.8	7	4.8	61	weak	0.86	NA	NA	NA	NA	0.86	1900-01-01	1958-01-01	NA	58.04	aerial photography	1.85	3.197	0.697	8.854	11.417	1.477	29.7334	2.5	17.185	1.892	515	109.9	10.7583	10.7
Rates of coastal erosion and accretion in New Zealand	1978-01-12	N.Z. Journal of marine and freshwater research	NA	Gibb	Jeremy G.	North Orari	Tasman sea	Pacific	Oceania	New Zealand	NA	glaciofluvial	FALSE	FALSE	FALSE	FALSE	NA	NA	NA	4.8	7	4.8	61	weak	0.35	NA	NA	NA	NA	0.35	1939-01-01	1967-01-01	NA	28.02	aerial photography	1.85	3.197	0.697	8.854	11.417	1.477	29.7334	2.5	17.185	1.892	515	109.9	10.7583	10.7
Rates of coastal erosion and accretion in New Zealand	1978-01-12	N.Z. Journal of marine and freshwater research	NA	Gibb	Jeremy G.	North Rangitata	Tasman sea	Pacific	Oceania	New Zealand	NA	glaciofluvial	FALSE	FALSE	FALSE	FALSE	NA	NA	NA	7.3	11	7.3	61	weak	0.27	NA	NA	NA	NA	0.27	1939-01-01	1961-01-01	NA	22.02	aerial photography	1.85	3.197	0.697	8.854	11.417	1.477	29.7334	2.5	17.185	1.892	629	80.3	11.5833	10.3
Rates of coastal erosion and accretion in New Zealand	1978-01-12	N.Z. Journal of marine and freshwater research	NA	Gibb	Jeremy G.	North Rangitata	Tasman sea	Pacific	Oceania	New Zealand	NA	glaciofluvial	FALSE	FALSE	FALSE	FALSE	NA	NA	NA	7.3	11	7.3	61	weak	0.44	NA	NA	NA	NA	0.44	1961-01-01	1977-01-01	NA	16.01	aerial photography	1.85	3.197	0.697	8.854	11.417	1.477	29.7334	2.5	17.185	1.892	629	80.3	11.5833	10.3
Rates of coastal erosion and accretion in New Zealand	1978-01-12	N.Z. Journal of marine and freshwater research	NA	Gibb	Jeremy G.	Beach Road	Tasman sea	Pacific	Oceania	New Zealand	NA	glaciofluvial	FALSE	FALSE	FALSE	FALSE	NA	NA	NA	7.3	11	7.3	61	weak	0.73	NA	NA	NA	NA	0.73	1939-01-01	1965-01-01	NA	26.02	aerial photography	1.85	3.197	0.697	8.854	11.417	1.477	29.7334	2.5	17.185	1.877	629	80.3	11.5833	10.3
Rates of coastal erosion and accretion in New Zealand	1978-01-12	N.Z. Journal of marine and freshwater research	NA	Gibb	Jeremy G.	Twentyone road	Tasman sea	Pacific	Oceania	New Zealand	NA	glaciofluvial	FALSE	FALSE	FALSE	FALSE	NA	NA	NA	5.9	10	5.9	61	weak	0.51	NA	NA	NA	NA	0.51	1939-01-01	1965-01-01	NA	26.02	aerial photography	1.85	3.197	0.697	8.854	11.417	1.477	29.7334	2.5	17.185	1.892	629	80.3	11.5833	10.3
Rates of coastal erosion and accretion in New Zealand	1978-01-12	N.Z. Journal of marine and freshwater research	NA	Gibb	Jeremy G.	North Hinds	Tasman sea	Pacific	Oceania	New Zealand	NA	glaciofluvial	FALSE	FALSE	FALSE	FALSE	NA	NA	NA	8.1	14	8.1	61	weak	0.23	NA	NA	NA	NA	0.23	1939-01-01	1965-01-01	NA	26.02	aerial photography	1.85	3.197	0.697	8.854	11.417	1.477	29.7334	2.5	17.185	1.892	629	80.3	11.5833	10.3
Rates of coastal erosion and accretion in New Zealand	1978-01-12	N.Z. Journal of marine and freshwater research	NA	Gibb	Jeremy G.	South ashburton	Tasman sea	Pacific	Oceania	New Zealand	NA	glaciofluvial	FALSE	FALSE	FALSE	FALSE	NA	NA	NA	12	20	12	61	weak	0.38	NA	NA	NA	NA	0.38	1941-01-01	1965-01-01	NA	24.02	aerial photography	1.85	3.197	0.697	8.854	11.417	1.477	29.7334	2.5	17.185	1.892	629	80.3	11.5833	10.3
Rates of coastal erosion and accretion in New Zealand	1978-01-12	N.Z. Journal of marine and freshwater research	NA	Gibb	Jeremy G.	North Ashburton	Tasman sea	Pacific	Oceania	New Zealand	NA	glaciofluvial	FALSE	FALSE	FALSE	FALSE	NA	NA	NA	13.2	20	13.2	61	weak	0.68	NA	NA	NA	NA	0.68	1941-01-01	1965-01-01	NA	24.02	aerial photography	1.85	3.197	0.697	8.854	11.417	1.477	29.7334	2.5	17.185	1.852	629	80.3	11.5833	10.3
Rates of coastal erosion and accretion in New Zealand	1978-01-12	N.Z. Journal of marine and freshwater research	NA	Gibb	Jeremy G.	Wakanui	Tasman sea	Pacific	Oceania	New Zealand	NA	glaciofluvial	FALSE	FALSE	FALSE	FALSE	NA	NA	NA	16.2	25	16.2	61	weak	0.84	NA	NA	NA	NA	0.84	1942-01-01	1976-01-01	NA	34.02	aerial photography	1.85	3.197	0.697	8.854	11.417	1.477	29.7334	2.5	17.185	1.83	629	80.3	11.5833	10.3
Rates of coastal erosion and accretion in New Zealand	1978-01-12	N.Z. Journal of marine and freshwater research	NA	Gibb	Jeremy G.	Seaview	Tasman sea	Pacific	Oceania	New Zealand	NA	glaciofluvial	FALSE	FALSE	FALSE	FALSE	NA	NA	NA	11.8	19	11.8	61	weak	0.69	NA	NA	NA	NA	0.69	1942-01-01	1976-01-01	NA	34.02	aerial photography	1.85	3.197	0.697	8.854	11.417	1.477	29.7334	2.5	17.185	1.83	629	80.3	11.5833	10.3
Rates of coastal erosion and accretion in New Zealand	1978-01-12	N.Z. Journal of marine and freshwater research	NA	Gibb	Jeremy G.	Seafield road	Tasman sea	Pacific	Oceania	New Zealand	NA	glaciofluvial	FALSE	FALSE	FALSE	FALSE	NA	NA	NA	13.4	21	13.4	61	weak	1.36	NA	NA	NA	NA	1.36	1942-01-01	1976-01-01	NA	34.02	aerial photography	1.85	3.197	0.697	8.854	11.417	1.477	29.7334	2.5	17.185	1.83	627	94.4	11.0083	10.9
Rates of coastal erosion and accretion in New Zealand	1978-01-12	N.Z. Journal of marine and freshwater research	NA	Gibb	Jeremy G.	Corbetts road	Tasman sea	Pacific	Oceania	New Zealand	NA	glaciofluvial	FALSE	FALSE	FALSE	FALSE	NA	NA	NA	14.5	21	14.5	61	weak	0.34	NA	NA	NA	NA	0.34	1942-01-01	1976-01-01	NA	34.02	aerial photography	1.85	3.197	0.697	8.854	11.417	1.477	29.7334	2.5	17.185	1.83	531	84.3	11.725	11
Rates of coastal erosion and accretion in New Zealand	1978-01-12	N.Z. Journal of marine and freshwater research	NA	Gibb	Jeremy G.	Kyle road	Tasman sea	Pacific	Oceania	New Zealand	NA	glaciofluvial	FALSE	FALSE	FALSE	FALSE	NA	NA	NA	13.2	19	13.2	61	weak	0.43	NA	NA	NA	NA	0.43	1942-01-01	1976-01-01	NA	34.02	aerial photography	1.85	3.197	0.697	8.854	11.417	1.477	29.7334	2.5	17.185	1.83	531	84.3	11.725	11
Estimating long-term cliff recession rates from shore platform widths	2005-01-08	Engineering Geology	10.1016/j.enggeo.2005.06.004	De Lange	Willem P.	North Shore	NA	Pacific	Oceania	New Zealand	NA	flysh	FALSE	FALSE	FALSE	FALSE	NA	NA	12	23.6	44	23.6	343	strong	0.008	NA	NA	NA	NA	0.008	1942-01-01	1976-01-01	7120	7120	geomorphology	1.459	2.551	0.56	8.01	10.88	1.528	16.7304	2.5	18.041	0.708	1052	14.2	15.0083	8.8
Estimating long-term cliff recession rates from shore platform widths	2005-01-08	Engineering Geology	10.1016/j.enggeo.2005.06.004	De Lange	Willem P.	North Shore	NA	Pacific	Oceania	New Zealand	NA	volcanic tuff	FALSE	FALSE	FALSE	FALSE	NA	NA	12	23.6	44	23.6	343	medium	0.008	NA	NA	NA	NA	0.008	1942-01-01	1976-01-01	7120	7120	geomorphology	1.459	2.551	0.56	8.01	10.88	1.528	16.7304	2.5	18.041	0.708	1052	14.2	15.0083	8.8
Estimating long-term cliff recession rates from shore platform widths	2005-01-08	Engineering Geology	10.1016/j.enggeo.2005.06.004	De Lange	Willem P.	Tawharanui Peninsula	NA	Pacific	Oceania	New Zealand	NA	flysh	FALSE	FALSE	FALSE	FALSE	10	3	NA	36	82	36	115	strong	0.005	NA	NA	NA	NA	0.005	1942-01-01	1976-01-01	7120	7120	geomorphology	1.459	2.551	0.56	8.01	10.88	1.528	16.7304	2.5	18.041	1.114	1174	6.4	15.2083	7.8
Terrestrial methods for monitoring cliff erosion in an urban environment	2004-01-06	Journal of Coastal Research	NA	Gulyaev	Sergei A.	North Shore	NA	Pacific	Oceania	New Zealand	20	flysh	FALSE	FALSE	FALSE	FALSE	NA	NA	40	23.4	46	23.4	306	strong	0.01	NA	NA	NA	NA	0.01	2001-06-05	2002-03-20	NA	0.79	Terrestrial laser scanning	1.459	2.551	0.56	8.01	10.88	1.528	16.7304	2.5	18.041	0.708	1052	14.2	15.0083	8.8
Terrestrial methods for monitoring cliff erosion in an urban environment	2004-01-06	Journal of Coastal Research	NA	Gulyaev	Sergei A.	North Shore	NA	Pacific	Oceania	New Zealand	20	flysh	FALSE	FALSE	FALSE	FALSE	NA	NA	40	23.4	46	23.4	306	strong	0.033	NA	NA	NA	NA	0.033	2002-03-20	2003-06-18	NA	1.25	Terrestrial laser scanning	1.459	2.551	0.56	8.01	10.88	1.528	16.7304	2.5	18.041	0.708	1052	14.2	15.0083	8.8
Terrestrial methods for monitoring cliff erosion in an urban environment	2004-01-06	Journal of Coastal Research	NA	Gulyaev	Sergei A.	North Shore	NA	Pacific	Oceania	New Zealand	20	flysh	FALSE	FALSE	FALSE	FALSE	NA	NA	40	23.4	46	23.4	306	strong	0.024	NA	NA	NA	NA	0.024	2001-06-05	2003-06-18	NA	2.04	Terrestrial laser scanning	1.459	2.551	0.56	8.01	10.88	1.528	16.7304	2.5	18.041	0.708	1052	14.2	15.0083	8.8
Coastal cliff geometry derived from structure-from-motion photogrammetry at Stara Ba<U+009A>ka, Krk Island, Croatia	2014-12-01	Geo-Marine Letters	10.1007/s00367-014-0380-4	Ru<U+009E>ic	Igor	Stara Baska	Mediterranean	NA	Europe	Croatia	500	conglomerate	FALSE	FALSE	TRUE	FALSE	NA	NA	5	20.5	36	20.5	104	weak	NA	5	NA	NA	NA	0.13151	1966-01-01	2004-01-01	NA	38.02	aerial photography (orthorectified)	0.291	0.824	0.267	3.072	4.832	0.927	0.255252	2.5	17.319	0.227	1018	52.7	11.3417	18.9
Coastal erosion hazards in Santa Cruz and San Diego Counties, California	1999-01-01	Journal of Coastal Research	NA	Moore	Laura J.	San Lorenzo River Mouth to Soquel Point	NA	Pacific	America	USA	NA	sandstone, siltstone	FALSE	TRUE	FALSE	FALSE	8	6	NA	6.3	9	6.3	103	strong	0.08	NA	NA	NA	NA	0.08	1953-01-01	1994-01-01	NA	41.03	aerial photography	1.931	3.191	0.654	10.126	12.909	1.576	37.048	3	11.493	1.323	314	17.5	13.85	9.1
Coastal erosion hazards in Santa Cruz and San Diego Counties, California	1999-01-01	Journal of Coastal Research	NA	Moore	Laura J.	Opal cliff - Capitola	NA	Pacific	America	USA	NA	sandstone, siltstone	TRUE	FALSE	FALSE	FALSE	20	7	NA	12	14	12	49	strong	0.13	NA	NA	NA	NA	0.13	1953-01-01	1994-01-01	NA	41.03	aerial photography	1.931	3.191	0.654	10.126	12.909	1.576	37.048	3	11.493	1.323	314	17.5	13.85	9.1
Coastal erosion hazards in Santa Cruz and San Diego Counties, California	1999-01-01	Journal of Coastal Research	NA	Moore	Laura J.	Capitola - New Bringhton	NA	Pacific	America	USA	NA	sandstone, siltstone	TRUE	FALSE	FALSE	FALSE	NA	NA	25	24.9	37	24.9	63	strong	0.14	NA	NA	NA	NA	0.14	1953-01-01	1994-01-01	NA	41.03	aerial photography	1.931	3.191	0.654	10.126	12.909	1.576	37.048	3	11.493	1.323	314	17.5	13.85	9.1
Coastal erosion hazards in Santa Cruz and San Diego Counties, California	1999-01-01	Journal of Coastal Research	NA	Moore	Laura J.	New Bringhton - Aptos Scape	NA	Pacific	America	USA	NA	sandstone, siltstone	FALSE	FALSE	FALSE	FALSE	NA	NA	30	32.4	59	32.4	103	strong	0.1	NA	NA	NA	NA	0.1	1953-01-01	1994-01-01	NA	41.03	aerial photography	1.931	3.191	0.654	10.126	12.909	1.576	37.048	3	11.493	1.325	314	17.5	13.85	9.1
Coastal erosion hazards in Santa Cruz and San Diego Counties, California	1999-01-01	Journal of Coastal Research	NA	Moore	Laura J.	Carlsbad State Beach	NA	Pacific	America	USA	NA	sandstone	FALSE	FALSE	FALSE	FALSE	20	10	NA	12.7	19	12.7	144	strong	0.2	NA	NA	NA	NA	0.2	1956-01-01	1994-01-01	NA	38.03	aerial photography	1.266	1.887	0.338	10.304	12.628	1.39	16.2045	2.75	12.989	1.215	287	14.7	16.5917	11.6
Coastal erosion hazards in Santa Cruz and San Diego Counties, California	1999-01-01	Journal of Coastal Research	NA	Moore	Laura J.	Carlsbad State Beach	NA	Pacific	America	USA	NA	fluvial deposits	FALSE	FALSE	FALSE	FALSE	20	10	NA	12.7	19	12.7	144	weak	0.2	NA	NA	NA	NA	0.2	1956-01-01	1994-01-01	NA	38.03	aerial photography	1.266	1.887	0.338	10.304	12.628	1.39	16.2045	2.75	12.989	1.215	287	14.7	16.5917	11.6
Coastal erosion hazards in Santa Cruz and San Diego Counties, California	1999-01-01	Journal of Coastal Research	NA	Moore	Laura J.	Carlsbad south	NA	Pacific	America	USA	NA	sandstone	FALSE	FALSE	FALSE	FALSE	20	3	NA	14.7	22	14.7	154	strong	0.2	NA	NA	NA	NA	0.2	1952-01-01	1994-01-01	NA	42.03	aerial photography	1.266	1.887	0.338	10.304	12.628	1.39	16.2045	2.75	12.989	1.215	287	14.7	16.5917	11.6
Coastal erosion hazards in Santa Cruz and San Diego Counties, California	1999-01-01	Journal of Coastal Research	NA	Moore	Laura J.	Carlsbad south	NA	Pacific	America	USA	NA	fluvial deposits	FALSE	FALSE	FALSE	FALSE	20	3	NA	14.7	22	14.7	154	weak	0.2	NA	NA	NA	NA	0.2	1952-01-01	1994-01-01	NA	42.03	aerial photography	1.266	1.887	0.338	10.304	12.628	1.39	16.2045	2.75	12.989	1.215	287	14.7	16.5917	11.6
Coastal erosion hazards in Santa Cruz and San Diego Counties, California	1999-01-01	Journal of Coastal Research	NA	Moore	Laura J.	Encinitas	NA	Pacific	America	USA	NA	sandstone	FALSE	FALSE	FALSE	FALSE	NA	NA	NA	27.6	53	27.6	175	strong	0.1	NA	NA	NA	NA	0.1	1932-01-01	1994-01-01	NA	62.04	aerial photography	1.266	1.887	0.338	10.304	12.628	1.39	16.2045	2.75	12.989	1.215	287	14.7	16.5917	11.6
Coastal erosion hazards in Santa Cruz and San Diego Counties, California	1999-01-01	Journal of Coastal Research	NA	Moore	Laura J.	Encinitas	NA	Pacific	America	USA	NA	fluvial deposits	FALSE	FALSE	FALSE	FALSE	NA	NA	NA	27.6	53	27.6	175	weak	0.1	NA	NA	NA	NA	0.1	1932-01-01	1994-01-01	NA	62.04	aerial photography	1.266	1.887	0.338	10.304	12.628	1.39	16.2045	2.75	12.989	1.215	287	14.7	16.5917	11.6
Coastal erosion hazards in Santa Cruz and San Diego Counties, California	1999-01-01	Journal of Coastal Research	NA	Moore	Laura J.	Del Mar	NA	Pacific	America	USA	NA	claystone	FALSE	FALSE	FALSE	FALSE	30	15	NA	24.7	57	24.7	164	medium	0.12	NA	NA	NA	NA	0.12	1932-01-01	1994-01-01	NA	62.04	aerial photography	1.266	1.887	0.338	10.304	12.628	1.39	16.2045	2.75	12.989	1.212	200	4.2	17.3667	8.8
Coastal erosion hazards in Santa Cruz and San Diego Counties, California	1999-01-01	Journal of Coastal Research	NA	Moore	Laura J.	Del Mar	NA	Pacific	America	USA	NA	fluvial deposits	FALSE	FALSE	FALSE	FALSE	30	15	NA	24.7	57	24.7	164	weak	0.12	NA	NA	NA	NA	0.12	1932-01-01	1994-01-01	NA	62.04	aerial photography	1.266	1.887	0.338	10.304	12.628	1.39	16.2045	2.75	12.989	1.212	200	4.2	17.3667	8.8
Coastal erosion hazards in Santa Cruz and San Diego Counties, California	1999-01-01	Journal of Coastal Research	NA	Moore	Laura J.	Torrey Pines	NA	Pacific	America	USA	NA	sandstone	FALSE	FALSE	FALSE	FALSE	NA	NA	90	-999	-999	-999	164	strong	0.18	NA	NA	NA	NA	0.18	1932-01-01	1994-01-01	NA	62.04	aerial photography	1.266	1.887	0.338	10.304	12.628	1.39	16.2045	2.75	12.989	1.221	200	4.2	17.3667	8.8
Coastal erosion hazards in Santa Cruz and San Diego Counties, California	1999-01-01	Journal of Coastal Research	NA	Moore	Laura J.	Torrey Pines	NA	Pacific	America	USA	NA	sandstone, shale	FALSE	FALSE	FALSE	FALSE	NA	NA	90	-999	-999	-999	164	medium	0.18	NA	NA	NA	NA	0.18	1932-01-01	1994-01-01	NA	62.04	aerial photography	1.266	1.887	0.338	10.304	12.628	1.39	16.2045	2.75	12.989	1.221	200	4.2	17.3667	8.8
Coastal erosion hazards in Santa Cruz and San Diego Counties, California	1999-01-01	Journal of Coastal Research	NA	Moore	Laura J.	Torrey Pines	NA	Pacific	America	USA	NA	shale	FALSE	FALSE	FALSE	FALSE	NA	NA	90	-999	-999	-999	164	medium	0.18	NA	NA	NA	NA	0.18	1932-01-01	1994-01-01	NA	62.04	aerial photography	1.266	1.887	0.338	10.304	12.628	1.39	16.2045	2.75	12.989	1.221	200	4.2	17.3667	8.8
Coastal erosion hazards in Santa Cruz and San Diego Counties, California	1999-01-01	Journal of Coastal Research	NA	Moore	Laura J.	La Jolla	NA	Pacific	America	USA	NA	sandstone	FALSE	FALSE	FALSE	FALSE	20	5	NA	21.9	43	21.9	186	strong	0.08	NA	NA	NA	NA	0.08	1932-01-01	1994-01-01	NA	62.04	aerial photography	1.266	1.887	0.338	10.304	12.628	1.39	16.2045	2.75	12.989	1.221	200	4.2	17.3667	8.8
Coastal erosion hazards in Santa Cruz and San Diego Counties, California	1999-01-01	Journal of Coastal Research	NA	Moore	Laura J.	La Jolla	NA	Pacific	America	USA	NA	sandstone, shale	FALSE	FALSE	FALSE	FALSE	20	5	NA	21.9	43	21.9	186	medium	0.08	NA	NA	NA	NA	0.08	1932-01-01	1994-01-01	NA	62.04	aerial photography	1.266	1.887	0.338	10.304	12.628	1.39	16.2045	2.75	12.989	1.221	200	4.2	17.3667	8.8
Coastal erosion hazards in Santa Cruz and San Diego Counties, California	1999-01-01	Journal of Coastal Research	NA	Moore	Laura J.	La Jolla	NA	Pacific	America	USA	NA	shale	FALSE	FALSE	FALSE	FALSE	20	5	NA	21.9	43	21.9	186	medium	0.08	NA	NA	NA	NA	0.08	1932-01-01	1994-01-01	NA	62.04	aerial photography	1.266	1.887	0.338	10.304	12.628	1.39	16.2045	2.75	12.989	1.221	200	4.2	17.3667	8.8
Coastal erosion hazards in Santa Cruz and San Diego Counties, California	1999-01-01	Journal of Coastal Research	NA	Moore	Laura J.	La Jolla	NA	Pacific	America	USA	NA	fluvial deposits	FALSE	FALSE	FALSE	FALSE	20	5	NA	21.9	43	21.9	186	weak	0.08	NA	NA	NA	NA	0.08	1932-01-01	1994-01-01	NA	62.04	aerial photography	1.266	1.887	0.338	10.304	12.628	1.39	16.2045	2.75	12.989	1.221	200	4.2	17.3667	8.8
Coastal erosion hazards in Santa Cruz and San Diego Counties, California	1999-01-01	Journal of Coastal Research	NA	Moore	Laura J.	Pacific Beach	NA	Pacific	America	USA	NA	conglomerate	FALSE	FALSE	FALSE	FALSE	NA	NA	15	25	28	25	160	strong	0.1	NA	NA	NA	NA	0.1	1932-01-01	1994-01-01	NA	62.04	aerial photography	1.266	1.887	0.338	10.304	12.628	1.39	16.2045	2.75	12.989	1.238	200	4.2	17.3667	8.8
Coastal erosion hazards in Santa Cruz and San Diego Counties, California	1999-01-01	Journal of Coastal Research	NA	Moore	Laura J.	Pacific Beach	NA	Pacific	America	USA	NA	sandstone, conglomerates	FALSE	FALSE	FALSE	FALSE	NA	NA	15	25	28	25	160	strong	0.1	NA	NA	NA	NA	0.1	1932-01-01	1994-01-01	NA	62.04	aerial photography	1.266	1.887	0.338	10.304	12.628	1.39	16.2045	2.75	12.989	1.238	200	4.2	17.3667	8.8
Coastal erosion hazards in Santa Cruz and San Diego Counties, California	1999-01-01	Journal of Coastal Research	NA	Moore	Laura J.	Pacific Beach	NA	Pacific	America	USA	NA	sandstone	FALSE	FALSE	FALSE	FALSE	NA	NA	15	25	28	25	160	strong	0.1	NA	NA	NA	NA	0.1	1932-01-01	1994-01-01	NA	62.04	aerial photography	1.266	1.887	0.338	10.304	12.628	1.39	16.2045	2.75	12.989	1.238	200	4.2	17.3667	8.8
Coastal erosion hazards in Santa Cruz and San Diego Counties, California	1999-01-01	Journal of Coastal Research	NA	Moore	Laura J.	Pacific Beach	NA	Pacific	America	USA	NA	fluvial deposits	FALSE	FALSE	FALSE	FALSE	NA	NA	15	25	28	25	160	weak	0.1	NA	NA	NA	NA	0.1	1932-01-01	1994-01-01	NA	62.04	aerial photography	1.266	1.887	0.338	10.304	12.628	1.39	16.2045	2.75	12.989	1.238	200	4.2	17.3667	8.8
Coastal erosion hazards in Santa Cruz and San Diego Counties, California	1999-01-01	Journal of Coastal Research	NA	Moore	Laura J.	Point Loma	NA	Pacific	America	USA	NA	sandstone	FALSE	FALSE	FALSE	FALSE	NA	NA	NA	-999	-999	-999	167	strong	0.07	NA	NA	NA	NA	0.07	1932-01-01	1994-01-01	NA	62.04	aerial photography	1.266	1.887	0.338	10.304	12.628	1.39	16.2045	2.75	12.989	1.306	200	4.2	17.3667	8.8
Coastal erosion hazards in Santa Cruz and San Diego Counties, California	1999-01-01	Journal of Coastal Research	NA	Moore	Laura J.	Point Loma	NA	Pacific	America	USA	NA	sandstone, shale	FALSE	FALSE	FALSE	FALSE	NA	NA	NA	-999	-999	-999	167	medium	0.07	NA	NA	NA	NA	0.07	1932-01-01	1994-01-01	NA	62.04	aerial photography	1.266	1.887	0.338	10.304	12.628	1.39	16.2045	2.75	12.989	1.306	200	4.2	17.3667	8.8
Coastal erosion hazards in Santa Cruz and San Diego Counties, California	1999-01-01	Journal of Coastal Research	NA	Moore	Laura J.	Point Loma	NA	Pacific	America	USA	NA	shale	FALSE	FALSE	FALSE	FALSE	NA	NA	NA	-999	-999	-999	167	medium	0.07	NA	NA	NA	NA	0.07	1932-01-01	1994-01-01	NA	62.04	aerial photography	1.266	1.887	0.338	10.304	12.628	1.39	16.2045	2.75	12.989	1.306	200	4.2	17.3667	8.8
Coastal erosion hazards in Santa Cruz and San Diego Counties, California	1999-01-01	Journal of Coastal Research	NA	Moore	Laura J.	Point Loma	NA	Pacific	America	USA	NA	fluvial deposits	FALSE	FALSE	FALSE	FALSE	NA	NA	NA	-999	-999	-999	167	weak	0.07	NA	NA	NA	NA	0.07	1932-01-01	1994-01-01	NA	62.04	aerial photography	1.266	1.887	0.338	10.304	12.628	1.39	16.2045	2.75	12.989	1.306	200	4.2	17.3667	8.8
Coastal erosion hazards in Santa Cruz and San Diego Counties, California	1999-01-01	Journal of Coastal Research	NA	Moore	Laura J.	Solana	NA	Pacific	America	USA	NA	sandstone	FALSE	FALSE	FALSE	FALSE	NA	NA	20	1	1	1	165	strong	0.1	NA	NA	NA	NA	0.1	1932-01-01	1994-01-01	NA	62.04	aerial photography	1.266	1.887	0.338	10.304	12.628	1.39	16.2045	2.75	12.989	1.212	200	4.2	17.3667	8.8
Coastal erosion hazards in Santa Cruz and San Diego Counties, California	1999-01-01	Journal of Coastal Research	NA	Moore	Laura J.	Solana	NA	Pacific	America	USA	NA	fluvial deposits	FALSE	FALSE	FALSE	FALSE	NA	NA	20	1	1	1	165	weak	0.1	NA	NA	NA	NA	0.1	1932-01-01	1994-01-01	NA	62.04	aerial photography	1.266	1.887	0.338	10.304	12.628	1.39	16.2045	2.75	12.989	1.212	200	4.2	17.3667	8.8
Carry le Rouet	2015-01-01	NA	NA	Giuliano	Jeremy	Carry le Rouet - calcaires	Mediterranean	NA	Europe	France	4000	limestone, marl	FALSE	FALSE	TRUE	FALSE	NA	5	20	11.7	17	11.7	85	medium	0.006	NA	NA	NA	NA	0.006	2011-02-01	2012-06-01	NA	1.33	LiDAR	1.067	2.823	0.846	4.824	7.032	1.266	5.38888	2.25	19.35	0.172	601	19.7	13.8917	16.1
Processes and rate of retreat of the clay and sandstone sea cliffs of the northern Boulonnais (France)	2006-01-01	Geomorphology	10.1016/j.geomorph.2005.07.002	Pierre	Guillaume	Boulonnais	English channel	Atlantic	Europe	France	3000	mudstone, shale	TRUE	FALSE	FALSE	FALSE	40	10	NA	26.4	55	26.4	240	strong	0.08	5.7	NA	NA	NA	0.08	1939-01-01	2003-01-01	NA	64.04	aerial photography (orthorectified)	0.749	1.74	0.499	4.381	6.001	0.936	2.41156	2	21.114	5.705	579	43.5	9.94167	12.9
Processes and rate of retreat of the clay and sandstone sea cliffs of the northern Boulonnais (France)	2006-01-01	Geomorphology	10.1016/j.geomorph.2005.07.002	Pierre	Guillaume	Boulonnais	English channel	Atlantic	Europe	France	3000	marl	TRUE	FALSE	FALSE	FALSE	40	10	NA	26.4	55	26.4	240	medium	0.08	5.7	NA	NA	NA	0.08	1939-01-01	2003-01-01	NA	64.04	aerial photography (orthorectified)	0.749	1.74	0.499	4.381	6.001	0.936	2.41156	2	21.114	5.705	579	43.5	9.94167	12.9
Processes and rate of retreat of the clay and sandstone sea cliffs of the northern Boulonnais (France)	2006-01-01	Geomorphology	10.1016/j.geomorph.2005.07.002	Pierre	Guillaume	Boulonnais	English channel	Atlantic	Europe	France	3000	sandstone	TRUE	FALSE	FALSE	FALSE	40	10	NA	26.4	55	26.4	240	strong	0.08	5.7	NA	NA	NA	0.08	1939-01-01	2003-01-01	NA	64.04	aerial photography (orthorectified)	0.749	1.74	0.499	4.381	6.001	0.936	2.41156	2	21.114	5.705	579	43.5	9.94167	12.9
The role of groundwater in cliff instability: an example at Cape Blanc-Nez (Pas-de-Calais, France)	2006-01-01	Earth Surface Processes and Landforms	10.1002/esp.1229	Pierre	Guillaume	Saint Po - Ã«tit blanc nez	English channel	Atlantic	Europe	France	1000	clay	FALSE	FALSE	FALSE	FALSE	40	16	NA	31.9	77	31.9	225	weak	0.2	NA	NA	NA	NA	0.2	1939-01-01	2002-01-01	NA	63.04	aerial photography (orthorectified)	0.749	1.74	0.499	4.381	6.001	0.936	2.41156	2	21.114	5.101	579	43.5	9.94167	12.9
The role of groundwater in cliff instability: an example at Cape Blanc-Nez (Pas-de-Calais, France)	2006-01-01	Earth Surface Processes and Landforms	10.1002/esp.1229	Pierre	Guillaume	Petit_blanc Nez - Crupes	English channel	Atlantic	Europe	France	650	chalk	FALSE	FALSE	FALSE	FALSE	50	40	NA	47.7	77	47.7	237	weak	0.14	NA	NA	NA	NA	0.14	1939-01-01	2002-01-01	NA	63.04	aerial photography (orthorectified)	0.749	1.74	0.499	4.381	6.001	0.936	2.41156	2	21.114	5.101	579	43.5	9.94167	12.9
The role of groundwater in cliff instability: an example at Cape Blanc-Nez (Pas-de-Calais, France)	2006-01-01	Earth Surface Processes and Landforms	10.1002/esp.1229	Pierre	Guillaume	Les Crupes - Cran dEscalles	English channel	Atlantic	Europe	France	500	chalk	FALSE	FALSE	FALSE	FALSE	NA	NA	30	34.5	59	34.5	236	weak	0.21	NA	NA	NA	NA	0.21	1939-01-01	2002-01-01	NA	63.04	aerial photography (orthorectified)	0.749	1.74	0.499	4.381	6.001	0.936	2.41156	2	21.114	5.101	579	43.5	9.94167	12.9
The role of groundwater in cliff instability: an example at Cape Blanc-Nez (Pas-de-Calais, France)	2006-01-01	Earth Surface Processes and Landforms	10.1002/esp.1229	Pierre	Guillaume	Cran dEsqualles - Fond du Guet	English channel	Atlantic	Europe	France	2000	chalk	FALSE	FALSE	FALSE	FALSE	100	30	NA	56.8	116	56.8	237	weak	0.14	NA	NA	NA	NA	0.14	1944-01-01	2002-01-01	NA	58.04	aerial photography (orthorectified)	0.749	1.74	0.499	4.381	6.001	0.936	2.41156	2	21.114	5.101	579	43.5	9.94167	12.9
The role of groundwater in cliff instability: an example at Cape Blanc-Nez (Pas-de-Calais, France)	2006-01-01	Earth Surface Processes and Landforms	10.1002/esp.1229	Pierre	Guillaume	Fond du guet - stangatte	English channel	Atlantic	Europe	France	1500	silt	FALSE	FALSE	FALSE	FALSE	40	14	NA	33.3	72	33.3	247	weak	0.26	NA	NA	NA	NA	0.26	1944-01-01	2002-01-01	NA	58.04	aerial photography (orthorectified)	0.749	1.74	0.499	4.381	6.001	0.936	2.41156	2	21.114	5.101	579	43.5	9.94167	12.9
Compréhension des mouvements de terrain de la commune de Penestin, Morbihan : Retrait gonflement des argiles ou érosion littorale	2013-03-01	rapport public BRGM	BRGM/RP-62681-FR	Schroetter	Jean-Michel	Mine dOr Sud	NA	Atlantic	Europe	France	NA	clay	FALSE	FALSE	FALSE	FALSE	NA	NA	NA	14.4	18	14.4	148	weak	NA	20	NA	NA	NA	0.526039	1962-01-01	2000-01-01	NA	38.02	aerial photography	1.811	3.873	1.037	8.162	11.545	1.923	26.2661	4	9.969	3.734	643	16.9	11.9667	12.6
Compréhension des mouvements de terrain de la commune de Penestin, Morbihan : Retrait gonflement des argiles ou érosion littorale	2013-03-01	rapport public BRGM	BRGM/RP-62681-FR	Schroetter	Jean-Michel	Les demoiselles	NA	Atlantic	Europe	France	NA	clay	FALSE	FALSE	FALSE	FALSE	NA	NA	NA	12.5	16	12.5	160	weak	NA	30	NA	NA	NA	0.789058	1962-01-01	2000-01-01	NA	38.02	aerial photography	1.811	3.873	1.037	8.162	11.545	1.923	26.2661	4	9.969	3.734	643	16.9	11.9667	12.6
Prediction of soft-cliff retreat with accelerating sea-level rise	1997-01-01	Journal of Coastal Research	NA	Bray	Malcolm J.	Black Ven	English channel	Atlantic	Europe	UK	NA	clay, marl	FALSE	TRUE	FALSE	FALSE	NA	NA	160	68.3	137	68.3	93	weak	0.38	NA	NA	NA	NA	0.38	1901-01-01	1960-01-01	NA	59.04	historic maps	1.599	3.457	0.937	7.093	9.968	1.578	17.7946	3	13.604	2.638	655	49.5	9.96667	11.4
Prediction of soft-cliff retreat with accelerating sea-level rise	1997-01-01	Journal of Coastal Research	NA	Bray	Malcolm J.	Black Ven	English channel	Atlantic	Europe	UK	NA	clay, marl	FALSE	TRUE	FALSE	FALSE	NA	NA	160	68.3	137	68.3	93	weak	2.24	NA	NA	NA	NA	2.24	1958-01-01	1988-01-01	NA	30.02	aerial photography	1.599	3.457	0.937	7.093	9.968	1.578	17.7946	3	13.604	2.638	655	49.5	9.96667	11.4
Prediction of soft-cliff retreat with accelerating sea-level rise	1997-01-01	Journal of Coastal Research	NA	Bray	Malcolm J.	Stonebarrow	English channel	Atlantic	Europe	UK	NA	clay, marl	FALSE	TRUE	FALSE	FALSE	NA	NA	140	96	153	96	93	weak	0.4	NA	NA	NA	NA	0.4	01/01/1887	1987-01-01	NA	100.07	historic maps	1.599	3.457	0.937	7.093	9.968	1.578	17.7946	3	13.604	2.638	655	49.5	9.96667	11.4
Prediction of soft-cliff retreat with accelerating sea-level rise	1997-01-01	Journal of Coastal Research	NA	Bray	Malcolm J.	Seatown/Eype	English channel	Atlantic	Europe	UK	NA	sandstone	FALSE	TRUE	FALSE	FALSE	NA	NA	88	67.4	121	67.4	93	weak	0.3	NA	NA	NA	NA	0.3	1901-01-01	1987-01-01	NA	86.06	historic maps	1.599	3.457	0.937	7.093	9.968	1.578	17.7946	3	13.604	2.568	655	49.5	9.96667	11.4
Prediction of soft-cliff retreat with accelerating sea-level rise	1997-01-01	Journal of Coastal Research	NA	Bray	Malcolm J.	Hengistbury Head	English channel	Atlantic	Europe	UK	NA	sand, clay	FALSE	FALSE	FALSE	FALSE	NA	NA	30	5.4	11	5.4	81	weak	0.8	NA	NA	NA	NA	0.8	1987-01-01	1994-01-01	NA	7.01	aerial photography	1.391	3.094	0.852	6.483	9.187	1.468	12.3081	2.625	14.807	1.195	644	62	9.88333	11.7
Prediction of soft-cliff retreat with accelerating sea-level rise	1997-01-01	Journal of Coastal Research	NA	Bray	Malcolm J.	Becton	English channel	Atlantic	Europe	UK	NA	sand, clay	FALSE	FALSE	FALSE	FALSE	NA	NA	25	21	33	21	81	weak	0.85	NA	NA	NA	NA	0.85	01/01/1869	1958-01-01	NA	89.06	historic maps	1.391	3.094	0.852	6.483	9.187	1.468	12.3081	2.625	14.807	1.202	644	62	9.88333	11.7
Prediction of soft-cliff retreat with accelerating sea-level rise	1997-01-01	Journal of Coastal Research	NA	Bray	Malcolm J.	Becton	English channel	Atlantic	Europe	UK	NA	sand, clay	FALSE	FALSE	FALSE	FALSE	NA	NA	25	21	33	21	81	weak	2.14	NA	NA	NA	NA	2.14	1958-01-01	1993-01-01	NA	35.02	aerial photography	1.391	3.094	0.852	6.483	9.187	1.468	12.3081	2.625	14.807	1.202	644	62	9.88333	11.7
Long-term cliff retreat and erosion hotspots along the central shores of the Monterey Bay National Marine Sanctuary	2002-01-01	Marine Geology	NA	Moore	Laura J.	Opal cliff	NA	Pacific	America	USA	NA	sandstone	FALSE	FALSE	FALSE	FALSE	NA	NA	NA	13	13	13	52	strong	0.17	NA	NA	NA	NA	0.17	1953-01-01	1994-01-01	NA	41.03	Photogrammetry	1.931	3.191	0.654	10.126	12.909	1.576	37.048	3	11.493	1.323	314	17.5	13.85	9.1
Long-term cliff retreat and erosion hotspots along the central shores of the Monterey Bay National Marine Sanctuary	2002-01-01	Marine Geology	NA	Moore	Laura J.	Opal cliff	NA	Pacific	America	USA	NA	siltstone	FALSE	FALSE	FALSE	FALSE	NA	NA	NA	13	13	13	52	medium	0.17	NA	NA	NA	NA	0.17	1953-01-01	1994-01-01	NA	41.03	Photogrammetry	1.931	3.191	0.654	10.126	12.909	1.576	37.048	3	11.493	1.323	314	17.5	13.85	9.1
Long-term cliff retreat and erosion hotspots along the central shores of the Monterey Bay National Marine Sanctuary	2002-01-01	Marine Geology	NA	Moore	Laura J.	Depot Hill	NA	Pacific	America	USA	NA	sandstone	FALSE	FALSE	FALSE	FALSE	NA	NA	NA	24	24	24	57	strong	0.16	NA	NA	NA	NA	0.16	1953-01-01	1994-01-01	NA	41.03	Photogrammetry	1.931	3.191	0.654	10.126	12.909	1.576	37.048	3	11.493	1.323	314	17.5	13.85	9.1
Long-term cliff retreat and erosion hotspots along the central shores of the Monterey Bay National Marine Sanctuary	2002-01-01	Marine Geology	NA	Moore	Laura J.	Depot Hill	NA	Pacific	America	USA	NA	siltstone	FALSE	FALSE	FALSE	FALSE	NA	NA	NA	24	24	24	57	medium	0.16	NA	NA	NA	NA	0.16	1953-01-01	1994-01-01	NA	41.03	Photogrammetry	1.931	3.191	0.654	10.126	12.909	1.576	37.048	3	11.493	1.323	314	17.5	13.85	9.1
Long-term cliff retreat and erosion hotspots along the central shores of the Monterey Bay National Marine Sanctuary	2002-01-01	Marine Geology	NA	Moore	Laura J.	Manresa	NA	Pacific	America	USA	NA	dune deposits	FALSE	FALSE	FALSE	FALSE	NA	NA	NA	26	53	26	144	weak	0.32	NA	NA	NA	NA	0.32	1953-01-01	1994-01-01	NA	41.03	Photogrammetry	1.931	3.191	0.654	10.126	12.909	1.576	37.048	3	11.493	1.325	314	17.5	13.85	9.1
Coastal cliff recession risk: a simple judgement-based model	2005-01-01	Quarterly Journal of Engineering Geology and Hydrogeology	NA	Lee	E.M.	Benacre	North sea	Atlantic	Europe	UK	NA	sand , gravels	FALSE	TRUE	FALSE	FALSE	10	5	NA	5	10	5	11	weak	4.74	NA	NA	NA	NA	4.74	01/01/1884	1976-01-01	NA	92.06	historic maps	0.981	2.216	0.615	4.867	6.606	1.014	4.5958	2	21.168	1.518	595	50.7	9.73333	12.9
Coastal cliff recession risk: a simple judgement-based model	2005-01-01	Quarterly Journal of Engineering Geology and Hydrogeology	NA	Lee	E.M.	Benacre	North sea	Atlantic	Europe	UK	NA	sand , gravels	FALSE	TRUE	FALSE	FALSE	10	5	NA	5	10	5	11	weak	7.13	NA	NA	NA	NA	7.13	1991-01-01	1999-01-01	NA	8.01	Field transects averaged	0.981	2.216	0.615	4.867	6.606	1.014	4.5958	2	21.168	1.518	595	50.7	9.73333	12.9
Coastal cliff recession risk: a simple judgement-based model	2005-01-01	Quarterly Journal of Engineering Geology and Hydrogeology	NA	Lee	E.M.	Covehithe	North sea	Atlantic	Europe	UK	NA	sand , gravels	FALSE	TRUE	FALSE	FALSE	10	5	NA	7.6	11	7.6	11	weak	4.58	NA	NA	NA	NA	4.58	01/01/1884	1976-01-01	NA	92.06	historic maps	0.981	2.216	0.615	4.867	6.606	1.014	4.5958	2	21.168	1.518	595	50.7	9.73333	12.9
Coastal cliff recession risk: a simple judgement-based model	2005-01-01	Quarterly Journal of Engineering Geology and Hydrogeology	NA	Lee	E.M.	Covehithe	North sea	Atlantic	Europe	UK	NA	sand , gravels	FALSE	TRUE	FALSE	FALSE	10	5	NA	7.6	11	7.6	11	weak	8	NA	NA	NA	NA	8	1991-01-01	1999-01-01	NA	8.01	Field transects averaged	0.981	2.216	0.615	4.867	6.606	1.014	4.5958	2	21.168	1.518	595	50.7	9.73333	12.9
Coastal cliff recession risk: a simple judgement-based model	2005-01-01	Quarterly Journal of Engineering Geology and Hydrogeology	NA	Lee	E.M.	Easton woods	North sea	Atlantic	Europe	UK	NA	sand , gravels	FALSE	TRUE	FALSE	FALSE	10	5	NA	9.4	14	9.4	11	weak	4.24	NA	NA	NA	NA	4.24	01/01/1884	1976-01-01	NA	92.06	historic maps	0.981	2.216	0.615	4.867	6.606	1.014	4.5958	2	21.168	1.518	595	50.7	9.73333	12.9
Coastal cliff recession risk: a simple judgement-based model	2005-01-01	Quarterly Journal of Engineering Geology and Hydrogeology	NA	Lee	E.M.	Easton woods	North sea	Atlantic	Europe	UK	NA	sand , gravels	FALSE	TRUE	FALSE	FALSE	10	5	NA	9.4	14	9.4	11	weak	1.12	NA	NA	NA	NA	1.12	1991-01-01	1999-01-01	NA	8.01	Field transects averaged	0.981	2.216	0.615	4.867	6.606	1.014	4.5958	2	21.168	1.518	595	50.7	9.73333	12.9
Coastal cliff recession risk: a simple judgement-based model	2005-01-01	Quarterly Journal of Engineering Geology and Hydrogeology	NA	Lee	E.M.	Easton broad	North sea	Atlantic	Europe	UK	NA	sand , gravels	FALSE	TRUE	FALSE	FALSE	10	5	NA	3	3	3	11	weak	3.85	NA	NA	NA	NA	3.85	01/01/1884	1976-01-01	NA	92.06	historic maps	0.981	2.216	0.615	4.867	6.606	1.014	4.5958	2	21.168	1.518	595	50.7	9.73333	12.9
Coastal cliff recession risk: a simple judgement-based model	2005-01-01	Quarterly Journal of Engineering Geology and Hydrogeology	NA	Lee	E.M.	Easton broad	North sea	Atlantic	Europe	UK	NA	sand , gravels	FALSE	TRUE	FALSE	FALSE	10	5	NA	3	3	3	11	weak	7.25	NA	NA	NA	NA	7.25	1991-01-01	1999-01-01	NA	8.01	Field transects averaged	0.981	2.216	0.615	4.867	6.606	1.014	4.5958	2	21.168	1.518	595	50.7	9.73333	12.9
Coastal cliff recession risk: a simple judgement-based model	2005-01-01	Quarterly Journal of Engineering Geology and Hydrogeology	NA	Lee	E.M.	Easton Bavent	North sea	Atlantic	Europe	UK	NA	sand , gravels	FALSE	TRUE	FALSE	FALSE	10	5	NA	6	10	6	11	weak	3	NA	NA	NA	NA	3	01/01/1884	1976-01-01	NA	92.06	historic maps	0.981	2.216	0.615	4.867	6.606	1.014	4.5958	2	21.168	1.518	595	50.7	9.73333	12.9
Coastal cliff recession risk: a simple judgement-based model	2005-01-01	Quarterly Journal of Engineering Geology and Hydrogeology	NA	Lee	E.M.	Easton Bavent	North sea	Atlantic	Europe	UK	NA	sand , gravels	FALSE	TRUE	FALSE	FALSE	10	5	NA	6	10	6	11	weak	1.12	NA	NA	NA	NA	1.12	1991-01-01	1999-01-01	NA	8.01	Field transects averaged	0.981	2.216	0.615	4.867	6.606	1.014	4.5958	2	21.168	1.518	595	50.7	9.73333	12.9
Influence of Wave Action and Lithology on Sea Cliff Mass Movements in Central Algarve Coast, Portugal	2011-11-01	Journal of Coastal Research	10.2112/JCOASTRES-D-11-00004.1	Bezerra	Maria M.	Algarve Sector I	NA	Atlantic	Europe	Portugal	2512	limestone	FALSE	FALSE	FALSE	FALSE	8	NA	NA	19.5	40	19.5	112	strong	NA	NA	1217	NA	NA	NA	1947-01-01	1992-01-01	NA	45.03	survey	1.463	2.768	0.68	8.37	12.172	2.08	17.5783	3.75	10.049	2.085	436	5.3	16.0333	12.2
Influence of Wave Action and Lithology on Sea Cliff Mass Movements in Central Algarve Coast, Portugal	2011-11-01	Journal of Coastal Research	10.2112/JCOASTRES-D-11-00004.1	Bezerra	Maria M.	Algarve Sector I	NA	Atlantic	Europe	Portugal	2512	limestone	FALSE	FALSE	FALSE	FALSE	8	NA	NA	19.5	40	19.5	112	strong	NA	NA	1217	NA	NA	NA	1947-01-01	1992-01-01	NA	45.03	survey	1.463	2.768	0.68	8.37	12.172	2.08	17.5783	3.75	10.049	2.085	436	5.3	16.0333	12.2
Influence of Wave Action and Lithology on Sea Cliff Mass Movements in Central Algarve Coast, Portugal	2011-11-01	Journal of Coastal Research	10.2112/JCOASTRES-D-11-00004.1	Bezerra	Maria M.	Algarve Sector I	NA	Atlantic	Europe	Portugal	2512	siltstone	FALSE	FALSE	FALSE	FALSE	8	NA	NA	19.5	40	19.5	112	strong	NA	NA	1217	NA	NA	NA	1947-01-01	1992-01-01	NA	45.03	survey	1.463	2.768	0.68	8.37	12.172	2.08	17.5783	3.75	10.049	2.085	436	5.3	16.0333	12.2
Influence of Wave Action and Lithology on Sea Cliff Mass Movements in Central Algarve Coast, Portugal	2011-11-01	Journal of Coastal Research	10.2112/JCOASTRES-D-11-00004.1	Bezerra	Maria M.	Algarve sector II	NA	Atlantic	Europe	Portugal	3066	limestone	FALSE	FALSE	FALSE	FALSE	25	NA	NA	19.7	40	19.7	86	strong	NA	NA	3066	NA	NA	NA	1947-01-01	1992-01-01	NA	45.03	survey	1.463	2.768	0.68	8.37	12.172	2.08	17.5783	3.75	10.049	2.085	436	5.3	16.0333	12.2
Influence of Wave Action and Lithology on Sea Cliff Mass Movements in Central Algarve Coast, Portugal	2011-11-01	Journal of Coastal Research	10.2112/JCOASTRES-D-11-00004.1	Bezerra	Maria M.	Algarve sector II	NA	Atlantic	Europe	Portugal	3066	limestone	FALSE	FALSE	FALSE	FALSE	25	NA	NA	19.7	40	19.7	86	strong	NA	NA	3066	NA	NA	NA	1947-01-01	1992-01-01	NA	45.03	survey	1.463	2.768	0.68	8.37	12.172	2.08	17.5783	3.75	10.049	2.085	436	5.3	16.0333	12.2
Influence of Wave Action and Lithology on Sea Cliff Mass Movements in Central Algarve Coast, Portugal	2011-11-01	Journal of Coastal Research	10.2112/JCOASTRES-D-11-00004.1	Bezerra	Maria M.	Algarve sector II	NA	Atlantic	Europe	Portugal	3066	siltstone	FALSE	FALSE	FALSE	FALSE	25	NA	NA	19.7	40	19.7	86	strong	NA	NA	3066	NA	NA	NA	1947-01-01	1992-01-01	NA	45.03	survey	1.463	2.768	0.68	8.37	12.172	2.08	17.5783	3.75	10.049	2.085	436	5.3	16.0333	12.2
Influence of Wave Action and Lithology on Sea Cliff Mass Movements in Central Algarve Coast, Portugal	2011-11-01	Journal of Coastal Research	10.2112/JCOASTRES-D-11-00004.1	Bezerra	Maria M.	Algarve sector III	NA	Atlantic	Europe	Portugal	2849	claystone	FALSE	FALSE	FALSE	FALSE	40	NA	NA	20.3	47	20.3	74	medium	NA	NA	2849	NA	NA	NA	1947-01-01	1992-01-01	NA	45.03	survey	1.463	2.768	0.68	8.37	12.172	2.08	17.5783	3.75	10.049	2.085	436	5.3	16.0333	12.2
Influence of Wave Action and Lithology on Sea Cliff Mass Movements in Central Algarve Coast, Portugal	2011-11-01	Journal of Coastal Research	10.2112/JCOASTRES-D-11-00004.1	Bezerra	Maria M.	Algarve sector IV	NA	Atlantic	Europe	Portugal	1659	limestone	FALSE	FALSE	FALSE	FALSE	30	NA	NA	21.2	40	21.2	102	strong	NA	NA	1659	NA	NA	NA	1947-01-01	1992-01-01	NA	45.03	survey	1.463	2.768	0.68	8.37	12.172	2.08	17.5783	3.75	10.049	2.085	436	5.3	16.0333	12.2
Influence of Wave Action and Lithology on Sea Cliff Mass Movements in Central Algarve Coast, Portugal	2011-11-01	Journal of Coastal Research	10.2112/JCOASTRES-D-11-00004.1	Bezerra	Maria M.	Algarve sector IV	NA	Atlantic	Europe	Portugal	1659	limestone	FALSE	FALSE	FALSE	FALSE	30	NA	NA	21.2	40	21.2	102	strong	NA	NA	1659	NA	NA	NA	1947-01-01	1992-01-01	NA	45.03	survey	1.463	2.768	0.68	8.37	12.172	2.08	17.5783	3.75	10.049	2.085	436	5.3	16.0333	12.2
Influence of Wave Action and Lithology on Sea Cliff Mass Movements in Central Algarve Coast, Portugal	2011-11-01	Journal of Coastal Research	10.2112/JCOASTRES-D-11-00004.1	Bezerra	Maria M.	Algarve sector V	NA	Atlantic	Europe	Portugal	4970	limestone	FALSE	FALSE	FALSE	FALSE	40	NA	NA	20.4	41	20.4	80	strong	NA	NA	4970	NA	NA	NA	1947-01-01	1992-01-01	NA	45.03	survey	1.463	2.768	0.68	8.37	12.172	2.08	17.5783	3.75	10.049	2.085	436	5.3	16.0333	12.2
Evaluation of Cliff Retreat and Beach Nourishment in Southern Portugal Using Photogrammetric Techniques	2008-07-01	Journal of Coastal Research	10.2112/06-0781.1	Cruz de Oliveira	S.	Forte Novo	NA	Atlantic	Europe	Portugal	367	sand	FALSE	FALSE	FALSE	FALSE	NA	NA	9	6.2	12	6.2	118	weak	2.9	NA	NA	NA	NA	2.9	1976-01-01	2001-01-01	NA	25.02	aerial photogrammetry	1.463	2.768	0.68	8.37	12.172	2.08	17.5783	3.75	10.049	2.085	436	5.3	16.0333	12.2
Evaluation of Cliff Retreat and Beach Nourishment in Southern Portugal Using Photogrammetric Techniques	2008-07-01	Journal of Coastal Research	10.2112/06-0781.1	Cruz de Oliveira	S.	Trafal	NA	Atlantic	Europe	Portugal	387	sand	FALSE	FALSE	FALSE	FALSE	NA	NA	6	6.2	11	6.2	119	weak	1.8	NA	NA	NA	NA	1.8	1976-01-01	2001-01-01	NA	25.02	aerial photogrammetry	1.463	2.768	0.68	8.37	12.172	2.08	17.5783	3.75	10.049	2.085	436	5.3	16.0333	12.2
Evaluation of Cliff Retreat and Beach Nourishment in Southern Portugal Using Photogrammetric Techniques	2008-07-01	Journal of Coastal Research	10.2112/06-0781.1	Cruz de Oliveira	S.	Vale de Lobo East	NA	Atlantic	Europe	Portugal	185	sand	FALSE	FALSE	FALSE	FALSE	NA	NA	19	20.3	40	20.3	125	weak	1	NA	NA	NA	NA	1	1976-01-01	2001-01-01	NA	25.02	aerial photogrammetry	1.463	2.768	0.68	8.37	12.172	2.08	17.5783	3.75	10.049	2.085	436	5.3	16.0333	12.2
Evaluation of Cliff Retreat and Beach Nourishment in Southern Portugal Using Photogrammetric Techniques	2008-07-01	Journal of Coastal Research	10.2112/06-0781.1	Cruz de Oliveira	S.	Vale de Lobo Central	NA	Atlantic	Europe	Portugal	431	sand	FALSE	FALSE	FALSE	FALSE	NA	NA	16	24	29	24	119	weak	0.9	NA	NA	NA	NA	0.9	1976-01-01	2001-01-01	NA	25.02	aerial photogrammetry	1.463	2.768	0.68	8.37	12.172	2.08	17.5783	3.75	10.049	2.085	436	5.3	16.0333	12.2
Evaluation of Cliff Retreat and Beach Nourishment in Southern Portugal Using Photogrammetric Techniques	2008-07-01	Journal of Coastal Research	10.2112/06-0781.1	Cruz de Oliveira	S.	Vale de Lobo West	NA	Atlantic	Europe	Portugal	321	sand	FALSE	FALSE	FALSE	FALSE	NA	NA	15	21.7	26	21.7	120	weak	0.5	NA	NA	NA	NA	0.5	1976-01-01	2001-01-01	NA	25.02	aerial photogrammetry	1.463	2.768	0.68	8.37	12.172	2.08	17.5783	3.75	10.049	2.085	436	5.3	16.0333	12.2
Retreat rates, modalities and agents responsible for erosion along the coastal chalk cliffs of Upper Normandy: The contribution of terrestrial laser scanning	2015-09-01	Geomorphology	10.1016/j.geomorph.2015.05.007	Letortu	Pauline	Petit Ailli	English channel	Atlantic	Europe	France	250	chalk	FALSE	FALSE	FALSE	FALSE	40	NA	NA	50.1	77	50.1	280	weak	0.09	NA	NA	NA	NA	0.09	2011-02-24	2011-09-27	NA	0.59	Terrestrial laser scanning	1.264	2.952	0.835	6.101	8.658	1.397	9.56439	2.5	15.181	6.286	602	33.1	10.3167	13.2
Retreat rates, modalities and agents responsible for erosion along the coastal chalk cliffs of Upper Normandy: The contribution of terrestrial laser scanning	2015-09-01	Geomorphology	10.1016/j.geomorph.2015.05.007	Letortu	Pauline	Petit Ailli	English channel	Atlantic	Europe	France	250	chalk	FALSE	FALSE	FALSE	FALSE	40	NA	NA	50.1	77	50.1	280	weak	0.17	NA	NA	NA	NA	0.17	2011-12-18	2012-03-21	NA	0.26	Terrestrial laser scanning	1.264	2.952	0.835	6.101	8.658	1.397	9.56439	2.5	15.181	6.286	602	33.1	10.3167	13.2
Retreat rates, modalities and agents responsible for erosion along the coastal chalk cliffs of Upper Normandy: The contribution of terrestrial laser scanning	2015-09-01	Geomorphology	10.1016/j.geomorph.2015.05.007	Letortu	Pauline	Petit Ailli	English channel	Atlantic	Europe	France	250	chalk	FALSE	FALSE	FALSE	FALSE	40	NA	NA	50.1	77	50.1	280	weak	0.06	NA	NA	NA	NA	0.06	2012-03-21	2012-09-18	NA	0.5	Terrestrial laser scanning	1.264	2.952	0.835	6.101	8.658	1.397	9.56439	2.5	15.181	6.286	602	33.1	10.3167	13.2
Retreat rates, modalities and agents responsible for erosion along the coastal chalk cliffs of Upper Normandy: The contribution of terrestrial laser scanning	2015-09-01	Geomorphology	10.1016/j.geomorph.2015.05.007	Letortu	Pauline	Petit Ailli	English channel	Atlantic	Europe	France	250	chalk	FALSE	FALSE	FALSE	FALSE	40	NA	NA	50.1	77	50.1	280	weak	1.16	NA	NA	NA	NA	1.16	2012-09-18	2013-02-11	NA	0.4	Terrestrial laser scanning	1.264	2.952	0.835	6.101	8.658	1.397	9.56439	2.5	15.181	6.286	602	33.1	10.3167	13.2
Retreat rates, modalities and agents responsible for erosion along the coastal chalk cliffs of Upper Normandy: The contribution of terrestrial laser scanning	2015-09-01	Geomorphology	10.1016/j.geomorph.2015.05.007	Letortu	Pauline	Petit Ailli	English channel	Atlantic	Europe	France	250	chalk	FALSE	FALSE	FALSE	FALSE	40	NA	NA	50.1	77	50.1	280	weak	0.001	NA	NA	NA	NA	0.001	2010-10-08	2011-02-24	NA	0.38	Terrestrial laser scanning	1.264	2.952	0.835	6.101	8.658	1.397	9.56439	2.5	15.181	6.286	602	33.1	10.3167	13.2
Retreat rates, modalities and agents responsible for erosion along the coastal chalk cliffs of Upper Normandy: The contribution of terrestrial laser scanning	2015-09-01	Geomorphology	10.1016/j.geomorph.2015.05.007	Letortu	Pauline	Petit Ailli	English channel	Atlantic	Europe	France	250	chalk	FALSE	FALSE	FALSE	FALSE	40	NA	NA	50.1	77	50.1	280	weak	0.001	NA	NA	NA	NA	0.001	2011-09-27	2012-12-18	NA	1.23	Terrestrial laser scanning	1.264	2.952	0.835	6.101	8.658	1.397	9.56439	2.5	15.181	6.286	602	33.1	10.3167	13.2
Dynamic conditions for shore platform initiation	1996-01-01	NA	NA	Tsujimoto	Hidekazu	Notsuka	NA	Pacific	Asia	japan	NA	fluvial deposits	FALSE	FALSE	FALSE	FALSE	20	10	NA	20.2	40	20.2	30	weak	NA	25	NA	NA	NA	2.4975	1964-01-01	1974-01-01	NA	10.01	survey	1.435	2.729	0.648	7.446	9.981	1.408	15.0449	2.5	17.56	0.707	1258	116.3	5.28333	25
Dynamic conditions for shore platform initiation	1996-01-01	NA	NA	Tsujimoto	Hidekazu	Notsuka	NA	Pacific	Asia	japan	NA	fluvial deposits	FALSE	FALSE	FALSE	FALSE	20	10	NA	20.2	40	20.2	30	weak	1.3	NA	NA	NA	NA	1.3	1920-01-01	1975-01-01	NA	55.04	historic maps	1.435	2.729	0.648	7.446	9.981	1.408	15.0449	2.5	17.56	0.707	1258	116.3	5.28333	25
Shoreline change mapping along the coast of Galicia, Spain	2013-09-01	Proceedings of the ICE - Maritime Engineering	10.1680/maen.2012.23	Pérez-Alberti	augusto	Sector 1	NA	Atlantic	Europe	Spain	NA	granite	FALSE	FALSE	FALSE	FALSE	NA	NA	NA	89.3	206	89.3	144	strong	1.18	NA	NA	NA	NA	1.18	2003-01-01	2008-01-01	NA	5	aerial photography (orthorectified)	2.461	4.782	1.167	9.093	12.614	1.994	54.0372	4	9.461	2.334	1233	14.6	14.125	9.7
Shoreline change mapping along the coast of Galicia, Spain	2013-09-01	Proceedings of the ICE - Maritime Engineering	10.1680/maen.2012.23	Pérez-Alberti	augusto	Sector 2	NA	Atlantic	Europe	Spain	NA	granite	FALSE	FALSE	FALSE	FALSE	NA	NA	NA	73.5	217	73.5	115	strong	0.38	NA	NA	NA	NA	0.38	2003-01-01	2008-01-01	NA	5	aerial photography (orthorectified)	2.461	4.782	1.167	9.093	12.614	1.994	54.0372	4	9.461	2.334	1233	14.6	14.125	9.7
Shoreline change mapping along the coast of Galicia, Spain	2013-09-01	Proceedings of the ICE - Maritime Engineering	10.1680/maen.2012.23	Pérez-Alberti	augusto	Sector 3	NA	Atlantic	Europe	Spain	NA	granite	FALSE	FALSE	FALSE	FALSE	NA	NA	NA	20.4	81	20.4	19	strong	0.21	NA	NA	NA	NA	0.21	2003-01-01	2008-01-01	NA	5	aerial photography (orthorectified)	2.461	4.782	1.167	9.093	12.614	1.994	54.0372	4	9.461	2.334	1233	14.6	14.125	9.7
Shoreline change mapping along the coast of Galicia, Spain	2013-09-01	Proceedings of the ICE - Maritime Engineering	10.1680/maen.2012.23	Pérez-Alberti	augusto	Sector 4	NA	Atlantic	Europe	Spain	NA	granite	FALSE	FALSE	FALSE	FALSE	NA	NA	NA	31	44	31	326	strong	0.38	NA	NA	NA	NA	0.38	2003-01-01	2008-01-01	NA	5	aerial photography (orthorectified)	2.461	4.782	1.167	9.093	12.614	1.994	54.0372	4	9.461	2.334	1233	14.6	14.125	9.7
Shoreline change mapping along the coast of Galicia, Spain	2013-09-01	Proceedings of the ICE - Maritime Engineering	10.1680/maen.2012.23	Pérez-Alberti	augusto	Sector 5	NA	Atlantic	Europe	Spain	NA	granite	FALSE	FALSE	FALSE	FALSE	NA	NA	NA	31	37	31	327	strong	0.09	NA	NA	NA	NA	0.09	2003-01-01	2008-01-01	NA	5	aerial photography (orthorectified)	2.461	4.782	1.167	9.093	12.614	1.994	54.0372	4	9.461	2.334	1233	14.6	14.125	9.7
Shoreline change mapping along the coast of Galicia, Spain	2013-09-01	Proceedings of the ICE - Maritime Engineering	10.1680/maen.2012.23	Pérez-Alberti	augusto	Sector 6	NA	Atlantic	Europe	Spain	NA	granite	FALSE	FALSE	FALSE	FALSE	NA	NA	NA	37.2	97	37.2	76	strong	0.36	NA	NA	NA	NA	0.36	2003-01-01	2008-01-01	NA	5	aerial photography (orthorectified)	2.461	4.782	1.167	9.093	12.614	1.994	54.0372	4	9.461	2.334	1233	14.6	14.125	9.7
Mass movements and cliff retreat along the SW Spanish coast	2009-01-01	Journal of Coastal Research	NA	Del Rio	L.	Grajuela	NA	Atlantic	Europe	Spain	NA	sand , gravels	FALSE	FALSE	FALSE	FALSE	10	NA	NA	17.4	27	17.4	235	weak	1.2	NA	NA	NA	NA	1.2	2003-01-01	2008-01-01	50	50	aerial photography (orthorectified)	1.144	2.207	0.558	8.249	12.173	2.182	10.5929	3.75	9.488	2.17	388	5.8	18	13.6
Mass movements and cliff retreat along the SW Spanish coast	2009-01-01	Journal of Coastal Research	NA	Del Rio	L.	La Ballena - aguadulce	NA	Atlantic	Europe	Spain	NA	sand , gravels	FALSE	FALSE	FALSE	FALSE	10	NA	NA	6.2	10	6.2	120	weak	0.85	NA	NA	NA	NA	0.85	2003-01-01	2008-01-01	50	50	aerial photography (orthorectified)	1.144	2.207	0.558	8.249	12.173	2.182	10.5929	3.75	9.488	2.174	388	5.8	18	13.6
Mass movements and cliff retreat along the SW Spanish coast	2009-01-01	Journal of Coastal Research	NA	Del Rio	L.	Rota	NA	Atlantic	Europe	Spain	NA	marl, sand	FALSE	FALSE	FALSE	FALSE	NA	NA	NA	14.9	30	14.9	90	weak	0.8	NA	NA	NA	NA	0.8	2003-01-01	2008-01-01	50	50	aerial photography (orthorectified)	1.144	2.207	0.558	8.249	12.173	2.182	10.5929	3.75	9.488	2.174	388	5.8	18	13.6
Mass movements and cliff retreat along the SW Spanish coast	2009-01-01	Journal of Coastal Research	NA	Del Rio	L.	La Barrosa	NA	Atlantic	Europe	Spain	NA	conglomerate	FALSE	FALSE	FALSE	FALSE	NA	NA	NA	11.9	17	11.9	113	strong	0.2	NA	NA	NA	NA	0.2	2003-01-01	2008-01-01	50	50	aerial photography (orthorectified)	1.144	2.207	0.558	8.249	12.173	2.182	10.5929	3.75	9.488	2.071	379	3.6	17.8667	13.9
Mass movements and cliff retreat along the SW Spanish coast	2009-01-01	Journal of Coastal Research	NA	Del Rio	L.	La Barrosa	NA	Atlantic	Europe	Spain	NA	sand, clay	FALSE	FALSE	FALSE	FALSE	NA	NA	NA	11.9	17	11.9	113	weak	0.2	NA	NA	NA	NA	0.2	2003-01-01	2008-01-01	50	50	aerial photography (orthorectified)	1.144	2.207	0.558	8.249	12.173	2.182	10.5929	3.75	9.488	2.071	379	3.6	17.8667	13.9
Mass movements and cliff retreat along the SW Spanish coast	2009-01-01	Journal of Coastal Research	NA	Del Rio	L.	Calas de concil	NA	Atlantic	Europe	Spain	NA	clay, marl	FALSE	FALSE	FALSE	FALSE	NA	NA	NA	24.3	44	24.3	131	weak	0.2	NA	NA	NA	NA	0.2	2003-01-01	2008-01-01	50	50	aerial photography (orthorectified)	1.144	2.207	0.558	8.249	12.173	2.182	10.5929	3.75	9.488	1.912	379	3.6	17.8667	13.9
Mass movements and cliff retreat along the SW Spanish coast	2009-01-01	Journal of Coastal Research	NA	Del Rio	L.	Calas de concil	NA	Atlantic	Europe	Spain	NA	sandstone	FALSE	FALSE	FALSE	FALSE	NA	NA	NA	24.3	44	24.3	131	strong	0.2	NA	NA	NA	NA	0.2	2003-01-01	2008-01-01	50	50	aerial photography (orthorectified)	1.144	2.207	0.558	8.249	12.173	2.182	10.5929	3.75	9.488	1.912	379	3.6	17.8667	13.9
Rates, patterns, timing and magnitude-frequency of cliff retreat phenomena; a case study on the west coast of Portugal	2006-01-01	Zeitschrift fuer Geomorphologie. Supplementband	NA	Marques	Fernando	Monte Clerigo - tot	NA	Atlantic	Europe	Portugal	1300	sandstone	TRUE	FALSE	FALSE	FALSE	40	NA	NA	35.5	72	35.5	218	weak	0.008	NA	NA	NA	NA	0.008	1947-01-01	2000-01-01	NA	53.04	aerial photogrammetry	1.643	3.117	0.758	8.877	12.589	2.101	23.5127	3.75	9.408	2.082	447	2.1	16.3667	11.3
Rates, patterns, timing and magnitude-frequency of cliff retreat phenomena; a case study on the west coast of Portugal	2006-01-01	Zeitschrift fuer Geomorphologie. Supplementband	NA	Marques	Fernando	Monte Clerigo - tot	NA	Atlantic	Europe	Portugal	1300	shale , greywacke	TRUE	FALSE	FALSE	FALSE	40	NA	NA	35.5	72	35.5	218	strong	0.008	NA	NA	NA	NA	0.008	1947-01-01	2000-01-01	NA	53.04	aerial photogrammetry	1.643	3.117	0.758	8.877	12.589	2.101	23.5127	3.75	9.408	2.082	447	2.1	16.3667	11.3
Rates, patterns, timing and magnitude-frequency of cliff retreat phenomena; a case study on the west coast of Portugal	2006-01-01	Zeitschrift fuer Geomorphologie. Supplementband	NA	Marques	Fernando	Monte clerigo - sandstones	NA	Atlantic	Europe	Portugal	220	sandstone	FALSE	FALSE	FALSE	FALSE	NA	NA	40	37.3	72	37.3	215	weak	0.015	NA	NA	NA	NA	0.015	1947-01-01	2000-01-01	NA	53.04	aerial photogrammetry	1.643	3.117	0.758	8.877	12.589	2.101	23.5127	3.75	9.408	2.082	447	2.1	16.3667	11.3
Rates, patterns, timing and magnitude-frequency of cliff retreat phenomena; a case study on the west coast of Portugal	2006-01-01	Zeitschrift fuer Geomorphologie. Supplementband	NA	Marques	Fernando	Monte Clerigo - Shales & Greywackes	NA	Atlantic	Europe	Portugal	1080	shale , greywacke	FALSE	FALSE	FALSE	FALSE	NA	NA	40	34.3	68	34.3	220	strong	0.006	NA	NA	NA	NA	0.006	1947-01-01	2000-01-01	NA	53.04	aerial photogrammetry	1.643	3.117	0.758	8.877	12.589	2.101	23.5127	3.75	9.408	2.082	447	2.1	16.3667	11.3
Rates, patterns, timing and magnitude-frequency of cliff retreat phenomena; a case study on the west coast of Portugal	2006-01-01	Zeitschrift fuer Geomorphologie. Supplementband	NA	Marques	Fernando	Monte Clerigo - ESPED site zone	NA	Atlantic	Europe	Portugal	220	shale , greywacke	FALSE	FALSE	FALSE	FALSE	NA	NA	40	23	36	23	203	strong	0.004	NA	NA	NA	NA	0.004	1947-01-01	2000-01-01	3.77	3.77	Field photography - stereoplotter	1.643	3.117	0.758	8.877	12.589	2.101	23.5127	3.75	9.408	2.082	447	2.1	16.3667	11.3
Rates, patterns, timing and magnitude-frequency of cliff retreat phenomena; a case study on the west coast of Portugal	2006-01-01	Zeitschrift fuer Geomorphologie. Supplementband	NA	Marques	Fernando	Avencas-Parede - tot	NA	Atlantic	Europe	Portugal	2600	limestone	FALSE	FALSE	FALSE	FALSE	15	4	NA	17.4	35	17.4	160	strong	0.001	NA	NA	NA	NA	0.001	1947-01-01	2000-01-01	NA	53.04	aerial photogrammetry	2.274	4.214	1.005	9.161	12.808	2.033	46.4821	3.5	10.717	2.067	577	0.6	16.7	11.2
Rates, patterns, timing and magnitude-frequency of cliff retreat phenomena; a case study on the west coast of Portugal	2006-01-01	Zeitschrift fuer Geomorphologie. Supplementband	NA	Marques	Fernando	Avencas-Parede - tot	NA	Atlantic	Europe	Portugal	2600	marl	FALSE	FALSE	FALSE	FALSE	15	4	NA	17.4	35	17.4	160	medium	0.001	NA	NA	NA	NA	0.001	1947-01-01	2000-01-01	NA	53.04	aerial photogrammetry	2.274	4.214	1.005	9.161	12.808	2.033	46.4821	3.5	10.717	2.067	577	0.6	16.7	11.2
Rates, patterns, timing and magnitude-frequency of cliff retreat phenomena; a case study on the west coast of Portugal	2006-01-01	Zeitschrift fuer Geomorphologie. Supplementband	NA	Marques	Fernando	Avencas-Parede - tot	NA	Atlantic	Europe	Portugal	2600	sandstone	FALSE	FALSE	FALSE	FALSE	15	4	NA	17.4	35	17.4	160	strong	0.001	NA	NA	NA	NA	0.001	1947-01-01	2000-01-01	NA	53.04	aerial photogrammetry	2.274	4.214	1.005	9.161	12.808	2.033	46.4821	3.5	10.717	2.067	577	0.6	16.7	11.2
Rates, patterns, timing and magnitude-frequency of cliff retreat phenomena; a case study on the west coast of Portugal	2006-01-01	Zeitschrift fuer Geomorphologie. Supplementband	NA	Marques	Fernando	Ribeira de Ilhas - tot	NA	Atlantic	Europe	Portugal	4725	limestone	TRUE	FALSE	FALSE	FALSE	35	25	NA	31	77	31	180	strong	0.003	NA	NA	NA	NA	0.003	1947-01-01	2000-01-01	NA	53.04	aerial photogrammetry	2.274	4.214	1.005	9.161	12.808	2.033	46.4821	3.5	10.717	2.177	577	0.6	16.7	11.2
Rates, patterns, timing and magnitude-frequency of cliff retreat phenomena; a case study on the west coast of Portugal	2006-01-01	Zeitschrift fuer Geomorphologie. Supplementband	NA	Marques	Fernando	Ribeira de Ilhas - tot	NA	Atlantic	Europe	Portugal	4725	marl	TRUE	FALSE	FALSE	FALSE	35	25	NA	31	77	31	180	medium	0.003	NA	NA	NA	NA	0.003	1947-01-01	2000-01-01	NA	53.04	aerial photogrammetry	2.274	4.214	1.005	9.161	12.808	2.033	46.4821	3.5	10.717	2.177	577	0.6	16.7	11.2
Rates, patterns, timing and magnitude-frequency of cliff retreat phenomena; a case study on the west coast of Portugal	2006-01-01	Zeitschrift fuer Geomorphologie. Supplementband	NA	Marques	Fernando	Ribeira de Ilhas - tot	NA	Atlantic	Europe	Portugal	4725	marly lilmestone	TRUE	FALSE	FALSE	FALSE	35	25	NA	31	77	31	180	strong	0.003	NA	NA	NA	NA	0.003	1947-01-01	2000-01-01	NA	53.04	aerial photogrammetry	2.274	4.214	1.005	9.161	12.808	2.033	46.4821	3.5	10.717	2.177	577	0.6	16.7	11.2
Rates, patterns, timing and magnitude-frequency of cliff retreat phenomena; a case study on the west coast of Portugal	2006-01-01	Zeitschrift fuer Geomorphologie. Supplementband	NA	Marques	Fernando	Ribeira de Ilhas - tot	NA	Atlantic	Europe	Portugal	4725	sandstone	TRUE	FALSE	FALSE	FALSE	35	25	NA	31	77	31	180	strong	0.003	NA	NA	NA	NA	0.003	1947-01-01	2000-01-01	NA	53.04	aerial photogrammetry	2.274	4.214	1.005	9.161	12.808	2.033	46.4821	3.5	10.717	2.177	577	0.6	16.7	11.2
Beach and cliff retreat induced by storm groups at Forte Novo, Algarve (Portugal)	2011-01-01	Journal of Coastal Research	NA	Nunes	Mara	Forte Novo	NA	Atlantic	Europe	Portugal	400	sand, sandstone	TRUE	FALSE	FALSE	FALSE	NA	NA	10	5	12	5	180	weak	NA	0.33	NA	NA	NA	1.32	2009-11-06	2010-02-05	NA	0.25	LiDAR	1.463	2.768	0.68	8.37	12.172	2.08	17.5783	3.75	10.049	2.085	436	5.3	16.0333	12.2
Beach and cliff retreat induced by storm groups at Forte Novo, Algarve (Portugal)	2011-01-01	Journal of Coastal Research	NA	Nunes	Mara	Forte Novo	NA	Atlantic	Europe	Portugal	400	sand, sandstone	TRUE	FALSE	FALSE	FALSE	NA	NA	10	5	12	5	180	weak	NA	0.37	NA	NA	NA	9.25	2010-02-05	2010-02-19	NA	0.04	LiDAR	1.463	2.768	0.68	8.37	12.172	2.08	17.5783	3.75	10.049	2.085	436	5.3	16.0333	12.2
Beach and cliff retreat induced by storm groups at Forte Novo, Algarve (Portugal)	2011-01-01	Journal of Coastal Research	NA	Nunes	Mara	Forte Novo	NA	Atlantic	Europe	Portugal	400	sand, sandstone	TRUE	FALSE	FALSE	FALSE	NA	NA	10	5	12	5	180	weak	NA	1.1	NA	NA	NA	36.6667	2010-02-19	2010-03-01	NA	0.03	LiDAR	1.463	2.768	0.68	8.37	12.172	2.08	17.5783	3.75	10.049	2.085	436	5.3	16.0333	12.2
The interaction between marine and subaerial processes in the evolution of rocky coasts: The example of Castelejo (southwest Portugal)	1999-01-01	Boletin - Instituto Espagnol de Oceanographia	NA	Neves	Mario	Castelejo A	NA	Atlantic	Europe	Portugal	NA	flysh	FALSE	FALSE	FALSE	FALSE	130	NA	NA	67.5	134	67.5	180	strong	NA	6	NA	NA	NA	0.85592	1982-01-01	1989-01-01	NA	7.01	aerial photography	1.778	3.307	0.79	8.756	12.532	2.092	27.1601	3.75	10.049	2.072	447	2.1	16.3667	11.3
Anthropogenic modifications in the erosional rhythm of a coastal cliff. Rocha do Gronho (western coast of Portugal)	2008-01-01	Journal of Iberian Geology	NA	Neves	Mario	Rocha do Gronho	North sea	Atlantic	Europe	Portugal	200	conglomerate	FALSE	FALSE	FALSE	FALSE	NA	NA	35	14.3	32	14.3	180	strong	0.15	NA	NA	NA	NA	0.15	1947-01-01	1991-01-01	NA	44.03	aerial photography	1.937	3.693	0.9	9.074	12.668	2.061	33.4057	4	10.236	2.091	659	3.1	15.8917	11.1
Anthropogenic modifications in the erosional rhythm of a coastal cliff. Rocha do Gronho (western coast of Portugal)	2008-01-01	Journal of Iberian Geology	NA	Neves	Mario	Rocha do Gronho	North sea	Atlantic	Europe	Portugal	200	sandstone	FALSE	FALSE	FALSE	FALSE	NA	NA	35	14.3	32	14.3	180	strong	0.15	NA	NA	NA	NA	0.15	1947-01-01	1991-01-01	NA	44.03	aerial photography	1.937	3.693	0.9	9.074	12.668	2.061	33.4057	4	10.236	2.091	659	3.1	15.8917	11.1
Sea-cliff erosion and retreat in semi-enclosed macrotidal embayement : Hampyung bay, west coast of Korea	2009-01-01	Journal of Coastal Research	NA	Lim	D.I.	Haeunri	Yellow Sea	Pacific	Asia	South Korea	NA	granite, gneiss	FALSE	TRUE	FALSE	FALSE	NA	NA	NA	17.1	45	17.1	180	strong	NA	NA	NA	2	1	NA	1976-01-01	1990-01-01	NA	14.01	aerial photography	0.408	0.978	0.287	3.185	4.277	0.6	0.520226	1.75	25.471	2.994	1320	61.3	13.475	24.8
Sea-cliff erosion and retreat in semi-enclosed macrotidal embayement : Hampyung bay, west coast of Korea	2009-01-01	Journal of Coastal Research	NA	Lim	D.I.	Haeunri	Yellow Sea	Pacific	Asia	South Korea	NA	granite, gneiss	FALSE	TRUE	FALSE	FALSE	NA	NA	NA	17.1	45	17.1	180	strong	NA	NA	NA	2	0.5	NA	2001-01-01	2002-01-01	NA	1	Field survey	0.408	0.978	0.287	3.185	4.277	0.6	0.520226	1.75	25.471	2.994	1320	61.3	13.475	24.8
Sediment contribution from Israel's coastal cliffs into the Nile's littoral cell and its significance to cliff-retreat mitigation efforts	2016-12-01	Engineering Geology	10.1016/j.enggeo.2016.11.005	Mushkin	Amit	Ein Yamm	Mediterranean	NA	NA	Israel	2500	aeolianite	FALSE	FALSE	FALSE	FALSE	NA	NA	14	10.4	22	10.4	180	weak	NA	NA	728.314	NA	NA	0.020809	2006-01-01	2015-01-01	8.9	8.9	LiDAR	0.805	1.768	0.503	5.161	7.546	1.252	3.28162	3.5	10.931	0.252	344	4.1	19.3917	13.3
Sediment contribution from Israel's coastal cliffs into the Nile's littoral cell and its significance to cliff-retreat mitigation efforts	2016-12-01	Engineering Geology	10.1016/j.enggeo.2016.11.005	Mushkin	Amit	Neurim	Mediterranean	NA	NA	Israel	6100	aeolianite	FALSE	FALSE	FALSE	FALSE	NA	NA	26	17.4	49	17.4	180	weak	NA	NA	366.727	NA	NA	0.00231228	2001-01-01	2002-01-01	8.9	8.9	LiDAR	0.805	1.768	0.503	5.161	7.546	1.252	3.28162	3.5	10.931	0.247	344	4.1	19.3917	13.3
Sediment contribution from Israel's coastal cliffs into the Nile's littoral cell and its significance to cliff-retreat mitigation efforts	2016-12-01	Engineering Geology	10.1016/j.enggeo.2016.11.005	Mushkin	Amit	Natanya South	Mediterranean	NA	NA	Israel	4600	aeolianite	FALSE	FALSE	FALSE	FALSE	NA	NA	30	24.5	51	24.5	180	weak	NA	NA	600.456	NA	NA	0.00435113	2001-01-01	2002-01-01	8.9	8.9	LiDAR	0.805	1.768	0.503	5.161	7.546	1.252	3.28162	3.5	10.931	0.242	344	4.1	19.3917	13.3
Sediment contribution from Israel's coastal cliffs into the Nile's littoral cell and its significance to cliff-retreat mitigation efforts	2016-12-01	Engineering Geology	10.1016/j.enggeo.2016.11.005	Mushkin	Amit	Gaash	Mediterranean	NA	NA	Israel	18800	aeolianite	FALSE	FALSE	FALSE	FALSE	NA	NA	26	22.8	45	22.8	180	weak	NA	NA	713.811	NA	NA	0.00146033	2001-01-01	2002-01-01	8.9	8.9	LiDAR	0.805	1.768	0.503	5.161	7.546	1.252	3.28162	3.5	10.931	0.242	344	4.1	19.3917	13.3
Morphodynamique des littoraux de la Réunion - phase 2	2006-11-01	NA	BRGM/RP-55014-FR	de la Torre	Yann	Sainte suzanne	NA	Indian	NA	France	NA	basalt	FALSE	FALSE	FALSE	FALSE	30	NA	NA	24.1	44	24.1	180	medium	NA	18	NA	NA	NA	0.719424	1978-01-01	2003-01-01	NA	25.02	aerial photography	NA	NA	NA	NA	NA	NA	NA	NA	NA	0.407	1710	9.2	21.075	5.7
Morphodynamique des littoraux de la Réunion - phase 2	2006-11-01	NA	BRGM/RP-55014-FR	de la Torre	Yann	Sainte suzanne	NA	Indian	NA	France	NA	Lahar deposits	FALSE	FALSE	FALSE	FALSE	30	NA	NA	24.1	44	24.1	180	weak	NA	18	NA	NA	NA	0.719424	1978-01-01	2003-01-01	NA	25.02	aerial photography	NA	NA	NA	NA	NA	NA	NA	NA	NA	0.407	1710	9.2	21.075	5.7
Morphodynamique des littoraux de la Réunion - phase 2	2006-11-01	NA	BRGM/RP-55014-FR	de la Torre	Yann	Saint Philippe - la mer Cassée	NA	Indian	NA	France	NA	basalt, scories	FALSE	FALSE	FALSE	TRUE	NA	NA	NA	49.3	104	49.3	180	weak	NA	13	NA	NA	NA	0.519584	1978-01-01	2003-01-01	NA	25.02	aerial photography	NA	NA	NA	NA	NA	NA	NA	NA	NA	0.43	1678	7.1	21.0917	5.4
Morphodynamique des littoraux de la Réunion - phase 2	2006-11-01	NA	BRGM/RP-55014-FR	de la Torre	Yann	Grand Bois	NA	Indian	NA	France	NA	basalt, scories	FALSE	FALSE	FALSE	TRUE	NA	NA	NA	50.6	122	50.6	180	weak	NA	0	NA	NA	NA	0	1978-01-01	2003-01-01	NA	25.02	aerial photography	NA	NA	NA	NA	NA	NA	NA	NA	NA	0.396	1678	7.1	21.0917	5.4
Morphodynamique des littoraux de la Réunion - phase 2	2006-11-01	NA	BRGM/RP-55014-FR	de la Torre	Yann	Saint Pierre : La pointe du diable	NA	NA	NA	NA	NA	tuff	FALSE	FALSE	FALSE	FALSE	NA	NA	15	26	53	26	180	weak	NA	20	NA	NA	NA	0.799361	1978-01-01	2003-01-01	NA	25.02	aerial photography	NA	NA	NA	NA	NA	NA	NA	NA	NA	0.396	1769	19.9	18.6083	5.8
Vitesse d'évolution et dynamique des falaises basaltiques de l'ïle d'Hawaï	2003-01-01	Hommes et Terres du Nord	NA	Marie	Guillaume	Kamaomoa	NA	Pacific	NA	USA	3000		FALSE	FALSE	FALSE	FALSE	NA	NA	NA	20.4	39	20.4	180	weak	NA	85	NA	NA	NA	17.7824	1997-12-20	2002-09-29	NA	4.78	DGPS	2.014	2.88	0.459	9.032	11.455	1.25	35.9472	4.25	9.274	0.549	1759	10.6	22.4417	3.1
Rate and mode of retrogradation on rocky coasts in Victoria, Australia, and their relationship to sea level changes	1973-06-05	Boreas	NA	Gill	Edmund D.	Basalt coast	NA	Pacific	Oceania	Australia	8000	basalt	TRUE	FALSE	FALSE	FALSE	NA	NA	30	8.2	42	8.2	90	strong	0.001	NA	NA	NA	NA	0.001	NA	NA	NA	NA	geomorphology	2.869	4.681	0.941	10.53	12.879	1.401	85.0455	2.75	14.914	0.494	646	17.1	14.1417	8.9
Rate and mode of retrogradation on rocky coasts in Victoria, Australia, and their relationship to sea level changes	1973-06-05	Boreas	NA	Gill	Edmund D.	Aeolianite coast	NA	Pacific	Oceania	Australia	25	aeolianite	FALSE	TRUE	TRUE	FALSE	NA	NA	60	28.5	131	28.5	100	weak	0.04	NA	NA	NA	NA	0.04	NA	NA	6000	6000	geomorphology	2.599	4.272	0.861	10.125	12.493	1.401	67.1073	2.75	15.368	0.589	739	22.1	13.425	8.2
Rate and mode of retrogradation on rocky coasts in Victoria, Australia, and their relationship to sea level changes	1973-06-05	Boreas	NA	Gill	Edmund D.	Aeolianite coast	NA	Pacific	Oceania	Australia	25	aeolianite	FALSE	TRUE	TRUE	FALSE	NA	NA	60	28.5	131	28.5	100	weak	0.04	NA	NA	NA	NA	0.04	NA	NA	6000	6000	geomorphology	2.599	4.272	0.861	10.125	12.493	1.401	67.1073	2.75	15.368	0.589	739	22.1	13.425	8.2
Rate and mode of retrogradation on rocky coasts in Victoria, Australia, and their relationship to sea level changes	1973-06-05	Boreas	NA	Gill	Edmund D.	Arkose and siltstone coast Australia	NA	Pacific	Oceania	Australia	NA		TRUE	FALSE	FALSE	TRUE	NA	NA	NA	52.2	213	52.2	40	strong	1	NA	NA	1.75	0.9	1	NA	NA	6000	6000	geomorphology	2.599	4.272	0.861	10.125	12.493	1.401	67.1073	2.75	15.368	0.836	726	25.9	13.1167	8.4
Rate and mode of retrogradation on rocky coasts in Victoria, Australia, and their relationship to sea level changes	1973-06-05	Boreas	NA	Gill	Edmund D.	Arkose and siltstone coast Australia	NA	Pacific	Oceania	Australia	NA		TRUE	FALSE	FALSE	TRUE	NA	NA	NA	52.2	213	52.2	40	strong	1	NA	NA	1.75	0.9	1	NA	NA	6000	6000	geomorphology	2.599	4.272	0.861	10.125	12.493	1.401	67.1073	2.75	15.368	0.836	726	25.9	13.1167	8.4
Coastal cliff bahaviour : Observations on the relationship between beach levels and recession rates	2008-01-03	Geomorphology	10.1016/j.geomorph.2008.02.010	Lee	E.M.	Northfolk	North sea	Atlantic	Europe	UK	NA	glacial deposits	FALSE	FALSE	FALSE	FALSE	56	17	29	27.8	68	27.8	283	weak	1.35	NA	NA	2.55	0.1	1.35	1992-01-01	2003-01-01	NA	11.01	Peg transect (gps) averaged	1.261	2.724	0.742	5.48	7.596	1.185	8.55013	2.25	19.671	2.624	516	55.6	9.35833	12.5
Coastal cliff bahaviour : Observations on the relationship between beach levels and recession rates	2008-01-03	Geomorphology	10.1016/j.geomorph.2008.02.010	Lee	E.M.	Suffolk	North sea	Atlantic	Europe	UK	NA	sand , gravels	FALSE	FALSE	FALSE	FALSE	19	6	10	7	21	7	25	weak	3.97	NA	NA	7.72	0.15	3.97	1992-01-01	2003-01-01	NA	11.01	Peg transect (gps) averaged	0.981	2.216	0.615	4.867	6.606	1.014	4.5958	2	21.168	1.518	595	50.7	9.73333	12.9
Cliffline recession near kilkeel N. Ireland ; an example of a dynamic coastal system	1979-01-01	Geografiska Annaler. Series A, Physical Geography	10.2307/520914	McGreal	W.S.	Ballymartin	Irish sea	Atlantic	Europe	Ireland	NA	glacial deposits	FALSE	FALSE	FALSE	FALSE	15	5	NA	11.6	22	11.6	57	weak	0.27	NA	NA	NA	NA	0.27	01/01/1834	1962-01-01	NA	128.08	aerial photography (transect) averaged	1.233	2.958	0.868	4.96	7.092	1.187	7.39895	2	19.885	3.347	849	62.1	8.99167	10
Cliffline recession near kilkeel N. Ireland ; an example of a dynamic coastal system	1979-01-01	Geografiska Annaler. Series A, Physical Geography	10.2307/520914	McGreal	W.S.	Kilkeel	Irish sea	Atlantic	Europe	Ireland	NA	glacial deposits	FALSE	FALSE	FALSE	FALSE	15	5	NA	19	32	19	51	weak	0.48	NA	NA	NA	NA	0.48	01/01/1834	1962-01-01	NA	128.08	aerial photography (transect) averaged	1.233	2.958	0.868	4.96	7.092	1.187	7.39895	2	19.885	3.373	849	62.1	8.99167	10
Short and medium-term evolution of a coastal sector in Cadiz, SW Spain	2007-07-01	Catena	10.1016/j.catena.2006.09.002	Anfuso	Giorgio	Cadiz	Mediterranean	NA	Europe	Spain	NA	claystone	FALSE	FALSE	FALSE	FALSE	NA	NA	NA	6	10	6	120	medium	NA	8.62	NA	NA	NA	0.358868	1977-01-01	2001-01-01	NA	24.02	aerial photography (transect) averaged	1.144	2.207	0.558	8.249	12.173	2.182	10.5929	3.75	9.488	2.174	388	5.8	18	13.6
Short and medium-term evolution of a coastal sector in Cadiz, SW Spain	2007-07-01	Catena	10.1016/j.catena.2006.09.002	Anfuso	Giorgio	Cadiz	Mediterranean	NA	Europe	Spain	NA	sand, clay	FALSE	FALSE	FALSE	FALSE	NA	NA	NA	6	10	6	120	weak	NA	8.62	NA	NA	NA	0.358868	1977-01-01	2001-01-01	NA	24.02	aerial photography (transect) averaged	1.144	2.207	0.558	8.249	12.173	2.182	10.5929	3.75	9.488	2.174	388	5.8	18	13.6
Spatial and temporal variations in soft-cliff erosion along the Holderness coast, East Riding of Yorkshire, UK	2015-12-01	Journal of Coastal Conservation	10.1007/s11852-015-0378-8	Pye	Kenneth	Holderness coast	North sea	Atlantic	Europe	UK	60500	glacial deposits	FALSE	FALSE	FALSE	FALSE	38	3	NA	10.1	34	10.1	327	weak	1.26	NA	NA	NA	NA	1.26	01/01/1852	1908-01-01	NA	56.04	comparison historic maps / aerial photography (transect) averaged	1.251	2.668	0.728	5.632	8.001	1.29	8.64847	2.25	19.618	3.787	570	61.5	9.34167	12.2
Spatial and temporal variations in soft-cliff erosion along the Holderness coast, East Riding of Yorkshire, UK	2015-12-01	Journal of Coastal Conservation	10.1007/s11852-015-0378-8	Pye	Kenneth	Holderness coast	North sea	Atlantic	Europe	UK	60500	glacial deposits	FALSE	FALSE	FALSE	FALSE	38	3	NA	10.1	34	10.1	327	weak	1.07	NA	NA	NA	NA	1.07	1908-01-01	1951-01-01	NA	43.03	comparison historic maps / aerial photography (transect) averaged	1.251	2.668	0.728	5.632	8.001	1.29	8.64847	2.25	19.618	3.787	570	61.5	9.34167	12.2
Spatial and temporal variations in soft-cliff erosion along the Holderness coast, East Riding of Yorkshire, UK	2015-12-01	Journal of Coastal Conservation	10.1007/s11852-015-0378-8	Pye	Kenneth	Holderness coast	North sea	Atlantic	Europe	UK	60500	glacial deposits	FALSE	FALSE	FALSE	FALSE	38	3	NA	10.1	34	10.1	327	weak	1.34	NA	NA	NA	NA	1.34	1951-01-01	1989-01-01	NA	38.03	metal pin averaged	1.251	2.668	0.728	5.632	8.001	1.29	8.64847	2.25	19.618	3.787	570	61.5	9.34167	12.2
Spatial and temporal variations in soft-cliff erosion along the Holderness coast, East Riding of Yorkshire, UK	2015-12-01	Journal of Coastal Conservation	10.1007/s11852-015-0378-8	Pye	Kenneth	Holderness coast	North sea	Atlantic	Europe	UK	60500	glacial deposits	FALSE	FALSE	FALSE	FALSE	38	3	NA	10.1	34	10.1	327	weak	1.77	NA	NA	NA	NA	1.77	1989-01-01	2013-01-01	NA	24.02	metal pin averaged	1.251	2.668	0.728	5.632	8.001	1.29	8.64847	2.25	19.618	3.787	570	61.5	9.34167	12.2
East Riding of Yorkshire Council Coastal Explorer	2015-01-01	NA	NA	Yorkshire	Council	Yorkshire	North sea	Atlantic	Europe	UK	NA	till	FALSE	FALSE	FALSE	FALSE	35	4	15	20.1	124	20.1	327	weak	2.16	NA	NA	NA	NA	2.16	2014-11-01	2015-09-01	NA	0.83	LiDAR and GPS (transects) averaged	1.251	2.668	0.728	5.632	8.001	1.29	8.64847	2.25	19.618	3.787	575	66.9	8.83333	12
East Riding of Yorkshire Council Coastal Explorer	2015-01-01	NA	NA	Yorkshire	Council	Yorkshire	North sea	Atlantic	Europe	UK	NA	till	FALSE	FALSE	FALSE	FALSE	35	4	15	20.1	124	20.1	327	weak	1.24	NA	NA	NA	NA	1.24	01/01/1852	1989-01-01	NA	137.09	comparison historic maps / aerial photography (transect) averaged	1.251	2.668	0.728	5.632	8.001	1.29	8.64847	2.25	19.618	3.787	575	66.9	8.83333	12
East Riding of Yorkshire Council Coastal Explorer	2015-01-01	NA	NA	Yorkshire	Council	Yorkshire	North sea	Atlantic	Europe	UK	NA	till	FALSE	FALSE	FALSE	FALSE	35	4	15	20.1	124	20.1	327	weak	1.84	NA	NA	NA	NA	1.84	1989-01-01	2015-01-01	NA	26.02	comparison historic maps / aerial photography (transect) averaged	1.251	2.668	0.728	5.632	8.001	1.29	8.64847	2.25	19.618	3.787	575	66.9	8.83333	12
Evolution du trait de côte (histogrammes)	2016-01-29	MEEM	NA	Meem	NA	cerema_0001	mediterranean	NA	Europe	France	200	limestone	FALSE	FALSE	FALSE	FALSE	NA	NA	NA	13.5	23	13.5	144	strong	0.001	NA	NA	0.001	0.001	0.001	1952-01-01	2011-01-01	84.21	84.21	aerial photography (transect) averaged	1.067	2.823	0.846	4.824	7.032	1.266	5.38888	2.25	19.35	0.171	601	19.7	13.8917	16.1
Evolution du trait de côte (histogrammes)	2016-01-29	MEEM	NA	Meem	NA	cerema_0002	mediterranean	NA	Europe	France	1400	limestone	FALSE	FALSE	FALSE	FALSE	NA	NA	NA	8.2	25	8.2	333	strong	0.001	NA	NA	0.001	0.001	0.001	1952-01-01	2011-01-01	87.21	87.21	aerial photography (transect) averaged	0.904	2.313	0.692	4.787	6.921	1.249	3.83851	2.25	19.163	0.19	701	27.1	12.8167	14.9
Evolution du trait de côte (histogrammes)	2016-01-29	MEEM	NA	Meem	NA	cerema_0003	NA	atlantic	Europe	France	2400	granite	FALSE	FALSE	FALSE	FALSE	NA	NA	NA	3.3	9	3.3	270	strong	0.001	NA	NA	0.001	0.001	0.001	1952-01-01	2011-01-01	57	57	aerial photography (transect) averaged	1.591	3.325	0.881	7.349	10.564	1.737	18.2528	3.25	12.722	5.243	874	18.2	11.1167	10.1
Evolution du trait de côte (histogrammes)	2016-01-29	MEEM	NA	Meem	NA	cerema_0004	NA	atlantic	Europe	France	1600	granite	FALSE	FALSE	FALSE	FALSE	NA	NA	NA	13.7	28	13.7	304	strong	0.01675	NA	NA	0.001	0.107	0.01675	1952-01-01	2011-01-01	57	57	aerial photography (transect) averaged	2.038	4.227	1.105	8.3	11.538	1.827	33.8258	4	9.782	4.673	891	16.9	11.325	9.8
Evolution du trait de côte (histogrammes)	2016-01-29	MEEM	NA	Meem	NA	cerema_0005	NA	atlantic	Europe	France	5200	granite	FALSE	FALSE	FALSE	FALSE	NA	NA	NA	14.9	30	14.9	230	strong	0.0188077	NA	NA	0.001	0.158	0.0188077	1952-01-01	2011-01-01	57	57	aerial photography (transect) averaged	2.038	4.227	1.105	8.3	11.538	1.827	33.8258	4	9.782	4.673	891	16.9	11.325	9.8
Evolution du trait de côte (histogrammes)	2016-01-29	MEEM	NA	Meem	NA	cerema_0006	NA	atlantic	Europe	France	2800	granite	FALSE	FALSE	FALSE	FALSE	NA	NA	NA	8.3	17	8.3	248	strong	0.0201429	NA	NA	0.001	0.144	0.0201429	1952-01-01	2011-01-01	57	57	aerial photography (transect) averaged	2.038	4.227	1.105	8.3	11.538	1.827	33.8258	4	9.782	4.398	891	16.9	11.325	9.8
Evolution du trait de côte (histogrammes)	2016-01-29	MEEM	NA	Meem	NA	cerema_0007	NA	atlantic	Europe	France	600	gneiss	FALSE	FALSE	FALSE	FALSE	NA	NA	NA	4.3	9	4.3	193	strong	0.001	NA	NA	0.001	0.001	0.001	1952-01-01	2011-01-01	59	59	aerial photography (transect) averaged	1.835	3.876	1.016	8.452	11.616	1.825	27.925	4.25	9.622	3.165	765	11.2	11.7	10.4
Evolution du trait de côte (histogrammes)	2016-01-29	MEEM	NA	Meem	NA	cerema_0008	NA	atlantic	Europe	France	200	gneiss	FALSE	FALSE	FALSE	FALSE	NA	NA	NA	13.2	23	13.2	112	strong	0.001	NA	NA	0.001	0.001	0.001	1952-01-01	2011-01-01	59	59	aerial photography (transect) averaged	1.835	3.876	1.016	8.452	11.616	1.825	27.925	4.25	9.622	3.165	765	11.2	11.7	10.4
Evolution du trait de côte (histogrammes)	2016-01-29	MEEM	NA	Meem	NA	cerema_0009	NA	atlantic	Europe	France	600	granite	FALSE	FALSE	FALSE	FALSE	NA	NA	NA	12.9	24	12.9	160	strong	0.001	NA	NA	0.001	0.001	0.001	1952-01-01	2011-01-01	59	59	aerial photography (transect) averaged	1.835	3.876	1.016	8.452	11.616	1.825	27.925	4.25	9.622	3.165	765	11.2	11.7	10.4
Evolution du trait de côte (histogrammes)	2016-01-29	MEEM	NA	Meem	NA	cerema_0010	NA	atlantic	Europe	France	600	granite	FALSE	FALSE	FALSE	FALSE	NA	NA	NA	7.1	16	7.1	147	strong	0.001	NA	NA	0.001	0.001	0.001	1952-01-01	2011-01-01	59	59	aerial photography (transect) averaged	1.835	3.876	1.016	8.452	11.616	1.825	27.925	4.25	9.622	3.165	765	11.2	11.7	10.4
Evolution du trait de côte (histogrammes)	2016-01-29	MEEM	NA	Meem	NA	cerema_0011	mediterranean	NA	Europe	France	800		FALSE	FALSE	FALSE	FALSE	NA	NA	NA	23.4	44	23.4	337	weak	0.0235	NA	NA	0.001	0.091	0.0235	1952-01-01	2011-01-01	87.21	87.21	aerial photography (transect) averaged	0.904	2.313	0.692	4.787	6.921	1.249	3.83851	2.25	19.163	0.19	701	27.1	12.8167	14.9
Evolution du trait de côte (histogrammes)	2016-01-29	MEEM	NA	Meem	NA	cerema_0012	NA	atlantic	Europe	France	200	granite	FALSE	FALSE	FALSE	FALSE	NA	NA	NA	18.6	30	18.6	72	strong	0.001	NA	NA	0.001	0.001	0.001	1952-01-01	2011-01-01	57	57	aerial photography (transect) averaged	2.246	4.644	1.211	8.48	11.718	1.835	41.9737	4	9.889	4.249	864	14.6	11.4833	9.7
Evolution du trait de côte (histogrammes)	2016-01-29	MEEM	NA	Meem	NA	cerema_0013	NA	atlantic	Europe	France	4000	granite	FALSE	FALSE	FALSE	FALSE	NA	NA	NA	13.7	30	13.7	90	strong	0.001	NA	NA	0.001	0.001	0.001	1952-01-01	2011-01-01	57	57	aerial photography (transect) averaged	2.246	4.644	1.211	8.48	11.718	1.835	41.9737	4	9.889	4.125	864	14.6	11.4833	9.7
Evolution du trait de côte (histogrammes)	2016-01-29	MEEM	NA	Meem	NA	cerema_0014	NA	atlantic	Europe	France	1800	sandstone	FALSE	FALSE	FALSE	FALSE	NA	NA	NA	30.1	58	30.1	210	strong	0.001	NA	NA	0.001	0.001	0.001	1952-01-01	2011-01-01	57	57	aerial photography (transect) averaged	1.851	3.907	1.023	8.459	11.626	1.826	28.4377	4.25	9.595	4.049	864	14.6	11.4833	9.7
Evolution du trait de côte (histogrammes)	2016-01-29	MEEM	NA	Meem	NA	cerema_0015	NA	atlantic	Europe	France	2200	sandstone	FALSE	FALSE	FALSE	FALSE	NA	NA	NA	18.9	36	18.9	233	strong	0.001	NA	NA	0.001	0.001	0.001	1952-01-01	2011-01-01	57	57	aerial photography (transect) averaged	1.851	3.907	1.023	8.459	11.626	1.826	28.4377	4.25	9.595	4.049	864	14.6	11.4833	9.7
Evolution du trait de côte (histogrammes)	2016-01-29	MEEM	NA	Meem	NA	cerema_0016	NA	atlantic	Europe	France	3400	sandstone	FALSE	FALSE	FALSE	FALSE	NA	NA	NA	26.4	54	26.4	193	strong	0.001	NA	NA	0.001	0.001	0.001	1952-01-01	2011-01-01	57	57	aerial photography (transect) averaged	1.851	3.907	1.023	8.459	11.626	1.826	28.4377	4.25	9.595	4.049	864	14.6	11.4833	9.7
Evolution du trait de côte (histogrammes)	2016-01-29	MEEM	NA	Meem	NA	cerema_0017	NA	atlantic	Europe	France	5000	sandstone	FALSE	FALSE	FALSE	FALSE	NA	NA	NA	33.5	59	33.5	95	strong	0.001	NA	NA	0.001	0.001	0.001	1952-01-01	2011-01-01	57	57	aerial photography (transect) averaged	1.851	3.907	1.023	8.459	11.626	1.826	28.4377	4.25	9.595	4.049	864	14.6	11.4833	9.7
Evolution du trait de côte (histogrammes)	2016-01-29	MEEM	NA	Meem	NA	cerema_0018	NA	atlantic	Europe	France	200	undifferentiated recent marine deposits	FALSE	FALSE	FALSE	FALSE	NA	NA	NA	8.8	23	8.8	31	weak	0.001	NA	NA	0.001	0.001	0.001	1952-01-01	2011-01-01	57	57	aerial photography (transect) averaged	1.851	3.907	1.023	8.459	11.626	1.826	28.4377	4.25	9.595	4.049	864	14.6	11.4833	9.7
Evolution du trait de côte (histogrammes)	2016-01-29	MEEM	NA	Meem	NA	cerema_0019	NA	atlantic	Europe	France	800	sandstone	FALSE	FALSE	FALSE	FALSE	NA	NA	NA	16.9	45	16.9	111	strong	0.001	NA	NA	0.001	0.001	0.001	1952-01-01	2011-01-01	57	57	aerial photography (transect) averaged	1.851	3.907	1.023	8.459	11.626	1.826	28.4377	4.25	9.595	4.049	864	14.6	11.4833	9.7
Evolution du trait de côte (histogrammes)	2016-01-29	MEEM	NA	Meem	NA	cerema_0020	NA	atlantic	Europe	France	3400	metamorphic	FALSE	FALSE	FALSE	FALSE	NA	NA	NA	30.8	66	30.8	170	strong	0.001	NA	NA	0.001	0.001	0.001	1952-01-01	2011-01-01	57	57	aerial photography (transect) averaged	1.851	3.907	1.023	8.459	11.626	1.826	28.4377	4.25	9.595	4.049	864	14.6	11.4833	9.7
Evolution du trait de côte (histogrammes)	2016-01-29	MEEM	NA	Meem	NA	cerema_0021	NA	atlantic	Europe	France	800	granite	FALSE	FALSE	FALSE	FALSE	NA	NA	NA	4.4	13	4.4	238	strong	0.001	NA	NA	0.001	0.001	0.001	1952-01-01	2011-01-01	57	57	aerial photography (transect) averaged	2.038	4.227	1.105	8.3	11.538	1.827	33.8258	4	9.782	4.398	891	16.9	11.325	9.8
Evolution du trait de côte (histogrammes)	2016-01-29	MEEM	NA	Meem	NA	cerema_0022	NA	atlantic	Europe	France	2200	granite	FALSE	FALSE	FALSE	FALSE	NA	NA	NA	11.4	31	11.4	224	strong	0.0119091	NA	NA	0.001	0.062	0.0119091	1952-01-01	2011-01-01	57	57	aerial photography (transect) averaged	2.038	4.227	1.105	8.3	11.538	1.827	33.8258	4	9.782	4.398	864	14.6	11.4833	9.7
Evolution du trait de côte (histogrammes)	2016-01-29	MEEM	NA	Meem	NA	cerema_0023	mediterranean	NA	Europe	France	800	limestone	FALSE	FALSE	FALSE	FALSE	NA	NA	NA	21.9	64	21.9	194	strong	0.001	NA	NA	0.001	0.001	0.001	1952-01-01	2011-01-01	84.21	84.21	aerial photography (transect) averaged	1.067	2.823	0.846	4.824	7.032	1.266	5.38888	2.25	19.35	0.175	601	19.7	13.8917	16.1
Evolution du trait de côte (histogrammes)	2016-01-29	MEEM	NA	Meem	NA	cerema_0024	NA	atlantic	Europe	France	400	granite	FALSE	FALSE	FALSE	FALSE	NA	NA	NA	6.8	16	6.8	104	strong	0.001	NA	NA	0.001	0.001	0.001	1952-01-01	2011-01-01	57	57	aerial photography (transect) averaged	2.038	4.227	1.105	8.3	11.538	1.827	33.8258	4	9.782	4.398	864	14.6	11.4833	9.7
Evolution du trait de côte (histogrammes)	2016-01-29	MEEM	NA	Meem	NA	cerema_0025	NA	atlantic	Europe	France	200	aeolianite	FALSE	FALSE	FALSE	FALSE	NA	NA	NA	2	3	2	245	weak	0.001	NA	NA	0.001	0.001	0.001	1952-01-01	2011-01-01	57	57	aerial photography (transect) averaged	2.038	4.227	1.105	8.3	11.538	1.827	33.8258	4	9.782	4.398	864	14.6	11.4833	9.7
Evolution du trait de côte (histogrammes)	2016-01-29	MEEM	NA	Meem	NA	cerema_0026	NA	atlantic	Europe	France	1400	granite	FALSE	FALSE	FALSE	FALSE	NA	NA	NA	22.6	39	22.6	216	strong	0.001	NA	NA	0.001	0.001	0.001	1952-01-01	2011-01-01	57	57	aerial photography (transect) averaged	2.038	4.227	1.105	8.3	11.538	1.827	33.8258	4	9.782	4.186	864	14.6	11.4833	9.7
Evolution du trait de côte (histogrammes)	2016-01-29	MEEM	NA	Meem	NA	cerema_0027	NA	atlantic	Europe	France	400	undifferentiated recent marine deposits	FALSE	FALSE	FALSE	FALSE	NA	NA	NA	28.8	43	28.8	143	weak	0.001	NA	NA	0.001	0.001	0.001	1952-01-01	2011-01-01	57	57	aerial photography (transect) averaged	2.038	4.227	1.105	8.3	11.538	1.827	33.8258	4	9.782	4.186	864	14.6	11.4833	9.7
Evolution du trait de côte (histogrammes)	2016-01-29	MEEM	NA	Meem	NA	cerema_0028	NA	atlantic	Europe	France	400	undifferentiated recent marine deposits	FALSE	FALSE	FALSE	FALSE	NA	NA	NA	26	26	26	99	weak	0.001	NA	NA	0.001	0.001	0.001	1952-01-01	2011-01-01	57	57	aerial photography (transect) averaged	2.038	4.227	1.105	8.3	11.538	1.827	33.8258	4	9.782	4.186	864	14.6	11.4833	9.7
Evolution du trait de côte (histogrammes)	2016-01-29	MEEM	NA	Meem	NA	cerema_0029	NA	atlantic	Europe	France	3000	gneiss	FALSE	FALSE	FALSE	FALSE	NA	NA	NA	26	47	26	170	strong	0.006	NA	NA	0.001	0.076	0.006	1952-01-01	2011-01-01	57	57	aerial photography (transect) averaged	2.038	4.227	1.105	8.3	11.538	1.827	33.8258	4	9.782	4.186	864	14.6	11.4833	9.7
Evolution du trait de côte (histogrammes)	2016-01-29	MEEM	NA	Meem	NA	cerema_0030	NA	atlantic	Europe	France	200	undifferentiated recent marine deposits	FALSE	FALSE	FALSE	FALSE	NA	NA	NA	22.9	38	22.9	93	weak	0.001	NA	NA	0.001	0.001	0.001	1952-01-01	2011-01-01	57	57	aerial photography (transect) averaged	2.038	4.227	1.105	8.3	11.538	1.827	33.8258	4	9.782	4.186	864	14.6	11.4833	9.7
Evolution du trait de côte (histogrammes)	2016-01-29	MEEM	NA	Meem	NA	cerema_0031	NA	atlantic	Europe	France	1200	gneiss	FALSE	FALSE	FALSE	FALSE	NA	NA	NA	20.6	35	20.6	169	strong	0.001	NA	NA	0.001	0.001	0.001	1952-01-01	2011-01-01	57	57	aerial photography (transect) averaged	2.038	4.227	1.105	8.3	11.538	1.827	33.8258	4	9.782	4.186	864	14.6	11.4833	9.7
Evolution du trait de côte (histogrammes)	2016-01-29	MEEM	NA	Meem	NA	cerema_0032	NA	atlantic	Europe	France	200	undifferentiated recent marine deposits	FALSE	FALSE	FALSE	FALSE	NA	NA	NA	24.6	36	24.6	127	weak	0.001	NA	NA	0.001	0.001	0.001	1952-01-01	2011-01-01	57	57	aerial photography (transect) averaged	1.851	3.907	1.023	8.459	11.626	1.826	28.4377	4.25	9.595	4.186	864	14.6	11.4833	9.7
Evolution du trait de côte (histogrammes)	2016-01-29	MEEM	NA	Meem	NA	cerema_0033	NA	atlantic	Europe	France	9400	gneiss	FALSE	FALSE	FALSE	FALSE	NA	NA	NA	23.6	51	23.6	100	strong	0.001	NA	NA	0.001	0.001	0.001	1952-01-01	2011-01-01	57	57	aerial photography (transect) averaged	1.851	3.907	1.023	8.459	11.626	1.826	28.4377	4.25	9.595	4.186	864	14.6	11.4833	9.7
Evolution du trait de côte (histogrammes)	2016-01-29	MEEM	NA	Meem	NA	cerema_0034	NA	atlantic	Europe	France	800	gneiss	FALSE	FALSE	FALSE	FALSE	NA	NA	NA	18.1	41	18.1	85	strong	0.001	NA	NA	0.001	0.001	0.001	1952-01-01	2011-01-01	57	57	aerial photography (transect) averaged	1.851	3.907	1.023	8.459	11.626	1.826	28.4377	4.25	9.595	4.049	864	14.6	11.4833	9.7
Evolution du trait de côte (histogrammes)	2016-01-29	MEEM	NA	Meem	NA	cerema_0035	NA	atlantic	Europe	France	600	gneiss	FALSE	FALSE	FALSE	FALSE	NA	NA	NA	26	48	26	109	strong	0.001	NA	NA	0.001	0.001	0.001	1952-01-01	2011-01-01	57	57	aerial photography (transect) averaged	1.851	3.907	1.023	8.459	11.626	1.826	28.4377	4.25	9.595	4.049	864	14.6	11.4833	9.7
Evolution du trait de côte (histogrammes)	2016-01-29	MEEM	NA	Meem	NA	cerema_0036	NA	atlantic	Europe	France	1400	gneiss	FALSE	FALSE	FALSE	FALSE	NA	NA	NA	27.8	54	27.8	105	strong	0.001	NA	NA	0.001	0.001	0.001	1952-01-01	2011-01-01	57	57	aerial photography (transect) averaged	1.851	3.907	1.023	8.459	11.626	1.826	28.4377	4.25	9.595	NA	864	14.6	11.4833	9.7
Evolution du trait de côte (histogrammes)	2016-01-29	MEEM	NA	Meem	NA	cerema_0037	NA	atlantic	Europe	France	200	gneiss	FALSE	FALSE	FALSE	FALSE	NA	NA	NA	38.5	64	38.5	87	strong	0.001	NA	NA	0.001	0.001	0.001	1952-01-01	2011-01-01	57	57	aerial photography (transect) averaged	1.851	3.907	1.023	8.459	11.626	1.826	28.4377	4.25	9.595	NA	864	14.6	11.4833	9.7
Evolution du trait de côte (histogrammes)	2016-01-29	MEEM	NA	Meem	NA	cerema_0038	NA	atlantic	Europe	France	800	gneiss	FALSE	FALSE	FALSE	FALSE	NA	NA	NA	18.2	49	18.2	70	strong	0.001	NA	NA	0.001	0.001	0.001	1952-01-01	2011-01-01	57	57	aerial photography (transect) averaged	1.851	3.907	1.023	8.459	11.626	1.826	28.4377	4.25	9.595	NA	864	14.6	11.4833	9.7
Evolution du trait de côte (histogrammes)	2016-01-29	MEEM	NA	Meem	NA	cerema_0039	NA	atlantic	Europe	France	200	aeolianite	FALSE	FALSE	FALSE	FALSE	NA	NA	NA	30.8	58	30.8	115	weak	0.001	NA	NA	0.001	0.001	0.001	1952-01-01	2011-01-01	59	59	aerial photography (transect) averaged	1.851	3.907	1.023	8.459	11.626	1.826	28.4377	4.25	9.595	3.204	821	14.2	11.675	10
Evolution du trait de côte (histogrammes)	2016-01-29	MEEM	NA	Meem	NA	cerema_0040	NA	atlantic	Europe	France	1200	gneiss	FALSE	FALSE	FALSE	FALSE	NA	NA	NA	16.9	33	16.9	99	strong	0.001	NA	NA	0.001	0.001	0.001	1952-01-01	2011-01-01	59	59	aerial photography (transect) averaged	1.851	3.907	1.023	8.459	11.626	1.826	28.4377	4.25	9.595	3.204	821	14.2	11.675	10
Evolution du trait de côte (histogrammes)	2016-01-29	MEEM	NA	Meem	NA	cerema_0041	NA	atlantic	Europe	France	600	metamorphic	FALSE	FALSE	FALSE	FALSE	NA	NA	NA	5.5	9	5.5	138	strong	0.089	NA	NA	0.034	0.129	0.089	1952-01-01	2011-01-01	59	59	aerial photography (transect) averaged	1.851	3.907	1.023	8.459	11.626	1.826	28.4377	4.25	9.595	3.15	821	14.2	11.675	10
Evolution du trait de côte (histogrammes)	2016-01-29	MEEM	NA	Meem	NA	cerema_0042	NA	atlantic	Europe	France	1800	granite	FALSE	FALSE	FALSE	FALSE	NA	NA	NA	6.4	11	6.4	257	strong	0.001	NA	NA	0.001	0.001	0.001	1952-01-01	2011-01-01	59	59	aerial photography (transect) averaged	1.851	3.907	1.023	8.459	11.626	1.826	28.4377	4.25	9.595	3.15	821	14.2	11.675	10
Evolution du trait de côte (histogrammes)	2016-01-29	MEEM	NA	Meem	NA	cerema_0043	NA	atlantic	Europe	France	200	granite	FALSE	FALSE	FALSE	FALSE	NA	NA	NA	4.1	6	4.1	82	strong	0.001	NA	NA	0.001	0.001	0.001	1952-01-01	2011-01-01	59	59	aerial photography (transect) averaged	1.851	3.907	1.023	8.459	11.626	1.826	28.4377	4.25	9.595	3.126	821	14.2	11.675	10
Evolution du trait de côte (histogrammes)	2016-01-29	MEEM	NA	Meem	NA	cerema_0044	mediterranean	NA	Europe	France	200	limestone	FALSE	FALSE	FALSE	FALSE	NA	NA	NA	17	33	17	115	strong	0.001	NA	NA	0.001	0.001	0.001	1952-01-01	2011-01-01	84.21	84.21	aerial photography (transect) averaged	1.067	2.823	0.846	4.824	7.032	1.266	5.38888	2.25	19.35	0.173	556	15.2	14.2583	15.5
Evolution du trait de côte (histogrammes)	2016-01-29	MEEM	NA	Meem	NA	cerema_0045	NA	atlantic	Europe	France	800	aeolianite	FALSE	FALSE	FALSE	FALSE	NA	NA	NA	5	9	5	85	weak	0.001	NA	NA	0.001	0.001	0.001	1952-01-01	2011-01-01	59	59	aerial photography (transect) averaged	1.851	3.907	1.023	8.459	11.626	1.826	28.4377	4.25	9.595	3.114	821	14.2	11.675	10
Evolution du trait de côte (histogrammes)	2016-01-29	MEEM	NA	Meem	NA	cerema_0046	NA	atlantic	Europe	France	400	granite	FALSE	FALSE	FALSE	FALSE	NA	NA	NA	4.5	6	4.5	71	strong	0.001	NA	NA	0.001	0.001	0.001	1952-01-01	2011-01-01	59	59	aerial photography (transect) averaged	1.851	3.907	1.023	8.459	11.626	1.826	28.4377	4.25	9.595	3.114	821	14.2	11.675	10
Evolution du trait de côte (histogrammes)	2016-01-29	MEEM	NA	Meem	NA	cerema_0047	NA	atlantic	Europe	France	400	plutonic	FALSE	FALSE	FALSE	FALSE	NA	NA	NA	21.2	43	21.2	178	strong	0.001	NA	NA	0.001	0.001	0.001	1952-01-01	2011-01-01	57	57	aerial photography (transect) averaged	1.851	3.907	1.023	8.459	11.626	1.826	28.4377	4.25	9.595	4.049	864	14.6	11.4833	9.7
Evolution du trait de côte (histogrammes)	2016-01-29	MEEM	NA	Meem	NA	cerema_0048	NA	atlantic	Europe	France	400	undifferentiated recent marine deposits	FALSE	FALSE	FALSE	FALSE	NA	NA	NA	47.8	81	47.8	204	weak	0.001	NA	NA	0.001	0.001	0.001	1952-01-01	2011-01-01	57	57	aerial photography (transect) averaged	1.851	3.907	1.023	8.459	11.626	1.826	28.4377	4.25	9.595	4.049	864	14.6	11.4833	9.7
Evolution du trait de côte (histogrammes)	2016-01-29	MEEM	NA	Meem	NA	cerema_0049	NA	atlantic	Europe	France	400	metamorphic	FALSE	FALSE	FALSE	FALSE	NA	NA	NA	30.2	59	30.2	100	strong	0.001	NA	NA	0.001	0.001	0.001	1952-01-01	2011-01-01	57	57	aerial photography (transect) averaged	1.851	3.907	1.023	8.459	11.626	1.826	28.4377	4.25	9.595	4.049	860	13.6	10.8583	10
Evolution du trait de côte (histogrammes)	2016-01-29	MEEM	NA	Meem	NA	cerema_0050	NA	atlantic	Europe	France	200	sandstone	FALSE	FALSE	FALSE	FALSE	NA	NA	NA	26.6	49	26.6	136	strong	0.001	NA	NA	0.001	0.001	0.001	1952-01-01	2011-01-01	57	57	aerial photography (transect) averaged	1.851	3.907	1.023	8.459	11.626	1.826	28.4377	4.25	9.595	4.049	860	13.6	10.8583	10
Evolution du trait de côte (histogrammes)	2016-01-29	MEEM	NA	Meem	NA	cerema_0051	mediterranean	NA	Europe	France	7400	limestone	FALSE	FALSE	FALSE	FALSE	NA	NA	NA	86.8	305	86.8	160	strong	0.001	NA	NA	0.001	0.001	0.001	1952-01-01	2011-01-01	84.21	84.21	aerial photography (transect) averaged	1.067	2.823	0.846	4.824	7.032	1.266	5.38888	2.25	19.35	0.175	556	15.2	14.2583	15.5
Evolution du trait de côte (histogrammes)	2016-01-29	MEEM	NA	Meem	NA	cerema_0052	NA	atlantic	Europe	France	1400	metamorphic	FALSE	FALSE	FALSE	FALSE	NA	NA	NA	32.2	56	32.2	100	strong	0.00728571	NA	NA	0.001	0.045	0.00728571	1952-01-01	2011-01-01	57	57	aerial photography (transect) averaged	1.851	3.907	1.023	8.459	11.626	1.826	28.4377	4.25	9.595	4.049	860	13.6	10.8583	10
Evolution du trait de côte (histogrammes)	2016-01-29	MEEM	NA	Meem	NA	cerema_0053	NA	atlantic	Europe	France	400	undifferentiated recent marine deposits	FALSE	FALSE	FALSE	FALSE	NA	NA	NA	8.2	33	8.2	111	weak	0.001	NA	NA	0.001	0.001	0.001	1952-01-01	2011-01-01	57	57	aerial photography (transect) averaged	1.851	3.907	1.023	8.459	11.626	1.826	28.4377	4.25	9.595	4.215	860	13.6	10.8583	10
Evolution du trait de côte (histogrammes)	2016-01-29	MEEM	NA	Meem	NA	cerema_0054	NA	atlantic	Europe	France	2200	sandstone	FALSE	FALSE	FALSE	FALSE	NA	NA	NA	46.1	106	46.1	100	strong	0.001	NA	NA	0.001	0.001	0.001	1952-01-01	2011-01-01	57	57	aerial photography (transect) averaged	1.851	3.907	1.023	8.459	11.626	1.826	28.4377	4.25	9.595	4.215	860	13.6	10.8583	10
Evolution du trait de côte (histogrammes)	2016-01-29	MEEM	NA	Meem	NA	cerema_0055	NA	atlantic	Europe	France	200	metamorphic	FALSE	FALSE	FALSE	FALSE	NA	NA	NA	49.6	105	49.6	106	strong	0.001	NA	NA	0.001	0.001	0.001	1952-01-01	2011-01-01	57	57	aerial photography (transect) averaged	1.851	3.907	1.023	8.459	11.626	1.826	28.4377	4.25	9.595	4.215	860	13.6	10.8583	10
Evolution du trait de côte (histogrammes)	2016-01-29	MEEM	NA	Meem	NA	cerema_0056	NA	atlantic	Europe	France	800	lavas (basalts, etc)	FALSE	FALSE	FALSE	FALSE	NA	NA	NA	23	71	23	100	strong	0.001	NA	NA	0.001	0.001	0.001	1952-01-01	2011-01-01	57	57	aerial photography (transect) averaged	1.851	3.907	1.023	8.459	11.626	1.826	28.4377	4.25	9.595	4.215	860	13.6	10.8583	10
Evolution du trait de côte (histogrammes)	2016-01-29	MEEM	NA	Meem	NA	cerema_0057	NA	atlantic	Europe	France	800	metamorphic	FALSE	FALSE	FALSE	FALSE	NA	NA	NA	38.2	72	38.2	93	strong	0.001	NA	NA	0.001	0.001	0.001	1952-01-01	2011-01-01	57	57	aerial photography (transect) averaged	1.851	3.907	1.023	8.459	11.626	1.826	28.4377	4.25	9.595	4.215	860	13.6	10.8583	10
Evolution du trait de côte (histogrammes)	2016-01-29	MEEM	NA	Meem	NA	cerema_0058	NA	atlantic	Europe	France	200	undifferentiated recent marine deposits	FALSE	FALSE	FALSE	FALSE	NA	NA	NA	11.8	23	11.8	128	weak	0.001	NA	NA	0.001	0.001	0.001	1952-01-01	2011-01-01	57	57	aerial photography (transect) averaged	1.851	3.907	1.023	8.459	11.626	1.826	28.4377	4.25	9.595	4.215	860	13.6	10.8583	10
Evolution du trait de côte (histogrammes)	2016-01-29	MEEM	NA	Meem	NA	cerema_0059	NA	atlantic	Europe	France	6200	metamorphic	FALSE	FALSE	FALSE	FALSE	NA	NA	NA	23	54	23	100	strong	0.001	NA	NA	0.001	0.001	0.001	1952-01-01	2011-01-01	57	57	aerial photography (transect) averaged	1.851	3.907	1.023	8.459	11.626	1.826	28.4377	4.25	9.595	4.215	860	13.6	10.8583	10
Evolution du trait de côte (histogrammes)	2016-01-29	MEEM	NA	Meem	NA	cerema_0060	NA	atlantic	Europe	France	1400	metamorphic	FALSE	FALSE	FALSE	FALSE	NA	NA	NA	26.6	57	26.6	123	strong	0.001	NA	NA	0.001	0.001	0.001	1952-01-01	2011-01-01	57	57	aerial photography (transect) averaged	1.851	3.907	1.023	8.459	11.626	1.826	28.4377	4.25	9.595	4.215	860	13.6	10.8583	10
Evolution du trait de côte (histogrammes)	2016-01-29	MEEM	NA	Meem	NA	cerema_0061	NA	atlantic	Europe	France	200	undifferentiated recent marine deposits	FALSE	FALSE	FALSE	FALSE	NA	NA	NA	20.1	40	20.1	127	weak	0.001	NA	NA	0.001	0.001	0.001	1952-01-01	2011-01-01	57	57	aerial photography (transect) averaged	1.851	3.907	1.023	8.459	11.626	1.826	28.4377	4.25	9.595	4.215	860	13.6	10.8583	10
Evolution du trait de côte (histogrammes)	2016-01-29	MEEM	NA	Meem	NA	cerema_0062	NA	atlantic	Europe	France	200	metamorphic	FALSE	FALSE	FALSE	FALSE	NA	NA	NA	14.2	29	14.2	179	strong	0.001	NA	NA	0.001	0.001	0.001	1952-01-01	2011-01-01	57	57	aerial photography (transect) averaged	1.851	3.907	1.023	8.459	11.626	1.826	28.4377	4.25	9.595	4.215	860	13.6	10.8583	10
Evolution du trait de côte (histogrammes)	2016-01-29	MEEM	NA	Meem	NA	cerema_0063	NA	atlantic	Europe	France	200	loess and silts	FALSE	FALSE	FALSE	FALSE	NA	NA	NA	14.9	34	14.9	180	weak	0.001	NA	NA	0.001	0.001	0.001	1952-01-01	2011-01-01	57	57	aerial photography (transect) averaged	1.851	3.907	1.023	8.459	11.626	1.826	28.4377	4.25	9.595	4.215	860	13.6	10.8583	10
Evolution du trait de côte (histogrammes)	2016-01-29	MEEM	NA	Meem	NA	cerema_0064	NA	atlantic	Europe	France	3600	metamorphic	FALSE	FALSE	FALSE	FALSE	NA	NA	NA	21.4	56	21.4	150	strong	0.008	NA	NA	0.001	0.127	0.008	1952-01-01	2011-01-01	57	57	aerial photography (transect) averaged	1.851	3.907	1.023	8.459	11.626	1.826	28.4377	4.25	9.595	4.215	860	13.6	10.8583	10
Evolution du trait de côte (histogrammes)	2016-01-29	MEEM	NA	Meem	NA	cerema_0065	NA	atlantic	Europe	France	600	metamorphic	FALSE	FALSE	FALSE	FALSE	NA	NA	NA	10.6	31	10.6	179	strong	0.001	NA	NA	0.001	0.001	0.001	1952-01-01	2011-01-01	57	57	aerial photography (transect) averaged	1.851	3.907	1.023	8.459	11.626	1.826	28.4377	4.25	9.595	4.215	860	13.6	10.8583	10
Evolution du trait de côte (histogrammes)	2016-01-29	MEEM	NA	Meem	NA	cerema_0066	NA	atlantic	Europe	France	2200	metamorphic	FALSE	FALSE	FALSE	FALSE	NA	NA	NA	25	52	25	223	strong	0.001	NA	NA	0.001	0.001	0.001	1952-01-01	2011-01-01	57	57	aerial photography (transect) averaged	1.851	3.907	1.023	8.459	11.626	1.826	28.4377	4.25	9.595	4.215	860	13.6	10.8583	10
Evolution du trait de côte (histogrammes)	2016-01-29	MEEM	NA	Meem	NA	cerema_0067	NA	atlantic	Europe	France	1600	metamorphic	FALSE	FALSE	FALSE	FALSE	NA	NA	NA	30	60	30	228	strong	0.001	NA	NA	0.001	0.001	0.001	1952-01-01	2011-01-01	57	57	aerial photography (transect) averaged	1.851	3.907	1.023	8.459	11.626	1.826	28.4377	4.25	9.595	4.215	860	13.6	10.8583	10
Evolution du trait de côte (histogrammes)	2016-01-29	MEEM	NA	Meem	NA	cerema_0068	mediterranean	NA	Europe	France	200	limestone	FALSE	FALSE	FALSE	FALSE	NA	NA	NA	21.2	47	21.2	37	strong	0.001	NA	NA	0.001	0.001	0.001	1952-01-01	2011-01-01	84.21	84.21	aerial photography (transect) averaged	1.067	2.823	0.846	4.824	7.032	1.266	5.38888	2.25	19.35	0.175	556	15.2	14.2583	15.5
Evolution du trait de côte (histogrammes)	2016-01-29	MEEM	NA	Meem	NA	cerema_0069	NA	atlantic	Europe	France	21200	plutonic	FALSE	FALSE	FALSE	FALSE	NA	NA	NA	45.5	85	45.5	260	strong	0.001	NA	NA	0.001	0.001	0.001	1952-01-01	2011-01-01	57	57	aerial photography (transect) averaged	1.851	3.907	1.023	8.459	11.626	1.826	28.4377	4.25	9.595	4.09	864	14.6	11.4833	9.7
Evolution du trait de côte (histogrammes)	2016-01-29	MEEM	NA	Meem	NA	cerema_0070	NA	atlantic	Europe	France	400	schist	FALSE	FALSE	FALSE	FALSE	NA	NA	NA	31.8	70	31.8	281	strong	0.001	NA	NA	0.001	0.001	0.001	1952-01-01	2011-01-01	57	57	aerial photography (transect) averaged	1.851	3.907	1.023	8.459	11.626	1.826	28.4377	4.25	9.595	3.242	864	14.6	11.4833	9.7
Evolution du trait de côte (histogrammes)	2016-01-29	MEEM	NA	Meem	NA	cerema_0071	NA	atlantic	Europe	France	400	schist	FALSE	FALSE	FALSE	FALSE	NA	NA	NA	37.6	63	37.6	185	strong	0.001	NA	NA	0.001	0.001	0.001	1952-01-01	2011-01-01	57	57	aerial photography (transect) averaged	1.851	3.907	1.023	8.459	11.626	1.826	28.4377	4.25	9.595	4.018	864	14.6	11.4833	9.7
Evolution du trait de côte (histogrammes)	2016-01-29	MEEM	NA	Meem	NA	cerema_0072	NA	atlantic	Europe	France	6800	metamorphic	FALSE	FALSE	FALSE	FALSE	NA	NA	NA	43.5	77	43.5	250	strong	0.001	NA	NA	0.001	0.001	0.001	1952-01-01	2011-01-01	57	57	aerial photography (transect) averaged	1.851	3.907	1.023	8.459	11.626	1.826	28.4377	4.25	9.595	3.529	864	14.6	11.4833	9.7
Evolution du trait de côte (histogrammes)	2016-01-29	MEEM	NA	Meem	NA	cerema_0073	NA	atlantic	Europe	France	600	metamorphic	FALSE	FALSE	FALSE	FALSE	NA	NA	NA	47.3	76	47.3	190	strong	0.0166667	NA	NA	0.001	0.048	0.0166667	1952-01-01	2011-01-01	57	57	aerial photography (transect) averaged	1.851	3.907	1.023	8.459	11.626	1.826	28.4377	4.25	9.595	3.529	864	14.6	11.4833	9.7
Evolution du trait de côte (histogrammes)	2016-01-29	MEEM	NA	Meem	NA	cerema_0074	NA	atlantic	Europe	France	600	metamorphic	FALSE	FALSE	FALSE	FALSE	NA	NA	NA	27.9	54	27.9	154	strong	0.0166667	NA	NA	0.001	0.048	0.0166667	1952-01-01	2011-01-01	57	57	aerial photography (transect) averaged	1.851	3.907	1.023	8.459	11.626	1.826	28.4377	4.25	9.595	3.529	864	14.6	11.4833	9.7
Evolution du trait de côte (histogrammes)	2016-01-29	MEEM	NA	Meem	NA	cerema_0075	NA	atlantic	Europe	France	400	granite	FALSE	FALSE	FALSE	FALSE	NA	NA	NA	25	25	25	82	strong	0.001	NA	NA	0.001	0.001	0.001	1952-01-01	2011-01-01	59	59	aerial photography (transect) averaged	1.851	3.907	1.023	8.459	11.626	1.826	28.4377	4.25	9.595	3.242	864	14.6	11.4833	9.7
Evolution du trait de côte (histogrammes)	2016-01-29	MEEM	NA	Meem	NA	cerema_0076	NA	atlantic	Europe	France	12600	granite	FALSE	FALSE	FALSE	FALSE	NA	NA	NA	17.5	48	17.5	64	strong	0.00142857	NA	NA	0.001	0.026	0.00142857	1952-01-01	2011-01-01	58.1746	58.1746	aerial photography (transect) averaged	1.851	3.907	1.023	8.459	11.626	1.826	28.4377	4.25	9.595	3.242	864	14.6	11.4833	9.7
Evolution du trait de côte (histogrammes)	2016-01-29	MEEM	NA	Meem	NA	cerema_0077	NA	atlantic	Europe	France	12600	granite	FALSE	FALSE	FALSE	FALSE	NA	NA	NA	35.4	76	35.4	100	strong	0.00142857	NA	NA	0.001	0.026	0.00142857	1952-01-01	2011-01-01	58.1746	58.1746	aerial photography (transect) averaged	1.851	3.907	1.023	8.459	11.626	1.826	28.4377	4.25	9.595	3.242	864	14.6	11.4833	9.7
Evolution du trait de côte (histogrammes)	2016-01-29	MEEM	NA	Meem	NA	cerema_0078	NA	atlantic	Europe	France	200	undifferentiated recent marine deposits	FALSE	FALSE	FALSE	FALSE	NA	NA	NA	7.4	14	7.4	119	weak	0.001	NA	NA	0.001	0.001	0.001	1952-01-01	2011-01-01	59	59	aerial photography (transect) averaged	1.851	3.907	1.023	8.459	11.626	1.826	28.4377	4.25	9.595	3.242	864	14.6	11.4833	9.7
Evolution du trait de côte (histogrammes)	2016-01-29	MEEM	NA	Meem	NA	cerema_0079	NA	atlantic	Europe	France	200	granite	FALSE	FALSE	FALSE	FALSE	NA	NA	NA	3	5	3	66	strong	0.024	NA	NA	0.024	0.024	0.024	1952-01-01	2011-01-01	59	59	aerial photography (transect) averaged	1.851	3.907	1.023	8.459	11.626	1.826	28.4377	4.25	9.595	3.164	821	14.2	11.675	10
Evolution du trait de côte (histogrammes)	2016-01-29	MEEM	NA	Meem	NA	cerema_0080	NA	atlantic	Europe	France	1200	granite	FALSE	FALSE	FALSE	FALSE	NA	NA	NA	4.6	12	4.6	255	strong	0.001	NA	NA	0.001	0.001	0.001	1952-01-01	2011-01-01	59	59	aerial photography (transect) averaged	1.835	3.876	1.016	8.452	11.616	1.825	27.925	4.25	9.622	3.131	765	11.2	11.7	10.4
Evolution du trait de côte (histogrammes)	2016-01-29	MEEM	NA	Meem	NA	cerema_0081	NA	atlantic	Europe	France	200	aeolianite	FALSE	FALSE	FALSE	FALSE	NA	NA	NA	4	6	4	119	weak	0.001	NA	NA	0.001	0.001	0.001	1952-01-01	2011-01-01	59	59	aerial photography (transect) averaged	1.835	3.876	1.016	8.452	11.616	1.825	27.925	4.25	9.622	3.131	765	11.2	11.7	10.4
Evolution du trait de côte (histogrammes)	2016-01-29	MEEM	NA	Meem	NA	cerema_0082	NA	atlantic	Europe	France	200	aeolianite	FALSE	FALSE	FALSE	FALSE	NA	NA	NA	3	6	3	26	weak	0.001	NA	NA	0.001	0.001	0.001	1952-01-01	2011-01-01	59	59	aerial photography (transect) averaged	1.835	3.876	1.016	8.452	11.616	1.825	27.925	4.25	9.622	3.131	765	11.2	11.7	10.4
Evolution du trait de côte (histogrammes)	2016-01-29	MEEM	NA	Meem	NA	cerema_0083	NA	atlantic	Europe	France	600	metamorphic	FALSE	FALSE	FALSE	FALSE	NA	NA	NA	3.1	7	3.1	122	strong	0.00266667	NA	NA	0.001	0.006	0.00266667	1952-01-01	2011-01-01	59	59	aerial photography (transect) averaged	1.811	3.873	1.037	8.162	11.545	1.923	26.2661	4	9.969	3.724	690	18.3	11.4917	11.7
Evolution du trait de côte (histogrammes)	2016-01-29	MEEM	NA	Meem	NA	cerema_0084	NA	atlantic	Europe	France	800	metamorphic	FALSE	FALSE	FALSE	FALSE	NA	NA	NA	3.5	14	3.5	122	strong	0.001	NA	NA	0.001	0.001	0.001	1952-01-01	2011-01-01	59	59	aerial photography (transect) averaged	1.811	3.873	1.037	8.162	11.545	1.923	26.2661	4	9.969	3.724	690	18.3	11.4917	11.7
Evolution du trait de côte (histogrammes)	2016-01-29	MEEM	NA	Meem	NA	cerema_0085	mediterranean	NA	Europe	France	2800	limestone	FALSE	FALSE	FALSE	FALSE	NA	NA	NA	44.1	129	44.1	170	strong	0.001	NA	NA	0.001	0.001	0.001	1952-01-01	2011-01-01	84.21	84.21	aerial photography (transect) averaged	1.054	2.707	0.803	4.882	7.108	1.271	5.32159	2.25	18.709	0.174	556	15.2	14.2583	15.5
Evolution du trait de côte (histogrammes)	2016-01-29	MEEM	NA	Meem	NA	cerema_0086	NA	atlantic	Europe	France	200	undifferentiated recent marine deposits	FALSE	FALSE	FALSE	FALSE	NA	NA	NA	1	1	1	132	weak	0.081	NA	NA	0.081	0.081	0.081	1952-01-01	2011-01-01	59	59	aerial photography (transect) averaged	1.811	3.873	1.037	8.162	11.545	1.923	26.2661	4	9.969	3.724	690	18.3	11.4917	11.7
Evolution du trait de côte (histogrammes)	2016-01-29	MEEM	NA	Meem	NA	cerema_0087	NA	atlantic	Europe	France	600	metamorphic	FALSE	FALSE	FALSE	FALSE	NA	NA	NA	3.2	7	3.2	198	strong	0.036	NA	NA	0.001	0.057	0.036	1952-01-01	2011-01-01	59	59	aerial photography (transect) averaged	1.811	3.873	1.037	8.162	11.545	1.923	26.2661	4	9.969	3.724	690	18.3	11.4917	11.7
Evolution du trait de côte (histogrammes)	2016-01-29	MEEM	NA	Meem	NA	cerema_0088	NA	atlantic	Europe	France	600	undifferentiated recent marine deposits	FALSE	FALSE	FALSE	FALSE	NA	NA	NA	3.6	8	3.6	192	weak	0.001	NA	NA	0.001	0.001	0.001	1952-01-01	2011-01-01	59	59	aerial photography (transect) averaged	1.811	3.873	1.037	8.162	11.545	1.923	26.2661	4	9.969	3.724	690	18.3	11.4917	11.7
Evolution du trait de côte (histogrammes)	2016-01-29	MEEM	NA	Meem	NA	cerema_0089	NA	atlantic	Europe	France	800	undifferentiated recent marine deposits	FALSE	FALSE	FALSE	FALSE	NA	NA	NA	4.8	18	4.8	165	weak	0.001	NA	NA	0.001	0.001	0.001	1952-01-01	2011-01-01	59	59	aerial photography (transect) averaged	1.811	3.873	1.037	8.162	11.545	1.923	26.2661	4	9.969	3.724	690	18.3	11.4917	11.7
Evolution du trait de côte (histogrammes)	2016-01-29	MEEM	NA	Meem	NA	cerema_0090	NA	atlantic	Europe	France	200	granite	FALSE	FALSE	FALSE	FALSE	NA	NA	NA	5	10	5	239	strong	0.001	NA	NA	0.001	0.001	0.001	1952-01-01	2011-01-01	59	59	aerial photography (transect) averaged	1.811	3.873	1.037	8.162	11.545	1.923	26.2661	4	9.969	3.724	690	18.3	11.4917	11.7
Evolution du trait de côte (histogrammes)	2016-01-29	MEEM	NA	Meem	NA	cerema_0091	NA	atlantic	Europe	France	200	undifferentiated recent marine deposits	FALSE	FALSE	FALSE	FALSE	NA	NA	NA	10.4	17	10.4	235	weak	0.016	NA	NA	0.016	0.016	0.016	1952-01-01	2011-01-01	59	59	aerial photography (transect) averaged	1.811	3.873	1.037	8.162	11.545	1.923	26.2661	4	9.969	3.724	690	18.3	11.4917	11.7
Evolution du trait de côte (histogrammes)	2016-01-29	MEEM	NA	Meem	NA	cerema_0092	NA	atlantic	Europe	France	600	granite	FALSE	FALSE	FALSE	FALSE	NA	NA	NA	15.4	24	15.4	258	strong	0.001	NA	NA	0.001	0.001	0.001	1952-01-01	2011-01-01	59	59	aerial photography (transect) averaged	1.811	3.873	1.037	8.162	11.545	1.923	26.2661	4	9.969	3.586	690	18.3	11.4917	11.7
Evolution du trait de côte (histogrammes)	2016-01-29	MEEM	NA	Meem	NA	cerema_0093	NA	atlantic	Europe	France	200	undifferentiated recent marine deposits	FALSE	FALSE	FALSE	FALSE	NA	NA	NA	9.5	23	9.5	292	weak	0.001	NA	NA	0.001	0.001	0.001	1952-01-01	2011-01-01	59	59	aerial photography (transect) averaged	1.811	3.873	1.037	8.162	11.545	1.923	26.2661	4	9.969	3.586	690	18.3	11.4917	11.7
Evolution du trait de côte (histogrammes)	2016-01-29	MEEM	NA	Meem	NA	cerema_0094	NA	atlantic	Europe	France	800	gneiss	FALSE	FALSE	FALSE	FALSE	NA	NA	NA	2.5	5	2.5	282	strong	0.007	NA	NA	0.001	0.025	0.007	1952-01-01	2011-01-01	59	59	aerial photography (transect) averaged	1.811	3.873	1.037	8.162	11.545	1.923	26.2661	4	9.969	3.586	690	18.3	11.4917	11.7
Evolution du trait de côte (histogrammes)	2016-01-29	MEEM	NA	Meem	NA	cerema_0095	NA	atlantic	Europe	France	200	aeolianite	FALSE	FALSE	FALSE	FALSE	NA	NA	NA	9.7	27	9.7	278	weak	0.001	NA	NA	0.001	0.001	0.001	1952-01-01	2011-01-01	61	61	aerial photography (transect) averaged	1.591	3.325	0.881	7.349	10.564	1.737	18.2528	3.25	12.722	7.739	581	28.8	11.4833	12.1
Evolution du trait de côte (histogrammes)	2016-01-29	MEEM	NA	Meem	NA	cerema_0096	NA	atlantic	Europe	France	200	aeolianite	FALSE	FALSE	FALSE	FALSE	NA	NA	NA	12.1	21	12.1	253	weak	0.001	NA	NA	0.001	0.001	0.001	1952-01-01	2011-01-01	61	61	aerial photography (transect) averaged	1.591	3.325	0.881	7.349	10.564	1.737	18.2528	3.25	12.722	7.739	581	28.8	11.4833	12.1
Evolution du trait de côte (histogrammes)	2016-01-29	MEEM	NA	Meem	NA	cerema_0097	mediterranean	NA	Europe	France	1600	limestone	FALSE	FALSE	FALSE	FALSE	NA	NA	NA	31.4	78	31.4	128	strong	0.001	NA	NA	0.001	0.001	0.001	1952-01-01	2011-01-01	84.21	84.21	aerial photography (transect) averaged	1.054	2.707	0.803	4.882	7.108	1.271	5.32159	2.25	18.709	0.174	556	15.2	14.2583	15.5
Evolution du trait de côte (histogrammes)	2016-01-29	MEEM	NA	Meem	NA	cerema_0098	NA	atlantic	Europe	France	200	metamorphic	FALSE	FALSE	FALSE	FALSE	NA	NA	NA	16	26	16	264	strong	0.001	NA	NA	0.001	0.001	0.001	1952-01-01	2011-01-01	61	61	aerial photography (transect) averaged	1.591	3.325	0.881	7.349	10.564	1.737	18.2528	3.25	12.722	7.739	581	28.8	11.4833	12.1
Evolution du trait de côte (histogrammes)	2016-01-29	MEEM	NA	Meem	NA	cerema_0099	NA	atlantic	Europe	France	2400	metamorphic	FALSE	FALSE	FALSE	FALSE	NA	NA	NA	10.4	19	10.4	235	strong	0.00191667	NA	NA	0.001	0.012	0.00191667	1952-01-01	2011-01-01	61	61	aerial photography (transect) averaged	1.591	3.325	0.881	7.349	10.564	1.737	18.2528	3.25	12.722	7.739	581	28.8	11.4833	12.1
Evolution du trait de côte (histogrammes)	2016-01-29	MEEM	NA	Meem	NA	cerema_0100	NA	atlantic	Europe	France	200	metamorphic	FALSE	FALSE	FALSE	FALSE	NA	NA	NA	14.5	24	14.5	226	strong	0.001	NA	NA	0.001	0.001	0.001	1952-01-01	2011-01-01	61	61	aerial photography (transect) averaged	1.591	3.325	0.881	7.349	10.564	1.737	18.2528	3.25	12.722	7.739	581	28.8	11.4833	12.1
Evolution du trait de côte (histogrammes)	2016-01-29	MEEM	NA	Meem	NA	cerema_0101	NA	atlantic	Europe	France	800	metamorphic	FALSE	FALSE	FALSE	FALSE	NA	NA	NA	19	37	19	135	strong	0.001	NA	NA	0.001	0.001	0.001	1952-01-01	2011-01-01	61	61	aerial photography (transect) averaged	1.591	3.325	0.881	7.349	10.564	1.737	18.2528	3.25	12.722	7.643	762	27.2	11.0333	11.6
Evolution du trait de côte (histogrammes)	2016-01-29	MEEM	NA	Meem	NA	cerema_0102	NA	atlantic	Europe	France	600	metamorphic	FALSE	FALSE	FALSE	FALSE	NA	NA	NA	22.5	50	22.5	222	strong	0.001	NA	NA	0.001	0.001	0.001	1952-01-01	2011-01-01	61	61	aerial photography (transect) averaged	1.591	3.325	0.881	7.349	10.564	1.737	18.2528	3.25	12.722	7.643	762	27.2	11.0333	11.6
Evolution du trait de côte (histogrammes)	2016-01-29	MEEM	NA	Meem	NA	cerema_0103	mediterranean	NA	Europe	France	600	limestone	FALSE	FALSE	FALSE	FALSE	NA	NA	NA	21.9	43	21.9	196	strong	0.001	NA	NA	0.001	0.001	0.001	1952-01-01	2011-01-01	84.21	84.21	aerial photography (transect) averaged	1.054	2.707	0.803	4.882	7.108	1.271	5.32159	2.25	18.709	0.174	556	15.2	14.2583	15.5
Evolution du trait de côte (histogrammes)	2016-01-29	MEEM	NA	Meem	NA	cerema_0104	mediterranean	NA	Europe	France	600	limestone	FALSE	FALSE	FALSE	FALSE	NA	NA	NA	12.6	24	12.6	240	strong	0.001	NA	NA	0.001	0.001	0.001	1952-01-01	2011-01-01	84.21	84.21	aerial photography (transect) averaged	1.054	2.707	0.803	4.882	7.108	1.271	5.32159	2.25	18.709	0.174	556	15.2	14.2583	15.5
Evolution du trait de côte (histogrammes)	2016-01-29	MEEM	NA	Meem	NA	cerema_0105	NA	atlantic	Europe	France	200	granite	FALSE	FALSE	FALSE	FALSE	NA	NA	NA	10.2	19	10.2	227	strong	0.001	NA	NA	0.001	0.001	0.001	1952-01-01	2011-01-01	59	59	aerial photography (transect) averaged	1.811	3.873	1.037	8.162	11.545	1.923	26.2661	4	9.969	3.243	730	14.4	11.5833	11
Evolution du trait de côte (histogrammes)	2016-01-29	MEEM	NA	Meem	NA	cerema_0106	NA	atlantic	Europe	France	600	metamorphic	FALSE	FALSE	FALSE	FALSE	NA	NA	NA	10.2	19	10.2	286	strong	0.001	NA	NA	0.001	0.001	0.001	1952-01-01	2011-01-01	59	59	aerial photography (transect) averaged	1.811	3.873	1.037	8.162	11.545	1.923	26.2661	4	9.969	3.586	690	18.3	11.4917	11.7
Evolution du trait de côte (histogrammes)	2016-01-29	MEEM	NA	Meem	NA	cerema_0107	NA	atlantic	Europe	France	1000	metamorphic	FALSE	FALSE	FALSE	FALSE	NA	NA	NA	2	4	2	100	strong	0.001	NA	NA	0.001	0.001	0.001	1952-01-01	2011-01-01	59	59	aerial photography (transect) averaged	1.811	3.873	1.037	8.162	11.545	1.923	26.2661	4	9.969	3.586	690	18.3	11.4917	11.7
Evolution du trait de côte (histogrammes)	2016-01-29	MEEM	NA	Meem	NA	cerema_0108	NA	atlantic	Europe	France	800	undifferentiated recent marine deposits	FALSE	FALSE	FALSE	FALSE	NA	NA	NA	9.4	16	9.4	350	weak	0.001	NA	NA	0.001	0.001	0.001	1952-01-01	2011-01-01	59	59	aerial photography (transect) averaged	1.811	3.873	1.037	8.162	11.545	1.923	26.2661	4	9.969	3.243	730	14.4	11.5833	11
Evolution du trait de côte (histogrammes)	2016-01-29	MEEM	NA	Meem	NA	cerema_0109	NA	atlantic	Europe	France	800	granite	FALSE	FALSE	FALSE	FALSE	NA	NA	NA	5.7	14	5.7	45	strong	0.001	NA	NA	0.001	0.001	0.001	1952-01-01	2011-01-01	59	59	aerial photography (transect) averaged	1.811	3.873	1.037	8.162	11.545	1.923	26.2661	4	9.969	3.586	690	18.3	11.4917	11.7
Evolution du trait de côte (histogrammes)	2016-01-29	MEEM	NA	Meem	NA	cerema_0110	NA	atlantic	Europe	France	400	granite	FALSE	FALSE	FALSE	FALSE	NA	NA	NA	4.4	7	4.4	131	strong	0.001	NA	NA	0.001	0.001	0.001	1952-01-01	2011-01-01	59	59	aerial photography (transect) averaged	1.811	3.873	1.037	8.162	11.545	1.923	26.2661	4	9.969	3.541	730	14.4	11.5833	11
Evolution du trait de côte (histogrammes)	2016-01-29	MEEM	NA	Meem	NA	cerema_0111	NA	atlantic	Europe	France	200	granite	FALSE	FALSE	FALSE	FALSE	NA	NA	NA	4	9	4	11	strong	0.001	NA	NA	0.001	0.001	0.001	1952-01-01	2011-01-01	59	59	aerial photography (transect) averaged	1.811	3.873	1.037	8.162	11.545	1.923	26.2661	4	9.969	3.541	730	14.4	11.5833	11
Evolution du trait de côte (histogrammes)	2016-01-29	MEEM	NA	Meem	NA	cerema_0112	mediterranean	NA	Europe	France	1400	limestone	FALSE	FALSE	FALSE	FALSE	NA	NA	NA	22	48	22	92	strong	0.001	NA	NA	0.001	0.001	0.001	1952-01-01	2011-01-01	84.21	84.21	aerial photography (transect) averaged	1.054	2.707	0.803	4.882	7.108	1.271	5.32159	2.25	18.709	0.174	556	15.2	14.2583	15.5
Evolution du trait de côte (histogrammes)	2016-01-29	MEEM	NA	Meem	NA	cerema_0113	NA	atlantic	Europe	France	600	granite	FALSE	FALSE	FALSE	FALSE	NA	NA	NA	4.4	9	4.4	121	strong	0.001	NA	NA	0.001	0.001	0.001	1952-01-01	2011-01-01	59	59	aerial photography (transect) averaged	1.811	3.873	1.037	8.162	11.545	1.923	26.2661	4	9.969	3.541	730	14.4	11.5833	11
Evolution du trait de côte (histogrammes)	2016-01-29	MEEM	NA	Meem	NA	cerema_0114	NA	atlantic	Europe	France	400	undifferentiated recent marine deposits	FALSE	FALSE	FALSE	FALSE	NA	NA	NA	5.7	13	5.7	65	weak	0.001	NA	NA	0.001	0.001	0.001	1952-01-01	2011-01-01	59	59	aerial photography (transect) averaged	1.811	3.873	1.037	8.162	11.545	1.923	26.2661	4	9.969	3.541	690	18.3	11.4917	11.7
Evolution du trait de côte (histogrammes)	2016-01-29	MEEM	NA	Meem	NA	cerema_0115	NA	atlantic	Europe	France	200	granite	FALSE	FALSE	FALSE	FALSE	NA	NA	NA	1.8	2	1.8	160	strong	0.001	NA	NA	0.001	0.001	0.001	1952-01-01	2011-01-01	59	59	aerial photography (transect) averaged	1.811	3.873	1.037	8.162	11.545	1.923	26.2661	4	9.969	3.541	690	18.3	11.4917	11.7
Evolution du trait de côte (histogrammes)	2016-01-29	MEEM	NA	Meem	NA	cerema_0116	NA	atlantic	Europe	France	400	granite	FALSE	FALSE	FALSE	FALSE	NA	NA	NA	3.9	6	3.9	149	strong	0.001	NA	NA	0.001	0.001	0.001	1952-01-01	2011-01-01	59	59	aerial photography (transect) averaged	1.811	3.873	1.037	8.162	11.545	1.923	26.2661	4	9.969	3.541	690	18.3	11.4917	11.7
Evolution du trait de côte (histogrammes)	2016-01-29	MEEM	NA	Meem	NA	cerema_0117	NA	atlantic	Europe	France	600	granite	FALSE	FALSE	FALSE	FALSE	NA	NA	NA	3.2	5	3.2	61	strong	0.0336667	NA	NA	0.001	0.098	0.0336667	1952-01-01	2011-01-01	59	59	aerial photography (transect) averaged	1.811	3.873	1.037	8.162	11.545	1.923	26.2661	4	9.969	3.541	690	18.3	11.4917	11.7
Evolution du trait de côte (histogrammes)	2016-01-29	MEEM	NA	Meem	NA	cerema_0118	mediterranean	NA	Europe	France	200	marl and consolidated clay	FALSE	FALSE	FALSE	FALSE	NA	NA	NA	14.4	22	14.4	104	medium	0.001	NA	NA	0.001	0.001	0.001	1952-01-01	2011-01-01	84.21	84.21	aerial photography (transect) averaged	1.054	2.707	0.803	4.882	7.108	1.271	5.32159	2.25	18.709	0.174	556	15.2	14.2583	15.5
Evolution du trait de côte (histogrammes)	2016-01-29	MEEM	NA	Meem	NA	cerema_0119	NA	atlantic	Europe	France	400	granite	FALSE	FALSE	FALSE	FALSE	NA	NA	NA	2.5	4	2.5	86	strong	0.001	NA	NA	0.001	0.001	0.001	1952-01-01	2011-01-01	59	59	aerial photography (transect) averaged	1.811	3.873	1.037	8.162	11.545	1.923	26.2661	4	9.969	3.541	690	18.3	11.4917	11.7
Evolution du trait de côte (histogrammes)	2016-01-29	MEEM	NA	Meem	NA	cerema_0120	NA	atlantic	Europe	France	400	granite	FALSE	FALSE	FALSE	FALSE	NA	NA	NA	3.5	8	3.5	166	strong	0.001	NA	NA	0.001	0.001	0.001	1952-01-01	2011-01-01	59	59	aerial photography (transect) averaged	1.811	3.873	1.037	8.162	11.545	1.923	26.2661	4	9.969	3.541	690	18.3	11.4917	11.7
Evolution du trait de côte (histogrammes)	2016-01-29	MEEM	NA	Meem	NA	cerema_0121	NA	atlantic	Europe	France	1000	granite	FALSE	FALSE	FALSE	FALSE	NA	NA	NA	3.7	8	3.7	90	strong	0.001	NA	NA	0.001	0.001	0.001	1952-01-01	2011-01-01	59	59	aerial photography (transect) averaged	1.811	3.873	1.037	8.162	11.545	1.923	26.2661	4	9.969	3.586	690	18.3	11.4917	11.7
Evolution du trait de côte (histogrammes)	2016-01-29	MEEM	NA	Meem	NA	cerema_0122	NA	atlantic	Europe	France	2400	granite	FALSE	FALSE	FALSE	FALSE	NA	NA	NA	6.2	15	6.2	360	strong	0.001	NA	NA	0.001	0.001	0.001	1952-01-01	2011-01-01	59	59	aerial photography (transect) averaged	1.811	3.873	1.037	8.162	11.545	1.923	26.2661	4	9.969	3.586	690	18.3	11.4917	11.7
Evolution du trait de côte (histogrammes)	2016-01-29	MEEM	NA	Meem	NA	cerema_0123	NA	atlantic	Europe	France	1800	granite	FALSE	FALSE	FALSE	FALSE	NA	NA	NA	5.6	12	5.6	360	strong	0.001	NA	NA	0.001	0.001	0.001	1952-01-01	2011-01-01	59	59	aerial photography (transect) averaged	1.811	3.873	1.037	8.162	11.545	1.923	26.2661	4	9.969	3.586	690	18.3	11.4917	11.7
Evolution du trait de côte (histogrammes)	2016-01-29	MEEM	NA	Meem	NA	cerema_0124	NA	atlantic	Europe	France	200	metamorphic	FALSE	FALSE	FALSE	FALSE	NA	NA	NA	2	3	2	131	strong	0.147	NA	NA	0.147	0.147	0.147	1952-01-01	2011-01-01	59	59	aerial photography (transect) averaged	1.811	3.873	1.037	8.162	11.545	1.923	26.2661	4	9.969	3.586	690	18.3	11.4917	11.7
Evolution du trait de côte (histogrammes)	2016-01-29	MEEM	NA	Meem	NA	cerema_0125	NA	atlantic	Europe	France	400	metamorphic	FALSE	FALSE	FALSE	FALSE	NA	NA	NA	4	4	4	35	strong	0.0285	NA	NA	0.001	0.056	0.0285	1952-01-01	2011-01-01	59	59	aerial photography (transect) averaged	1.811	3.873	1.037	8.162	11.545	1.923	26.2661	4	9.969	3.586	690	18.3	11.4917	11.7
Evolution du trait de côte (histogrammes)	2016-01-29	MEEM	NA	Meem	NA	cerema_0126	mediterranean	NA	Europe	France	200	metamorphic	FALSE	FALSE	FALSE	FALSE	NA	NA	NA	60.5	119	60.5	48	strong	0.023	NA	NA	0.023	0.023	0.023	1952-01-01	2011-01-01	84.21	84.21	aerial photography (transect) averaged	1.054	2.707	0.803	4.882	7.108	1.271	5.32159	2.25	18.709	0.168	556	15.2	14.2583	15.5
Evolution du trait de côte (histogrammes)	2016-01-29	MEEM	NA	Meem	NA	cerema_0127	NA	atlantic	Europe	France	200	undifferentiated recent marine deposits	FALSE	FALSE	FALSE	FALSE	NA	NA	NA	1.3	2	1.3	275	weak	0.001	NA	NA	0.001	0.001	0.001	1952-01-01	2011-01-01	59	59	aerial photography (transect) averaged	1.811	3.873	1.037	8.162	11.545	1.923	26.2661	4	9.969	3.724	690	18.3	11.4917	11.7
Evolution du trait de côte (histogrammes)	2016-01-29	MEEM	NA	Meem	NA	cerema_0128	NA	atlantic	Europe	France	1800	granite	FALSE	FALSE	FALSE	FALSE	NA	NA	NA	2.8	4	2.8	314	strong	0.00622222	NA	NA	0.001	0.048	0.00622222	1952-01-01	2011-01-01	59	59	aerial photography (transect) averaged	1.811	3.873	1.037	8.162	11.545	1.923	26.2661	4	9.969	3.724	690	18.3	11.4917	11.7
Evolution du trait de côte (histogrammes)	2016-01-29	MEEM	NA	Meem	NA	cerema_0129	NA	atlantic	Europe	France	1800	granite	FALSE	FALSE	FALSE	FALSE	NA	NA	NA	3.4	10	3.4	31	strong	0.00622222	NA	NA	0.001	0.048	0.00622222	1952-01-01	2011-01-01	59	59	aerial photography (transect) averaged	1.811	3.873	1.037	8.162	11.545	1.923	26.2661	4	9.969	3.724	690	18.3	11.4917	11.7
Evolution du trait de côte (histogrammes)	2016-01-29	MEEM	NA	Meem	NA	cerema_0130	NA	atlantic	Europe	France	1000	granite	FALSE	FALSE	FALSE	FALSE	NA	NA	NA	3.2	5	3.2	360	strong	0.001	NA	NA	0.001	0.001	0.001	1952-01-01	2011-01-01	59	59	aerial photography (transect) averaged	1.811	3.873	1.037	8.162	11.545	1.923	26.2661	4	9.969	3.724	690	18.3	11.4917	11.7
Evolution du trait de côte (histogrammes)	2016-01-29	MEEM	NA	Meem	NA	cerema_0131	NA	atlantic	Europe	France	600	granite	FALSE	FALSE	FALSE	FALSE	NA	NA	NA	1.3	2	1.3	290	strong	0.0136667	NA	NA	0.001	0.039	0.0136667	1952-01-01	2011-01-01	59	59	aerial photography (transect) averaged	1.811	3.873	1.037	8.162	11.545	1.923	26.2661	4	9.969	3.586	690	18.3	11.4917	11.7
Evolution du trait de côte (histogrammes)	2016-01-29	MEEM	NA	Meem	NA	cerema_0132	NA	atlantic	Europe	France	600	granite	FALSE	FALSE	FALSE	FALSE	NA	NA	NA	1.3	2	1.3	176	strong	0.0223333	NA	NA	0.001	0.065	0.0223333	1952-01-01	2011-01-01	59	59	aerial photography (transect) averaged	1.811	3.873	1.037	8.162	11.545	1.923	26.2661	4	9.969	3.586	690	18.3	11.4917	11.7
Evolution du trait de côte (histogrammes)	2016-01-29	MEEM	NA	Meem	NA	cerema_0133	NA	atlantic	Europe	France	600	granite	FALSE	FALSE	FALSE	FALSE	NA	NA	NA	1	1	1	65	strong	0.0223333	NA	NA	0.001	0.065	0.0223333	1952-01-01	2011-01-01	59	59	aerial photography (transect) averaged	1.811	3.873	1.037	8.162	11.545	1.923	26.2661	4	9.969	3.586	690	18.3	11.4917	11.7
Evolution du trait de côte (histogrammes)	2016-01-29	MEEM	NA	Meem	NA	cerema_0134	NA	atlantic	Europe	France	200	undifferentiated recent marine deposits	FALSE	FALSE	FALSE	FALSE	NA	NA	NA	5.5	12	5.5	241	weak	0.001	NA	NA	0.001	0.001	0.001	1952-01-01	2011-01-01	59	59	aerial photography (transect) averaged	1.811	3.873	1.037	8.162	11.545	1.923	26.2661	4	9.969	3.586	690	18.3	11.4917	11.7
Evolution du trait de côte (histogrammes)	2016-01-29	MEEM	NA	Meem	NA	cerema_0135	NA	atlantic	Europe	France	200	granite	FALSE	FALSE	FALSE	FALSE	NA	NA	NA	4.4	12	4.4	194	strong	0.287	NA	NA	0.287	0.287	0.287	1952-01-01	2011-01-01	59	59	aerial photography (transect) averaged	1.811	3.873	1.037	8.162	11.545	1.923	26.2661	4	9.969	3.586	690	18.3	11.4917	11.7
Evolution du trait de côte (histogrammes)	2016-01-29	MEEM	NA	Meem	NA	cerema_0136	NA	atlantic	Europe	France	800	granite	FALSE	FALSE	FALSE	FALSE	NA	NA	NA	1.6	3	1.6	118	strong	0.0095	NA	NA	0.001	0.035	0.0095	1952-01-01	2011-01-01	59	59	aerial photography (transect) averaged	1.811	3.873	1.037	8.162	11.545	1.923	26.2661	4	9.969	3.586	690	18.3	11.4917	11.7
Evolution du trait de côte (histogrammes)	2016-01-29	MEEM	NA	Meem	NA	cerema_0137	NA	atlantic	Europe	France	200	gneiss	FALSE	FALSE	FALSE	FALSE	NA	NA	NA	4	4	4	36	strong	0.001	NA	NA	0.001	0.001	0.001	1952-01-01	2011-01-01	59	59	aerial photography (transect) averaged	1.811	3.873	1.037	8.162	11.545	1.923	26.2661	4	9.969	3.586	690	18.3	11.4917	11.7
Evolution du trait de côte (histogrammes)	2016-01-29	MEEM	NA	Meem	NA	cerema_0138	mediterranean	NA	Europe	France	800	metamorphic	FALSE	FALSE	FALSE	FALSE	NA	NA	NA	37.8	106	37.8	30	strong	0.02725	NA	NA	0.001	0.106	0.02725	1952-01-01	2011-01-01	84.21	84.21	aerial photography (transect) averaged	1.054	2.707	0.803	4.882	7.108	1.271	5.32159	2.25	18.709	0.168	556	15.2	14.2583	15.5
Evolution du trait de côte (histogrammes)	2016-01-29	MEEM	NA	Meem	NA	cerema_0139	NA	atlantic	Europe	France	1000	granite	FALSE	FALSE	FALSE	FALSE	NA	NA	NA	8.3	15	8.3	110	strong	0.001	NA	NA	0.001	0.001	0.001	1952-01-01	2011-01-01	59	59	aerial photography (transect) averaged	1.811	3.873	1.037	8.162	11.545	1.923	26.2661	4	9.969	3.541	754	15.7	11.9417	10.7
Evolution du trait de côte (histogrammes)	2016-01-29	MEEM	NA	Meem	NA	cerema_0140	NA	atlantic	Europe	France	200	undifferentiated recent marine deposits	FALSE	FALSE	FALSE	FALSE	NA	NA	NA	6.4	13	6.4	100	weak	0.082	NA	NA	0.082	0.082	0.082	1952-01-01	2011-01-01	59	59	aerial photography (transect) averaged	1.811	3.873	1.037	8.162	11.545	1.923	26.2661	4	9.969	3.541	754	15.7	11.9417	10.7
Evolution du trait de côte (histogrammes)	2016-01-29	MEEM	NA	Meem	NA	cerema_0141	NA	atlantic	Europe	France	200	aeolianite	FALSE	FALSE	FALSE	FALSE	NA	NA	NA	7	10	7	322	weak	0.001	NA	NA	0.001	0.001	0.001	1952-01-01	2011-01-01	59	59	aerial photography (transect) averaged	1.811	3.873	1.037	8.162	11.545	1.923	26.2661	4	9.969	3.541	754	15.7	11.9417	10.7
Evolution du trait de côte (histogrammes)	2016-01-29	MEEM	NA	Meem	NA	cerema_0142	NA	atlantic	Europe	France	200	granite	FALSE	FALSE	FALSE	FALSE	NA	NA	NA	7.8	14	7.8	337	strong	0.001	NA	NA	0.001	0.001	0.001	1952-01-01	2011-01-01	59	59	aerial photography (transect) averaged	1.811	3.873	1.037	8.162	11.545	1.923	26.2661	4	9.969	3.541	730	14.4	11.5833	11
Evolution du trait de côte (histogrammes)	2016-01-29	MEEM	NA	Meem	NA	cerema_0143	NA	atlantic	Europe	France	400	granite	FALSE	FALSE	FALSE	FALSE	NA	NA	NA	5	10	5	211	strong	0.001	NA	NA	0.001	0.001	0.001	1952-01-01	2011-01-01	59	59	aerial photography (transect) averaged	1.811	3.873	1.037	8.162	11.545	1.923	26.2661	4	9.969	3.586	690	18.3	11.4917	11.7
Evolution du trait de côte (histogrammes)	2016-01-29	MEEM	NA	Meem	NA	cerema_0144	NA	atlantic	Europe	France	200	granite	FALSE	FALSE	FALSE	FALSE	NA	NA	NA	5.4	9	5.4	81	strong	0.001	NA	NA	0.001	0.001	0.001	1952-01-01	2011-01-01	59	59	aerial photography (transect) averaged	1.811	3.873	1.037	8.162	11.545	1.923	26.2661	4	9.969	3.586	690	18.3	11.4917	11.7
Evolution du trait de côte (histogrammes)	2016-01-29	MEEM	NA	Meem	NA	cerema_0145	NA	atlantic	Europe	France	2400	granite	FALSE	FALSE	FALSE	FALSE	NA	NA	NA	5.3	14	5.3	2	strong	0.001	NA	NA	0.001	0.001	0.001	1952-01-01	2011-01-01	59	59	aerial photography (transect) averaged	1.811	3.873	1.037	8.162	11.545	1.923	26.2661	4	9.969	3.586	690	18.3	11.4917	11.7
Evolution du trait de côte (histogrammes)	2016-01-29	MEEM	NA	Meem	NA	cerema_0146	mediterranean	NA	Europe	France	200		FALSE	FALSE	FALSE	FALSE	NA	NA	NA	86	244	86	85	weak	0.117	NA	NA	0.117	0.117	0.117	1952-01-01	2011-01-01	87.21	87.21	aerial photography (transect) averaged	0.904	2.313	0.692	4.787	6.921	1.249	3.83851	2.25	19.163	0.19	701	27.1	12.8167	14.9
Evolution du trait de côte (histogrammes)	2016-01-29	MEEM	NA	Meem	NA	cerema_0147	NA	atlantic	Europe	France	600	gneiss	FALSE	FALSE	FALSE	FALSE	NA	NA	NA	4.9	11	4.9	197	strong	0.001	NA	NA	0.001	0.001	0.001	1952-01-01	2011-01-01	59	59	aerial photography (transect) averaged	1.811	3.873	1.037	8.162	11.545	1.923	26.2661	4	9.969	3.586	690	18.3	11.4917	11.7
Evolution du trait de côte (histogrammes)	2016-01-29	MEEM	NA	Meem	NA	cerema_0148	NA	atlantic	Europe	France	800	granite	FALSE	FALSE	FALSE	FALSE	NA	NA	NA	10.6	14	10.6	253	strong	0.001	NA	NA	0.001	0.001	0.001	1952-01-01	2011-01-01	59	59	aerial photography (transect) averaged	1.811	3.873	1.037	8.162	11.545	1.923	26.2661	4	9.969	3.586	690	18.3	11.4917	11.7
Evolution du trait de côte (histogrammes)	2016-01-29	MEEM	NA	Meem	NA	cerema_0149	NA	atlantic	Europe	France	800	granite	FALSE	FALSE	FALSE	FALSE	NA	NA	NA	3.3	9	3.3	238	strong	0.001	NA	NA	0.001	0.001	0.001	1952-01-01	2011-01-01	59	59	aerial photography (transect) averaged	1.811	3.873	1.037	8.162	11.545	1.923	26.2661	4	9.969	3.586	690	18.3	11.4917	11.7
Evolution du trait de côte (histogrammes)	2016-01-29	MEEM	NA	Meem	NA	cerema_0150	NA	atlantic	Europe	France	200	gneiss	FALSE	FALSE	FALSE	FALSE	NA	NA	NA	8	12	8	302	strong	0.001	NA	NA	0.001	0.001	0.001	1952-01-01	2011-01-01	59	59	aerial photography (transect) averaged	1.811	3.873	1.037	8.162	11.545	1.923	26.2661	4	9.969	3.586	690	18.3	11.4917	11.7
Evolution du trait de côte (histogrammes)	2016-01-29	MEEM	NA	Meem	NA	cerema_0151	NA	atlantic	Europe	France	400	gneiss	FALSE	FALSE	FALSE	FALSE	NA	NA	NA	4	6	4	209	strong	0.001	NA	NA	0.001	0.001	0.001	1952-01-01	2011-01-01	59	59	aerial photography (transect) averaged	1.811	3.873	1.037	8.162	11.545	1.923	26.2661	4	9.969	3.586	690	18.3	11.4917	11.7
Evolution du trait de côte (histogrammes)	2016-01-29	MEEM	NA	Meem	NA	cerema_0152	NA	atlantic	Europe	France	400	gneiss	FALSE	FALSE	FALSE	FALSE	NA	NA	NA	7.7	11	7.7	270	strong	0.001	NA	NA	0.001	0.001	0.001	1952-01-01	2011-01-01	59	59	aerial photography (transect) averaged	1.811	3.873	1.037	8.162	11.545	1.923	26.2661	4	9.969	3.586	690	18.3	11.4917	11.7
Evolution du trait de côte (histogrammes)	2016-01-29	MEEM	NA	Meem	NA	cerema_0153	NA	atlantic	Europe	France	600	gneiss	FALSE	FALSE	FALSE	FALSE	NA	NA	NA	8.6	15	8.6	2	strong	0.001	NA	NA	0.001	0.001	0.001	1952-01-01	2011-01-01	59	59	aerial photography (transect) averaged	1.811	3.873	1.037	8.162	11.545	1.923	26.2661	4	9.969	3.586	690	18.3	11.4917	11.7
Evolution du trait de côte (histogrammes)	2016-01-29	MEEM	NA	Meem	NA	cerema_0154	NA	atlantic	Europe	France	1400	gneiss	FALSE	FALSE	FALSE	FALSE	NA	NA	NA	7	13	7	289	strong	0.001	NA	NA	0.001	0.001	0.001	1952-01-01	2011-01-01	59	59	aerial photography (transect) averaged	1.811	3.873	1.037	8.162	11.545	1.923	26.2661	4	9.969	3.586	690	18.3	11.4917	11.7
Evolution du trait de côte (histogrammes)	2016-01-29	MEEM	NA	Meem	NA	cerema_0155	NA	atlantic	Europe	France	200	gneiss	FALSE	FALSE	FALSE	FALSE	NA	NA	NA	11.6	19	11.6	354	strong	0.001	NA	NA	0.001	0.001	0.001	1952-01-01	2011-01-01	59	59	aerial photography (transect) averaged	1.811	3.873	1.037	8.162	11.545	1.923	26.2661	4	9.969	3.586	690	18.3	11.4917	11.7
Evolution du trait de côte (histogrammes)	2016-01-29	MEEM	NA	Meem	NA	cerema_0156	mediterranean	NA	Europe	France	800	sedimentaires	FALSE	FALSE	FALSE	FALSE	NA	NA	NA	14.7	25	14.7	68	strong	0.02875	NA	NA	0.001	0.088	0.02875	1952-01-01	2011-01-01	84.21	84.21	aerial photography (transect) averaged	1.054	2.707	0.803	4.882	7.108	1.271	5.32159	2.25	18.709	0.168	556	15.2	14.2583	15.5
Evolution du trait de côte (histogrammes)	2016-01-29	MEEM	NA	Meem	NA	cerema_0157	NA	atlantic	Europe	France	400	gneiss	FALSE	FALSE	FALSE	FALSE	NA	NA	NA	8.4	17	8.4	313	strong	0.001	NA	NA	0.001	0.001	0.001	1952-01-01	2011-01-01	59	59	aerial photography (transect) averaged	1.811	3.873	1.037	8.162	11.545	1.923	26.2661	4	9.969	3.586	690	18.3	11.4917	11.7
Evolution du trait de côte (histogrammes)	2016-01-29	MEEM	NA	Meem	NA	cerema_0158	NA	atlantic	Europe	France	400	gneiss	FALSE	FALSE	FALSE	FALSE	NA	NA	NA	3.2	5	3.2	164	strong	0.001	NA	NA	0.001	0.001	0.001	1952-01-01	2011-01-01	59	59	aerial photography (transect) averaged	1.811	3.873	1.037	8.162	11.545	1.923	26.2661	4	9.969	3.586	690	18.3	11.4917	11.7
Evolution du trait de côte (histogrammes)	2016-01-29	MEEM	NA	Meem	NA	cerema_0159	NA	atlantic	Europe	France	400	granite	FALSE	FALSE	FALSE	FALSE	NA	NA	NA	4.3	6	4.3	244	strong	0.001	NA	NA	0.001	0.001	0.001	1952-01-01	2011-01-01	59	59	aerial photography (transect) averaged	1.811	3.873	1.037	8.162	11.545	1.923	26.2661	4	9.969	3.586	690	18.3	11.4917	11.7
Evolution du trait de côte (histogrammes)	2016-01-29	MEEM	NA	Meem	NA	cerema_0160	NA	atlantic	Europe	France	200	gneiss	FALSE	FALSE	FALSE	FALSE	NA	NA	NA	6.5	13	6.5	203	strong	0.001	NA	NA	0.001	0.001	0.001	1952-01-01	2011-01-01	59	59	aerial photography (transect) averaged	1.811	3.873	1.037	8.162	11.545	1.923	26.2661	4	9.969	3.586	690	18.3	11.4917	11.7
Evolution du trait de côte (histogrammes)	2016-01-29	MEEM	NA	Meem	NA	cerema_0161	NA	atlantic	Europe	France	1000	granite	FALSE	FALSE	FALSE	FALSE	NA	NA	NA	6.3	13	6.3	308	strong	0.001	NA	NA	0.001	0.001	0.001	1952-01-01	2011-01-01	59	59	aerial photography (transect) averaged	1.811	3.873	1.037	8.162	11.545	1.923	26.2661	4	9.969	3.586	690	18.3	11.4917	11.7
Evolution du trait de côte (histogrammes)	2016-01-29	MEEM	NA	Meem	NA	cerema_0162	NA	atlantic	Europe	France	200	gneiss	FALSE	FALSE	FALSE	FALSE	NA	NA	NA	11.1	14	11.1	243	strong	0.001	NA	NA	0.001	0.001	0.001	1952-01-01	2011-01-01	59	59	aerial photography (transect) averaged	1.811	3.873	1.037	8.162	11.545	1.923	26.2661	4	9.969	3.586	690	18.3	11.4917	11.7
Evolution du trait de côte (histogrammes)	2016-01-29	MEEM	NA	Meem	NA	cerema_0163	NA	atlantic	Europe	France	600	gneiss	FALSE	FALSE	FALSE	FALSE	NA	NA	NA	7.6	14	7.6	170	strong	0.001	NA	NA	0.001	0.001	0.001	1952-01-01	2011-01-01	59	59	aerial photography (transect) averaged	1.811	3.873	1.037	8.162	11.545	1.923	26.2661	4	9.969	3.586	690	18.3	11.4917	11.7
Evolution du trait de côte (histogrammes)	2016-01-29	MEEM	NA	Meem	NA	cerema_0164	NA	atlantic	Europe	France	600	gneiss	FALSE	FALSE	FALSE	FALSE	NA	NA	NA	6.5	14	6.5	271	strong	0.001	NA	NA	0.001	0.001	0.001	1952-01-01	2011-01-01	59	59	aerial photography (transect) averaged	1.811	3.873	1.037	8.162	11.545	1.923	26.2661	4	9.969	3.586	690	18.3	11.4917	11.7
Evolution du trait de côte (histogrammes)	2016-01-29	MEEM	NA	Meem	NA	cerema_0165	NA	atlantic	Europe	France	600	gneiss	FALSE	FALSE	FALSE	FALSE	NA	NA	NA	4.9	11	4.9	215	strong	0.035	NA	NA	0.001	0.103	0.035	1952-01-01	2011-01-01	59	59	aerial photography (transect) averaged	1.811	3.873	1.037	8.162	11.545	1.923	26.2661	4	9.969	3.586	690	18.3	11.4917	11.7
Evolution du trait de côte (histogrammes)	2016-01-29	MEEM	NA	Meem	NA	cerema_0166	NA	atlantic	Europe	France	200	gneiss	FALSE	FALSE	FALSE	FALSE	NA	NA	NA	10.7	18	10.7	142	strong	0.001	NA	NA	0.001	0.001	0.001	1952-01-01	2011-01-01	59	59	aerial photography (transect) averaged	1.811	3.873	1.037	8.162	11.545	1.923	26.2661	4	9.969	3.586	690	18.3	11.4917	11.7
Evolution du trait de côte (histogrammes)	2016-01-29	MEEM	NA	Meem	NA	cerema_0167	NA	atlantic	Europe	France	600	granite	FALSE	FALSE	FALSE	FALSE	NA	NA	NA	10.8	28	10.8	91	strong	0.001	NA	NA	0.001	0.001	0.001	1952-01-01	2011-01-01	59	59	aerial photography (transect) averaged	1.811	3.873	1.037	8.162	11.545	1.923	26.2661	4	9.969	3.586	690	18.3	11.4917	11.7
Evolution du trait de côte (histogrammes)	2016-01-29	MEEM	NA	Meem	NA	cerema_0168	NA	atlantic	Europe	France	600	granite	FALSE	FALSE	FALSE	FALSE	NA	NA	NA	9.6	14	9.6	102	strong	0.001	NA	NA	0.001	0.001	0.001	1952-01-01	2011-01-01	59	59	aerial photography (transect) averaged	1.811	3.873	1.037	8.162	11.545	1.923	26.2661	4	9.969	3.586	690	18.3	11.4917	11.7
Evolution du trait de côte (histogrammes)	2016-01-29	MEEM	NA	Meem	NA	cerema_0169	mediterranean	NA	Europe	France	200	fluvial deposits	FALSE	FALSE	FALSE	FALSE	NA	NA	NA	16.4	28	16.4	66	weak	0.001	NA	NA	0.001	0.001	0.001	1952-01-01	2011-01-01	84.21	84.21	aerial photography (transect) averaged	1.054	2.707	0.803	4.882	7.108	1.271	5.32159	2.25	18.709	0.168	556	15.2	14.2583	15.5
Evolution du trait de côte (histogrammes)	2016-01-29	MEEM	NA	Meem	NA	cerema_0170	NA	atlantic	Europe	France	200	gneiss	FALSE	FALSE	FALSE	FALSE	NA	NA	NA	11.8	28	11.8	236	strong	0.086	NA	NA	0.086	0.086	0.086	1952-01-01	2011-01-01	59	59	aerial photography (transect) averaged	1.811	3.873	1.037	8.162	11.545	1.923	26.2661	4	9.969	3.586	690	18.3	11.4917	11.7
Evolution du trait de côte (histogrammes)	2016-01-29	MEEM	NA	Meem	NA	cerema_0171	NA	atlantic	Europe	France	1200	granite	FALSE	FALSE	FALSE	FALSE	NA	NA	NA	10.7	26	10.7	94	strong	0.0225	NA	NA	0.001	0.12	0.0225	1952-01-01	2011-01-01	59	59	aerial photography (transect) averaged	1.811	3.873	1.037	8.162	11.545	1.923	26.2661	4	9.969	3.586	690	18.3	11.4917	11.7
Evolution du trait de côte (histogrammes)	2016-01-29	MEEM	NA	Meem	NA	cerema_0172	NA	atlantic	Europe	France	800	gneiss	FALSE	FALSE	FALSE	FALSE	NA	NA	NA	7.9	15	7.9	134	strong	0.012	NA	NA	0.001	0.042	0.012	1952-01-01	2011-01-01	59	59	aerial photography (transect) averaged	1.811	3.873	1.037	8.162	11.545	1.923	26.2661	4	9.969	3.586	690	18.3	11.4917	11.7
Evolution du trait de côte (histogrammes)	2016-01-29	MEEM	NA	Meem	NA	cerema_0173	NA	atlantic	Europe	France	2800	schist	FALSE	FALSE	FALSE	FALSE	NA	NA	NA	19.6	37	19.6	147	strong	0.001	NA	NA	0.001	0.001	0.001	1952-01-01	2011-01-01	59	59	aerial photography (transect) averaged	1.811	3.873	1.037	8.162	11.545	1.923	26.2661	4	9.969	3.586	690	18.3	11.4917	11.7
Evolution du trait de côte (histogrammes)	2016-01-29	MEEM	NA	Meem	NA	cerema_0174	NA	atlantic	Europe	France	800	schist	FALSE	FALSE	FALSE	FALSE	NA	NA	NA	16.4	28	16.4	103	strong	0.001	NA	NA	0.001	0.001	0.001	1952-01-01	2011-01-01	59	59	aerial photography (transect) averaged	1.811	3.873	1.037	8.162	11.545	1.923	26.2661	4	9.969	3.586	690	18.3	11.4917	11.7
Evolution du trait de côte (histogrammes)	2016-01-29	MEEM	NA	Meem	NA	cerema_0175	NA	atlantic	Europe	France	400	metamorphic	FALSE	FALSE	FALSE	FALSE	NA	NA	NA	1.7	3	1.7	92	strong	0.001	NA	NA	0.001	0.001	0.001	1952-01-01	2011-01-01	59	59	aerial photography (transect) averaged	1.811	3.873	1.037	8.162	11.545	1.923	26.2661	4	9.969	3.586	690	18.3	11.4917	11.7
Evolution du trait de côte (histogrammes)	2016-01-29	MEEM	NA	Meem	NA	cerema_0176	NA	atlantic	Europe	France	400	undifferentiated recent marine deposits	FALSE	FALSE	FALSE	FALSE	NA	NA	NA	4.3	12	4.3	305	weak	0.031	NA	NA	0.001	0.061	0.031	1952-01-01	2011-01-01	59	59	aerial photography (transect) averaged	1.811	3.873	1.037	8.162	11.545	1.923	26.2661	4	9.969	3.586	690	18.3	11.4917	11.7
Evolution du trait de côte (histogrammes)	2016-01-29	MEEM	NA	Meem	NA	cerema_0177	NA	atlantic	Europe	France	400	undifferentiated recent marine deposits	FALSE	FALSE	FALSE	FALSE	NA	NA	NA	4	6	4	6	weak	0.031	NA	NA	0.001	0.061	0.031	1952-01-01	2011-01-01	59	59	aerial photography (transect) averaged	1.811	3.873	1.037	8.162	11.545	1.923	26.2661	4	9.969	3.586	690	18.3	11.4917	11.7
Evolution du trait de côte (histogrammes)	2016-01-29	MEEM	NA	Meem	NA	cerema_0178	NA	atlantic	Europe	France	1200	metamorphic	FALSE	FALSE	FALSE	FALSE	NA	NA	NA	12.7	18	12.7	101	strong	0.001	NA	NA	0.001	0.001	0.001	1952-01-01	2011-01-01	59	59	aerial photography (transect) averaged	1.811	3.873	1.037	8.162	11.545	1.923	26.2661	4	9.969	3.586	690	18.3	11.4917	11.7
Evolution du trait de côte (histogrammes)	2016-01-29	MEEM	NA	Meem	NA	cerema_0179	NA	atlantic	Europe	France	1200	metamorphic	FALSE	FALSE	FALSE	FALSE	NA	NA	NA	8.6	13	8.6	118	strong	0.001	NA	NA	0.001	0.001	0.001	1952-01-01	2011-01-01	59	59	aerial photography (transect) averaged	1.811	3.873	1.037	8.162	11.545	1.923	26.2661	4	9.969	3.586	690	18.3	11.4917	11.7
Evolution du trait de côte (histogrammes)	2016-01-29	MEEM	NA	Meem	NA	cerema_0180	NA	atlantic	Europe	France	1200	metamorphic	FALSE	FALSE	FALSE	FALSE	NA	NA	NA	7.1	16	7.1	35	strong	0.001	NA	NA	0.001	0.001	0.001	1952-01-01	2011-01-01	59	59	aerial photography (transect) averaged	1.811	3.873	1.037	8.162	11.545	1.923	26.2661	4	9.969	3.586	690	18.3	11.4917	11.7
Evolution du trait de côte (histogrammes)	2016-01-29	MEEM	NA	Meem	NA	cerema_0181	NA	atlantic	Europe	France	600	metamorphic	FALSE	FALSE	FALSE	FALSE	NA	NA	NA	7.4	16	7.4	106	strong	0.001	NA	NA	0.001	0.001	0.001	1952-01-01	2011-01-01	59	59	aerial photography (transect) averaged	1.811	3.873	1.037	8.162	11.545	1.923	26.2661	4	9.969	3.586	690	18.3	11.4917	11.7
Evolution du trait de côte (histogrammes)	2016-01-29	MEEM	NA	Meem	NA	cerema_0182	NA	atlantic	Europe	France	600	metamorphic	FALSE	FALSE	FALSE	FALSE	NA	NA	NA	7.9	20	7.9	117	strong	0.001	NA	NA	0.001	0.001	0.001	1952-01-01	2011-01-01	59	59	aerial photography (transect) averaged	1.811	3.873	1.037	8.162	11.545	1.923	26.2661	4	9.969	3.586	690	18.3	11.4917	11.7
Evolution du trait de côte (histogrammes)	2016-01-29	MEEM	NA	Meem	NA	cerema_0183	NA	atlantic	Europe	France	1000	granite	FALSE	FALSE	FALSE	FALSE	NA	NA	NA	4.2	10	4.2	360	strong	0.001	NA	NA	0.001	0.001	0.001	1952-01-01	2011-01-01	59	59	aerial photography (transect) averaged	1.811	3.873	1.037	8.162	11.545	1.923	26.2661	4	9.969	3.586	690	18.3	11.4917	11.7
Evolution du trait de côte (histogrammes)	2016-01-29	MEEM	NA	Meem	NA	cerema_0184	mediterranean	NA	Europe	France	400	sedimentaires	FALSE	FALSE	FALSE	FALSE	NA	NA	NA	10.3	33	10.3	108	strong	0.001	NA	NA	0.001	0.001	0.001	1952-01-01	2011-01-01	84.21	84.21	aerial photography (transect) averaged	1.054	2.707	0.803	4.882	7.108	1.271	5.32159	2.25	18.709	0.168	556	15.2	14.2583	15.5
Evolution du trait de côte (histogrammes)	2016-01-29	MEEM	NA	Meem	NA	cerema_0185	NA	atlantic	Europe	France	200	undifferentiated recent marine deposits	FALSE	FALSE	FALSE	FALSE	NA	NA	NA	4.3	7	4.3	51	weak	0.001	NA	NA	0.001	0.001	0.001	1952-01-01	2011-01-01	59	59	aerial photography (transect) averaged	1.811	3.873	1.037	8.162	11.545	1.923	26.2661	4	9.969	3.586	690	18.3	11.4917	11.7
Evolution du trait de côte (histogrammes)	2016-01-29	MEEM	NA	Meem	NA	cerema_0186	NA	atlantic	Europe	France	600	schist	FALSE	FALSE	FALSE	FALSE	NA	NA	NA	4.6	8	4.6	61	strong	0.0816667	NA	NA	0.001	0.169	0.0816667	1952-01-01	2011-01-01	59	59	aerial photography (transect) averaged	1.811	3.873	1.037	8.162	11.545	1.923	26.2661	4	9.969	3.724	690	18.3	11.4917	11.7
Evolution du trait de côte (histogrammes)	2016-01-29	MEEM	NA	Meem	NA	cerema_0187	NA	atlantic	Europe	France	200	undifferentiated recent marine deposits	FALSE	FALSE	FALSE	FALSE	NA	NA	NA	1.6	4	1.6	144	weak	0.001	NA	NA	0.001	0.001	0.001	1952-01-01	2011-01-01	59	59	aerial photography (transect) averaged	1.811	3.873	1.037	8.162	11.545	1.923	26.2661	4	9.969	3.724	690	18.3	11.4917	11.7
Evolution du trait de côte (histogrammes)	2016-01-29	MEEM	NA	Meem	NA	cerema_0188	NA	atlantic	Europe	France	400	undifferentiated recent marine deposits	FALSE	FALSE	FALSE	FALSE	NA	NA	NA	1	1	1	292	weak	0.181	NA	NA	0.001	0.361	0.181	1952-01-01	2011-01-01	59	59	aerial photography (transect) averaged	1.811	3.873	1.037	8.162	11.545	1.923	26.2661	4	9.969	3.724	690	18.3	11.4917	11.7
Evolution du trait de côte (histogrammes)	2016-01-29	MEEM	NA	Meem	NA	cerema_0189	NA	atlantic	Europe	France	400	undifferentiated recent marine deposits	FALSE	FALSE	FALSE	FALSE	NA	NA	NA	2.8	7	2.8	32	weak	0.181	NA	NA	0.001	0.361	0.181	1952-01-01	2011-01-01	59	59	aerial photography (transect) averaged	1.811	3.873	1.037	8.162	11.545	1.923	26.2661	4	9.969	3.724	690	18.3	11.4917	11.7
Evolution du trait de côte (histogrammes)	2016-01-29	MEEM	NA	Meem	NA	cerema_0190	NA	atlantic	Europe	France	200	undifferentiated recent marine deposits	FALSE	FALSE	FALSE	FALSE	NA	NA	NA	7.1	10	7.1	100	weak	0.001	NA	NA	0.001	0.001	0.001	1952-01-01	2011-01-01	59	59	aerial photography (transect) averaged	1.811	3.873	1.037	8.162	11.545	1.923	26.2661	4	9.969	3.724	690	18.3	11.4917	11.7
Evolution du trait de côte (histogrammes)	2016-01-29	MEEM	NA	Meem	NA	cerema_0191	NA	atlantic	Europe	France	200	schist	FALSE	FALSE	FALSE	FALSE	NA	NA	NA	4.2	7	4.2	82	strong	0.001	NA	NA	0.001	0.001	0.001	1952-01-01	2011-01-01	59	59	aerial photography (transect) averaged	1.811	3.873	1.037	8.162	11.545	1.923	26.2661	4	9.969	3.724	690	18.3	11.4917	11.7
Evolution du trait de côte (histogrammes)	2016-01-29	MEEM	NA	Meem	NA	cerema_0192	NA	atlantic	Europe	France	400	undifferentiated recent marine deposits	FALSE	FALSE	FALSE	FALSE	NA	NA	NA	2	3	2	50	weak	0.0115	NA	NA	0.001	0.022	0.0115	1952-01-01	2011-01-01	59	59	aerial photography (transect) averaged	1.811	3.873	1.037	8.162	11.545	1.923	26.2661	4	9.969	3.724	690	18.3	11.4917	11.7
Evolution du trait de côte (histogrammes)	2016-01-29	MEEM	NA	Meem	NA	cerema_0193	mediterranean	NA	Europe	France	200	undifferentiated recent marine deposits	FALSE	FALSE	FALSE	FALSE	NA	NA	NA	10.4	25	10.4	133	weak	0.094	NA	NA	0.094	0.094	0.094	1952-01-01	2011-01-01	56.21	56.21	aerial photography (transect) averaged	1.054	2.707	0.803	4.882	7.108	1.271	5.32159	2.25	18.709	0.168	556	15.2	14.2583	15.5
Evolution du trait de côte (histogrammes)	2016-01-29	MEEM	NA	Meem	NA	cerema_0194	NA	atlantic	Europe	France	400	schist	FALSE	FALSE	FALSE	FALSE	NA	NA	NA	3.7	5	3.7	72	strong	0.0055	NA	NA	0.001	0.01	0.0055	1952-01-01	2011-01-01	59	59	aerial photography (transect) averaged	1.811	3.873	1.037	8.162	11.545	1.923	26.2661	4	9.969	3.724	690	18.3	11.4917	11.7
Evolution du trait de côte (histogrammes)	2016-01-29	MEEM	NA	Meem	NA	cerema_0195	NA	atlantic	Europe	France	200	undifferentiated recent marine deposits	FALSE	FALSE	FALSE	FALSE	NA	NA	NA	2	2	2	196	weak	0.209	NA	NA	0.209	0.209	0.209	1952-01-01	2011-01-01	59	59	aerial photography (transect) averaged	1.811	3.873	1.037	8.162	11.545	1.923	26.2661	4	9.969	3.724	690	18.3	11.4917	11.7
Evolution du trait de côte (histogrammes)	2016-01-29	MEEM	NA	Meem	NA	cerema_0196	NA	atlantic	Europe	France	200	schist	FALSE	FALSE	FALSE	FALSE	NA	NA	NA	4	4	4	97	strong	0.004	NA	NA	0.004	0.004	0.004	1952-01-01	2011-01-01	59	59	aerial photography (transect) averaged	1.811	3.873	1.037	8.162	11.545	1.923	26.2661	4	9.969	3.734	690	18.3	11.4917	11.7
Evolution du trait de côte (histogrammes)	2016-01-29	MEEM	NA	Meem	NA	cerema_0197	NA	atlantic	Europe	France	400	undifferentiated recent marine deposits	FALSE	FALSE	FALSE	FALSE	NA	NA	NA	4.2	6	4.2	318	weak	0.0415	NA	NA	0.001	0.082	0.0415	1952-01-01	2011-01-01	59	59	aerial photography (transect) averaged	1.811	3.873	1.037	8.162	11.545	1.923	26.2661	4	9.969	3.734	690	18.3	11.4917	11.7
Evolution du trait de côte (histogrammes)	2016-01-29	MEEM	NA	Meem	NA	cerema_0198	NA	atlantic	Europe	France	400	undifferentiated recent marine deposits	FALSE	FALSE	FALSE	FALSE	NA	NA	NA	8.3	10	8.3	52	weak	0.0415	NA	NA	0.001	0.082	0.0415	1952-01-01	2011-01-01	59	59	aerial photography (transect) averaged	1.811	3.873	1.037	8.162	11.545	1.923	26.2661	4	9.969	3.734	690	18.3	11.4917	11.7
Evolution du trait de côte (histogrammes)	2016-01-29	MEEM	NA	Meem	NA	cerema_0200	NA	atlantic	Europe	France	200	undifferentiated recent marine deposits	FALSE	FALSE	FALSE	FALSE	NA	NA	NA	7.7	10	7.7	9	weak	0.002	NA	NA	0.002	0.002	0.002	1952-01-01	2011-01-01	59	59	aerial photography (transect) averaged	1.811	3.873	1.037	8.162	11.545	1.923	26.2661	4	9.969	3.734	690	18.3	11.4917	11.7
Evolution du trait de côte (histogrammes)	2016-01-29	MEEM	NA	Meem	NA	cerema_0201	NA	atlantic	Europe	France	400	schist	FALSE	FALSE	FALSE	FALSE	NA	NA	NA	6.2	13	6.2	84	strong	0.002	NA	NA	0.001	0.003	0.002	1952-01-01	2011-01-01	59	59	aerial photography (transect) averaged	1.811	3.873	1.037	8.162	11.545	1.923	26.2661	4	9.969	3.734	690	18.3	11.4917	11.7
Evolution du trait de côte (histogrammes)	2016-01-29	MEEM	NA	Meem	NA	cerema_0202	NA	atlantic	Europe	France	400	schist	FALSE	FALSE	FALSE	FALSE	NA	NA	NA	7.1	14	7.1	81	strong	0.001	NA	NA	0.001	0.001	0.001	1952-01-01	2011-01-01	59	59	aerial photography (transect) averaged	1.811	3.873	1.037	8.162	11.545	1.923	26.2661	4	9.969	3.734	690	18.3	11.4917	11.7
Evolution du trait de côte (histogrammes)	2016-01-29	MEEM	NA	Meem	NA	cerema_0203	NA	atlantic	Europe	France	600	schist	FALSE	FALSE	FALSE	FALSE	NA	NA	NA	12.7	19	12.7	90	strong	0.001	NA	NA	0.001	0.001	0.001	1952-01-01	2011-01-01	59	59	aerial photography (transect) averaged	1.811	3.873	1.037	8.162	11.545	1.923	26.2661	4	9.969	3.734	690	18.3	11.4917	11.7
Evolution du trait de côte (histogrammes)	2016-01-29	MEEM	NA	Meem	NA	cerema_0204	NA	atlantic	Europe	France	600	schist	FALSE	FALSE	FALSE	FALSE	NA	NA	NA	7	13	7	67	strong	0.001	NA	NA	0.001	0.001	0.001	1952-01-01	2011-01-01	59	59	aerial photography (transect) averaged	1.811	3.873	1.037	8.162	11.545	1.923	26.2661	4	9.969	3.734	690	18.3	11.4917	11.7
Evolution du trait de côte (histogrammes)	2016-01-29	MEEM	NA	Meem	NA	cerema_0205	mediterranean	NA	Europe	France	200	glacial deposits	FALSE	FALSE	FALSE	FALSE	NA	NA	NA	24.1	55	24.1	79	weak	0.128	NA	NA	0.128	0.128	0.128	1952-01-01	2011-01-01	56.21	56.21	aerial photography (transect) averaged	1.054	2.707	0.803	4.882	7.108	1.271	5.32159	2.25	18.709	0.168	556	15.2	14.2583	15.5
Evolution du trait de côte (histogrammes)	2016-01-29	MEEM	NA	Meem	NA	cerema_0206	NA	atlantic	Europe	France	400		FALSE	FALSE	FALSE	FALSE	NA	NA	NA	5.3	8	5.3	101	weak	0.9085	NA	NA	0.64	1.177	0.9085	1952-01-01	2011-01-01	59	59	aerial photography (transect) averaged	1.811	3.873	1.037	8.162	11.545	1.923	26.2661	4	9.969	3.734	690	18.3	11.4917	11.7
Evolution du trait de côte (histogrammes)	2016-01-29	MEEM	NA	Meem	NA	cerema_0207	NA	atlantic	Europe	France	200		FALSE	FALSE	FALSE	FALSE	NA	NA	NA	8.6	13	8.6	103	weak	0.001	NA	NA	0.001	0.001	0.001	1952-01-01	2011-01-01	59	59	aerial photography (transect) averaged	1.811	3.873	1.037	8.162	11.545	1.923	26.2661	4	9.969	3.734	690	18.3	11.4917	11.7
Evolution du trait de côte (histogrammes)	2016-01-29	MEEM	NA	Meem	NA	cerema_0208	NA	atlantic	Europe	France	800	schist	FALSE	FALSE	FALSE	FALSE	NA	NA	NA	6.1	16	6.1	74	strong	0.001	NA	NA	0.001	0.001	0.001	1952-01-01	2011-01-01	59	59	aerial photography (transect) averaged	1.811	3.873	1.037	8.162	11.545	1.923	26.2661	4	9.969	3.734	640	22.5	11.35	12.6
Evolution du trait de côte (histogrammes)	2016-01-29	MEEM	NA	Meem	NA	cerema_0209	NA	atlantic	Europe	France	800	schist	FALSE	FALSE	FALSE	FALSE	NA	NA	NA	5	9	5	191	strong	0.001	NA	NA	0.001	0.001	0.001	1952-01-01	2011-01-01	59	59	aerial photography (transect) averaged	1.811	3.873	1.037	8.162	11.545	1.923	26.2661	4	9.969	3.734	690	18.3	11.4917	11.7
Evolution du trait de côte (histogrammes)	2016-01-29	MEEM	NA	Meem	NA	cerema_0210	NA	atlantic	Europe	France	800	gneiss	FALSE	FALSE	FALSE	FALSE	NA	NA	NA	11	20	11	266	strong	0.001	NA	NA	0.001	0.001	0.001	1952-01-01	2011-01-01	59	59	aerial photography (transect) averaged	1.811	3.873	1.037	8.162	11.545	1.923	26.2661	4	9.969	3.734	643	16.9	11.9667	12.6
Evolution du trait de côte (histogrammes)	2016-01-29	MEEM	NA	Meem	NA	cerema_0211	mediterranean	NA	Europe	France	3000	sedimentaires	FALSE	FALSE	FALSE	FALSE	NA	NA	NA	30.5	64	30.5	100	strong	0.001	NA	NA	0.001	0.001	0.001	1952-01-01	2011-01-01	56.21	56.21	aerial photography (transect) averaged	1.054	2.707	0.803	4.882	7.108	1.271	5.32159	2.25	18.709	0.165	556	15.2	14.2583	15.5
Evolution du trait de côte (histogrammes)	2016-01-29	MEEM	NA	Meem	NA	cerema_0212	mediterranean	NA	Europe	France	3000	sedimentaires	FALSE	FALSE	FALSE	FALSE	NA	NA	NA	21	42	21	31	strong	0.001	NA	NA	0.001	0.001	0.001	1952-01-01	2011-01-01	56.21	56.21	aerial photography (transect) averaged	1.054	2.707	0.803	4.882	7.108	1.271	5.32159	2.25	18.709	0.165	556	15.2	14.2583	15.5
Evolution du trait de côte (histogrammes)	2016-01-29	MEEM	NA	Meem	NA	cerema_0213	mediterranean	NA	Europe	France	3000	sedimentaires	FALSE	FALSE	FALSE	FALSE	NA	NA	NA	46.2	99	46.2	307	strong	0.001	NA	NA	0.001	0.001	0.001	1952-01-01	2011-01-01	56.21	56.21	aerial photography (transect) averaged	1.054	2.707	0.803	4.882	7.108	1.271	5.32159	2.25	18.709	0.165	556	15.2	14.2583	15.5
Evolution du trait de côte (histogrammes)	2016-01-29	MEEM	NA	Meem	NA	cerema_0214	NA	atlantic	Europe	France	200	gneiss	FALSE	FALSE	FALSE	FALSE	NA	NA	NA	8.6	16	8.6	193	strong	0.001	NA	NA	0.001	0.001	0.001	1952-01-01	2011-01-01	59	59	aerial photography (transect) averaged	1.811	3.873	1.037	8.162	11.545	1.923	26.2661	4	9.969	3.734	643	16.9	11.9667	12.6
Evolution du trait de côte (histogrammes)	2016-01-29	MEEM	NA	Meem	NA	cerema_0215	NA	atlantic	Europe	France	600	gneiss	FALSE	FALSE	FALSE	FALSE	NA	NA	NA	9.2	16	9.2	182	strong	0.001	NA	NA	0.001	0.001	0.001	1952-01-01	2011-01-01	59	59	aerial photography (transect) averaged	1.811	3.873	1.037	8.162	11.545	1.923	26.2661	4	9.969	3.734	643	16.9	11.9667	12.6
Evolution du trait de côte (histogrammes)	2016-01-29	MEEM	NA	Meem	NA	cerema_0216	NA	atlantic	Europe	France	1800	undifferentiated recent marine deposits	FALSE	FALSE	FALSE	FALSE	NA	NA	NA	13.1	18	13.1	158	weak	0.274111	NA	NA	0.008	0.602	0.274111	1952-01-01	2011-01-01	59	59	aerial photography (transect) averaged	1.811	3.873	1.037	8.162	11.545	1.923	26.2661	4	9.969	3.734	643	16.9	11.9667	12.6
Evolution du trait de côte (histogrammes)	2016-01-29	MEEM	NA	Meem	NA	cerema_0217	NA	atlantic	Europe	France	1800	undifferentiated recent marine deposits	FALSE	FALSE	FALSE	FALSE	NA	NA	NA	9.2	15	9.2	132	weak	0.274111	NA	NA	0.008	0.602	0.274111	1952-01-01	2011-01-01	59	59	aerial photography (transect) averaged	1.811	3.873	1.037	8.162	11.545	1.923	26.2661	4	9.969	3.734	643	16.9	11.9667	12.6
Evolution du trait de côte (histogrammes)	2016-01-29	MEEM	NA	Meem	NA	cerema_0218	NA	atlantic	Europe	France	800	schist	FALSE	FALSE	FALSE	FALSE	NA	NA	NA	9.5	15	9.5	219	strong	0.035	NA	NA	0.001	0.137	0.035	1952-01-01	2011-01-01	59	59	aerial photography (transect) averaged	1.811	3.873	1.037	8.162	11.545	1.923	26.2661	4	9.969	3.734	643	16.9	11.9667	12.6
Evolution du trait de côte (histogrammes)	2016-01-29	MEEM	NA	Meem	NA	cerema_0219	NA	atlantic	Europe	France	1600	schist	FALSE	FALSE	FALSE	FALSE	NA	NA	NA	8.9	16	8.9	131	strong	0.066625	NA	NA	0.001	0.362	0.066625	1952-01-01	2011-01-01	59	59	aerial photography (transect) averaged	1.811	3.873	1.037	8.162	11.545	1.923	26.2661	4	9.969	3.734	643	16.9	11.9667	12.6
Evolution du trait de côte (histogrammes)	2016-01-29	MEEM	NA	Meem	NA	cerema_0220	NA	atlantic	Europe	France	200	schist	FALSE	FALSE	FALSE	FALSE	NA	NA	NA	5.7	10	5.7	75	strong	0.001	NA	NA	0.001	0.001	0.001	1952-01-01	2011-01-01	59	59	aerial photography (transect) averaged	1.811	3.873	1.037	8.162	11.545	1.923	26.2661	4	9.969	3.734	643	16.9	11.9667	12.6
Evolution du trait de côte (histogrammes)	2016-01-29	MEEM	NA	Meem	NA	cerema_0221	NA	atlantic	Europe	France	400	granite	FALSE	FALSE	FALSE	FALSE	NA	NA	NA	3	4	3	192	strong	0.001	NA	NA	0.001	0.001	0.001	1952-01-01	2011-01-01	59	59	aerial photography (transect) averaged	1.811	3.873	1.037	8.162	11.545	1.923	26.2661	4	9.969	3.586	690	18.3	11.4917	11.7
Evolution du trait de côte (histogrammes)	2016-01-29	MEEM	NA	Meem	NA	cerema_0222	NA	atlantic	Europe	France	800	gneiss	FALSE	FALSE	FALSE	FALSE	NA	NA	NA	2	3	2	272	strong	0.01	NA	NA	0.001	0.037	0.01	1952-01-01	2011-01-01	59	59	aerial photography (transect) averaged	1.811	3.873	1.037	8.162	11.545	1.923	26.2661	4	9.969	3.586	690	18.3	11.4917	11.7
Evolution du trait de côte (histogrammes)	2016-01-29	MEEM	NA	Meem	NA	cerema_0223	NA	atlantic	Europe	France	200	gneiss	FALSE	FALSE	FALSE	FALSE	NA	NA	NA	2	3	2	120	strong	0.001	NA	NA	0.001	0.001	0.001	1952-01-01	2011-01-01	59	59	aerial photography (transect) averaged	1.811	3.873	1.037	8.162	11.545	1.923	26.2661	4	9.969	3.586	690	18.3	11.4917	11.7
Evolution du trait de côte (histogrammes)	2016-01-29	MEEM	NA	Meem	NA	cerema_0224	mediterranean	NA	Europe	France	400	fluvial deposits	FALSE	FALSE	FALSE	FALSE	NA	NA	NA	13.6	34	13.6	327	weak	0.103	NA	NA	0.057	0.149	0.103	1952-01-01	2011-01-01	87.21	87.21	aerial photography (transect) averaged	0.904	2.313	0.692	4.787	6.921	1.249	3.83851	2.25	19.163	0.162	587	12.5	14.4833	14.8
Evolution du trait de côte (histogrammes)	2016-01-29	MEEM	NA	Meem	NA	cerema_0225	mediterranean	NA	Europe	France	400	fluvial deposits	FALSE	FALSE	FALSE	FALSE	NA	NA	NA	5	5	5	45	weak	0.103	NA	NA	0.057	0.149	0.103	1952-01-01	2011-01-01	87.21	87.21	aerial photography (transect) averaged	0.904	2.313	0.692	4.787	6.921	1.249	3.83851	2.25	19.163	0.162	587	12.5	14.4833	14.8
Evolution du trait de côte (histogrammes)	2016-01-29	MEEM	NA	Meem	NA	cerema_0226	NA	atlantic	Europe	France	1000	gneiss	FALSE	FALSE	FALSE	FALSE	NA	NA	NA	4.1	8	4.1	360	strong	0.001	NA	NA	0.001	0.001	0.001	1952-01-01	2011-01-01	59	59	aerial photography (transect) averaged	1.811	3.873	1.037	8.162	11.545	1.923	26.2661	4	9.969	3.586	690	18.3	11.4917	11.7
Evolution du trait de côte (histogrammes)	2016-01-29	MEEM	NA	Meem	NA	cerema_0227	NA	atlantic	Europe	France	1800	granite	FALSE	FALSE	FALSE	FALSE	NA	NA	NA	2.8	8	2.8	360	strong	0.00144444	NA	NA	0.001	0.005	0.00144444	1952-01-01	2011-01-01	59	59	aerial photography (transect) averaged	1.811	3.873	1.037	8.162	11.545	1.923	26.2661	4	9.969	3.586	690	18.3	11.4917	11.7
Evolution du trait de côte (histogrammes)	2016-01-29	MEEM	NA	Meem	NA	cerema_0228	NA	atlantic	Europe	France	400	granite	FALSE	FALSE	FALSE	FALSE	NA	NA	NA	2.7	8	2.7	360	strong	0.001	NA	NA	0.001	0.001	0.001	1952-01-01	2011-01-01	59	59	aerial photography (transect) averaged	1.811	3.873	1.037	8.162	11.545	1.923	26.2661	4	9.969	3.586	690	18.3	11.4917	11.7
Evolution du trait de côte (histogrammes)	2016-01-29	MEEM	NA	Meem	NA	cerema_0229	NA	atlantic	Europe	France	2000	granite	FALSE	FALSE	FALSE	FALSE	NA	NA	NA	2.7	6	2.7	360	strong	0.001	NA	NA	0.001	0.001	0.001	1952-01-01	2011-01-01	59	59	aerial photography (transect) averaged	1.811	3.873	1.037	8.162	11.545	1.923	26.2661	4	9.969	3.586	690	18.3	11.4917	11.7
Evolution du trait de côte (histogrammes)	2016-01-29	MEEM	NA	Meem	NA	cerema_0230	mediterranean	NA	Europe	France	800	gneiss	FALSE	FALSE	FALSE	FALSE	NA	NA	NA	32.7	91	32.7	91	strong	0.001	NA	NA	0.001	0.001	0.001	1952-01-01	2011-01-01	87.21	87.21	aerial photography (transect) averaged	0.904	2.313	0.692	4.787	6.921	1.249	3.83851	2.25	19.163	0.162	587	12.5	14.4833	14.8
Evolution du trait de côte (histogrammes)	2016-01-29	MEEM	NA	Meem	NA	cerema_0231	NA	atlantic	Europe	France	400		FALSE	FALSE	FALSE	FALSE	NA	NA	NA	24.5	34	24.5	291	weak	0.001	NA	NA	0.001	0.001	0.001	1952-01-01	2011-01-01	59	59	aerial photography (transect) averaged	1.835	3.876	1.016	8.452	11.616	1.825	27.925	4.25	9.622	3.208	730	14.4	11.5833	11
Evolution du trait de côte (histogrammes)	2016-01-29	MEEM	NA	Meem	NA	cerema_0232	NA	atlantic	Europe	France	800	metamorphic	FALSE	FALSE	FALSE	FALSE	NA	NA	NA	2.4	4	2.4	167	strong	0.001	NA	NA	0.001	0.001	0.001	1952-01-01	2011-01-01	59	59	aerial photography (transect) averaged	1.811	3.873	1.037	8.162	11.545	1.923	26.2661	4	9.969	3.586	690	18.3	11.4917	11.7
Evolution du trait de côte (histogrammes)	2016-01-29	MEEM	NA	Meem	NA	cerema_0233	NA	atlantic	Europe	France	600	granite	FALSE	FALSE	FALSE	FALSE	NA	NA	NA	7	12	7	129	strong	0.0183333	NA	NA	0.001	0.053	0.0183333	1952-01-01	2011-01-01	59	59	aerial photography (transect) averaged	1.811	3.873	1.037	8.162	11.545	1.923	26.2661	4	9.969	3.586	690	18.3	11.4917	11.7
Evolution du trait de côte (histogrammes)	2016-01-29	MEEM	NA	Meem	NA	cerema_0234	NA	atlantic	Europe	France	1200	metamorphic	FALSE	FALSE	FALSE	FALSE	NA	NA	NA	1.5	2	1.5	360	strong	0.001	NA	NA	0.001	0.001	0.001	1952-01-01	2011-01-01	59	59	aerial photography (transect) averaged	1.811	3.873	1.037	8.162	11.545	1.923	26.2661	4	9.969	3.586	690	18.3	11.4917	11.7
Evolution du trait de côte (histogrammes)	2016-01-29	MEEM	NA	Meem	NA	cerema_0235	NA	atlantic	Europe	France	400	gneiss	FALSE	FALSE	FALSE	FALSE	NA	NA	NA	1.5	2	1.5	207	strong	0.0515	NA	NA	0.001	0.102	0.0515	1952-01-01	2011-01-01	59	59	aerial photography (transect) averaged	1.811	3.873	1.037	8.162	11.545	1.923	26.2661	4	9.969	3.586	690	18.3	11.4917	11.7
Evolution du trait de côte (histogrammes)	2016-01-29	MEEM	NA	Meem	NA	cerema_0236	NA	atlantic	Europe	France	600	gneiss	FALSE	FALSE	FALSE	FALSE	NA	NA	NA	3.6	11	3.6	160	strong	0.001	NA	NA	0.001	0.001	0.001	1952-01-01	2011-01-01	59	59	aerial photography (transect) averaged	1.811	3.873	1.037	8.162	11.545	1.923	26.2661	4	9.969	3.586	690	18.3	11.4917	11.7
Evolution du trait de côte (histogrammes)	2016-01-29	MEEM	NA	Meem	NA	cerema_0237	NA	atlantic	Europe	France	800	gneiss	FALSE	FALSE	FALSE	FALSE	NA	NA	NA	4.3	8	4.3	105	strong	0.00975	NA	NA	0.001	0.036	0.00975	1952-01-01	2011-01-01	59	59	aerial photography (transect) averaged	1.811	3.873	1.037	8.162	11.545	1.923	26.2661	4	9.969	3.586	690	18.3	11.4917	11.7
Evolution du trait de côte (histogrammes)	2016-01-29	MEEM	NA	Meem	NA	cerema_0238	NA	atlantic	Europe	France	200	gneiss	FALSE	FALSE	FALSE	FALSE	NA	NA	NA	4.7	6	4.7	80	strong	0.001	NA	NA	0.001	0.001	0.001	1952-01-01	2011-01-01	59	59	aerial photography (transect) averaged	1.811	3.873	1.037	8.162	11.545	1.923	26.2661	4	9.969	3.586	690	18.3	11.4917	11.7
Evolution du trait de côte (histogrammes)	2016-01-29	MEEM	NA	Meem	NA	cerema_0239	NA	atlantic	Europe	France	400	gneiss	FALSE	FALSE	FALSE	FALSE	NA	NA	NA	3.3	7	3.3	20	strong	0.001	NA	NA	0.001	0.001	0.001	1952-01-01	2011-01-01	59	59	aerial photography (transect) averaged	1.811	3.873	1.037	8.162	11.545	1.923	26.2661	4	9.969	3.586	690	18.3	11.4917	11.7
Evolution du trait de côte (histogrammes)	2016-01-29	MEEM	NA	Meem	NA	cerema_0240	NA	atlantic	Europe	France	1000	gneiss	FALSE	FALSE	FALSE	FALSE	NA	NA	NA	4.7	11	4.7	57	strong	0.001	NA	NA	0.001	0.001	0.001	1952-01-01	2011-01-01	59	59	aerial photography (transect) averaged	1.811	3.873	1.037	8.162	11.545	1.923	26.2661	4	9.969	3.586	690	18.3	11.4917	11.7
Evolution du trait de côte (histogrammes)	2016-01-29	MEEM	NA	Meem	NA	cerema_0241	NA	atlantic	Europe	France	200	gneiss	FALSE	FALSE	FALSE	FALSE	NA	NA	NA	1	1	1	155	strong	0.064	NA	NA	0.064	0.064	0.064	1952-01-01	2011-01-01	59	59	aerial photography (transect) averaged	1.811	3.873	1.037	8.162	11.545	1.923	26.2661	4	9.969	3.586	690	18.3	11.4917	11.7
Evolution du trait de côte (histogrammes)	2016-01-29	MEEM	NA	Meem	NA	cerema_0242	NA	atlantic	Europe	France	400	gneiss	FALSE	FALSE	FALSE	FALSE	NA	NA	NA	1	1	1	107	strong	0.001	NA	NA	0.001	0.001	0.001	1952-01-01	2011-01-01	59	59	aerial photography (transect) averaged	1.811	3.873	1.037	8.162	11.545	1.923	26.2661	4	9.969	3.586	690	18.3	11.4917	11.7
Evolution du trait de côte (histogrammes)	2016-01-29	MEEM	NA	Meem	NA	cerema_0243	mediterranean	NA	Europe	France	400	metamorphic	FALSE	FALSE	FALSE	FALSE	NA	NA	NA	27.1	87	27.1	52	strong	0.001	NA	NA	0.001	0.001	0.001	1952-01-01	2011-01-01	87.21	87.21	aerial photography (transect) averaged	0.904	2.313	0.692	4.787	6.921	1.249	3.83851	2.25	19.163	0.162	587	12.5	14.4833	14.8
Evolution du trait de côte (histogrammes)	2016-01-29	MEEM	NA	Meem	NA	cerema_0244	NA	atlantic	Europe	France	200	gneiss	FALSE	FALSE	FALSE	FALSE	NA	NA	NA	1.6	3	1.6	132	strong	0.16	NA	NA	0.16	0.16	0.16	1952-01-01	2011-01-01	59	59	aerial photography (transect) averaged	1.811	3.873	1.037	8.162	11.545	1.923	26.2661	4	9.969	3.586	690	18.3	11.4917	11.7
Evolution du trait de côte (histogrammes)	2016-01-29	MEEM	NA	Meem	NA	cerema_0245	NA	atlantic	Europe	France	600	gneiss	FALSE	FALSE	FALSE	FALSE	NA	NA	NA	1.5	3	1.5	33	strong	0.0233333	NA	NA	0.001	0.068	0.0233333	1952-01-01	2011-01-01	59	59	aerial photography (transect) averaged	1.811	3.873	1.037	8.162	11.545	1.923	26.2661	4	9.969	3.586	690	18.3	11.4917	11.7
Evolution du trait de côte (histogrammes)	2016-01-29	MEEM	NA	Meem	NA	cerema_0246	NA	atlantic	Europe	France	200	gneiss	FALSE	FALSE	FALSE	FALSE	NA	NA	NA	3	5	3	4	strong	0.074	NA	NA	0.074	0.074	0.074	1952-01-01	2011-01-01	59	59	aerial photography (transect) averaged	1.811	3.873	1.037	8.162	11.545	1.923	26.2661	4	9.969	3.586	690	18.3	11.4917	11.7
Evolution du trait de côte (histogrammes)	2016-01-29	MEEM	NA	Meem	NA	cerema_0247	NA	atlantic	Europe	France	400	gneiss	FALSE	FALSE	FALSE	FALSE	NA	NA	NA	3.2	5	3.2	286	strong	0.001	NA	NA	0.001	0.001	0.001	1952-01-01	2011-01-01	59	59	aerial photography (transect) averaged	1.811	3.873	1.037	8.162	11.545	1.923	26.2661	4	9.969	3.586	690	18.3	11.4917	11.7
Evolution du trait de côte (histogrammes)	2016-01-29	MEEM	NA	Meem	NA	cerema_0248	NA	atlantic	Europe	France	1000	metamorphic	FALSE	FALSE	FALSE	FALSE	NA	NA	NA	5.2	11	5.2	322	strong	0.001	NA	NA	0.001	0.001	0.001	1952-01-01	2011-01-01	59	59	aerial photography (transect) averaged	1.811	3.873	1.037	8.162	11.545	1.923	26.2661	4	9.969	3.586	690	18.3	11.4917	11.7
Evolution du trait de côte (histogrammes)	2016-01-29	MEEM	NA	Meem	NA	cerema_0249	NA	atlantic	Europe	France	200	metamorphic	FALSE	FALSE	FALSE	FALSE	NA	NA	NA	3	3	3	142	strong	0.001	NA	NA	0.001	0.001	0.001	1952-01-01	2011-01-01	59	59	aerial photography (transect) averaged	1.811	3.873	1.037	8.162	11.545	1.923	26.2661	4	9.969	3.586	690	18.3	11.4917	11.7
Evolution du trait de côte (histogrammes)	2016-01-29	MEEM	NA	Meem	NA	cerema_0250	NA	atlantic	Europe	France	600	metamorphic	FALSE	FALSE	FALSE	FALSE	NA	NA	NA	13.5	21	13.5	296	strong	0.0253333	NA	NA	0.001	0.074	0.0253333	1952-01-01	2011-01-01	59	59	aerial photography (transect) averaged	1.811	3.873	1.037	8.162	11.545	1.923	26.2661	4	9.969	3.586	690	18.3	11.4917	11.7
Evolution du trait de côte (histogrammes)	2016-01-29	MEEM	NA	Meem	NA	cerema_0251	NA	atlantic	Europe	France	400	granite	FALSE	FALSE	FALSE	FALSE	NA	NA	NA	9.6	18	9.6	307	strong	0.001	NA	NA	0.001	0.001	0.001	1952-01-01	2011-01-01	59	59	aerial photography (transect) averaged	1.811	3.873	1.037	8.162	11.545	1.923	26.2661	4	9.969	3.586	690	18.3	11.4917	11.7
Evolution du trait de côte (histogrammes)	2016-01-29	MEEM	NA	Meem	NA	cerema_0252	NA	atlantic	Europe	France	400	granite	FALSE	FALSE	FALSE	FALSE	NA	NA	NA	11.8	22	11.8	54	strong	0.001	NA	NA	0.001	0.001	0.001	1952-01-01	2011-01-01	59	59	aerial photography (transect) averaged	1.811	3.873	1.037	8.162	11.545	1.923	26.2661	4	9.969	3.586	690	18.3	11.4917	11.7
Evolution du trait de côte (histogrammes)	2016-01-29	MEEM	NA	Meem	NA	cerema_0253	mediterranean	NA	Europe	France	1000	schist	FALSE	FALSE	FALSE	FALSE	NA	NA	NA	28.8	83	28.8	91	strong	0.0216	NA	NA	0.001	0.104	0.0216	1952-01-01	2011-01-01	87.21	87.21	aerial photography (transect) averaged	0.904	2.313	0.692	4.787	6.921	1.249	3.83851	2.25	19.163	0.162	587	12.5	14.4833	14.8
Evolution du trait de côte (histogrammes)	2016-01-29	MEEM	NA	Meem	NA	cerema_0254	NA	atlantic	Europe	France	200	granite	FALSE	FALSE	FALSE	FALSE	NA	NA	NA	3.4	6	3.4	253	strong	0.001	NA	NA	0.001	0.001	0.001	1952-01-01	2011-01-01	59	59	aerial photography (transect) averaged	1.811	3.873	1.037	8.162	11.545	1.923	26.2661	4	9.969	3.586	690	18.3	11.4917	11.7
Evolution du trait de côte (histogrammes)	2016-01-29	MEEM	NA	Meem	NA	cerema_0255	NA	atlantic	Europe	France	400	granite	FALSE	FALSE	FALSE	FALSE	NA	NA	NA	8	12	8	337	strong	0.001	NA	NA	0.001	0.001	0.001	1952-01-01	2011-01-01	59	59	aerial photography (transect) averaged	1.811	3.873	1.037	8.162	11.545	1.923	26.2661	4	9.969	3.586	690	18.3	11.4917	11.7
Evolution du trait de côte (histogrammes)	2016-01-29	MEEM	NA	Meem	NA	cerema_0256	NA	atlantic	Europe	France	400	granite	FALSE	FALSE	FALSE	FALSE	NA	NA	NA	14.8	23	14.8	41	strong	0.001	NA	NA	0.001	0.001	0.001	1952-01-01	2011-01-01	59	59	aerial photography (transect) averaged	1.811	3.873	1.037	8.162	11.545	1.923	26.2661	4	9.969	3.586	690	18.3	11.4917	11.7
Evolution du trait de côte (histogrammes)	2016-01-29	MEEM	NA	Meem	NA	cerema_0257	NA	atlantic	Europe	France	200	granite	FALSE	FALSE	FALSE	FALSE	NA	NA	NA	23	23	23	27	strong	0.078	NA	NA	0.078	0.078	0.078	1952-01-01	2011-01-01	59	59	aerial photography (transect) averaged	1.811	3.873	1.037	8.162	11.545	1.923	26.2661	4	9.969	3.586	690	18.3	11.4917	11.7
Evolution du trait de côte (histogrammes)	2016-01-29	MEEM	NA	Meem	NA	cerema_0258	NA	atlantic	Europe	France	1400	granite	FALSE	FALSE	FALSE	FALSE	NA	NA	NA	12.1	23	12.1	244	strong	0.014	NA	NA	0.001	0.092	0.014	1952-01-01	2011-01-01	59	59	aerial photography (transect) averaged	1.811	3.873	1.037	8.162	11.545	1.923	26.2661	4	9.969	3.586	690	18.3	11.4917	11.7
Evolution du trait de côte (histogrammes)	2016-01-29	MEEM	NA	Meem	NA	cerema_0259	NA	atlantic	Europe	France	400	granite	FALSE	FALSE	FALSE	FALSE	NA	NA	NA	16.8	26	16.8	225	strong	0.001	NA	NA	0.001	0.001	0.001	1952-01-01	2011-01-01	59	59	aerial photography (transect) averaged	1.811	3.873	1.037	8.162	11.545	1.923	26.2661	4	9.969	3.586	690	18.3	11.4917	11.7
Evolution du trait de côte (histogrammes)	2016-01-29	MEEM	NA	Meem	NA	cerema_0260	NA	atlantic	Europe	France	400	granite	FALSE	FALSE	FALSE	FALSE	NA	NA	NA	9	17	9	187	strong	0.001	NA	NA	0.001	0.001	0.001	1952-01-01	2011-01-01	59	59	aerial photography (transect) averaged	1.811	3.873	1.037	8.162	11.545	1.923	26.2661	4	9.969	3.586	690	18.3	11.4917	11.7
Evolution du trait de côte (histogrammes)	2016-01-29	MEEM	NA	Meem	NA	cerema_0261	NA	atlantic	Europe	France	200	aeolianite	FALSE	FALSE	FALSE	FALSE	NA	NA	NA	9.2	18	9.2	221	weak	0.001	NA	NA	0.001	0.001	0.001	1952-01-01	2011-01-01	57	57	aerial photography (transect) averaged	1.591	3.325	0.881	7.349	10.564	1.737	18.2528	3.25	12.722	5.243	874	18.2	11.1167	10.1
Evolution du trait de côte (histogrammes)	2016-01-29	MEEM	NA	Meem	NA	cerema_0262	NA	atlantic	Europe	France	400	granite	FALSE	FALSE	FALSE	FALSE	NA	NA	NA	5.3	8	5.3	281	strong	0.001	NA	NA	0.001	0.001	0.001	1952-01-01	2011-01-01	57	57	aerial photography (transect) averaged	2.038	4.227	1.105	8.3	11.538	1.827	33.8258	4	9.782	5.243	874	18.2	11.1167	10.1
Evolution du trait de côte (histogrammes)	2016-01-29	MEEM	NA	Meem	NA	cerema_0263	NA	atlantic	Europe	France	600	aeolianite	FALSE	FALSE	FALSE	FALSE	NA	NA	NA	9.3	13	9.3	222	weak	0.081	NA	NA	0.001	0.122	0.081	1952-01-01	2011-01-01	57	57	aerial photography (transect) averaged	2.038	4.227	1.105	8.3	11.538	1.827	33.8258	4	9.782	5.126	874	18.2	11.1167	10.1
Evolution du trait de côte (histogrammes)	2016-01-29	MEEM	NA	Meem	NA	cerema_0264	NA	atlantic	Europe	France	200	fluvial deposits	FALSE	FALSE	FALSE	FALSE	NA	NA	NA	35.8	51	35.8	295	weak	0.001	NA	NA	0.001	0.001	0.001	1952-01-01	2011-01-01	56	56	aerial photography (transect) averaged	1.591	3.325	0.881	7.349	10.564	1.737	18.2528	3.25	12.722	7.11	796	25.9	10.9917	11.2
Evolution du trait de côte (histogrammes)	2016-01-29	MEEM	NA	Meem	NA	cerema_0265	NA	atlantic	Europe	France	200	gneiss	FALSE	FALSE	FALSE	FALSE	NA	NA	NA	24.8	51	24.8	40	strong	0.001	NA	NA	0.001	0.001	0.001	1952-01-01	2011-01-01	56	56	aerial photography (transect) averaged	1.591	3.325	0.881	7.349	10.564	1.737	18.2528	3.25	12.722	7.11	796	25.9	10.9917	11.2
Evolution du trait de côte (histogrammes)	2016-01-29	MEEM	NA	Meem	NA	cerema_0266	NA	atlantic	Europe	France	400	gneiss	FALSE	FALSE	FALSE	FALSE	NA	NA	NA	14.4	50	14.4	359	strong	0.001	NA	NA	0.001	0.001	0.001	1952-01-01	2011-01-01	56	56	aerial photography (transect) averaged	1.591	3.325	0.881	7.349	10.564	1.737	18.2528	3.25	12.722	7.11	796	25.9	10.9917	11.2
Evolution du trait de côte (histogrammes)	2016-01-29	MEEM	NA	Meem	NA	cerema_0267	NA	atlantic	Europe	France	600	loess and silts	FALSE	FALSE	FALSE	FALSE	NA	NA	NA	12.2	19	12.2	83	weak	0.001	NA	NA	0.001	0.001	0.001	1952-01-01	2011-01-01	56	56	aerial photography (transect) averaged	1.591	3.325	0.881	7.349	10.564	1.737	18.2528	3.25	12.722	6.359	714	19.5	11.1417	10.5
Evolution du trait de côte (histogrammes)	2016-01-29	MEEM	NA	Meem	NA	cerema_0268	mediterranean	NA	Europe	France	1000	schist	FALSE	FALSE	FALSE	FALSE	NA	NA	NA	12	12	12	179	strong	0.0352	NA	NA	0.001	0.172	0.0352	1952-01-01	2011-01-01	87.21	87.21	aerial photography (transect) averaged	0.904	2.313	0.692	4.787	6.921	1.249	3.83851	2.25	19.163	0.163	587	12.5	14.4833	14.8
Evolution du trait de côte (histogrammes)	2016-01-29	MEEM	NA	Meem	NA	cerema_0269	mediterranean	NA	Europe	France	1000	schist	FALSE	FALSE	FALSE	FALSE	NA	NA	NA	28.2	74	28.2	30	strong	0.0352	NA	NA	0.001	0.172	0.0352	1952-01-01	2011-01-01	87.21	87.21	aerial photography (transect) averaged	0.904	2.313	0.692	4.787	6.921	1.249	3.83851	2.25	19.163	0.163	587	12.5	14.4833	14.8
Evolution du trait de côte (histogrammes)	2016-01-29	MEEM	NA	Meem	NA	cerema_0270	NA	atlantic	Europe	France	200	volcanic rock	FALSE	FALSE	FALSE	FALSE	NA	NA	NA	23.2	48	23.2	357	strong	0.001	NA	NA	0.001	0.001	0.001	1952-01-01	2011-01-01	56	56	aerial photography (transect) averaged	1.591	3.325	0.881	7.349	10.564	1.737	18.2528	3.25	12.722	6.359	714	19.5	11.1417	10.5
Evolution du trait de côte (histogrammes)	2016-01-29	MEEM	NA	Meem	NA	cerema_0271	NA	atlantic	Europe	France	600	lavas (basalts, etc)	FALSE	FALSE	FALSE	FALSE	NA	NA	NA	36.4	67	36.4	204	strong	0.0213333	NA	NA	0.001	0.062	0.0213333	1952-01-01	2011-01-01	56	56	aerial photography (transect) averaged	1.591	3.325	0.881	7.349	10.564	1.737	18.2528	3.25	12.722	5.776	754	15.7	11.225	10.2
Evolution du trait de côte (histogrammes)	2016-01-29	MEEM	NA	Meem	NA	cerema_0272	NA	atlantic	Europe	France	600	sedimentaires	FALSE	FALSE	FALSE	FALSE	NA	NA	NA	56.7	84	56.7	193	strong	0.001	NA	NA	0.001	0.001	0.001	1952-01-01	2011-01-01	56	56	aerial photography (transect) averaged	1.591	3.325	0.881	7.349	10.564	1.737	18.2528	3.25	12.722	5.776	754	15.7	11.225	10.2
Evolution du trait de côte (histogrammes)	2016-01-29	MEEM	NA	Meem	NA	cerema_0273	NA	atlantic	Europe	France	600	intermediate rocks	FALSE	FALSE	FALSE	FALSE	NA	NA	NA	22.5	46	22.5	170	strong	0.001	NA	NA	0.001	0.001	0.001	1952-01-01	2011-01-01	56	56	aerial photography (transect) averaged	1.591	3.325	0.881	7.349	10.564	1.737	18.2528	3.25	12.722	5.776	754	15.7	11.225	10.2
Evolution du trait de côte (histogrammes)	2016-01-29	MEEM	NA	Meem	NA	cerema_0274	NA	atlantic	Europe	France	800	sedimentaires	FALSE	FALSE	FALSE	FALSE	NA	NA	NA	26.1	56	26.1	100	strong	0.001	NA	NA	0.001	0.001	0.001	1952-01-01	2011-01-01	56	56	aerial photography (transect) averaged	1.591	3.325	0.881	7.349	10.564	1.737	18.2528	3.25	12.722	5.776	754	15.7	11.225	10.2
Evolution du trait de côte (histogrammes)	2016-01-29	MEEM	NA	Meem	NA	cerema_0275	mediterranean	NA	Europe	France	200	undifferentiated recent marine deposits	FALSE	FALSE	FALSE	FALSE	NA	NA	NA	15.4	31	15.4	60	weak	0.242	NA	NA	0.242	0.242	0.242	1952-01-01	2011-01-01	87.21	87.21	aerial photography (transect) averaged	0.904	2.313	0.692	4.787	6.921	1.249	3.83851	2.25	19.163	0.163	587	12.5	14.4833	14.8
Evolution du trait de côte (histogrammes)	2016-01-29	MEEM	NA	Meem	NA	cerema_0276	NA	atlantic	Europe	France	800	gneiss	FALSE	FALSE	FALSE	FALSE	NA	NA	NA	44	59	44	286	strong	0.001	NA	NA	0.001	0.001	0.001	1952-01-01	2011-01-01	56	56	aerial photography (transect) averaged	1.591	3.325	0.881	7.349	10.564	1.737	18.2528	3.25	12.722	6.878	796	25.9	10.9917	11.2
Evolution du trait de côte (histogrammes)	2016-01-29	MEEM	NA	Meem	NA	cerema_0277	NA	atlantic	Europe	France	200	volcanic rock	FALSE	FALSE	FALSE	FALSE	NA	NA	NA	47.7	60	47.7	268	strong	0.001	NA	NA	0.001	0.001	0.001	1952-01-01	2011-01-01	56	56	aerial photography (transect) averaged	1.591	3.325	0.881	7.349	10.564	1.737	18.2528	3.25	12.722	6.878	796	25.9	10.9917	11.2
Evolution du trait de côte (histogrammes)	2016-01-29	MEEM	NA	Meem	NA	cerema_0278	NA	atlantic	Europe	France	3600	intermediate rocks	FALSE	FALSE	FALSE	FALSE	NA	NA	NA	42.1	77	42.1	346	strong	0.001	NA	NA	0.001	0.001	0.001	1952-01-01	2011-01-01	56	56	aerial photography (transect) averaged	1.591	3.325	0.881	7.349	10.564	1.737	18.2528	3.25	12.722	6.878	796	25.9	10.9917	11.2
Evolution du trait de côte (histogrammes)	2016-01-29	MEEM	NA	Meem	NA	cerema_0279	NA	atlantic	Europe	France	3600	intermediate rocks	FALSE	FALSE	FALSE	FALSE	NA	NA	NA	48.1	88	48.1	300	strong	0.001	NA	NA	0.001	0.001	0.001	1952-01-01	2011-01-01	56	56	aerial photography (transect) averaged	1.591	3.325	0.881	7.349	10.564	1.737	18.2528	3.25	12.722	6.878	796	25.9	10.9917	11.2
Evolution du trait de côte (histogrammes)	2016-01-29	MEEM	NA	Meem	NA	cerema_0280	NA	atlantic	Europe	France	3600	intermediate rocks	FALSE	FALSE	FALSE	FALSE	NA	NA	NA	51.9	91	51.9	280	strong	0.001	NA	NA	0.001	0.001	0.001	1952-01-01	2011-01-01	56	56	aerial photography (transect) averaged	1.591	3.325	0.881	7.349	10.564	1.737	18.2528	3.25	12.722	6.878	796	25.9	10.9917	11.2
Evolution du trait de côte (histogrammes)	2016-01-29	MEEM	NA	Meem	NA	cerema_0281	NA	atlantic	Europe	France	3600	intermediate rocks	FALSE	FALSE	FALSE	FALSE	NA	NA	NA	50.3	74	50.3	290	strong	0.001	NA	NA	0.001	0.001	0.001	1952-01-01	2011-01-01	56	56	aerial photography (transect) averaged	1.591	3.325	0.881	7.349	10.564	1.737	18.2528	3.25	12.722	6.878	796	25.9	10.9917	11.2
Evolution du trait de côte (histogrammes)	2016-01-29	MEEM	NA	Meem	NA	cerema_0282	NA	atlantic	Europe	France	1000	volcanic rock	FALSE	FALSE	FALSE	FALSE	NA	NA	NA	46.2	78	46.2	327	strong	0.001	NA	NA	0.001	0.001	0.001	1952-01-01	2011-01-01	56	56	aerial photography (transect) averaged	1.591	3.325	0.881	7.349	10.564	1.737	18.2528	3.25	12.722	6.878	796	25.9	10.9917	11.2
Evolution du trait de côte (histogrammes)	2016-01-29	MEEM	NA	Meem	NA	cerema_0283	NA	atlantic	Europe	France	400	sandstone	FALSE	FALSE	FALSE	FALSE	NA	NA	NA	55.5	83	55.5	346	strong	0.001	NA	NA	0.001	0.001	0.001	1952-01-01	2011-01-01	56	56	aerial photography (transect) averaged	1.591	3.325	0.881	7.349	10.564	1.737	18.2528	3.25	12.722	6.878	796	25.9	10.9917	11.2
Evolution du trait de côte (histogrammes)	2016-01-29	MEEM	NA	Meem	NA	cerema_0284	NA	atlantic	Europe	France	1000	volcanic rock	FALSE	FALSE	FALSE	FALSE	NA	NA	NA	39.8	81	39.8	283	strong	0.001	NA	NA	0.001	0.001	0.001	1952-01-01	2011-01-01	56	56	aerial photography (transect) averaged	1.591	3.325	0.881	7.349	10.564	1.737	18.2528	3.25	12.722	6.878	796	25.9	10.9917	11.2
Evolution du trait de côte (histogrammes)	2016-01-29	MEEM	NA	Meem	NA	cerema_0285	NA	atlantic	Europe	France	400	sedimentaires	FALSE	FALSE	FALSE	FALSE	NA	NA	NA	39.6	73	39.6	278	strong	0.001	NA	NA	0.001	0.001	0.001	1952-01-01	2011-01-01	56	56	aerial photography (transect) averaged	1.591	3.325	0.881	7.349	10.564	1.737	18.2528	3.25	12.722	6.878	796	25.9	10.9917	11.2
Evolution du trait de côte (histogrammes)	2016-01-29	MEEM	NA	Meem	NA	cerema_0286	NA	atlantic	Europe	France	6400	sandstone	FALSE	FALSE	FALSE	FALSE	NA	NA	NA	37.6	70	37.6	320	strong	0.001	NA	NA	0.001	0.001	0.001	1952-01-01	2011-01-01	56	56	aerial photography (transect) averaged	1.591	3.325	0.881	7.349	10.564	1.737	18.2528	3.25	12.722	6.878	796	25.9	10.9917	11.2
Evolution du trait de côte (histogrammes)	2016-01-29	MEEM	NA	Meem	NA	cerema_0287	NA	atlantic	Europe	France	400	sandstone	FALSE	FALSE	FALSE	FALSE	NA	NA	NA	42.1	69	42.1	271	strong	0.001	NA	NA	0.001	0.001	0.001	1952-01-01	2011-01-01	56	56	aerial photography (transect) averaged	1.591	3.325	0.881	7.349	10.564	1.737	18.2528	3.25	12.722	6.878	796	25.9	10.9917	11.2
Evolution du trait de côte (histogrammes)	2016-01-29	MEEM	NA	Meem	NA	cerema_0288	NA	atlantic	Europe	France	400	sandstone	FALSE	FALSE	FALSE	FALSE	NA	NA	NA	32	64	32	256	strong	0.001	NA	NA	0.001	0.001	0.001	1952-01-01	2011-01-01	56	56	aerial photography (transect) averaged	1.591	3.325	0.881	7.349	10.564	1.737	18.2528	3.25	12.722	6.878	796	25.9	10.9917	11.2
Evolution du trait de côte (histogrammes)	2016-01-29	MEEM	NA	Meem	NA	cerema_0289	mediterranean	NA	Europe	France	1000	schist	FALSE	FALSE	FALSE	FALSE	NA	NA	NA	30.6	87	30.6	74	strong	0.001	NA	NA	0.001	0.001	0.001	1952-01-01	2011-01-01	87.21	87.21	aerial photography (transect) averaged	0.904	2.313	0.692	4.787	6.921	1.249	3.83851	2.25	19.163	0.163	587	12.5	14.4833	14.8
Evolution du trait de côte (histogrammes)	2016-01-29	MEEM	NA	Meem	NA	cerema_0290	NA	atlantic	Europe	France	400	lavas (basalts, etc)	FALSE	FALSE	FALSE	FALSE	NA	NA	NA	5.4	10	5.4	144	strong	0.001	NA	NA	0.001	0.001	0.001	1952-01-01	2011-01-01	56	56	aerial photography (transect) averaged	1.591	3.325	0.881	7.349	10.564	1.737	18.2528	3.25	12.722	5.776	754	15.7	11.225	10.2
Evolution du trait de côte (histogrammes)	2016-01-29	MEEM	NA	Meem	NA	cerema_0291	NA	atlantic	Europe	France	800	granite	FALSE	FALSE	FALSE	FALSE	NA	NA	NA	41.2	64	41.2	185	strong	0.001	NA	NA	0.001	0.001	0.001	1952-01-01	2011-01-01	56	56	aerial photography (transect) averaged	1.591	3.325	0.881	7.349	10.564	1.737	18.2528	3.25	12.722	5.776	754	15.7	11.225	10.2
Evolution du trait de côte (histogrammes)	2016-01-29	MEEM	NA	Meem	NA	cerema_0292	NA	atlantic	Europe	France	200		FALSE	FALSE	FALSE	FALSE	NA	NA	NA	22.5	49	22.5	198	weak	0.001	NA	NA	0.001	0.001	0.001	1952-01-01	2011-01-01	56	56	aerial photography (transect) averaged	1.591	3.325	0.881	7.349	10.564	1.737	18.2528	3.25	12.722	5.776	754	15.7	11.225	10.2
Evolution du trait de côte (histogrammes)	2016-01-29	MEEM	NA	Meem	NA	cerema_0293	NA	atlantic	Europe	France	800	granite	FALSE	FALSE	FALSE	FALSE	NA	NA	NA	30	68	30	95	strong	0.001	NA	NA	0.001	0.001	0.001	1952-01-01	2011-01-01	56	56	aerial photography (transect) averaged	1.591	3.325	0.881	7.349	10.564	1.737	18.2528	3.25	12.722	5.776	754	15.7	11.225	10.2
Evolution du trait de côte (histogrammes)	2016-01-29	MEEM	NA	Meem	NA	cerema_0294	NA	atlantic	Europe	France	800	gneiss	FALSE	FALSE	FALSE	FALSE	NA	NA	NA	18.1	31	18.1	337	strong	0.001	NA	NA	0.001	0.001	0.001	1952-01-01	2011-01-01	56	56	aerial photography (transect) averaged	1.591	3.325	0.881	7.349	10.564	1.737	18.2528	3.25	12.722	7.643	762	27.2	11.0333	11.6
Evolution du trait de côte (histogrammes)	2016-01-29	MEEM	NA	Meem	NA	cerema_0295	NA	atlantic	Europe	France	800	gneiss	FALSE	FALSE	FALSE	FALSE	NA	NA	NA	19	28	19	304	strong	0.001	NA	NA	0.001	0.001	0.001	1952-01-01	2011-01-01	56	56	aerial photography (transect) averaged	1.591	3.325	0.881	7.349	10.564	1.737	18.2528	3.25	12.722	7.643	762	27.2	11.0333	11.6
Evolution du trait de côte (histogrammes)	2016-01-29	MEEM	NA	Meem	NA	cerema_0296	NA	atlantic	Europe	France	1000	gneiss	FALSE	FALSE	FALSE	FALSE	NA	NA	NA	11.5	23	11.5	214	strong	0.001	NA	NA	0.001	0.001	0.001	1952-01-01	2011-01-01	56	56	aerial photography (transect) averaged	1.591	3.325	0.881	7.349	10.564	1.737	18.2528	3.25	12.722	7.569	762	27.2	11.0333	11.6
Evolution du trait de côte (histogrammes)	2016-01-29	MEEM	NA	Meem	NA	cerema_0297	mediterranean	NA	Europe	France	1000	schist	FALSE	FALSE	FALSE	FALSE	NA	NA	NA	31.5	57	31.5	104	strong	0.0294	NA	NA	0.001	0.143	0.0294	1952-01-01	2011-01-01	87.21	87.21	aerial photography (transect) averaged	0.904	2.313	0.692	4.787	6.921	1.249	3.83851	2.25	19.163	0.163	587	12.5	14.4833	14.8
Evolution du trait de côte (histogrammes)	2016-01-29	MEEM	NA	Meem	NA	cerema_0298	mediterranean	NA	Europe	France	1000	schist	FALSE	FALSE	FALSE	FALSE	NA	NA	NA	26.8	64	26.8	70	strong	0.0294	NA	NA	0.001	0.143	0.0294	1952-01-01	2011-01-01	87.21	87.21	aerial photography (transect) averaged	0.904	2.313	0.692	4.787	6.921	1.249	3.83851	2.25	19.163	0.163	587	12.5	14.4833	14.8
Evolution du trait de côte (histogrammes)	2016-01-29	MEEM	NA	Meem	NA	cerema_0299	NA	atlantic	Europe	France	600	gneiss	FALSE	FALSE	FALSE	FALSE	NA	NA	NA	11.7	24	11.7	168	strong	0.001	NA	NA	0.001	0.001	0.001	1952-01-01	2011-01-01	56	56	aerial photography (transect) averaged	1.591	3.325	0.881	7.349	10.564	1.737	18.2528	3.25	12.722	7.569	762	27.2	11.0333	11.6
Evolution du trait de côte (histogrammes)	2016-01-29	MEEM	NA	Meem	NA	cerema_0300	NA	atlantic	Europe	France	200	aeolianite	FALSE	FALSE	FALSE	FALSE	NA	NA	NA	43.2	64	43.2	265	weak	0.066	NA	NA	0.066	0.066	0.066	1952-01-01	2011-01-01	56	56	aerial photography (transect) averaged	1.591	3.325	0.881	7.349	10.564	1.737	18.2528	3.25	12.722	7.569	762	27.2	11.0333	11.6
Evolution du trait de côte (histogrammes)	2016-01-29	MEEM	NA	Meem	NA	cerema_0301	NA	atlantic	Europe	France	200	aeolianite	FALSE	FALSE	FALSE	FALSE	NA	NA	NA	27.3	43	27.3	271	weak	0.001	NA	NA	0.001	0.001	0.001	1952-01-01	2011-01-01	56	56	aerial photography (transect) averaged	1.591	3.325	0.881	7.349	10.564	1.737	18.2528	3.25	12.722	7.569	762	27.2	11.0333	11.6
Evolution du trait de côte (histogrammes)	2016-01-29	MEEM	NA	Meem	NA	cerema_0302	NA	atlantic	Europe	France	600	gneiss	FALSE	FALSE	FALSE	FALSE	NA	NA	NA	24.6	47	24.6	53	strong	0.001	NA	NA	0.001	0.001	0.001	1952-01-01	2011-01-01	56	56	aerial photography (transect) averaged	1.591	3.325	0.881	7.349	10.564	1.737	18.2528	3.25	12.722	7.569	762	27.2	11.0333	11.6
Evolution du trait de côte (histogrammes)	2016-01-29	MEEM	NA	Meem	NA	cerema_0303	NA	atlantic	Europe	France	5600	gneiss	FALSE	FALSE	FALSE	FALSE	NA	NA	NA	30.1	51	30.1	237	strong	0.001	NA	NA	0.001	0.001	0.001	1952-01-01	2011-01-01	56	56	aerial photography (transect) averaged	1.591	3.325	0.881	7.349	10.564	1.737	18.2528	3.25	12.722	7.569	762	27.2	11.0333	11.6
Evolution du trait de côte (histogrammes)	2016-01-29	MEEM	NA	Meem	NA	cerema_0304	NA	atlantic	Europe	France	200	fluvial deposits	FALSE	FALSE	FALSE	FALSE	NA	NA	NA	8.9	35	8.9	320	weak	0.001	NA	NA	0.001	0.001	0.001	1952-01-01	2011-01-01	56	56	aerial photography (transect) averaged	1.591	3.325	0.881	7.349	10.564	1.737	18.2528	3.25	12.722	7.569	762	27.2	11.0333	11.6
Evolution du trait de côte (histogrammes)	2016-01-29	MEEM	NA	Meem	NA	cerema_0305	NA	atlantic	Europe	France	600	sandstone	FALSE	FALSE	FALSE	FALSE	NA	NA	NA	30.5	57	30.5	302	strong	0.0236667	NA	NA	0.001	0.069	0.0236667	1952-01-01	2011-01-01	56	56	aerial photography (transect) averaged	1.591	3.325	0.881	7.349	10.564	1.737	18.2528	3.25	12.722	7.239	762	27.2	11.0333	11.6
Evolution du trait de côte (histogrammes)	2016-01-29	MEEM	NA	Meem	NA	cerema_0306	NA	atlantic	Europe	France	600	sandstone	FALSE	FALSE	FALSE	FALSE	NA	NA	NA	24.6	47	24.6	53	strong	0.0236667	NA	NA	0.001	0.069	0.0236667	1952-01-01	2011-01-01	56	56	aerial photography (transect) averaged	1.591	3.325	0.881	7.349	10.564	1.737	18.2528	3.25	12.722	7.239	762	27.2	11.0333	11.6
Evolution du trait de côte (histogrammes)	2016-01-29	MEEM	NA	Meem	NA	cerema_0307	NA	atlantic	Europe	France	200	aeolianite	FALSE	FALSE	FALSE	FALSE	NA	NA	NA	19.6	44	19.6	286	weak	0.319	NA	NA	0.319	0.319	0.319	1952-01-01	2011-01-01	56	56	aerial photography (transect) averaged	1.591	3.325	0.881	7.349	10.564	1.737	18.2528	3.25	12.722	7.239	762	27.2	11.0333	11.6
Evolution du trait de côte (histogrammes)	2016-01-29	MEEM	NA	Meem	NA	cerema_0308	NA	atlantic	Europe	France	400	sedimentaires	FALSE	FALSE	FALSE	FALSE	NA	NA	NA	23	43	23	137	strong	0.005	NA	NA	0.001	0.009	0.005	1952-01-01	2011-01-01	56	56	aerial photography (transect) averaged	1.591	3.325	0.881	7.349	10.564	1.737	18.2528	3.25	12.722	7.239	762	27.2	11.0333	11.6
Evolution du trait de côte (histogrammes)	2016-01-29	MEEM	NA	Meem	NA	cerema_0309	NA	atlantic	Europe	France	200	sedimentaires	FALSE	FALSE	FALSE	FALSE	NA	NA	NA	20.3	48	20.3	169	strong	0.001	NA	NA	0.001	0.001	0.001	1952-01-01	2011-01-01	56	56	aerial photography (transect) averaged	1.591	3.325	0.881	7.349	10.564	1.737	18.2528	3.25	12.722	7.239	762	27.2	11.0333	11.6
Evolution du trait de côte (histogrammes)	2016-01-29	MEEM	NA	Meem	NA	cerema_0310	NA	atlantic	Europe	France	200	aeolianite	FALSE	FALSE	FALSE	FALSE	NA	NA	NA	34	50	34	250	weak	0.001	NA	NA	0.001	0.001	0.001	1952-01-01	2011-01-01	56	56	aerial photography (transect) averaged	1.591	3.325	0.881	7.349	10.564	1.737	18.2528	3.25	12.722	7.239	762	27.2	11.0333	11.6
Evolution du trait de côte (histogrammes)	2016-01-29	MEEM	NA	Meem	NA	cerema_0311	NA	atlantic	Europe	France	200	intermediate rocks	FALSE	FALSE	FALSE	FALSE	NA	NA	NA	6.4	13	6.4	342	strong	0.001	NA	NA	0.001	0.001	0.001	1952-01-01	2011-01-01	57	57	aerial photography (transect) averaged	2.038	4.227	1.105	8.3	11.538	1.827	33.8258	4	9.782	4.848	891	16.9	11.325	9.8
Evolution du trait de côte (histogrammes)	2016-01-29	MEEM	NA	Meem	NA	cerema_0312	NA	atlantic	Europe	France	200	granite	FALSE	FALSE	FALSE	FALSE	NA	NA	NA	2	3	2	282	strong	0.001	NA	NA	0.001	0.001	0.001	1952-01-01	2011-01-01	57	57	aerial photography (transect) averaged	2.038	4.227	1.105	8.3	11.538	1.827	33.8258	4	9.782	4.848	891	16.9	11.325	9.8
Evolution du trait de côte (histogrammes)	2016-01-29	MEEM	NA	Meem	NA	cerema_0313	NA	atlantic	Europe	France	200	intermediate rocks	FALSE	FALSE	FALSE	FALSE	NA	NA	NA	6	8	6	285	strong	0.001	NA	NA	0.001	0.001	0.001	1952-01-01	2011-01-01	57	57	aerial photography (transect) averaged	2.038	4.227	1.105	8.3	11.538	1.827	33.8258	4	9.782	4.673	891	16.9	11.325	9.8
Evolution du trait de côte (histogrammes)	2016-01-29	MEEM	NA	Meem	NA	cerema_0314	NA	atlantic	Europe	France	200	undifferentiated recent marine deposits	FALSE	FALSE	FALSE	FALSE	NA	NA	NA	5.4	8	5.4	238	weak	0.001	NA	NA	0.001	0.001	0.001	1952-01-01	2011-01-01	57	57	aerial photography (transect) averaged	2.038	4.227	1.105	8.3	11.538	1.827	33.8258	4	9.782	4.673	891	16.9	11.325	9.8
Evolution du trait de côte (histogrammes)	2016-01-29	MEEM	NA	Meem	NA	cerema_0315	NA	atlantic	Europe	France	200	intermediate rocks	FALSE	FALSE	FALSE	FALSE	NA	NA	NA	4.4	6	4.4	130	strong	0.001	NA	NA	0.001	0.001	0.001	1952-01-01	2011-01-01	57	57	aerial photography (transect) averaged	2.038	4.227	1.105	8.3	11.538	1.827	33.8258	4	9.782	4.673	891	16.9	11.325	9.8
Evolution du trait de côte (histogrammes)	2016-01-29	MEEM	NA	Meem	NA	cerema_0316	NA	atlantic	Europe	France	200	aeolianite	FALSE	FALSE	FALSE	FALSE	NA	NA	NA	7.5	17	7.5	139	weak	0.001	NA	NA	0.001	0.001	0.001	1952-01-01	2011-01-01	59	59	aerial photography (transect) averaged	1.835	3.876	1.016	8.452	11.616	1.825	27.925	4.25	9.622	3.161	765	11.2	11.7	10.4
Evolution du trait de côte (histogrammes)	2016-01-29	MEEM	NA	Meem	NA	cerema_0317	NA	atlantic	Europe	France	1200	granite	FALSE	FALSE	FALSE	FALSE	NA	NA	NA	42.8	85	42.8	316	strong	0.001	NA	NA	0.001	0.001	0.001	1952-01-01	2011-01-01	57	57	aerial photography (transect) averaged	1.591	3.325	0.881	7.349	10.564	1.737	18.2528	3.25	12.722	5.634	754	15.7	11.225	10.2
Evolution du trait de côte (histogrammes)	2016-01-29	MEEM	NA	Meem	NA	cerema_0318	NA	atlantic	Europe	France	4600	intermediate rocks	FALSE	FALSE	FALSE	FALSE	NA	NA	NA	53.6	85	53.6	268	strong	0.001	NA	NA	0.001	0.001	0.001	1952-01-01	2011-01-01	57	57	aerial photography (transect) averaged	1.591	3.325	0.881	7.349	10.564	1.737	18.2528	3.25	12.722	5.634	754	15.7	11.225	10.2
Evolution du trait de côte (histogrammes)	2016-01-29	MEEM	NA	Meem	NA	cerema_0319	NA	atlantic	Europe	France	1400	granite	FALSE	FALSE	FALSE	FALSE	NA	NA	NA	6.6	14	6.6	320	strong	0.00742857	NA	NA	0.001	0.046	0.00742857	1952-01-01	2011-01-01	57	57	aerial photography (transect) averaged	1.591	3.325	0.881	7.349	10.564	1.737	18.2528	3.25	12.722	5.524	754	15.7	11.225	10.2
Evolution du trait de côte (histogrammes)	2016-01-29	MEEM	NA	Meem	NA	cerema_0320	mediterranean	NA	Europe	France	3000	schist	FALSE	FALSE	FALSE	FALSE	NA	NA	NA	43.5	123	43.5	69	strong	0.00566667	NA	NA	0.001	0.071	0.00566667	1952-01-01	2011-01-01	87.21	87.21	aerial photography (transect) averaged	0.904	2.313	0.692	4.787	6.921	1.249	3.83851	2.25	19.163	0.163	590	18	14.3333	15.6
Evolution du trait de côte (histogrammes)	2016-01-29	MEEM	NA	Meem	NA	cerema_0321	NA	atlantic	Europe	France	1400	metamorphic	FALSE	FALSE	FALSE	FALSE	NA	NA	NA	17.8	45	17.8	260	strong	0.001	NA	NA	0.001	0.001	0.001	1952-01-01	2011-01-01	57	57	aerial photography (transect) averaged	1.591	3.325	0.881	7.349	10.564	1.737	18.2528	3.25	12.722	5.524	754	15.7	11.225	10.2
Evolution du trait de côte (histogrammes)	2016-01-29	MEEM	NA	Meem	NA	cerema_0322	NA	atlantic	Europe	France	200	granite	FALSE	FALSE	FALSE	FALSE	NA	NA	NA	2.3	4	2.3	315	strong	0.001	NA	NA	0.001	0.001	0.001	1952-01-01	2011-01-01	57	57	aerial photography (transect) averaged	1.591	3.325	0.881	7.349	10.564	1.737	18.2528	3.25	12.722	5.379	754	15.7	11.225	10.2
Evolution du trait de côte (histogrammes)	2016-01-29	MEEM	NA	Meem	NA	cerema_0323	NA	atlantic	Europe	France	400	granite	FALSE	FALSE	FALSE	FALSE	NA	NA	NA	3.6	5	3.6	315	strong	0.001	NA	NA	0.001	0.001	0.001	1952-01-01	2011-01-01	57	57	aerial photography (transect) averaged	1.591	3.325	0.881	7.349	10.564	1.737	18.2528	3.25	12.722	5.379	754	15.7	11.225	10.2
Evolution du trait de côte (histogrammes)	2016-01-29	MEEM	NA	Meem	NA	cerema_0324	NA	atlantic	Europe	France	1200	granite	FALSE	FALSE	FALSE	FALSE	NA	NA	NA	3.8	6	3.8	339	strong	0.001	NA	NA	0.001	0.001	0.001	1952-01-01	2011-01-01	57	57	aerial photography (transect) averaged	1.591	3.325	0.881	7.349	10.564	1.737	18.2528	3.25	12.722	5.379	874	18.2	11.1167	10.1
Evolution du trait de côte (histogrammes)	2016-01-29	MEEM	NA	Meem	NA	cerema_0325	NA	atlantic	Europe	France	1200	granite	FALSE	FALSE	FALSE	FALSE	NA	NA	NA	3.5	8	3.5	38	strong	0.001	NA	NA	0.001	0.001	0.001	1952-01-01	2011-01-01	57	57	aerial photography (transect) averaged	1.591	3.325	0.881	7.349	10.564	1.737	18.2528	3.25	12.722	5.379	874	18.2	11.1167	10.1
Evolution du trait de côte (histogrammes)	2016-01-29	MEEM	NA	Meem	NA	cerema_0326	NA	atlantic	Europe	France	1200	granite	FALSE	FALSE	FALSE	FALSE	NA	NA	NA	5	8	5	304	strong	0.001	NA	NA	0.001	0.001	0.001	1952-01-01	2011-01-01	57	57	aerial photography (transect) averaged	1.591	3.325	0.881	7.349	10.564	1.737	18.2528	3.25	12.722	5.379	874	18.2	11.1167	10.1
Evolution du trait de côte (histogrammes)	2016-01-29	MEEM	NA	Meem	NA	cerema_0327	NA	atlantic	Europe	France	1200	granite	FALSE	FALSE	FALSE	FALSE	NA	NA	NA	3.7	8	3.7	245	strong	0.001	NA	NA	0.001	0.001	0.001	1952-01-01	2011-01-01	57	57	aerial photography (transect) averaged	1.591	3.325	0.881	7.349	10.564	1.737	18.2528	3.25	12.722	5.379	874	18.2	11.1167	10.1
Evolution du trait de côte (histogrammes)	2016-01-29	MEEM	NA	Meem	NA	cerema_0328	NA	atlantic	Europe	France	800	granite	FALSE	FALSE	FALSE	FALSE	NA	NA	NA	26	44	26	119	strong	0.001	NA	NA	0.001	0.001	0.001	1952-01-01	2011-01-01	57	57	aerial photography (transect) averaged	2.038	4.227	1.105	8.3	11.538	1.827	33.8258	4	9.782	4.186	864	14.6	11.4833	9.7
Evolution du trait de côte (histogrammes)	2016-01-29	MEEM	NA	Meem	NA	cerema_0329	NA	atlantic	Europe	France	1000	gneiss	FALSE	FALSE	FALSE	FALSE	NA	NA	NA	16.4	40	16.4	93	strong	0.001	NA	NA	0.001	0.001	0.001	1952-01-01	2011-01-01	57	57	aerial photography (transect) averaged	2.038	4.227	1.105	8.3	11.538	1.827	33.8258	4	9.782	4.186	864	14.6	11.4833	9.7
Evolution du trait de côte (histogrammes)	2016-01-29	MEEM	NA	Meem	NA	cerema_0330	NA	atlantic	Europe	France	1200	schist	FALSE	FALSE	FALSE	FALSE	NA	NA	NA	10.5	30	10.5	1	strong	0.001	NA	NA	0.001	0.001	0.001	1952-01-01	2011-01-01	57	57	aerial photography (transect) averaged	1.851	3.907	1.023	8.459	11.626	1.826	28.4377	4.25	9.595	4.186	864	14.6	11.4833	9.7
Evolution du trait de côte (histogrammes)	2016-01-29	MEEM	NA	Meem	NA	cerema_0331	NA	atlantic	Europe	France	400	schist	FALSE	FALSE	FALSE	FALSE	NA	NA	NA	15.2	36	15.2	2	strong	0.001	NA	NA	0.001	0.001	0.001	1952-01-01	2011-01-01	57	57	aerial photography (transect) averaged	1.851	3.907	1.023	8.459	11.626	1.826	28.4377	4.25	9.595	4.186	864	14.6	11.4833	9.7
Evolution du trait de côte (histogrammes)	2016-01-29	MEEM	NA	Meem	NA	cerema_0332	NA	atlantic	Europe	France	600	intermediate rocks	FALSE	FALSE	FALSE	FALSE	NA	NA	NA	19.3	36	19.3	111	strong	0.001	NA	NA	0.001	0.001	0.001	1952-01-01	2011-01-01	57	57	aerial photography (transect) averaged	1.851	3.907	1.023	8.459	11.626	1.826	28.4377	4.25	9.595	4.186	864	14.6	11.4833	9.7
Evolution du trait de côte (histogrammes)	2016-01-29	MEEM	NA	Meem	NA	cerema_0333	NA	atlantic	Europe	France	400	schist	FALSE	FALSE	FALSE	FALSE	NA	NA	NA	15.3	32	15.3	132	strong	0.001	NA	NA	0.001	0.001	0.001	1952-01-01	2011-01-01	57	57	aerial photography (transect) averaged	1.851	3.907	1.023	8.459	11.626	1.826	28.4377	4.25	9.595	4.186	864	14.6	11.4833	9.7
Evolution du trait de côte (histogrammes)	2016-01-29	MEEM	NA	Meem	NA	cerema_0334	NA	atlantic	Europe	France	1400	intermediate rocks	FALSE	FALSE	FALSE	FALSE	NA	NA	NA	32	64	32	113	strong	0.001	NA	NA	0.001	0.001	0.001	1952-01-01	2011-01-01	57	57	aerial photography (transect) averaged	1.851	3.907	1.023	8.459	11.626	1.826	28.4377	4.25	9.595	4.049	864	14.6	11.4833	9.7
Evolution du trait de côte (histogrammes)	2016-01-29	MEEM	NA	Meem	NA	cerema_0335	NA	atlantic	Europe	France	600	gneiss	FALSE	FALSE	FALSE	FALSE	NA	NA	NA	35.4	64	35.4	89	strong	0.001	NA	NA	0.001	0.001	0.001	1952-01-01	2011-01-01	57	57	aerial photography (transect) averaged	1.851	3.907	1.023	8.459	11.626	1.826	28.4377	4.25	9.595	4.049	864	14.6	11.4833	9.7
Evolution du trait de côte (histogrammes)	2016-01-29	MEEM	NA	Meem	NA	cerema_0336	NA	atlantic	Europe	France	2000	gneiss	FALSE	FALSE	FALSE	FALSE	NA	NA	NA	35.2	70	35.2	70	strong	0.001	NA	NA	0.001	0.001	0.001	1952-01-01	2011-01-01	57	57	aerial photography (transect) averaged	1.851	3.907	1.023	8.459	11.626	1.826	28.4377	4.25	9.595	NA	864	14.6	11.4833	9.7
Evolution du trait de côte (histogrammes)	2016-01-29	MEEM	NA	Meem	NA	cerema_0337	mediterranean	NA	Europe	France	1200	schist	FALSE	FALSE	FALSE	FALSE	NA	NA	NA	24	62	24	80	strong	0.001	NA	NA	0.001	0.001	0.001	1952-01-01	2011-01-01	87.21	87.21	aerial photography (transect) averaged	0.904	2.313	0.692	4.787	6.921	1.249	3.83851	2.25	19.163	0.163	590	18	14.3333	15.6
Evolution du trait de côte (histogrammes)	2016-01-29	MEEM	NA	Meem	NA	cerema_0338	NA	atlantic	Europe	France	1200	metamorphic	FALSE	FALSE	FALSE	FALSE	NA	NA	NA	34.6	69	34.6	77	strong	0.001	NA	NA	0.001	0.001	0.001	1952-01-01	2011-01-01	57	57	aerial photography (transect) averaged	1.851	3.907	1.023	8.459	11.626	1.826	28.4377	4.25	9.595	NA	864	14.6	11.4833	9.7
Evolution du trait de côte (histogrammes)	2016-01-29	MEEM	NA	Meem	NA	cerema_0339	NA	atlantic	Europe	France	200	granite	FALSE	FALSE	FALSE	FALSE	NA	NA	NA	17.8	26	17.8	59	strong	0.001	NA	NA	0.001	0.001	0.001	1952-01-01	2011-01-01	59	59	aerial photography (transect) averaged	1.851	3.907	1.023	8.459	11.626	1.826	28.4377	4.25	9.595	3.204	864	14.6	11.4833	9.7
Evolution du trait de côte (histogrammes)	2016-01-29	MEEM	NA	Meem	NA	cerema_0340	NA	atlantic	Europe	France	1800	granite	FALSE	FALSE	FALSE	FALSE	NA	NA	NA	11.5	27	11.5	102	strong	0.001	NA	NA	0.001	0.001	0.001	1952-01-01	2011-01-01	59	59	aerial photography (transect) averaged	1.851	3.907	1.023	8.459	11.626	1.826	28.4377	4.25	9.595	3.204	864	14.6	11.4833	9.7
Evolution du trait de côte (histogrammes)	2016-01-29	MEEM	NA	Meem	NA	cerema_0341	NA	atlantic	Europe	France	1600	granite	FALSE	FALSE	FALSE	FALSE	NA	NA	NA	29.6	56	29.6	120	strong	0.001	NA	NA	0.001	0.001	0.001	1952-01-01	2011-01-01	59	59	aerial photography (transect) averaged	1.851	3.907	1.023	8.459	11.626	1.826	28.4377	4.25	9.595	3.204	821	14.2	11.675	10
Evolution du trait de côte (histogrammes)	2016-01-29	MEEM	NA	Meem	NA	cerema_0342	NA	atlantic	Europe	France	200	granite	FALSE	FALSE	FALSE	FALSE	NA	NA	NA	3	3	3	167	strong	0.001	NA	NA	0.001	0.001	0.001	1952-01-01	2011-01-01	59	59	aerial photography (transect) averaged	1.851	3.907	1.023	8.459	11.626	1.826	28.4377	4.25	9.595	3.204	821	14.2	11.675	10
Evolution du trait de côte (histogrammes)	2016-01-29	MEEM	NA	Meem	NA	cerema_0343	NA	atlantic	Europe	France	1000	gneiss	FALSE	FALSE	FALSE	FALSE	NA	NA	NA	17.5	35	17.5	115	strong	0.001	NA	NA	0.001	0.001	0.001	1952-01-01	2011-01-01	59	59	aerial photography (transect) averaged	1.851	3.907	1.023	8.459	11.626	1.826	28.4377	4.25	9.595	3.204	821	14.2	11.675	10
Evolution du trait de côte (histogrammes)	2016-01-29	MEEM	NA	Meem	NA	cerema_0344	NA	atlantic	Europe	France	1600	granite	FALSE	FALSE	FALSE	FALSE	NA	NA	NA	11.5	22	11.5	120	strong	0.001	NA	NA	0.001	0.001	0.001	1952-01-01	2011-01-01	59	59	aerial photography (transect) averaged	1.851	3.907	1.023	8.459	11.626	1.826	28.4377	4.25	9.595	3.204	821	14.2	11.675	10
Evolution du trait de côte (histogrammes)	2016-01-29	MEEM	NA	Meem	NA	cerema_0345	NA	atlantic	Europe	France	1600	granite	FALSE	FALSE	FALSE	FALSE	NA	NA	NA	10	21	10	137	strong	0.001	NA	NA	0.001	0.001	0.001	1952-01-01	2011-01-01	59	59	aerial photography (transect) averaged	1.851	3.907	1.023	8.459	11.626	1.826	28.4377	4.25	9.595	3.204	821	14.2	11.675	10
Evolution du trait de côte (histogrammes)	2016-01-29	MEEM	NA	Meem	NA	cerema_0346	mediterranean	NA	Europe	France	1200	schist	FALSE	FALSE	FALSE	FALSE	NA	NA	NA	27.6	57	27.6	90	strong	0.001	NA	NA	0.001	0.001	0.001	1952-01-01	2011-01-01	87.21	87.21	aerial photography (transect) averaged	0.904	2.313	0.692	4.787	6.921	1.249	3.83851	2.25	19.163	0.166	590	18	14.3333	15.6
Evolution du trait de côte (histogrammes)	2016-01-29	MEEM	NA	Meem	NA	cerema_0347	NA	atlantic	Europe	France	200	schist	FALSE	FALSE	FALSE	FALSE	NA	NA	NA	2	2	2	163	strong	0.001	NA	NA	0.001	0.001	0.001	1952-01-01	2011-01-01	57	57	aerial photography (transect) averaged	2.246	4.644	1.211	8.48	11.718	1.835	41.9737	4	9.889	4.125	864	14.6	11.4833	9.7
Evolution du trait de côte (histogrammes)	2016-01-29	MEEM	NA	Meem	NA	cerema_0348	NA	atlantic	Europe	France	600	granite	FALSE	FALSE	FALSE	FALSE	NA	NA	NA	17.3	28	17.3	232	strong	0.001	NA	NA	0.001	0.001	0.001	1952-01-01	2011-01-01	57	57	aerial photography (transect) averaged	2.246	4.644	1.211	8.48	11.718	1.835	41.9737	4	9.889	4.125	864	14.6	11.4833	9.7
Evolution du trait de côte (histogrammes)	2016-01-29	MEEM	NA	Meem	NA	cerema_0349	NA	atlantic	Europe	France	600	granite	FALSE	FALSE	FALSE	FALSE	NA	NA	NA	3.5	7	3.5	255	strong	0.001	NA	NA	0.001	0.001	0.001	1952-01-01	2011-01-01	57	57	aerial photography (transect) averaged	2.246	4.644	1.211	8.48	11.718	1.835	41.9737	4	9.889	4.125	864	14.6	11.4833	9.7
Evolution du trait de côte (histogrammes)	2016-01-29	MEEM	NA	Meem	NA	cerema_0350	NA	atlantic	Europe	France	200	schist	FALSE	FALSE	FALSE	FALSE	NA	NA	NA	23.3	47	23.3	78	strong	0.001	NA	NA	0.001	0.001	0.001	1952-01-01	2011-01-01	57	57	aerial photography (transect) averaged	1.851	3.907	1.023	8.459	11.626	1.826	28.4377	4.25	9.595	4.049	864	14.6	11.4833	9.7
Evolution du trait de côte (histogrammes)	2016-01-29	MEEM	NA	Meem	NA	cerema_0351	NA	atlantic	Europe	France	1000	sandstone	FALSE	FALSE	FALSE	FALSE	NA	NA	NA	30	55	30	252	strong	0.0794	NA	NA	0.001	0.393	0.0794	1952-01-01	2011-01-01	57	57	aerial photography (transect) averaged	1.851	3.907	1.023	8.459	11.626	1.826	28.4377	4.25	9.595	4.049	864	14.6	11.4833	9.7
Evolution du trait de côte (histogrammes)	2016-01-29	MEEM	NA	Meem	NA	cerema_0352	NA	atlantic	Europe	France	800	schist	FALSE	FALSE	FALSE	FALSE	NA	NA	NA	33.6	55	33.6	268	strong	0.001	NA	NA	0.001	0.001	0.001	1952-01-01	2011-01-01	57	57	aerial photography (transect) averaged	1.851	3.907	1.023	8.459	11.626	1.826	28.4377	4.25	9.595	4.049	864	14.6	11.4833	9.7
Evolution du trait de côte (histogrammes)	2016-01-29	MEEM	NA	Meem	NA	cerema_0353	NA	atlantic	Europe	France	1200	sandstone	FALSE	FALSE	FALSE	FALSE	NA	NA	NA	17.4	41	17.4	200	strong	0.001	NA	NA	0.001	0.001	0.001	1952-01-01	2011-01-01	57	57	aerial photography (transect) averaged	1.851	3.907	1.023	8.459	11.626	1.826	28.4377	4.25	9.595	4.049	864	14.6	11.4833	9.7
Evolution du trait de côte (histogrammes)	2016-01-29	MEEM	NA	Meem	NA	cerema_0354	NA	atlantic	Europe	France	1200	sandstone	FALSE	FALSE	FALSE	FALSE	NA	NA	NA	47.6	86	47.6	80	strong	0.0128333	NA	NA	0.001	0.039	0.0128333	1952-01-01	2011-01-01	57	57	aerial photography (transect) averaged	1.851	3.907	1.023	8.459	11.626	1.826	28.4377	4.25	9.595	4.049	860	13.6	10.8583	10
Evolution du trait de côte (histogrammes)	2016-01-29	MEEM	NA	Meem	NA	cerema_0355	NA	atlantic	Europe	France	800	schist	FALSE	FALSE	FALSE	FALSE	NA	NA	NA	19.9	46	19.9	74	strong	0.001	NA	NA	0.001	0.001	0.001	1952-01-01	2011-01-01	57	57	aerial photography (transect) averaged	1.851	3.907	1.023	8.459	11.626	1.826	28.4377	4.25	9.595	4.049	860	13.6	10.8583	10
Evolution du trait de côte (histogrammes)	2016-01-29	MEEM	NA	Meem	NA	cerema_0356	NA	atlantic	Europe	France	3400	granite	FALSE	FALSE	FALSE	FALSE	NA	NA	NA	17.3	35	17.3	111	strong	0.002	NA	NA	0.001	0.018	0.002	1952-01-01	2011-01-01	59	59	aerial photography (transect) averaged	1.851	3.907	1.023	8.459	11.626	1.826	28.4377	4.25	9.595	3.242	864	14.6	11.4833	9.7
Evolution du trait de côte (histogrammes)	2016-01-29	MEEM	NA	Meem	NA	cerema_0357	NA	atlantic	Europe	France	200	loess and silts	FALSE	FALSE	FALSE	FALSE	NA	NA	NA	12.6	20	12.6	96	weak	0.001	NA	NA	0.001	0.001	0.001	1952-01-01	2011-01-01	59	59	aerial photography (transect) averaged	1.851	3.907	1.023	8.459	11.626	1.826	28.4377	4.25	9.595	3.242	864	14.6	11.4833	9.7
Evolution du trait de côte (histogrammes)	2016-01-29	MEEM	NA	Meem	NA	cerema_0358	NA	atlantic	Europe	France	200	aeolianite	FALSE	FALSE	FALSE	FALSE	NA	NA	NA	11	23	11	180	weak	0.128	NA	NA	0.128	0.128	0.128	1952-01-01	2011-01-01	59	59	aerial photography (transect) averaged	1.851	3.907	1.023	8.459	11.626	1.826	28.4377	4.25	9.595	3.242	864	14.6	11.4833	9.7
Evolution du trait de côte (histogrammes)	2016-01-29	MEEM	NA	Meem	NA	cerema_0359	mediterranean	NA	Europe	France	200	metamorphic	FALSE	FALSE	FALSE	FALSE	NA	NA	NA	19.8	39	19.8	89	strong	0.001	NA	NA	0.001	0.001	0.001	1952-01-01	2011-01-01	87.21	87.21	aerial photography (transect) averaged	0.904	2.313	0.692	4.787	6.921	1.249	3.83851	2.25	19.163	0.166	590	18	14.3333	15.6
Evolution du trait de côte (histogrammes)	2016-01-29	MEEM	NA	Meem	NA	cerema_0360	NA	atlantic	Europe	France	200	volcano-sedimentary	FALSE	FALSE	FALSE	FALSE	NA	NA	NA	19	34	19	343	strong	0.001	NA	NA	0.001	0.001	0.001	1952-01-01	2011-01-01	59	59	aerial photography (transect) averaged	1.811	3.873	1.037	8.162	11.545	1.923	26.2661	4	9.969	3.344	754	15.7	11.9417	10.7
Evolution du trait de côte (histogrammes)	2016-01-29	MEEM	NA	Meem	NA	cerema_0361	NA	atlantic	Europe	France	200	volcano-sedimentary	FALSE	FALSE	FALSE	FALSE	NA	NA	NA	17.8	25	17.8	292	strong	0.001	NA	NA	0.001	0.001	0.001	1952-01-01	2011-01-01	59	59	aerial photography (transect) averaged	1.811	3.873	1.037	8.162	11.545	1.923	26.2661	4	9.969	3.344	754	15.7	11.9417	10.7
Evolution du trait de côte (histogrammes)	2016-01-29	MEEM	NA	Meem	NA	cerema_0362	NA	atlantic	Europe	France	600	volcano-sedimentary	FALSE	FALSE	FALSE	FALSE	NA	NA	NA	27.6	42	27.6	312	strong	0.001	NA	NA	0.001	0.001	0.001	1952-01-01	2011-01-01	59	59	aerial photography (transect) averaged	1.811	3.873	1.037	8.162	11.545	1.923	26.2661	4	9.969	3.344	754	15.7	11.9417	10.7
Evolution du trait de côte (histogrammes)	2016-01-29	MEEM	NA	Meem	NA	cerema_0363	NA	atlantic	Europe	France	3000	volcano-sedimentary	FALSE	FALSE	FALSE	FALSE	NA	NA	NA	21.2	38	21.2	170	strong	0.001	NA	NA	0.001	0.001	0.001	1952-01-01	2011-01-01	59	59	aerial photography (transect) averaged	1.811	3.873	1.037	8.162	11.545	1.923	26.2661	4	9.969	3.344	754	15.7	11.9417	10.7
Evolution du trait de côte (histogrammes)	2016-01-29	MEEM	NA	Meem	NA	cerema_0364	NA	atlantic	Europe	France	1200	volcano-sedimentary	FALSE	FALSE	FALSE	FALSE	NA	NA	NA	24.2	40	24.2	293	strong	0.001	NA	NA	0.001	0.001	0.001	1952-01-01	2011-01-01	59	59	aerial photography (transect) averaged	1.811	3.873	1.037	8.162	11.545	1.923	26.2661	4	9.969	3.344	754	15.7	11.9417	10.7
Evolution du trait de côte (histogrammes)	2016-01-29	MEEM	NA	Meem	NA	cerema_0365	NA	atlantic	Europe	France	600	metamorphic	FALSE	FALSE	FALSE	FALSE	NA	NA	NA	28.7	41	28.7	270	strong	0.001	NA	NA	0.001	0.001	0.001	1952-01-01	2011-01-01	59	59	aerial photography (transect) averaged	1.811	3.873	1.037	8.162	11.545	1.923	26.2661	4	9.969	3.344	754	15.7	11.9417	10.7
Evolution du trait de côte (histogrammes)	2016-01-29	MEEM	NA	Meem	NA	cerema_0366	NA	atlantic	Europe	France	200	volcano-sedimentary	FALSE	FALSE	FALSE	FALSE	NA	NA	NA	23.6	41	23.6	245	strong	0.001	NA	NA	0.001	0.001	0.001	1952-01-01	2011-01-01	59	59	aerial photography (transect) averaged	1.811	3.873	1.037	8.162	11.545	1.923	26.2661	4	9.969	3.184	754	15.7	11.9417	10.7
Evolution du trait de côte (histogrammes)	2016-01-29	MEEM	NA	Meem	NA	cerema_0367	NA	atlantic	Europe	France	200	volcano-sedimentary	FALSE	FALSE	FALSE	FALSE	NA	NA	NA	27.8	40	27.8	330	strong	0.001	NA	NA	0.001	0.001	0.001	1952-01-01	2011-01-01	59	59	aerial photography (transect) averaged	1.811	3.873	1.037	8.162	11.545	1.923	26.2661	4	9.969	3.184	754	15.7	11.9417	10.7
Evolution du trait de côte (histogrammes)	2016-01-29	MEEM	NA	Meem	NA	cerema_0368	mediterranean	NA	Europe	France	1000	granite	FALSE	FALSE	FALSE	FALSE	NA	NA	NA	26.5	65	26.5	151	strong	0.001	NA	NA	0.001	0.001	0.001	1952-01-01	2011-01-01	87.21	87.21	aerial photography (transect) averaged	0.904	2.313	0.692	4.787	6.921	1.249	3.83851	2.25	19.163	0.166	590	18	14.3333	15.6
Evolution du trait de côte (histogrammes)	2016-01-29	MEEM	NA	Meem	NA	cerema_0369	NA	atlantic	Europe	France	800	metamorphic	FALSE	FALSE	FALSE	FALSE	NA	NA	NA	27.8	46	27.8	315	strong	0.001	NA	NA	0.001	0.001	0.001	1952-01-01	2011-01-01	59	59	aerial photography (transect) averaged	1.811	3.873	1.037	8.162	11.545	1.923	26.2661	4	9.969	3.184	754	15.7	11.9417	10.7
Evolution du trait de côte (histogrammes)	2016-01-29	MEEM	NA	Meem	NA	cerema_0370	NA	atlantic	Europe	France	1200	volcano-sedimentary	FALSE	FALSE	FALSE	FALSE	NA	NA	NA	29.3	46	29.3	279	strong	0.001	NA	NA	0.001	0.001	0.001	1952-01-01	2011-01-01	59	59	aerial photography (transect) averaged	1.811	3.873	1.037	8.162	11.545	1.923	26.2661	4	9.969	3.184	754	15.7	11.9417	10.7
Evolution du trait de côte (histogrammes)	2016-01-29	MEEM	NA	Meem	NA	cerema_0371	NA	atlantic	Europe	France	800	metamorphic	FALSE	FALSE	FALSE	FALSE	NA	NA	NA	21.8	36	21.8	286	strong	0.001	NA	NA	0.001	0.001	0.001	1952-01-01	2011-01-01	59	59	aerial photography (transect) averaged	1.811	3.873	1.037	8.162	11.545	1.923	26.2661	4	9.969	3.184	754	15.7	11.9417	10.7
Evolution du trait de côte (histogrammes)	2016-01-29	MEEM	NA	Meem	NA	cerema_0372	NA	atlantic	Europe	France	7200	volcano-sedimentary	FALSE	FALSE	FALSE	FALSE	NA	NA	NA	16	32	16	255	strong	0.00216667	NA	NA	0.001	0.043	0.00216667	1952-01-01	2011-01-01	59	59	aerial photography (transect) averaged	1.811	3.873	1.037	8.162	11.545	1.923	26.2661	4	9.969	3.184	754	15.7	11.9417	10.7
Evolution du trait de côte (histogrammes)	2016-01-29	MEEM	NA	Meem	NA	cerema_0373	NA	atlantic	Europe	France	11400	volcano-sedimentary	FALSE	FALSE	FALSE	FALSE	NA	NA	NA	22.8	33	22.8	171	strong	0.001	NA	NA	0.001	0.001	0.001	1952-01-01	2011-01-01	59	59	aerial photography (transect) averaged	1.811	3.873	1.037	8.162	11.545	1.923	26.2661	4	9.969	3.184	754	15.7	11.9417	10.7
Evolution du trait de côte (histogrammes)	2016-01-29	MEEM	NA	Meem	NA	cerema_0374	mediterranean	NA	Europe	France	200	fluvial deposits	FALSE	FALSE	FALSE	FALSE	NA	NA	NA	37.7	94	37.7	149	weak	0.073	NA	NA	0.073	0.073	0.073	1952-01-01	2011-01-01	87.21	87.21	aerial photography (transect) averaged	0.904	2.313	0.692	4.787	6.921	1.249	3.83851	2.25	19.163	0.166	590	18	14.3333	15.6
Evolution du trait de côte (histogrammes)	2016-01-29	MEEM	NA	Meem	NA	cerema_0375	NA	atlantic	Europe	France	400	volcano-sedimentary	FALSE	FALSE	FALSE	FALSE	NA	NA	NA	18.9	34	18.9	205	strong	0.001	NA	NA	0.001	0.001	0.001	1952-01-01	2011-01-01	59	59	aerial photography (transect) averaged	1.811	3.873	1.037	8.162	11.545	1.923	26.2661	4	9.969	3.184	754	15.7	11.9417	10.7
Evolution du trait de côte (histogrammes)	2016-01-29	MEEM	NA	Meem	NA	cerema_0376	NA	atlantic	Europe	France	5400	volcano-sedimentary	FALSE	FALSE	FALSE	FALSE	NA	NA	NA	16.5	35	16.5	141	strong	0.001	NA	NA	0.001	0.001	0.001	1952-01-01	2011-01-01	59	59	aerial photography (transect) averaged	1.811	3.873	1.037	8.162	11.545	1.923	26.2661	4	9.969	3.167	754	15.7	11.9417	10.7
Evolution du trait de côte (histogrammes)	2016-01-29	MEEM	NA	Meem	NA	cerema_0377	NA	atlantic	Europe	France	3600	volcano-sedimentary	FALSE	FALSE	FALSE	FALSE	NA	NA	NA	17.3	36	17.3	115	strong	0.001	NA	NA	0.001	0.001	0.001	1952-01-01	2011-01-01	59	59	aerial photography (transect) averaged	1.811	3.873	1.037	8.162	11.545	1.923	26.2661	4	9.969	3.167	754	15.7	11.9417	10.7
Evolution du trait de côte (histogrammes)	2016-01-29	MEEM	NA	Meem	NA	cerema_0378	NA	atlantic	Europe	France	800	metamorphic	FALSE	FALSE	FALSE	FALSE	NA	NA	NA	18.8	44	18.8	60	strong	0.001	NA	NA	0.001	0.001	0.001	1952-01-01	2011-01-01	59	59	aerial photography (transect) averaged	1.811	3.873	1.037	8.162	11.545	1.923	26.2661	4	9.969	3.167	754	15.7	11.9417	10.7
Evolution du trait de côte (histogrammes)	2016-01-29	MEEM	NA	Meem	NA	cerema_0379	NA	atlantic	Europe	France	200	metamorphic	FALSE	FALSE	FALSE	FALSE	NA	NA	NA	16.6	38	16.6	223	strong	0.001	NA	NA	0.001	0.001	0.001	1952-01-01	2011-01-01	59	59	aerial photography (transect) averaged	1.811	3.873	1.037	8.162	11.545	1.923	26.2661	4	9.969	3.167	754	15.7	11.9417	10.7
Evolution du trait de côte (histogrammes)	2016-01-29	MEEM	NA	Meem	NA	cerema_0380	mediterranean	NA	Europe	France	200	undifferentiated recent marine deposits	FALSE	FALSE	FALSE	FALSE	NA	NA	NA	12	30	12	1	weak	0.001	NA	NA	0.001	0.001	0.001	1952-01-01	2011-01-01	87.21	87.21	aerial photography (transect) averaged	0.904	2.313	0.692	4.787	6.921	1.249	3.83851	2.25	19.163	0.166	590	18	14.3333	15.6
Evolution du trait de côte (histogrammes)	2016-01-29	MEEM	NA	Meem	NA	cerema_0381	NA	atlantic	Europe	France	2200	metamorphic	FALSE	FALSE	FALSE	FALSE	NA	NA	NA	23	51	23	82	strong	0.001	NA	NA	0.001	0.001	0.001	1952-01-01	2011-01-01	59	59	aerial photography (transect) averaged	1.811	3.873	1.037	8.162	11.545	1.923	26.2661	4	9.969	3.167	754	15.7	11.9417	10.7
Evolution du trait de côte (histogrammes)	2016-01-29	MEEM	NA	Meem	NA	cerema_0382	NA	atlantic	Europe	France	1400	volcano-sedimentary	FALSE	FALSE	FALSE	FALSE	NA	NA	NA	22.2	49	22.2	80	strong	0.001	NA	NA	0.001	0.001	0.001	1952-01-01	2011-01-01	59	59	aerial photography (transect) averaged	1.811	3.873	1.037	8.162	11.545	1.923	26.2661	4	9.969	3.213	754	15.7	11.9417	10.7
Evolution du trait de côte (histogrammes)	2016-01-29	MEEM	NA	Meem	NA	cerema_0383	NA	atlantic	Europe	France	8200	volcano-sedimentary	FALSE	FALSE	FALSE	FALSE	NA	NA	NA	30.7	59	30.7	105	strong	0.001	NA	NA	0.001	0.001	0.001	1952-01-01	2011-01-01	59	59	aerial photography (transect) averaged	1.811	3.873	1.037	8.162	11.545	1.923	26.2661	4	9.969	3.213	754	15.7	11.9417	10.7
Evolution du trait de côte (histogrammes)	2016-01-29	MEEM	NA	Meem	NA	cerema_0384	NA	atlantic	Europe	France	800	metamorphic	FALSE	FALSE	FALSE	FALSE	NA	NA	NA	26.8	56	26.8	106	strong	0.001	NA	NA	0.001	0.001	0.001	1952-01-01	2011-01-01	59	59	aerial photography (transect) averaged	1.811	3.873	1.037	8.162	11.545	1.923	26.2661	4	9.969	3.213	754	15.7	11.9417	10.7
Evolution du trait de côte (histogrammes)	2016-01-29	MEEM	NA	Meem	NA	cerema_0385	NA	atlantic	Europe	France	5400	volcano-sedimentary	FALSE	FALSE	FALSE	FALSE	NA	NA	NA	25.5	52	25.5	61	strong	0.001	NA	NA	0.001	0.001	0.001	1952-01-01	2011-01-01	59	59	aerial photography (transect) averaged	1.811	3.873	1.037	8.162	11.545	1.923	26.2661	4	9.969	3.213	754	15.7	11.9417	10.7
Evolution du trait de côte (histogrammes)	2016-01-29	MEEM	NA	Meem	NA	cerema_0386	NA	atlantic	Europe	France	1800	metamorphic	FALSE	FALSE	FALSE	FALSE	NA	NA	NA	25.2	39	25.2	280	strong	0.001	NA	NA	0.001	0.001	0.001	1952-01-01	2011-01-01	59	59	aerial photography (transect) averaged	1.811	3.873	1.037	8.162	11.545	1.923	26.2661	4	9.969	3.344	754	15.7	11.9417	10.7
Evolution du trait de côte (histogrammes)	2016-01-29	MEEM	NA	Meem	NA	cerema_0387	NA	atlantic	Europe	France	800	volcano-sedimentary	FALSE	FALSE	FALSE	FALSE	NA	NA	NA	26.9	37	26.9	263	strong	0.001	NA	NA	0.001	0.001	0.001	1952-01-01	2011-01-01	59	59	aerial photography (transect) averaged	1.811	3.873	1.037	8.162	11.545	1.923	26.2661	4	9.969	3.344	754	15.7	11.9417	10.7
Evolution du trait de côte (histogrammes)	2016-01-29	MEEM	NA	Meem	NA	cerema_0388	mediterranean	NA	Europe	France	200	sedimentaires	FALSE	FALSE	FALSE	FALSE	NA	NA	NA	80.8	170	80.8	91	strong	0.001	NA	NA	0.001	0.001	0.001	1952-01-01	2011-01-01	87.21	87.21	aerial photography (transect) averaged	0.904	2.313	0.692	4.787	6.921	1.249	3.83851	2.25	19.163	0.192	701	27.1	12.8167	14.9
Evolution du trait de côte (histogrammes)	2016-01-29	MEEM	NA	Meem	NA	cerema_0389	mediterranean	NA	Europe	France	1000	granite	FALSE	FALSE	FALSE	FALSE	NA	NA	NA	18.7	30	18.7	342	strong	0.001	NA	NA	0.001	0.001	0.001	1952-01-01	2011-01-01	87.21	87.21	aerial photography (transect) averaged	0.904	2.313	0.692	4.787	6.921	1.249	3.83851	2.25	19.163	0.166	590	18	14.3333	15.6
Evolution du trait de côte (histogrammes)	2016-01-29	MEEM	NA	Meem	NA	cerema_0390	mediterranean	NA	Europe	France	1000	granite	FALSE	FALSE	FALSE	FALSE	NA	NA	NA	48.5	119	48.5	21	strong	0.001	NA	NA	0.001	0.001	0.001	1952-01-01	2011-01-01	87.21	87.21	aerial photography (transect) averaged	0.904	2.313	0.692	4.787	6.921	1.249	3.83851	2.25	19.163	0.166	590	18	14.3333	15.6
Evolution du trait de côte (histogrammes)	2016-01-29	MEEM	NA	Meem	NA	cerema_0391	NA	atlantic	Europe	France	3000	volcano-sedimentary	FALSE	FALSE	FALSE	FALSE	NA	NA	NA	23.4	45	23.4	292	strong	0.00353333	NA	NA	0.001	0.039	0.00353333	1952-01-01	2011-01-01	59	59	aerial photography (transect) averaged	1.811	3.873	1.037	8.162	11.545	1.923	26.2661	4	9.969	3.344	754	15.7	11.9417	10.7
Evolution du trait de côte (histogrammes)	2016-01-29	MEEM	NA	Meem	NA	cerema_0392	NA	atlantic	Europe	France	800	metamorphic	FALSE	FALSE	FALSE	FALSE	NA	NA	NA	22.9	43	22.9	291	strong	0.001	NA	NA	0.001	0.001	0.001	1952-01-01	2011-01-01	59	59	aerial photography (transect) averaged	1.811	3.873	1.037	8.162	11.545	1.923	26.2661	4	9.969	3.344	754	15.7	11.9417	10.7
Evolution du trait de côte (histogrammes)	2016-01-29	MEEM	NA	Meem	NA	cerema_0393	NA	atlantic	Europe	France	1200	metamorphic	FALSE	FALSE	FALSE	FALSE	NA	NA	NA	20.1	42	20.1	3	strong	0.001	NA	NA	0.001	0.001	0.001	1952-01-01	2011-01-01	59	59	aerial photography (transect) averaged	1.811	3.873	1.037	8.162	11.545	1.923	26.2661	4	9.969	3.344	754	15.7	11.9417	10.7
Evolution du trait de côte (histogrammes)	2016-01-29	MEEM	NA	Meem	NA	cerema_0394	NA	atlantic	Europe	France	3200	granite	FALSE	FALSE	FALSE	FALSE	NA	NA	NA	18.3	31	18.3	284	strong	0.001	NA	NA	0.001	0.001	0.001	1952-01-01	2011-01-01	59	59	aerial photography (transect) averaged	1.811	3.873	1.037	8.162	11.545	1.923	26.2661	4	9.969	3.402	754	15.7	11.9417	10.7
Evolution du trait de côte (histogrammes)	2016-01-29	MEEM	NA	Meem	NA	cerema_0395	NA	atlantic	Europe	France	200	metamorphic	FALSE	FALSE	FALSE	FALSE	NA	NA	NA	24.3	27	24.3	291	strong	0.001	NA	NA	0.001	0.001	0.001	1952-01-01	2011-01-01	59	59	aerial photography (transect) averaged	1.811	3.873	1.037	8.162	11.545	1.923	26.2661	4	9.969	3.402	754	15.7	11.9417	10.7
Evolution du trait de côte (histogrammes)	2016-01-29	MEEM	NA	Meem	NA	cerema_0396	NA	atlantic	Europe	France	1200	granite	FALSE	FALSE	FALSE	FALSE	NA	NA	NA	18	30	18	98	strong	0.001	NA	NA	0.001	0.001	0.001	1952-01-01	2011-01-01	59	59	aerial photography (transect) averaged	1.811	3.873	1.037	8.162	11.545	1.923	26.2661	4	9.969	3.402	754	15.7	11.9417	10.7
Evolution du trait de côte (histogrammes)	2016-01-29	MEEM	NA	Meem	NA	cerema_0397	NA	atlantic	Europe	France	1000	granite	FALSE	FALSE	FALSE	FALSE	NA	NA	NA	5.8	11	5.8	140	strong	0.001	NA	NA	0.001	0.001	0.001	1952-01-01	2011-01-01	59	59	aerial photography (transect) averaged	1.811	3.873	1.037	8.162	11.545	1.923	26.2661	4	9.969	3.402	754	15.7	11.9417	10.7
Evolution du trait de côte (histogrammes)	2016-01-29	MEEM	NA	Meem	NA	cerema_0398	NA	atlantic	Europe	France	200	granite	FALSE	FALSE	FALSE	FALSE	NA	NA	NA	5.9	10	5.9	307	strong	0.001	NA	NA	0.001	0.001	0.001	1952-01-01	2011-01-01	59	59	aerial photography (transect) averaged	1.811	3.873	1.037	8.162	11.545	1.923	26.2661	4	9.969	3.402	754	15.7	11.9417	10.7
Evolution du trait de côte (histogrammes)	2016-01-29	MEEM	NA	Meem	NA	cerema_0399	NA	atlantic	Europe	France	400	granite	FALSE	FALSE	FALSE	FALSE	NA	NA	NA	5.9	11	5.9	11	strong	0.001	NA	NA	0.001	0.001	0.001	1952-01-01	2011-01-01	59	59	aerial photography (transect) averaged	1.811	3.873	1.037	8.162	11.545	1.923	26.2661	4	9.969	3.402	754	15.7	11.9417	10.7
Evolution du trait de côte (histogrammes)	2016-01-29	MEEM	NA	Meem	NA	cerema_0400	NA	atlantic	Europe	France	800	granite	FALSE	FALSE	FALSE	FALSE	NA	NA	NA	8.2	17	8.2	256	strong	0.001	NA	NA	0.001	0.001	0.001	1952-01-01	2011-01-01	59	59	aerial photography (transect) averaged	1.811	3.873	1.037	8.162	11.545	1.923	26.2661	4	9.969	3.402	754	15.7	11.9417	10.7
Evolution du trait de côte (histogrammes)	2016-01-29	MEEM	NA	Meem	NA	cerema_0401	NA	atlantic	Europe	France	200	granite	FALSE	FALSE	FALSE	FALSE	NA	NA	NA	10.4	17	10.4	45	strong	0.001	NA	NA	0.001	0.001	0.001	1952-01-01	2011-01-01	59	59	aerial photography (transect) averaged	1.811	3.873	1.037	8.162	11.545	1.923	26.2661	4	9.969	3.458	754	15.7	11.9417	10.7
Evolution du trait de côte (histogrammes)	2016-01-29	MEEM	NA	Meem	NA	cerema_0402	mediterranean	NA	Europe	France	4600	granite	FALSE	FALSE	FALSE	FALSE	NA	NA	NA	42.6	119	42.6	70	strong	0.001	NA	NA	0.001	0.001	0.001	1952-01-01	2011-01-01	87.21	87.21	aerial photography (transect) averaged	0.904	2.313	0.692	4.787	6.921	1.249	3.83851	2.25	19.163	0.166	590	18	14.3333	15.6
Evolution du trait de côte (histogrammes)	2016-01-29	MEEM	NA	Meem	NA	cerema_0403	NA	atlantic	Europe	France	400	granite	FALSE	FALSE	FALSE	FALSE	NA	NA	NA	6	12	6	3	strong	0.001	NA	NA	0.001	0.001	0.001	1952-01-01	2011-01-01	59	59	aerial photography (transect) averaged	1.811	3.873	1.037	8.162	11.545	1.923	26.2661	4	9.969	3.458	754	15.7	11.9417	10.7
Evolution du trait de côte (histogrammes)	2016-01-29	MEEM	NA	Meem	NA	cerema_0404	NA	atlantic	Europe	France	400	granite	FALSE	FALSE	FALSE	FALSE	NA	NA	NA	8.1	14	8.1	111	strong	0.001	NA	NA	0.001	0.001	0.001	1952-01-01	2011-01-01	59	59	aerial photography (transect) averaged	1.811	3.873	1.037	8.162	11.545	1.923	26.2661	4	9.969	3.458	754	15.7	11.9417	10.7
Evolution du trait de côte (histogrammes)	2016-01-29	MEEM	NA	Meem	NA	cerema_0405	NA	atlantic	Europe	France	600	granite	FALSE	FALSE	FALSE	FALSE	NA	NA	NA	4.8	11	4.8	325	strong	0.001	NA	NA	0.001	0.001	0.001	1952-01-01	2011-01-01	59	59	aerial photography (transect) averaged	1.811	3.873	1.037	8.162	11.545	1.923	26.2661	4	9.969	3.458	754	15.7	11.9417	10.7
Evolution du trait de côte (histogrammes)	2016-01-29	MEEM	NA	Meem	NA	cerema_0406	NA	atlantic	Europe	France	800	metamorphic	FALSE	FALSE	FALSE	FALSE	NA	NA	NA	5.3	9	5.3	111	strong	0.001	NA	NA	0.001	0.001	0.001	1952-01-01	2011-01-01	59	59	aerial photography (transect) averaged	1.811	3.873	1.037	8.162	11.545	1.923	26.2661	4	9.969	3.724	690	18.3	11.4917	11.7
Evolution du trait de côte (histogrammes)	2016-01-29	MEEM	NA	Meem	NA	cerema_0407	NA	atlantic	Europe	France	7000	metamorphic	FALSE	FALSE	FALSE	FALSE	NA	NA	NA	32.4	68	32.4	180	strong	0.001	NA	NA	0.001	0.001	0.001	1952-01-01	2011-01-01	57	57	aerial photography (transect) averaged	1.851	3.907	1.023	8.459	11.626	1.826	28.4377	4.25	9.595	4.049	864	14.6	11.4833	9.7
Evolution du trait de côte (histogrammes)	2016-01-29	MEEM	NA	Meem	NA	cerema_0408	NA	atlantic	Europe	France	3600	metamorphic	FALSE	FALSE	FALSE	FALSE	NA	NA	NA	45.2	76	45.2	253	strong	0.001	NA	NA	0.001	0.001	0.001	1952-01-01	2011-01-01	57	57	aerial photography (transect) averaged	1.851	3.907	1.023	8.459	11.626	1.826	28.4377	4.25	9.595	NA	864	14.6	11.4833	9.7
Evolution du trait de côte (histogrammes)	2016-01-29	MEEM	NA	Meem	NA	cerema_0409	mediterranean	NA	Europe	France	200	undifferentiated recent marine deposits	FALSE	FALSE	FALSE	FALSE	NA	NA	NA	20	43	20	2	weak	0.064	NA	NA	0.064	0.064	0.064	1952-01-01	2011-01-01	87.21	87.21	aerial photography (transect) averaged	0.904	2.313	0.692	4.787	6.921	1.249	3.83851	2.25	19.163	0.17	590	18	14.3333	15.6
Evolution du trait de côte (histogrammes)	2016-01-29	MEEM	NA	Meem	NA	cerema_0410	english channel	atlantic	Europe	France	2800	marl and consolidated clay	FALSE	FALSE	FALSE	FALSE	NA	NA	NA	38.3	81	38.3	236	medium	0.146286	NA	NA	0.009	0.292	0.146286	1952-01-01	2011-01-01	58	58	aerial photography (transect) averaged	1.264	2.952	0.835	6.101	8.658	1.397	9.56439	2.5	15.181	5.317	564	29.5	10.5167	12.8
Evolution du trait de côte (histogrammes)	2016-01-29	MEEM	NA	Meem	NA	cerema_0411	english channel	atlantic	Europe	France	2800	marl and consolidated clay	FALSE	FALSE	FALSE	FALSE	NA	NA	NA	45.9	105	45.9	239	medium	0.146286	NA	NA	0.009	0.292	0.146286	1952-01-01	2011-01-01	58	58	aerial photography (transect) averaged	1.264	2.952	0.835	6.101	8.658	1.397	9.56439	2.5	15.181	5.317	564	29.5	10.5167	12.8
Evolution du trait de côte (histogrammes)	2016-01-29	MEEM	NA	Meem	NA	cerema_0412	english channel	atlantic	Europe	France	200	marl and consolidated clay	FALSE	FALSE	FALSE	FALSE	NA	NA	NA	47.1	97	47.1	229	medium	0.128	NA	NA	0.128	0.128	0.128	1952-01-01	2011-01-01	58	58	aerial photography (transect) averaged	1.264	2.952	0.835	6.101	8.658	1.397	9.56439	2.5	15.181	5.317	564	29.5	10.5167	12.8
Evolution du trait de côte (histogrammes)	2016-01-29	MEEM	NA	Meem	NA	cerema_0413	english channel	atlantic	Europe	France	800	marl and consolidated clay	FALSE	FALSE	FALSE	FALSE	NA	NA	NA	29.9	51	29.9	273	medium	0.09525	NA	NA	0.022	0.171	0.09525	1952-01-01	2011-01-01	58	58	aerial photography (transect) averaged	1.264	2.952	0.835	6.101	8.658	1.397	9.56439	2.5	15.181	4.852	582	27.2	10.6667	12.1
Evolution du trait de côte (histogrammes)	2016-01-29	MEEM	NA	Meem	NA	cerema_0414	english channel	atlantic	Europe	France	5000	limestone	FALSE	FALSE	FALSE	FALSE	NA	NA	NA	39.4	70	39.4	275	strong	0.00844	NA	NA	0.001	0.187	0.00844	1952-01-01	2011-01-01	60.8	60.8	aerial photography (transect) averaged	1.264	2.952	0.835	6.101	8.658	1.397	9.56439	2.5	15.181	4.852	582	27.2	10.6667	12.1
Evolution du trait de côte (histogrammes)	2016-01-29	MEEM	NA	Meem	NA	cerema_0415	english channel	atlantic	Europe	France	5000	limestone	FALSE	FALSE	FALSE	FALSE	NA	NA	NA	53.7	72	53.7	274	strong	0.00844	NA	NA	0.001	0.187	0.00844	1952-01-01	2011-01-01	60.8	60.8	aerial photography (transect) averaged	1.264	2.952	0.835	6.101	8.658	1.397	9.56439	2.5	15.181	4.758	582	27.2	10.6667	12.1
Evolution du trait de côte (histogrammes)	2016-01-29	MEEM	NA	Meem	NA	cerema_0416	english channel	atlantic	Europe	France	5000	limestone	FALSE	FALSE	FALSE	FALSE	NA	NA	NA	53.6	72	53.6	270	strong	0.00844	NA	NA	0.001	0.187	0.00844	1952-01-01	2011-01-01	60.8	60.8	aerial photography (transect) averaged	1.264	2.952	0.835	6.101	8.658	1.397	9.56439	2.5	15.181	4.758	582	27.2	10.6667	12.1
Evolution du trait de côte (histogrammes)	2016-01-29	MEEM	NA	Meem	NA	cerema_0417	english channel	atlantic	Europe	France	400	marl and consolidated clay	FALSE	FALSE	FALSE	FALSE	NA	NA	NA	20.5	41	20.5	280	medium	0.001	NA	NA	0.001	0.001	0.001	1952-01-01	2011-01-01	65	65	aerial photography (transect) averaged	1.264	2.952	0.835	6.101	8.658	1.397	9.56439	2.5	15.181	4.852	582	27.2	10.6667	12.1
Evolution du trait de côte (histogrammes)	2016-01-29	MEEM	NA	Meem	NA	cerema_0418	english channel	atlantic	Europe	France	1200	marl and consolidated clay	FALSE	FALSE	FALSE	FALSE	NA	NA	NA	25.5	58	25.5	275	medium	0.0305	NA	NA	0.001	0.178	0.0305	1952-01-01	2011-01-01	58	58	aerial photography (transect) averaged	1.264	2.952	0.835	6.101	8.658	1.397	9.56439	2.5	15.181	4.758	582	27.2	10.6667	12.1
Evolution du trait de côte (histogrammes)	2016-01-29	MEEM	NA	Meem	NA	cerema_0419	mediterranean	NA	Europe	France	400	gneiss	FALSE	FALSE	FALSE	FALSE	NA	NA	NA	18.1	49	18.1	307	strong	0.106	NA	NA	0.001	0.211	0.106	1952-01-01	2011-01-01	87.21	87.21	aerial photography (transect) averaged	0.904	2.313	0.692	4.787	6.921	1.249	3.83851	2.25	19.163	0.17	590	18	14.3333	15.6
Evolution du trait de côte (histogrammes)	2016-01-29	MEEM	NA	Meem	NA	cerema_0420	english channel	atlantic	Europe	France	5000	marl and consolidated clay	FALSE	FALSE	FALSE	FALSE	NA	NA	NA	45.7	66	45.7	276	medium	0.03672	NA	NA	0.001	0.466	0.03672	1952-01-01	2011-01-01	58	58	aerial photography (transect) averaged	1.264	2.952	0.835	6.101	8.658	1.397	9.56439	2.5	15.181	4.758	582	27.2	10.6667	12.1
Evolution du trait de côte (histogrammes)	2016-01-29	MEEM	NA	Meem	NA	cerema_0421	english channel	atlantic	Europe	France	400	chalk	FALSE	FALSE	FALSE	FALSE	NA	NA	NA	51.1	102	51.1	253	weak	0.027	NA	NA	0.023	0.031	0.027	1952-01-01	2011-01-01	58	58	aerial photography (transect) averaged	1.264	2.952	0.835	6.101	8.658	1.397	9.56439	2.5	15.181	5.317	564	29.5	10.5167	12.8
Evolution du trait de côte (histogrammes)	2016-01-29	MEEM	NA	Meem	NA	cerema_0422	english channel	atlantic	Europe	France	200	aeolianite	FALSE	FALSE	FALSE	FALSE	NA	NA	NA	18.5	43	18.5	256	weak	0.287	NA	NA	0.287	0.287	0.287	1952-01-01	2011-01-01	58	58	aerial photography (transect) averaged	1.264	2.952	0.835	6.101	8.658	1.397	9.56439	2.5	15.181	5.317	564	29.5	10.5167	12.8
Evolution du trait de côte (histogrammes)	2016-01-29	MEEM	NA	Meem	NA	cerema_0423	english channel	atlantic	Europe	France	200	chalk	FALSE	FALSE	FALSE	FALSE	NA	NA	NA	33.5	61	33.5	266	weak	0.362	NA	NA	0.362	0.362	0.362	1952-01-01	2011-01-01	58	58	aerial photography (transect) averaged	1.264	2.952	0.835	6.101	8.658	1.397	9.56439	2.5	15.181	5.317	564	29.5	10.5167	12.8
Evolution du trait de côte (histogrammes)	2016-01-29	MEEM	NA	Meem	NA	cerema_0424	english channel	atlantic	Europe	France	4400	granite	FALSE	FALSE	FALSE	FALSE	NA	NA	NA	58.4	111	58.4	282	strong	0.00477273	NA	NA	0.001	0.073	0.00477273	1952-01-01	2011-01-01	63	63	aerial photography (transect) averaged	1.391	3.094	0.852	6.483	9.187	1.468	12.3081	2.625	14.807	3.868	766	37.6	10.4667	11.9
Evolution du trait de côte (histogrammes)	2016-01-29	MEEM	NA	Meem	NA	cerema_0425	english channel	atlantic	Europe	France	800	granite	FALSE	FALSE	FALSE	FALSE	NA	NA	NA	51.1	92	51.1	297	strong	0.04925	NA	NA	0.001	0.194	0.04925	1952-01-01	2011-01-01	63	63	aerial photography (transect) averaged	1.391	3.094	0.852	6.483	9.187	1.468	12.3081	2.625	14.807	4.126	766	37.6	10.4667	11.9
Evolution du trait de côte (histogrammes)	2016-01-29	MEEM	NA	Meem	NA	cerema_0426	english channel	atlantic	Europe	France	600	metamorphic	FALSE	FALSE	FALSE	FALSE	NA	NA	NA	44.5	84	44.5	325	strong	0.001	NA	NA	0.001	0.001	0.001	1952-01-01	2011-01-01	63	63	aerial photography (transect) averaged	1.391	3.094	0.852	6.483	9.187	1.468	12.3081	2.625	14.807	4.126	766	37.6	10.4667	11.9
Evolution du trait de côte (histogrammes)	2016-01-29	MEEM	NA	Meem	NA	cerema_0427	mediterranean	NA	Europe	France	2200	gneiss	FALSE	FALSE	FALSE	FALSE	NA	NA	NA	25	80	25	54	strong	0.0190909	NA	NA	0.001	0.2	0.0190909	1952-01-01	2011-01-01	87.21	87.21	aerial photography (transect) averaged	0.904	2.313	0.692	4.787	6.921	1.249	3.83851	2.25	19.163	0.17	590	18	14.3333	15.6
Evolution du trait de côte (histogrammes)	2016-01-29	MEEM	NA	Meem	NA	cerema_0428	english channel	atlantic	Europe	France	400	granite	FALSE	FALSE	FALSE	FALSE	NA	NA	NA	35.2	83	35.2	319	strong	0.001	NA	NA	0.001	0.001	0.001	1952-01-01	2011-01-01	63	63	aerial photography (transect) averaged	1.391	3.094	0.852	6.483	9.187	1.468	12.3081	2.625	14.807	4.126	766	37.6	10.4667	11.9
Evolution du trait de côte (histogrammes)	2016-01-29	MEEM	NA	Meem	NA	cerema_0429	english channel	atlantic	Europe	France	5400	granite	FALSE	FALSE	FALSE	FALSE	NA	NA	NA	12.3	63	12.3	270	strong	0.0499259	NA	NA	0.001	0.36	0.0499259	1952-01-01	2011-01-01	63	63	aerial photography (transect) averaged	1.391	3.094	0.852	6.483	9.187	1.468	12.3081	2.625	14.807	4.126	766	37.6	10.4667	11.9
Evolution du trait de côte (histogrammes)	2016-01-29	MEEM	NA	Meem	NA	cerema_0430	english channel	atlantic	Europe	France	400	granite	FALSE	FALSE	FALSE	FALSE	NA	NA	NA	30.3	73	30.3	305	strong	0.001	NA	NA	0.001	0.001	0.001	1952-01-01	2011-01-01	63	63	aerial photography (transect) averaged	1.391	3.094	0.852	6.483	9.187	1.468	12.3081	2.625	14.807	4.126	766	37.6	10.4667	11.9
Evolution du trait de côte (histogrammes)	2016-01-29	MEEM	NA	Meem	NA	cerema_0431	english channel	atlantic	Europe	France	200	granite	FALSE	FALSE	FALSE	FALSE	NA	NA	NA	26.5	47	26.5	175	strong	0.001	NA	NA	0.001	0.001	0.001	1952-01-01	2011-01-01	63	63	aerial photography (transect) averaged	1.391	3.094	0.852	6.483	9.187	1.468	12.3081	2.625	14.807	4.325	766	37.6	10.4667	11.9
Evolution du trait de côte (histogrammes)	2016-01-29	MEEM	NA	Meem	NA	cerema_0432	english channel	atlantic	Europe	France	1200	metamorphic	FALSE	FALSE	FALSE	FALSE	NA	NA	NA	50.2	98	50.2	160	strong	0.001	NA	NA	0.001	0.001	0.001	1952-01-01	2011-01-01	63	63	aerial photography (transect) averaged	1.391	3.094	0.852	6.483	9.187	1.468	12.3081	2.625	14.807	4.325	766	37.6	10.4667	11.9
Evolution du trait de côte (histogrammes)	2016-01-29	MEEM	NA	Meem	NA	cerema_0433	english channel	atlantic	Europe	France	200	fluvial deposits	FALSE	FALSE	FALSE	FALSE	NA	NA	NA	36.8	84	36.8	209	weak	0.001	NA	NA	0.001	0.001	0.001	1952-01-01	2011-01-01	63	63	aerial photography (transect) averaged	1.391	3.094	0.852	6.483	9.187	1.468	12.3081	2.625	14.807	5.337	766	37.6	10.4667	11.9
Evolution du trait de côte (histogrammes)	2016-01-29	MEEM	NA	Meem	NA	cerema_0434	english channel	atlantic	Europe	France	200	marl and consolidated clay	FALSE	FALSE	FALSE	FALSE	NA	NA	NA	15.7	21	15.7	195	medium	0.118	NA	NA	0.118	0.118	0.118	1952-01-01	2011-01-01	75	75	aerial photography (transect) averaged	0.749	1.74	0.499	4.381	6.001	0.936	2.41156	2	21.114	5.705	579	43.5	9.94167	12.9
Evolution du trait de côte (histogrammes)	2016-01-29	MEEM	NA	Meem	NA	cerema_0435	mediterranean	NA	Europe	France	200	fluvial deposits	FALSE	FALSE	FALSE	FALSE	NA	NA	NA	13.8	24	13.8	306	weak	0.001	NA	NA	0.001	0.001	0.001	1952-01-01	2011-01-01	87.21	87.21	aerial photography (transect) averaged	0.904	2.313	0.692	4.787	6.921	1.249	3.83851	2.25	19.163	0.17	590	18	14.3333	15.6
Evolution du trait de côte (histogrammes)	2016-01-29	MEEM	NA	Meem	NA	cerema_0436	english channel	atlantic	Europe	France	200	marl and consolidated clay	FALSE	FALSE	FALSE	FALSE	NA	NA	NA	19.4	32	19.4	195	medium	0.046	NA	NA	0.046	0.046	0.046	1952-01-01	2011-01-01	75	75	aerial photography (transect) averaged	0.749	1.74	0.499	4.381	6.001	0.936	2.41156	2	21.114	6.115	579	43.5	9.94167	12.9
Evolution du trait de côte (histogrammes)	2016-01-29	MEEM	NA	Meem	NA	cerema_0437	english channel	atlantic	Europe	France	600	granite	FALSE	FALSE	FALSE	FALSE	NA	NA	NA	1.3	2	1.3	198	strong	0.152333	NA	NA	0.096	0.202	0.152333	1952-01-01	2011-01-01	63	63	aerial photography (transect) averaged	1.264	2.952	0.835	6.101	8.658	1.397	9.56439	2.5	15.181	3.861	722	38.2	10.5583	12.5
Evolution du trait de côte (histogrammes)	2016-01-29	MEEM	NA	Meem	NA	cerema_0438	english channel	atlantic	Europe	France	200	granite	FALSE	FALSE	FALSE	FALSE	NA	NA	NA	6.2	10	6.2	258	strong	0.003	NA	NA	0.003	0.003	0.003	1952-01-01	2011-01-01	63	63	aerial photography (transect) averaged	1.264	2.952	0.835	6.101	8.658	1.397	9.56439	2.5	15.181	3.861	722	38.2	10.5583	12.5
Evolution du trait de côte (histogrammes)	2016-01-29	MEEM	NA	Meem	NA	cerema_0439	english channel	atlantic	Europe	France	4200	granite	FALSE	FALSE	FALSE	FALSE	NA	NA	NA	29.3	94	29.3	231	strong	0.0305238	NA	NA	0.001	0.145	0.0305238	1952-01-01	2011-01-01	63	63	aerial photography (transect) averaged	1.264	2.952	0.835	6.101	8.658	1.397	9.56439	2.5	15.181	3.804	722	38.2	10.5583	12.5
Evolution du trait de côte (histogrammes)	2016-01-29	MEEM	NA	Meem	NA	cerema_0440	english channel	atlantic	Europe	France	4200	granite	FALSE	FALSE	FALSE	FALSE	NA	NA	NA	7.7	18	7.7	185	strong	0.0305238	NA	NA	0.001	0.145	0.0305238	1952-01-01	2011-01-01	63	63	aerial photography (transect) averaged	1.264	2.952	0.835	6.101	8.658	1.397	9.56439	2.5	15.181	3.804	722	38.2	10.5583	12.5
Evolution du trait de côte (histogrammes)	2016-01-29	MEEM	NA	Meem	NA	cerema_0441	english channel	atlantic	Europe	France	4200	granite	FALSE	FALSE	FALSE	FALSE	NA	NA	NA	10.8	18	10.8	287	strong	0.0305238	NA	NA	0.001	0.145	0.0305238	1952-01-01	2011-01-01	63	63	aerial photography (transect) averaged	1.264	2.952	0.835	6.101	8.658	1.397	9.56439	2.5	15.181	3.804	722	38.2	10.5583	12.5
Evolution du trait de côte (histogrammes)	2016-01-29	MEEM	NA	Meem	NA	cerema_0442	english channel	atlantic	Europe	France	200	metamorphic	FALSE	FALSE	FALSE	FALSE	NA	NA	NA	62.4	93	62.4	240	strong	0.001	NA	NA	0.001	0.001	0.001	1952-01-01	2011-01-01	63	63	aerial photography (transect) averaged	1.264	2.952	0.835	6.101	8.658	1.397	9.56439	2.5	15.181	3.804	722	38.2	10.5583	12.5
Evolution du trait de côte (histogrammes)	2016-01-29	MEEM	NA	Meem	NA	cerema_0443	NA	atlantic	Europe	France	200	granite	FALSE	FALSE	FALSE	FALSE	NA	NA	NA	5.3	11	5.3	50	strong	0.001	NA	NA	0.001	0.001	0.001	1952-01-01	2011-01-01	59	59	aerial photography (transect) averaged	1.835	3.876	1.016	8.452	11.616	1.825	27.925	4.25	9.622	3.208	730	14.4	11.5833	11
Evolution du trait de côte (histogrammes)	2016-01-29	MEEM	NA	Meem	NA	cerema_0444	NA	atlantic	Europe	France	600	granite	FALSE	FALSE	FALSE	FALSE	NA	NA	NA	4.4	7	4.4	44	strong	0.0523333	NA	NA	0.001	0.096	0.0523333	1952-01-01	2011-01-01	59	59	aerial photography (transect) averaged	1.835	3.876	1.016	8.452	11.616	1.825	27.925	4.25	9.622	3.208	730	14.4	11.5833	11
Evolution du trait de côte (histogrammes)	2016-01-29	MEEM	NA	Meem	NA	cerema_0445	mediterranean	NA	Europe	France	400	sedimentaires	FALSE	FALSE	FALSE	FALSE	NA	NA	NA	61.7	129	61.7	89	strong	0.001	NA	NA	0.001	0.001	0.001	1952-01-01	2011-01-01	87.21	87.21	aerial photography (transect) averaged	0.904	2.313	0.692	4.787	6.921	1.249	3.83851	2.25	19.163	0.192	701	27.1	12.8167	14.9
Evolution du trait de côte (histogrammes)	2016-01-29	MEEM	NA	Meem	NA	cerema_0446	NA	atlantic	Europe	France	800	granite	FALSE	FALSE	FALSE	FALSE	NA	NA	NA	6.1	12	6.1	106	strong	0.039	NA	NA	0.001	0.153	0.039	1952-01-01	2011-01-01	59	59	aerial photography (transect) averaged	1.811	3.873	1.037	8.162	11.545	1.923	26.2661	4	9.969	3.263	730	14.4	11.5833	11
Evolution du trait de côte (histogrammes)	2016-01-29	MEEM	NA	Meem	NA	cerema_0447	NA	atlantic	Europe	France	8000	granite	FALSE	FALSE	FALSE	FALSE	NA	NA	NA	12.4	26	12.4	149	strong	0.00995	NA	NA	0.001	0.359	0.00995	1952-01-01	2011-01-01	59	59	aerial photography (transect) averaged	1.811	3.873	1.037	8.162	11.545	1.923	26.2661	4	9.969	3.243	730	14.4	11.5833	11
Evolution du trait de côte (histogrammes)	2016-01-29	MEEM	NA	Meem	NA	cerema_0448	NA	atlantic	Europe	France	600	schist	FALSE	FALSE	FALSE	FALSE	NA	NA	NA	13.5	26	13.5	84	strong	0.001	NA	NA	0.001	0.001	0.001	1952-01-01	2011-01-01	59	59	aerial photography (transect) averaged	1.835	3.876	1.016	8.452	11.616	1.825	27.925	4.25	9.622	3.161	765	11.2	11.7	10.4
Evolution du trait de côte (histogrammes)	2016-01-29	MEEM	NA	Meem	NA	cerema_0449	mediterranean	NA	Europe	France	200		FALSE	FALSE	FALSE	FALSE	NA	NA	NA	43.8	169	43.8	93	weak	0.344	NA	NA	0.344	0.344	0.344	1952-01-01	2011-01-01	87.21	87.21	aerial photography (transect) averaged	0.904	2.313	0.692	4.787	6.921	1.249	3.83851	2.25	19.163	0.192	701	27.1	12.8167	14.9
Evolution du trait de côte (histogrammes)	2016-01-29	MEEM	NA	Meem	NA	cerema_0450	NA	atlantic	Europe	France	200	gneiss	FALSE	FALSE	FALSE	FALSE	NA	NA	NA	3.4	6	3.4	279	strong	0.001	NA	NA	0.001	0.001	0.001	1952-01-01	2011-01-01	59	59	aerial photography (transect) averaged	1.811	3.873	1.037	8.162	11.545	1.923	26.2661	4	9.969	3.586	690	18.3	11.4917	11.7
Evolution du trait de côte (histogrammes)	2016-01-29	MEEM	NA	Meem	NA	cerema_0451	NA	atlantic	Europe	France	800	schist	FALSE	FALSE	FALSE	FALSE	NA	NA	NA	11.6	22	11.6	131	strong	0.001	NA	NA	0.001	0.001	0.001	1952-01-01	2011-01-01	59	59	aerial photography (transect) averaged	1.835	3.876	1.016	8.452	11.616	1.825	27.925	4.25	9.622	3.161	765	11.2	11.7	10.4
Evolution du trait de côte (histogrammes)	2016-01-29	MEEM	NA	Meem	NA	cerema_0452	NA	atlantic	Europe	France	400	schist	FALSE	FALSE	FALSE	FALSE	NA	NA	NA	8.3	18	8.3	146	strong	0.001	NA	NA	0.001	0.001	0.001	1952-01-01	2011-01-01	59	59	aerial photography (transect) averaged	1.835	3.876	1.016	8.452	11.616	1.825	27.925	4.25	9.622	3.161	765	11.2	11.7	10.4
Evolution du trait de côte (histogrammes)	2016-01-29	MEEM	NA	Meem	NA	cerema_0453	NA	atlantic	Europe	France	200	aeolianite	FALSE	FALSE	FALSE	FALSE	NA	NA	NA	13.2	20	13.2	122	weak	0.001	NA	NA	0.001	0.001	0.001	1952-01-01	2011-01-01	59	59	aerial photography (transect) averaged	1.835	3.876	1.016	8.452	11.616	1.825	27.925	4.25	9.622	3.161	765	11.2	11.7	10.4
Evolution du trait de côte (histogrammes)	2016-01-29	MEEM	NA	Meem	NA	cerema_0454	NA	atlantic	Europe	France	1400	granite	FALSE	FALSE	FALSE	FALSE	NA	NA	NA	7.3	14	7.3	137	strong	0.0642857	NA	NA	0.001	0.179	0.0642857	1952-01-01	2011-01-01	59	59	aerial photography (transect) averaged	1.835	3.876	1.016	8.452	11.616	1.825	27.925	4.25	9.622	3.161	730	14.4	11.5833	11
Evolution du trait de côte (histogrammes)	2016-01-29	MEEM	NA	Meem	NA	cerema_0455	mediterranean	NA	Europe	France	6400	limestone	FALSE	FALSE	FALSE	FALSE	NA	NA	NA	43.9	161	43.9	90	strong	0.006	NA	NA	0.001	0.157	0.006	1952-01-01	2011-01-01	84.21	84.21	aerial photography (transect) averaged	1.067	2.823	0.846	4.824	7.032	1.266	5.38888	2.25	19.35	0.173	601	19.7	13.8917	16.1
Evolution du trait de côte (histogrammes)	2016-01-29	MEEM	NA	Meem	NA	cerema_0456	NA	atlantic	Europe	France	200	granite	FALSE	FALSE	FALSE	FALSE	NA	NA	NA	6.2	10	6.2	159	strong	0.001	NA	NA	0.001	0.001	0.001	1952-01-01	2011-01-01	59	59	aerial photography (transect) averaged	1.835	3.876	1.016	8.452	11.616	1.825	27.925	4.25	9.622	3.174	730	14.4	11.5833	11
Evolution du trait de côte (histogrammes)	2016-01-29	MEEM	NA	Meem	NA	cerema_0457	NA	atlantic	Europe	France	800	granite	FALSE	FALSE	FALSE	FALSE	NA	NA	NA	6.8	14	6.8	110	strong	0.001	NA	NA	0.001	0.001	0.001	1952-01-01	2011-01-01	59	59	aerial photography (transect) averaged	1.835	3.876	1.016	8.452	11.616	1.825	27.925	4.25	9.622	3.174	730	14.4	11.5833	11
Evolution du trait de côte (histogrammes)	2016-01-29	MEEM	NA	Meem	NA	cerema_0458	NA	atlantic	Europe	France	200	granite	FALSE	FALSE	FALSE	FALSE	NA	NA	NA	9	11	9	124	strong	0.001	NA	NA	0.001	0.001	0.001	1952-01-01	2011-01-01	59	59	aerial photography (transect) averaged	1.835	3.876	1.016	8.452	11.616	1.825	27.925	4.25	9.622	3.174	730	14.4	11.5833	11
Evolution du trait de côte (histogrammes)	2016-01-29	MEEM	NA	Meem	NA	cerema_0459	NA	atlantic	Europe	France	200	granite	FALSE	FALSE	FALSE	FALSE	NA	NA	NA	9.6	15	9.6	169	strong	0.001	NA	NA	0.001	0.001	0.001	1952-01-01	2011-01-01	59	59	aerial photography (transect) averaged	1.835	3.876	1.016	8.452	11.616	1.825	27.925	4.25	9.622	3.174	730	14.4	11.5833	11
Evolution du trait de côte (histogrammes)	2016-01-29	MEEM	NA	Meem	NA	cerema_0460	NA	atlantic	Europe	France	1400	granite	FALSE	FALSE	FALSE	FALSE	NA	NA	NA	8.4	15	8.4	123	strong	0.001	NA	NA	0.001	0.001	0.001	1952-01-01	2011-01-01	59	59	aerial photography (transect) averaged	1.835	3.876	1.016	8.452	11.616	1.825	27.925	4.25	9.622	3.174	730	14.4	11.5833	11
Evolution du trait de côte (histogrammes)	2016-01-29	MEEM	NA	Meem	NA	cerema_0461	NA	atlantic	Europe	France	800	granite	FALSE	FALSE	FALSE	FALSE	NA	NA	NA	8.2	13	8.2	92	strong	0.001	NA	NA	0.001	0.001	0.001	1952-01-01	2011-01-01	59	59	aerial photography (transect) averaged	1.811	3.873	1.037	8.162	11.545	1.923	26.2661	4	9.969	3.541	754	15.7	11.9417	10.7
Evolution du trait de côte (histogrammes)	2016-01-29	MEEM	NA	Meem	NA	cerema_0462	mediterranean	NA	Europe	France	200	limestone	FALSE	FALSE	FALSE	FALSE	NA	NA	NA	152.7	232	152.7	89	strong	0.001	NA	NA	0.001	0.001	0.001	1952-01-01	2011-01-01	87.21	87.21	aerial photography (transect) averaged	0.904	2.313	0.692	4.787	6.921	1.249	3.83851	2.25	19.163	0.192	701	27.1	12.8167	14.9
Evolution du trait de côte (histogrammes)	2016-01-29	MEEM	NA	Meem	NA	cerema_0463	mediterranean	NA	Europe	France	2200	metamorphic	FALSE	FALSE	FALSE	FALSE	NA	NA	NA	11.4	41	11.4	19	strong	0.0178182	NA	NA	0.001	0.108	0.0178182	1952-01-01	2011-01-01	87.21	87.21	aerial photography (transect) averaged	1.054	2.707	0.803	4.882	7.108	1.271	5.32159	2.25	18.709	0.162	587	12.5	14.4833	14.8
Evolution du trait de côte (histogrammes)	2016-01-29	MEEM	NA	Meem	NA	cerema_0464	NA	atlantic	Europe	France	200	granite	FALSE	FALSE	FALSE	FALSE	NA	NA	NA	2.2	4	2.2	60	strong	0.004	NA	NA	0.004	0.004	0.004	1952-01-01	2011-01-01	59	59	aerial photography (transect) averaged	1.811	3.873	1.037	8.162	11.545	1.923	26.2661	4	9.969	3.586	690	18.3	11.4917	11.7
Evolution du trait de côte (histogrammes)	2016-01-29	MEEM	NA	Meem	NA	cerema_0465	NA	atlantic	Europe	France	200	granite	FALSE	FALSE	FALSE	FALSE	NA	NA	NA	8	11	8	252	strong	0.001	NA	NA	0.001	0.001	0.001	1952-01-01	2011-01-01	59	59	aerial photography (transect) averaged	1.811	3.873	1.037	8.162	11.545	1.923	26.2661	4	9.969	3.586	690	18.3	11.4917	11.7
Evolution du trait de côte (histogrammes)	2016-01-29	MEEM	NA	Meem	NA	cerema_0466	NA	atlantic	Europe	France	200	granite	FALSE	FALSE	FALSE	FALSE	NA	NA	NA	6	11	6	341	strong	0.001	NA	NA	0.001	0.001	0.001	1952-01-01	2011-01-01	59	59	aerial photography (transect) averaged	1.811	3.873	1.037	8.162	11.545	1.923	26.2661	4	9.969	3.586	690	18.3	11.4917	11.7
Evolution du trait de côte (histogrammes)	2016-01-29	MEEM	NA	Meem	NA	cerema_0467	NA	atlantic	Europe	France	1200	gneiss	FALSE	FALSE	FALSE	FALSE	NA	NA	NA	5.7	12	5.7	308	strong	0.001	NA	NA	0.001	0.001	0.001	1952-01-01	2011-01-01	59	59	aerial photography (transect) averaged	1.811	3.873	1.037	8.162	11.545	1.923	26.2661	4	9.969	3.586	690	18.3	11.4917	11.7
Evolution du trait de côte (histogrammes)	2016-01-29	MEEM	NA	Meem	NA	cerema_0468	mediterranean	NA	Europe	France	200	fluvial deposits	FALSE	FALSE	FALSE	FALSE	NA	NA	NA	13.3	31	13.3	253	weak	0.107	NA	NA	0.107	0.107	0.107	1952-01-01	2011-01-01	87.21	87.21	aerial photography (transect) averaged	0.904	2.313	0.692	4.787	6.921	1.249	3.83851	2.25	19.163	0.17	590	18	14.3333	15.6
Evolution du trait de côte (histogrammes)	2016-01-29	MEEM	NA	Meem	NA	cerema_0469	NA	atlantic	Europe	France	1000	gneiss	FALSE	FALSE	FALSE	FALSE	NA	NA	NA	4.8	11	4.8	228	strong	0.001	NA	NA	0.001	0.001	0.001	1952-01-01	2011-01-01	59	59	aerial photography (transect) averaged	1.811	3.873	1.037	8.162	11.545	1.923	26.2661	4	9.969	3.586	690	18.3	11.4917	11.7
Evolution du trait de côte (histogrammes)	2016-01-29	MEEM	NA	Meem	NA	cerema_0470	NA	atlantic	Europe	France	400	gneiss	FALSE	FALSE	FALSE	FALSE	NA	NA	NA	7	11	7	293	strong	0.001	NA	NA	0.001	0.001	0.001	1952-01-01	2011-01-01	59	59	aerial photography (transect) averaged	1.811	3.873	1.037	8.162	11.545	1.923	26.2661	4	9.969	3.586	690	18.3	11.4917	11.7
Evolution du trait de côte (histogrammes)	2016-01-29	MEEM	NA	Meem	NA	cerema_0471	NA	atlantic	Europe	France	1200	granite	FALSE	FALSE	FALSE	FALSE	NA	NA	NA	6.9	14	6.9	308	strong	0.001	NA	NA	0.001	0.001	0.001	1952-01-01	2011-01-01	59	59	aerial photography (transect) averaged	1.811	3.873	1.037	8.162	11.545	1.923	26.2661	4	9.969	3.586	690	18.3	11.4917	11.7
Evolution du trait de côte (histogrammes)	2016-01-29	MEEM	NA	Meem	NA	cerema_0472	NA	atlantic	Europe	France	800	granite	FALSE	FALSE	FALSE	FALSE	NA	NA	NA	9.8	18	9.8	180	strong	0.001	NA	NA	0.001	0.001	0.001	1952-01-01	2011-01-01	59	59	aerial photography (transect) averaged	1.811	3.873	1.037	8.162	11.545	1.923	26.2661	4	9.969	3.586	690	18.3	11.4917	11.7
Evolution du trait de côte (histogrammes)	2016-01-29	MEEM	NA	Meem	NA	cerema_0473	NA	atlantic	Europe	France	200	granite	FALSE	FALSE	FALSE	FALSE	NA	NA	NA	3.5	10	3.5	284	strong	0.001	NA	NA	0.001	0.001	0.001	1952-01-01	2011-01-01	59	59	aerial photography (transect) averaged	1.811	3.873	1.037	8.162	11.545	1.923	26.2661	4	9.969	3.586	690	18.3	11.4917	11.7
Evolution du trait de côte (histogrammes)	2016-01-29	MEEM	NA	Meem	NA	cerema_0474	mediterranean	NA	Europe	France	600	gneiss	FALSE	FALSE	FALSE	FALSE	NA	NA	NA	37.7	85	37.7	260	strong	0.0193333	NA	NA	0.001	0.042	0.0193333	1952-01-01	2011-01-01	87.21	87.21	aerial photography (transect) averaged	0.904	2.313	0.692	4.787	6.921	1.249	3.83851	2.25	19.163	0.17	590	18	14.3333	15.6
Evolution du trait de côte (histogrammes)	2016-01-29	MEEM	NA	Meem	NA	cerema_0475	NA	atlantic	Europe	France	600	granite	FALSE	FALSE	FALSE	FALSE	NA	NA	NA	5.2	12	5.2	136	strong	0.001	NA	NA	0.001	0.001	0.001	1952-01-01	2011-01-01	59	59	aerial photography (transect) averaged	1.811	3.873	1.037	8.162	11.545	1.923	26.2661	4	9.969	3.586	690	18.3	11.4917	11.7
Evolution du trait de côte (histogrammes)	2016-01-29	MEEM	NA	Meem	NA	cerema_0476	NA	atlantic	Europe	France	600	schist	FALSE	FALSE	FALSE	FALSE	NA	NA	NA	9	23	9	85	strong	0.001	NA	NA	0.001	0.001	0.001	1952-01-01	2011-01-01	59	59	aerial photography (transect) averaged	1.811	3.873	1.037	8.162	11.545	1.923	26.2661	4	9.969	3.586	690	18.3	11.4917	11.7
Evolution du trait de côte (histogrammes)	2016-01-29	MEEM	NA	Meem	NA	cerema_0477	NA	atlantic	Europe	France	200	undifferentiated recent marine deposits	FALSE	FALSE	FALSE	FALSE	NA	NA	NA	5.2	7	5.2	119	weak	0.095	NA	NA	0.095	0.095	0.095	1952-01-01	2011-01-01	59	59	aerial photography (transect) averaged	1.811	3.873	1.037	8.162	11.545	1.923	26.2661	4	9.969	3.586	690	18.3	11.4917	11.7
Evolution du trait de côte (histogrammes)	2016-01-29	MEEM	NA	Meem	NA	cerema_0478	NA	atlantic	Europe	France	400	schist	FALSE	FALSE	FALSE	FALSE	NA	NA	NA	1	1	1	101	strong	0.001	NA	NA	0.001	0.001	0.001	1952-01-01	2011-01-01	59	59	aerial photography (transect) averaged	1.811	3.873	1.037	8.162	11.545	1.923	26.2661	4	9.969	3.586	690	18.3	11.4917	11.7
Evolution du trait de côte (histogrammes)	2016-01-29	MEEM	NA	Meem	NA	cerema_0479	mediterranean	NA	Europe	France	200	fluvial deposits	FALSE	FALSE	FALSE	FALSE	NA	NA	NA	10.2	28	10.2	260	weak	0.056	NA	NA	0.056	0.056	0.056	1952-01-01	2011-01-01	87.21	87.21	aerial photography (transect) averaged	0.904	2.313	0.692	4.787	6.921	1.249	3.83851	2.25	19.163	0.17	590	18	14.3333	15.6
Evolution du trait de côte (histogrammes)	2016-01-29	MEEM	NA	Meem	NA	cerema_0480	NA	atlantic	Europe	France	200	undifferentiated recent marine deposits	FALSE	FALSE	FALSE	FALSE	NA	NA	NA	3	7	3	50	weak	0.001	NA	NA	0.001	0.001	0.001	1952-01-01	2011-01-01	59	59	aerial photography (transect) averaged	1.811	3.873	1.037	8.162	11.545	1.923	26.2661	4	9.969	3.586	690	18.3	11.4917	11.7
Evolution du trait de côte (histogrammes)	2016-01-29	MEEM	NA	Meem	NA	cerema_0481	NA	atlantic	Europe	France	1000	schist	FALSE	FALSE	FALSE	FALSE	NA	NA	NA	1.2	2	1.2	59	strong	0.001	NA	NA	0.001	0.001	0.001	1952-01-01	2011-01-01	59	59	aerial photography (transect) averaged	1.811	3.873	1.037	8.162	11.545	1.923	26.2661	4	9.969	3.724	690	18.3	11.4917	11.7
Evolution du trait de côte (histogrammes)	2016-01-29	MEEM	NA	Meem	NA	cerema_0482	NA	atlantic	Europe	France	1000	schist	FALSE	FALSE	FALSE	FALSE	NA	NA	NA	5.1	11	5.1	55	strong	0.014	NA	NA	0.001	0.066	0.014	1952-01-01	2011-01-01	59	59	aerial photography (transect) averaged	1.811	3.873	1.037	8.162	11.545	1.923	26.2661	4	9.969	3.724	690	18.3	11.4917	11.7
Evolution du trait de côte (histogrammes)	2016-01-29	MEEM	NA	Meem	NA	cerema_0483	NA	atlantic	Europe	France	200	schist	FALSE	FALSE	FALSE	FALSE	NA	NA	NA	3.5	4	3.5	100	strong	0.085	NA	NA	0.085	0.085	0.085	1952-01-01	2011-01-01	59	59	aerial photography (transect) averaged	1.811	3.873	1.037	8.162	11.545	1.923	26.2661	4	9.969	3.724	690	18.3	11.4917	11.7
Evolution du trait de côte (histogrammes)	2016-01-29	MEEM	NA	Meem	NA	cerema_0484	NA	atlantic	Europe	France	200	schist	FALSE	FALSE	FALSE	FALSE	NA	NA	NA	1.5	2	1.5	93	strong	0.17	NA	NA	0.17	0.17	0.17	1952-01-01	2011-01-01	59	59	aerial photography (transect) averaged	1.811	3.873	1.037	8.162	11.545	1.923	26.2661	4	9.969	3.724	690	18.3	11.4917	11.7
Evolution du trait de côte (histogrammes)	2016-01-29	MEEM	NA	Meem	NA	cerema_0485	NA	atlantic	Europe	France	600	schist	FALSE	FALSE	FALSE	FALSE	NA	NA	NA	10.4	14	10.4	224	strong	0.001	NA	NA	0.001	0.001	0.001	1952-01-01	2011-01-01	59	59	aerial photography (transect) averaged	1.811	3.873	1.037	8.162	11.545	1.923	26.2661	4	9.969	3.734	643	16.9	11.9667	12.6
Evolution du trait de côte (histogrammes)	2016-01-29	MEEM	NA	Meem	NA	cerema_0486	mediterranean	NA	Europe	France	200	limestone	FALSE	FALSE	FALSE	FALSE	NA	NA	NA	27.9	59	27.9	82	strong	0.053	NA	NA	0.053	0.053	0.053	1952-01-01	2011-01-01	84.21	84.21	aerial photography (transect) averaged	1.054	2.707	0.803	4.882	7.108	1.271	5.32159	2.25	18.709	0.165	556	15.2	14.2583	15.5
Evolution du trait de côte (histogrammes)	2016-01-29	MEEM	NA	Meem	NA	cerema_0487	NA	atlantic	Europe	France	200		FALSE	FALSE	FALSE	FALSE	NA	NA	NA	13.6	27	13.6	51	weak	0.001	NA	NA	0.001	0.001	0.001	1952-01-01	2011-01-01	59	59	aerial photography (transect) averaged	1.835	3.876	1.016	8.452	11.616	1.825	27.925	4.25	9.622	3.174	730	14.4	11.5833	11
Evolution du trait de côte (histogrammes)	2016-01-29	MEEM	NA	Meem	NA	cerema_0488	NA	atlantic	Europe	France	200		FALSE	FALSE	FALSE	FALSE	NA	NA	NA	7.8	15	7.8	134	weak	0.001	NA	NA	0.001	0.001	0.001	1952-01-01	2011-01-01	59	59	aerial photography (transect) averaged	1.835	3.876	1.016	8.452	11.616	1.825	27.925	4.25	9.622	3.208	730	14.4	11.5833	11
Evolution du trait de côte (histogrammes)	2016-01-29	MEEM	NA	Meem	NA	cerema_0489	NA	atlantic	Europe	France	2400	metamorphic	FALSE	FALSE	FALSE	FALSE	NA	NA	NA	10.7	29	10.7	74	strong	0.001	NA	NA	0.001	0.001	0.001	1952-01-01	2011-01-01	59	59	aerial photography (transect) averaged	1.835	3.876	1.016	8.452	11.616	1.825	27.925	4.25	9.622	3.208	730	14.4	11.5833	11
Evolution du trait de côte (histogrammes)	2016-01-29	MEEM	NA	Meem	NA	cerema_0490	NA	atlantic	Europe	France	600	metamorphic	FALSE	FALSE	FALSE	FALSE	NA	NA	NA	22	34	22	304	strong	0.001	NA	NA	0.001	0.001	0.001	1952-01-01	2011-01-01	59	59	aerial photography (transect) averaged	1.835	3.876	1.016	8.452	11.616	1.825	27.925	4.25	9.622	3.208	730	14.4	11.5833	11
Evolution du trait de côte (histogrammes)	2016-01-29	MEEM	NA	Meem	NA	cerema_0491	NA	atlantic	Europe	France	600	metamorphic	FALSE	FALSE	FALSE	FALSE	NA	NA	NA	9.8	18	9.8	80	strong	0.001	NA	NA	0.001	0.001	0.001	1952-01-01	2011-01-01	59	59	aerial photography (transect) averaged	1.811	3.873	1.037	8.162	11.545	1.923	26.2661	4	9.969	3.586	690	18.3	11.4917	11.7
Evolution du trait de côte (histogrammes)	2016-01-29	MEEM	NA	Meem	NA	cerema_0492	NA	atlantic	Europe	France	200	gneiss	FALSE	FALSE	FALSE	FALSE	NA	NA	NA	4	11	4	284	strong	0.001	NA	NA	0.001	0.001	0.001	1952-01-01	2011-01-01	59	59	aerial photography (transect) averaged	1.811	3.873	1.037	8.162	11.545	1.923	26.2661	4	9.969	3.586	690	18.3	11.4917	11.7
Evolution du trait de côte (histogrammes)	2016-01-29	MEEM	NA	Meem	NA	cerema_0493	NA	atlantic	Europe	France	800	granite	FALSE	FALSE	FALSE	FALSE	NA	NA	NA	10.1	21	10.1	20	strong	0.001	NA	NA	0.001	0.001	0.001	1952-01-01	2011-01-01	59	59	aerial photography (transect) averaged	1.811	3.873	1.037	8.162	11.545	1.923	26.2661	4	9.969	3.586	690	18.3	11.4917	11.7
Evolution du trait de côte (histogrammes)	2016-01-29	MEEM	NA	Meem	NA	cerema_0494	NA	atlantic	Europe	France	400	granite	FALSE	FALSE	FALSE	FALSE	NA	NA	NA	15.7	22	15.7	5	strong	0.001	NA	NA	0.001	0.001	0.001	1952-01-01	2011-01-01	59	59	aerial photography (transect) averaged	1.811	3.873	1.037	8.162	11.545	1.923	26.2661	4	9.969	3.586	690	18.3	11.4917	11.7
Evolution du trait de côte (histogrammes)	2016-01-29	MEEM	NA	Meem	NA	cerema_0495	NA	atlantic	Europe	France	1400	granite	FALSE	FALSE	FALSE	FALSE	NA	NA	NA	4.9	17	4.9	71	strong	0.001	NA	NA	0.001	0.001	0.001	1952-01-01	2011-01-01	59	59	aerial photography (transect) averaged	1.811	3.873	1.037	8.162	11.545	1.923	26.2661	4	9.969	3.586	690	18.3	11.4917	11.7
Evolution du trait de côte (histogrammes)	2016-01-29	MEEM	NA	Meem	NA	cerema_0496	NA	atlantic	Europe	France	2000	granite	FALSE	FALSE	FALSE	FALSE	NA	NA	NA	9.3	22	9.3	192	strong	0.001	NA	NA	0.001	0.001	0.001	1952-01-01	2011-01-01	59	59	aerial photography (transect) averaged	1.811	3.873	1.037	8.162	11.545	1.923	26.2661	4	9.969	3.586	690	18.3	11.4917	11.7
Evolution du trait de côte (histogrammes)	2016-01-29	MEEM	NA	Meem	NA	cerema_0497	NA	atlantic	Europe	France	200	granite	FALSE	FALSE	FALSE	FALSE	NA	NA	NA	10.3	21	10.3	173	strong	0.001	NA	NA	0.001	0.001	0.001	1952-01-01	2011-01-01	59	59	aerial photography (transect) averaged	1.811	3.873	1.037	8.162	11.545	1.923	26.2661	4	9.969	3.586	690	18.3	11.4917	11.7
Evolution du trait de côte (histogrammes)	2016-01-29	MEEM	NA	Meem	NA	cerema_0498	NA	atlantic	Europe	France	400	granite	FALSE	FALSE	FALSE	FALSE	NA	NA	NA	2.8	11	2.8	89	strong	0.001	NA	NA	0.001	0.001	0.001	1952-01-01	2011-01-01	59	59	aerial photography (transect) averaged	1.811	3.873	1.037	8.162	11.545	1.923	26.2661	4	9.969	3.586	690	18.3	11.4917	11.7
Evolution du trait de côte (histogrammes)	2016-01-29	MEEM	NA	Meem	NA	cerema_0499	NA	atlantic	Europe	France	1000	granite	FALSE	FALSE	FALSE	FALSE	NA	NA	NA	4.4	14	4.4	346	strong	0.001	NA	NA	0.001	0.001	0.001	1952-01-01	2011-01-01	59	59	aerial photography (transect) averaged	1.811	3.873	1.037	8.162	11.545	1.923	26.2661	4	9.969	3.586	690	18.3	11.4917	11.7
Evolution du trait de côte (histogrammes)	2016-01-29	MEEM	NA	Meem	NA	cerema_0500	NA	atlantic	Europe	France	200	granite	FALSE	FALSE	FALSE	FALSE	NA	NA	NA	3	3	3	100	strong	0.001	NA	NA	0.001	0.001	0.001	1952-01-01	2011-01-01	59	59	aerial photography (transect) averaged	1.811	3.873	1.037	8.162	11.545	1.923	26.2661	4	9.969	3.586	690	18.3	11.4917	11.7
Evolution du trait de côte (histogrammes)	2016-01-29	MEEM	NA	Meem	NA	cerema_0501	mediterranean	NA	Europe	France	1000	limestone	FALSE	FALSE	FALSE	FALSE	NA	NA	NA	27	46	27	91	strong	0.001	NA	NA	0.001	0.001	0.001	1952-01-01	2011-01-01	84.21	84.21	aerial photography (transect) averaged	1.054	2.707	0.803	4.882	7.108	1.271	5.32159	2.25	18.709	0.165	556	15.2	14.2583	15.5
Evolution du trait de côte (histogrammes)	2016-01-29	MEEM	NA	Meem	NA	cerema_0502	NA	atlantic	Europe	France	600	granite	FALSE	FALSE	FALSE	FALSE	NA	NA	NA	3.9	7	3.9	289	strong	0.001	NA	NA	0.001	0.001	0.001	1952-01-01	2011-01-01	59	59	aerial photography (transect) averaged	1.811	3.873	1.037	8.162	11.545	1.923	26.2661	4	9.969	3.586	690	18.3	11.4917	11.7
Evolution du trait de côte (histogrammes)	2016-01-29	MEEM	NA	Meem	NA	cerema_0503	NA	atlantic	Europe	France	200	granite	FALSE	FALSE	FALSE	FALSE	NA	NA	NA	2.8	3	2.8	324	strong	0.001	NA	NA	0.001	0.001	0.001	1952-01-01	2011-01-01	59	59	aerial photography (transect) averaged	1.811	3.873	1.037	8.162	11.545	1.923	26.2661	4	9.969	3.586	690	18.3	11.4917	11.7
Evolution du trait de côte (histogrammes)	2016-01-29	MEEM	NA	Meem	NA	cerema_0504	NA	atlantic	Europe	France	200	granite	FALSE	FALSE	FALSE	FALSE	NA	NA	NA	3.5	7	3.5	211	strong	0.001	NA	NA	0.001	0.001	0.001	1952-01-01	2011-01-01	59	59	aerial photography (transect) averaged	1.811	3.873	1.037	8.162	11.545	1.923	26.2661	4	9.969	3.586	690	18.3	11.4917	11.7
Evolution du trait de côte (histogrammes)	2016-01-29	MEEM	NA	Meem	NA	cerema_0505	NA	atlantic	Europe	France	200	metamorphic	FALSE	FALSE	FALSE	FALSE	NA	NA	NA	3.5	4	3.5	100	strong	0.001	NA	NA	0.001	0.001	0.001	1952-01-01	2011-01-01	59	59	aerial photography (transect) averaged	1.835	3.876	1.016	8.452	11.616	1.825	27.925	4.25	9.622	3.15	765	11.2	11.7	10.4
Evolution du trait de côte (histogrammes)	2016-01-29	MEEM	NA	Meem	NA	cerema_0506	NA	atlantic	Europe	France	200	metamorphic	FALSE	FALSE	FALSE	FALSE	NA	NA	NA	4.3	6	4.3	277	strong	0.001	NA	NA	0.001	0.001	0.001	1952-01-01	2011-01-01	59	59	aerial photography (transect) averaged	1.835	3.876	1.016	8.452	11.616	1.825	27.925	4.25	9.622	3.15	765	11.2	11.7	10.4
Evolution du trait de côte (histogrammes)	2016-01-29	MEEM	NA	Meem	NA	cerema_0507	NA	atlantic	Europe	France	2200	gneiss	FALSE	FALSE	FALSE	FALSE	NA	NA	NA	20.7	40	20.7	78	strong	0.001	NA	NA	0.001	0.001	0.001	1952-01-01	2011-01-01	59	59	aerial photography (transect) averaged	1.835	3.876	1.016	8.452	11.616	1.825	27.925	4.25	9.622	3.15	765	11.2	11.7	10.4
Evolution du trait de côte (histogrammes)	2016-01-29	MEEM	NA	Meem	NA	cerema_0508	NA	atlantic	Europe	France	200	gneiss	FALSE	FALSE	FALSE	FALSE	NA	NA	NA	16.2	34	16.2	357	strong	0.001	NA	NA	0.001	0.001	0.001	1952-01-01	2011-01-01	59	59	aerial photography (transect) averaged	1.835	3.876	1.016	8.452	11.616	1.825	27.925	4.25	9.622	3.15	765	11.2	11.7	10.4
Evolution du trait de côte (histogrammes)	2016-01-29	MEEM	NA	Meem	NA	cerema_0509	NA	atlantic	Europe	France	2000	schist	FALSE	FALSE	FALSE	FALSE	NA	NA	NA	15.8	30	15.8	118	strong	0.001	NA	NA	0.001	0.001	0.001	1952-01-01	2011-01-01	59	59	aerial photography (transect) averaged	1.835	3.876	1.016	8.452	11.616	1.825	27.925	4.25	9.622	3.15	765	11.2	11.7	10.4
Evolution du trait de côte (histogrammes)	2016-01-29	MEEM	NA	Meem	NA	cerema_0510	NA	atlantic	Europe	France	400	granite	FALSE	FALSE	FALSE	FALSE	NA	NA	NA	6.8	10	6.8	225	strong	0.001	NA	NA	0.001	0.001	0.001	1952-01-01	2011-01-01	57	57	aerial photography (transect) averaged	2.038	4.227	1.105	8.3	11.538	1.827	33.8258	4	9.782	5.126	874	18.2	11.1167	10.1
Evolution du trait de côte (histogrammes)	2016-01-29	MEEM	NA	Meem	NA	cerema_0511	NA	atlantic	Europe	France	400	granite	FALSE	FALSE	FALSE	FALSE	NA	NA	NA	4.9	10	4.9	254	strong	0.001	NA	NA	0.001	0.001	0.001	1952-01-01	2011-01-01	57	57	aerial photography (transect) averaged	2.038	4.227	1.105	8.3	11.538	1.827	33.8258	4	9.782	5.126	874	18.2	11.1167	10.1
Evolution du trait de côte (histogrammes)	2016-01-29	MEEM	NA	Meem	NA	cerema_0512	NA	atlantic	Europe	France	800	granite	FALSE	FALSE	FALSE	FALSE	NA	NA	NA	6.2	10	6.2	231	strong	0.00475	NA	NA	0.001	0.016	0.00475	1952-01-01	2011-01-01	57	57	aerial photography (transect) averaged	2.038	4.227	1.105	8.3	11.538	1.827	33.8258	4	9.782	5.126	874	18.2	11.1167	10.1
Evolution du trait de côte (histogrammes)	2016-01-29	MEEM	NA	Meem	NA	cerema_0513	NA	atlantic	Europe	France	200	granite	FALSE	FALSE	FALSE	FALSE	NA	NA	NA	8.7	12	8.7	226	strong	0.276	NA	NA	0.276	0.276	0.276	1952-01-01	2011-01-01	57	57	aerial photography (transect) averaged	2.038	4.227	1.105	8.3	11.538	1.827	33.8258	4	9.782	5.126	874	18.2	11.1167	10.1
Evolution du trait de côte (histogrammes)	2016-01-29	MEEM	NA	Meem	NA	cerema_0514	NA	atlantic	Europe	France	1400	granite	FALSE	FALSE	FALSE	FALSE	NA	NA	NA	9.7	21	9.7	265	strong	0.0231429	NA	NA	0.001	0.156	0.0231429	1952-01-01	2011-01-01	57	57	aerial photography (transect) averaged	2.038	4.227	1.105	8.3	11.538	1.827	33.8258	4	9.782	5.243	874	18.2	11.1167	10.1
Evolution du trait de côte (histogrammes)	2016-01-29	MEEM	NA	Meem	NA	cerema_0515	mediterranean	NA	Europe	France	200		FALSE	FALSE	FALSE	FALSE	NA	NA	NA	37.5	128	37.5	134	weak	0.021	NA	NA	0.021	0.021	0.021	1952-01-01	2011-01-01	87.21	87.21	aerial photography (transect) averaged	0.904	2.313	0.692	4.787	6.921	1.249	3.83851	2.25	19.163	0.192	701	27.1	12.8167	14.9
Evolution du trait de côte (histogrammes)	2016-01-29	MEEM	NA	Meem	NA	cerema_0516	mediterranean	NA	Europe	France	600	limestone	FALSE	FALSE	FALSE	FALSE	NA	NA	NA	29.7	52	29.7	113	strong	0.024	NA	NA	0.001	0.07	0.024	1952-01-01	2011-01-01	84.21	84.21	aerial photography (transect) averaged	1.054	2.707	0.803	4.882	7.108	1.271	5.32159	2.25	18.709	0.165	587	12.5	14.4833	14.8
Evolution du trait de côte (histogrammes)	2016-01-29	MEEM	NA	Meem	NA	cerema_0517	NA	atlantic	Europe	France	2400	sandstone	FALSE	FALSE	FALSE	FALSE	NA	NA	NA	37.5	69	37.5	347	strong	0.001	NA	NA	0.001	0.001	0.001	1952-01-01	2011-01-01	56	56	aerial photography (transect) averaged	1.591	3.325	0.881	7.349	10.564	1.737	18.2528	3.25	12.722	7.11	796	25.9	10.9917	11.2
Evolution du trait de côte (histogrammes)	2016-01-29	MEEM	NA	Meem	NA	cerema_0518	english channel	atlantic	Europe	France	5200	chalk	FALSE	FALSE	FALSE	FALSE	NA	NA	NA	56.7	91	56.7	242	weak	0.188385	NA	NA	0.017	0.32	0.188385	1952-01-01	2011-01-01	60	60	aerial photography (transect) averaged	1.264	2.952	0.835	6.101	8.658	1.397	9.56439	2.5	15.181	6.69	616	44.2	10.325	13.6
Evolution du trait de côte (histogrammes)	2016-01-29	MEEM	NA	Meem	NA	cerema_0519	english channel	atlantic	Europe	France	200	fluvial deposits	FALSE	FALSE	FALSE	FALSE	NA	NA	NA	10.2	17	10.2	224	weak	0.012	NA	NA	0.012	0.012	0.012	1952-01-01	2011-01-01	60	60	aerial photography (transect) averaged	1.264	2.952	0.835	6.101	8.658	1.397	9.56439	2.5	15.181	6.69	616	44.2	10.325	13.6
Evolution du trait de côte (histogrammes)	2016-01-29	MEEM	NA	Meem	NA	cerema_0520	mediterranean	NA	Europe	France	200	sedimentaires	FALSE	FALSE	FALSE	FALSE	NA	NA	NA	34.6	57	34.6	131	strong	0.15	NA	NA	0.15	0.15	0.15	1952-01-01	2011-01-01	84.21	84.21	aerial photography (transect) averaged	1.054	2.707	0.803	4.882	7.108	1.271	5.32159	2.25	18.709	0.165	587	12.5	14.4833	14.8
Evolution du trait de côte (histogrammes)	2016-01-29	MEEM	NA	Meem	NA	cerema_0521	english channel	atlantic	Europe	France	200	loess and silts	FALSE	FALSE	FALSE	FALSE	NA	NA	NA	25.1	53	25.1	258	weak	0.053	NA	NA	0.053	0.053	0.053	1952-01-01	2011-01-01	67	67	aerial photography (transect) averaged	1.264	2.952	0.835	6.101	8.658	1.397	9.56439	2.5	15.181	5.328	571	28.9	10.725	12.3
Evolution du trait de côte (histogrammes)	2016-01-29	MEEM	NA	Meem	NA	cerema_0522	english channel	atlantic	Europe	France	800	chalk	FALSE	FALSE	FALSE	FALSE	NA	NA	NA	53.8	83	53.8	270	weak	0.0195	NA	NA	0.001	0.051	0.0195	1952-01-01	2011-01-01	67	67	aerial photography (transect) averaged	1.264	2.952	0.835	6.101	8.658	1.397	9.56439	2.5	15.181	5.328	571	28.9	10.725	12.3
Evolution du trait de côte (histogrammes)	2016-01-29	MEEM	NA	Meem	NA	cerema_0523	english channel	atlantic	Europe	France	200	loess and silts	FALSE	FALSE	FALSE	FALSE	NA	NA	NA	41.6	77	41.6	245	weak	0.085	NA	NA	0.085	0.085	0.085	1952-01-01	2011-01-01	67	67	aerial photography (transect) averaged	1.264	2.952	0.835	6.101	8.658	1.397	9.56439	2.5	15.181	5.328	571	28.9	10.725	12.3
Evolution du trait de côte (histogrammes)	2016-01-29	MEEM	NA	Meem	NA	cerema_0524	english channel	atlantic	Europe	France	4800	chalk	FALSE	FALSE	FALSE	FALSE	NA	NA	NA	62.2	96	62.2	252	weak	0.0749583	NA	NA	0.001	0.222	0.0749583	1952-01-01	2011-01-01	67	67	aerial photography (transect) averaged	1.264	2.952	0.835	6.101	8.658	1.397	9.56439	2.5	15.181	5.328	571	28.9	10.725	12.3
Evolution du trait de côte (histogrammes)	2016-01-29	MEEM	NA	Meem	NA	cerema_0525	english channel	atlantic	Europe	France	1600	chalk	FALSE	FALSE	FALSE	FALSE	NA	NA	NA	54.8	94	54.8	243	weak	0.001	NA	NA	0.001	0.001	0.001	1952-01-01	2011-01-01	67	67	aerial photography (transect) averaged	1.264	2.952	0.835	6.101	8.658	1.397	9.56439	2.5	15.181	5.328	571	28.9	10.725	12.3
Evolution du trait de côte (histogrammes)	2016-01-29	MEEM	NA	Meem	NA	cerema_0526	english channel	atlantic	Europe	France	200	loess and silts	FALSE	FALSE	FALSE	FALSE	NA	NA	NA	41.5	76	41.5	210	weak	0.001	NA	NA	0.001	0.001	0.001	1952-01-01	2011-01-01	67	67	aerial photography (transect) averaged	1.264	2.952	0.835	6.101	8.658	1.397	9.56439	2.5	15.181	5.196	571	28.9	10.725	12.3
Evolution du trait de côte (histogrammes)	2016-01-29	MEEM	NA	Meem	NA	cerema_0527	english channel	atlantic	Europe	France	4400	chalk	FALSE	FALSE	FALSE	FALSE	NA	NA	NA	61.9	108	61.9	216	weak	0.008	NA	NA	0.001	0.095	0.008	1952-01-01	2011-01-01	67	67	aerial photography (transect) averaged	1.264	2.952	0.835	6.101	8.658	1.397	9.56439	2.5	15.181	5.248	571	28.9	10.725	12.3
Evolution du trait de côte (histogrammes)	2016-01-29	MEEM	NA	Meem	NA	cerema_0528	english channel	atlantic	Europe	France	1800	chalk	FALSE	FALSE	FALSE	FALSE	NA	NA	NA	63.8	97	63.8	196	weak	0.139778	NA	NA	0.001	0.289	0.139778	1952-01-01	2011-01-01	67	67	aerial photography (transect) averaged	1.264	2.952	0.835	6.101	8.658	1.397	9.56439	2.5	15.181	5.245	571	28.9	10.725	12.3
Evolution du trait de côte (histogrammes)	2016-01-29	MEEM	NA	Meem	NA	cerema_0529	mediterranean	NA	Europe	France	600	sedimentaires	FALSE	FALSE	FALSE	FALSE	NA	NA	NA	18.4	47	18.4	133	strong	0.00766667	NA	NA	0.001	0.021	0.00766667	1952-01-01	2011-01-01	84.21	84.21	aerial photography (transect) averaged	1.054	2.707	0.803	4.882	7.108	1.271	5.32159	2.25	18.709	0.165	587	12.5	14.4833	14.8
Evolution du trait de côte (histogrammes)	2016-01-29	MEEM	NA	Meem	NA	cerema_0530	english channel	atlantic	Europe	France	2600	chalk	FALSE	FALSE	FALSE	FALSE	NA	NA	NA	60.7	99	60.7	248	weak	0.0953077	NA	NA	0.046	0.186	0.0953077	1952-01-01	2011-01-01	66	66	aerial photography (transect) averaged	1.264	2.952	0.835	6.101	8.658	1.397	9.56439	2.5	15.181	6.69	616	44.2	10.325	13.6
Evolution du trait de côte (histogrammes)	2016-01-29	MEEM	NA	Meem	NA	cerema_0531	english channel	atlantic	Europe	France	800	metamorphic	FALSE	FALSE	FALSE	FALSE	NA	NA	NA	29.2	60	29.2	146	strong	0.02825	NA	NA	0.001	0.11	0.02825	1952-01-01	2011-01-01	63	63	aerial photography (transect) averaged	1.391	3.094	0.852	6.483	9.187	1.468	12.3081	2.625	14.807	6.043	642	33.3	11.3917	11.5
Evolution du trait de côte (histogrammes)	2016-01-29	MEEM	NA	Meem	NA	cerema_0532	english channel	atlantic	Europe	France	3000	granite	FALSE	FALSE	FALSE	FALSE	NA	NA	NA	44.3	81	44.3	100	strong	0.001	NA	NA	0.001	0.001	0.001	1952-01-01	2011-01-01	63	63	aerial photography (transect) averaged	1.391	3.094	0.852	6.483	9.187	1.468	12.3081	2.625	14.807	6.043	766	37.6	10.4667	11.9
Evolution du trait de côte (histogrammes)	2016-01-29	MEEM	NA	Meem	NA	cerema_0533	english channel	atlantic	Europe	France	3000	granite	FALSE	FALSE	FALSE	FALSE	NA	NA	NA	43.9	81	43.9	153	strong	0.001	NA	NA	0.001	0.001	0.001	1952-01-01	2011-01-01	63	63	aerial photography (transect) averaged	1.391	3.094	0.852	6.483	9.187	1.468	12.3081	2.625	14.807	6.043	766	37.6	10.4667	11.9
Evolution du trait de côte (histogrammes)	2016-01-29	MEEM	NA	Meem	NA	cerema_0534	english channel	atlantic	Europe	France	200	aeolianite	FALSE	FALSE	FALSE	FALSE	NA	NA	NA	15	39	15	137	weak	0.415	NA	NA	0.415	0.415	0.415	1952-01-01	2011-01-01	63	63	aerial photography (transect) averaged	1.391	3.094	0.852	6.483	9.187	1.468	12.3081	2.625	14.807	6.043	642	33.3	11.3917	11.5
Evolution du trait de côte (histogrammes)	2016-01-29	MEEM	NA	Meem	NA	cerema_0535	english channel	atlantic	Europe	France	1000	metamorphic	FALSE	FALSE	FALSE	FALSE	NA	NA	NA	27.2	67	27.2	111	strong	0.001	NA	NA	0.001	0.001	0.001	1952-01-01	2011-01-01	63	63	aerial photography (transect) averaged	1.391	3.094	0.852	6.483	9.187	1.468	12.3081	2.625	14.807	6.417	642	33.3	11.3917	11.5
Evolution du trait de côte (histogrammes)	2016-01-29	MEEM	NA	Meem	NA	cerema_0536	english channel	atlantic	Europe	France	400	metamorphic	FALSE	FALSE	FALSE	FALSE	NA	NA	NA	27.3	52	27.3	231	strong	0.001	NA	NA	0.001	0.001	0.001	1952-01-01	2011-01-01	63	63	aerial photography (transect) averaged	1.391	3.094	0.852	6.483	9.187	1.468	12.3081	2.625	14.807	6.043	766	37.6	10.4667	11.9
Evolution du trait de côte (histogrammes)	2016-01-29	MEEM	NA	Meem	NA	cerema_0537	NA	atlantic	Europe	France	400	sedimentaires	FALSE	FALSE	FALSE	FALSE	NA	NA	NA	26	38	26	233	strong	0.109	NA	NA	0.045	0.173	0.109	1952-01-01	2011-01-01	63	63	aerial photography (transect) averaged	1.391	3.094	0.852	6.483	9.187	1.468	12.3081	2.625	14.807	8.117	581	28.8	11.4833	12.1
Evolution du trait de côte (histogrammes)	2016-01-29	MEEM	NA	Meem	NA	cerema_0538	NA	atlantic	Europe	France	400	sedimentaires	FALSE	FALSE	FALSE	FALSE	NA	NA	NA	28.5	42	28.5	246	strong	0.109	NA	NA	0.045	0.173	0.109	1952-01-01	2011-01-01	63	63	aerial photography (transect) averaged	1.391	3.094	0.852	6.483	9.187	1.468	12.3081	2.625	14.807	8.117	581	28.8	11.4833	12.1
Evolution du trait de côte (histogrammes)	2016-01-29	MEEM	NA	Meem	NA	cerema_0539	NA	atlantic	Europe	France	800	sedimentaires	FALSE	FALSE	FALSE	FALSE	NA	NA	NA	13.4	33	13.4	257	strong	0.001	NA	NA	0.001	0.001	0.001	1952-01-01	2011-01-01	63	63	aerial photography (transect) averaged	1.391	3.094	0.852	6.483	9.187	1.468	12.3081	2.625	14.807	8.117	581	28.8	11.4833	12.1
Evolution du trait de côte (histogrammes)	2016-01-29	MEEM	NA	Meem	NA	cerema_0540	NA	atlantic	Europe	France	1400	sedimentaires	FALSE	FALSE	FALSE	FALSE	NA	NA	NA	20.6	41	20.6	131	strong	0.001	NA	NA	0.001	0.001	0.001	1952-01-01	2011-01-01	63	63	aerial photography (transect) averaged	1.391	3.094	0.852	6.483	9.187	1.468	12.3081	2.625	14.807	8.117	581	28.8	11.4833	12.1
Evolution du trait de côte (histogrammes)	2016-01-29	MEEM	NA	Meem	NA	cerema_0541	NA	atlantic	Europe	France	1400	sedimentaires	FALSE	FALSE	FALSE	FALSE	NA	NA	NA	18.8	37	18.8	113	strong	0.001	NA	NA	0.001	0.001	0.001	1952-01-01	2011-01-01	63	63	aerial photography (transect) averaged	1.391	3.094	0.852	6.483	9.187	1.468	12.3081	2.625	14.807	8.117	581	28.8	11.4833	12.1
Evolution du trait de côte (histogrammes)	2016-01-29	MEEM	NA	Meem	NA	cerema_0542	NA	atlantic	Europe	France	200	aeolianite	FALSE	FALSE	FALSE	FALSE	NA	NA	NA	37.4	69	37.4	197	weak	0.001	NA	NA	0.001	0.001	0.001	1952-01-01	2011-01-01	63	63	aerial photography (transect) averaged	1.391	3.094	0.852	6.483	9.187	1.468	12.3081	2.625	14.807	8.245	581	28.8	11.4833	12.1
Evolution du trait de côte (histogrammes)	2016-01-29	MEEM	NA	Meem	NA	cerema_0543	NA	atlantic	Europe	France	3600	sedimentaires	FALSE	FALSE	FALSE	FALSE	NA	NA	NA	48.4	78	48.4	92	strong	0.001	NA	NA	0.001	0.001	0.001	1952-01-01	2011-01-01	63	63	aerial photography (transect) averaged	1.391	3.094	0.852	6.483	9.187	1.468	12.3081	2.625	14.807	8.245	581	28.8	11.4833	12.1
Evolution du trait de côte (histogrammes)	2016-01-29	MEEM	NA	Meem	NA	cerema_0544	NA	atlantic	Europe	France	3600	sedimentaires	FALSE	FALSE	FALSE	FALSE	NA	NA	NA	35.3	76	35.3	139	strong	0.001	NA	NA	0.001	0.001	0.001	1952-01-01	2011-01-01	63	63	aerial photography (transect) averaged	1.391	3.094	0.852	6.483	9.187	1.468	12.3081	2.625	14.807	8.245	581	28.8	11.4833	12.1
Evolution du trait de côte (histogrammes)	2016-01-29	MEEM	NA	Meem	NA	cerema_0545	NA	atlantic	Europe	France	400	granite	FALSE	FALSE	FALSE	FALSE	NA	NA	NA	7.6	32	7.6	270	strong	0.001	NA	NA	0.001	0.001	0.001	1952-01-01	2011-01-01	63	63	aerial photography (transect) averaged	1.391	3.094	0.852	6.483	9.187	1.468	12.3081	2.625	14.807	8.383	581	28.8	11.4833	12.1
Evolution du trait de côte (histogrammes)	2016-01-29	MEEM	NA	Meem	NA	cerema_0546	mediterranean	NA	Europe	France	200	sedimentaires	FALSE	FALSE	FALSE	FALSE	NA	NA	NA	29.7	43	29.7	207	strong	0.021	NA	NA	0.021	0.021	0.021	1952-01-01	2011-01-01	84.21	84.21	aerial photography (transect) averaged	1.054	2.707	0.803	4.882	7.108	1.271	5.32159	2.25	18.709	0.165	587	12.5	14.4833	14.8
Evolution du trait de côte (histogrammes)	2016-01-29	MEEM	NA	Meem	NA	cerema_0547	NA	atlantic	Europe	France	2400	volcanic rock	FALSE	FALSE	FALSE	FALSE	NA	NA	NA	10.1	19	10.1	270	strong	0.001	NA	NA	0.001	0.001	0.001	1952-01-01	2011-01-01	56	56	aerial photography (transect) averaged	1.591	3.325	0.881	7.349	10.564	1.737	18.2528	3.25	12.722	6.359	714	19.5	11.1417	10.5
Evolution du trait de côte (histogrammes)	2016-01-29	MEEM	NA	Meem	NA	cerema_0548	NA	atlantic	Europe	France	800	granite	FALSE	FALSE	FALSE	FALSE	NA	NA	NA	25.1	50	25.1	9	strong	0.001	NA	NA	0.001	0.001	0.001	1952-01-01	2011-01-01	56	56	aerial photography (transect) averaged	1.591	3.325	0.881	7.349	10.564	1.737	18.2528	3.25	12.722	6.06	714	19.5	11.1417	10.5
Evolution du trait de côte (histogrammes)	2016-01-29	MEEM	NA	Meem	NA	cerema_0549	NA	atlantic	Europe	France	1000	granite	FALSE	FALSE	FALSE	FALSE	NA	NA	NA	19.6	42	19.6	41	strong	0.001	NA	NA	0.001	0.001	0.001	1952-01-01	2011-01-01	56	56	aerial photography (transect) averaged	1.591	3.325	0.881	7.349	10.564	1.737	18.2528	3.25	12.722	6.06	714	19.5	11.1417	10.5
Evolution du trait de côte (histogrammes)	2016-01-29	MEEM	NA	Meem	NA	cerema_0550	NA	atlantic	Europe	France	1200	granite	FALSE	FALSE	FALSE	FALSE	NA	NA	NA	7.7	30	7.7	331	strong	0.001	NA	NA	0.001	0.001	0.001	1952-01-01	2011-01-01	56	56	aerial photography (transect) averaged	1.591	3.325	0.881	7.349	10.564	1.737	18.2528	3.25	12.722	6.06	714	19.5	11.1417	10.5
Evolution du trait de côte (histogrammes)	2016-01-29	MEEM	NA	Meem	NA	cerema_0551	NA	atlantic	Europe	France	2200	granite	FALSE	FALSE	FALSE	FALSE	NA	NA	NA	12.9	28	12.9	240	strong	0.001	NA	NA	0.001	0.001	0.001	1952-01-01	2011-01-01	56	56	aerial photography (transect) averaged	1.591	3.325	0.881	7.349	10.564	1.737	18.2528	3.25	12.722	6.06	714	19.5	11.1417	10.5
Evolution du trait de côte (histogrammes)	2016-01-29	MEEM	NA	Meem	NA	cerema_0552	mediterranean	NA	Europe	France	200	schist	FALSE	FALSE	FALSE	FALSE	NA	NA	NA	5.1	7	5.1	89	strong	0.407	NA	NA	0.407	0.407	0.407	1952-01-01	2011-01-01	87.21	87.21	aerial photography (transect) averaged	1.054	2.707	0.803	4.882	7.108	1.271	5.32159	2.25	18.709	0.162	587	12.5	14.4833	14.8
Evolution du trait de côte (histogrammes)	2016-01-29	MEEM	NA	Meem	NA	cerema_0553	NA	atlantic	Europe	France	3400	intermediate rocks	FALSE	FALSE	FALSE	FALSE	NA	NA	NA	18.7	39	18.7	3	strong	0.001	NA	NA	0.001	0.001	0.001	1952-01-01	2011-01-01	56	56	aerial photography (transect) averaged	1.591	3.325	0.881	7.349	10.564	1.737	18.2528	3.25	12.722	5.871	714	19.5	11.1417	10.5
Evolution du trait de côte (histogrammes)	2016-01-29	MEEM	NA	Meem	NA	cerema_0554	NA	atlantic	Europe	France	3400	intermediate rocks	FALSE	FALSE	FALSE	FALSE	NA	NA	NA	25.7	52	25.7	319	strong	0.001	NA	NA	0.001	0.001	0.001	1952-01-01	2011-01-01	56	56	aerial photography (transect) averaged	1.591	3.325	0.881	7.349	10.564	1.737	18.2528	3.25	12.722	5.871	714	19.5	11.1417	10.5
Evolution du trait de côte (histogrammes)	2016-01-29	MEEM	NA	Meem	NA	cerema_0555	NA	atlantic	Europe	France	2600	metamorphic	FALSE	FALSE	FALSE	FALSE	NA	NA	NA	44.4	86	44.4	171	strong	0.001	NA	NA	0.001	0.001	0.001	1952-01-01	2011-01-01	56	56	aerial photography (transect) averaged	1.591	3.325	0.881	7.349	10.564	1.737	18.2528	3.25	12.722	5.776	754	15.7	11.225	10.2
Evolution du trait de côte (histogrammes)	2016-01-29	MEEM	NA	Meem	NA	cerema_0556	NA	atlantic	Europe	France	3000	volcanic rock	FALSE	FALSE	FALSE	FALSE	NA	NA	NA	53.4	104	53.4	338	strong	0.00113333	NA	NA	0.001	0.003	0.00113333	1952-01-01	2011-01-01	56	56	aerial photography (transect) averaged	1.591	3.325	0.881	7.349	10.564	1.737	18.2528	3.25	12.722	6.878	796	25.9	10.9917	11.2
Evolution du trait de côte (histogrammes)	2016-01-29	MEEM	NA	Meem	NA	cerema_0557	mediterranean	NA	Europe	France	200	fluvial deposits	FALSE	FALSE	FALSE	FALSE	NA	NA	NA	7.7	17	7.7	90	weak	0.001	NA	NA	0.001	0.001	0.001	1952-01-01	2011-01-01	87.21	87.21	aerial photography (transect) averaged	1.054	2.707	0.803	4.882	7.108	1.271	5.32159	2.25	18.709	0.162	587	12.5	14.4833	14.8
Evolution du trait de côte (histogrammes)	2016-01-29	MEEM	NA	Meem	NA	cerema_0558	NA	atlantic	Europe	France	2600	sandstone	FALSE	FALSE	FALSE	FALSE	NA	NA	NA	43.6	74	43.6	23	strong	0.001	NA	NA	0.001	0.001	0.001	1952-01-01	2011-01-01	56	56	aerial photography (transect) averaged	1.591	3.325	0.881	7.349	10.564	1.737	18.2528	3.25	12.722	6.878	796	25.9	10.9917	11.2
Evolution du trait de côte (histogrammes)	2016-01-29	MEEM	NA	Meem	NA	cerema_0559	NA	atlantic	Europe	France	1200	granite	FALSE	FALSE	FALSE	FALSE	NA	NA	NA	24.9	61	24.9	86	strong	0.001	NA	NA	0.001	0.001	0.001	1952-01-01	2011-01-01	56	56	aerial photography (transect) averaged	1.591	3.325	0.881	7.349	10.564	1.737	18.2528	3.25	12.722	5.776	754	15.7	11.225	10.2
Evolution du trait de côte (histogrammes)	2016-01-29	MEEM	NA	Meem	NA	cerema_0560	NA	atlantic	Europe	France	400	metamorphic	FALSE	FALSE	FALSE	FALSE	NA	NA	NA	11.6	24	11.6	249	strong	0.001	NA	NA	0.001	0.001	0.001	1952-01-01	2011-01-01	56	56	aerial photography (transect) averaged	1.591	3.325	0.881	7.349	10.564	1.737	18.2528	3.25	12.722	7.643	762	27.2	11.0333	11.6
Evolution du trait de côte (histogrammes)	2016-01-29	MEEM	NA	Meem	NA	cerema_0561	mediterranean	NA	Europe	France	800	schist	FALSE	FALSE	FALSE	FALSE	NA	NA	NA	10.1	20	10.1	120	strong	0.0095	NA	NA	0.001	0.035	0.0095	1952-01-01	2011-01-01	87.21	87.21	aerial photography (transect) averaged	1.054	2.707	0.803	4.882	7.108	1.271	5.32159	2.25	18.709	0.162	587	12.5	14.4833	14.8
Evolution du trait de côte (histogrammes)	2016-01-29	MEEM	NA	Meem	NA	cerema_0562	NA	atlantic	Europe	France	200	metamorphic	FALSE	FALSE	FALSE	FALSE	NA	NA	NA	18.9	31	18.9	310	strong	0.001	NA	NA	0.001	0.001	0.001	1952-01-01	2011-01-01	56	56	aerial photography (transect) averaged	1.591	3.325	0.881	7.349	10.564	1.737	18.2528	3.25	12.722	7.643	762	27.2	11.0333	11.6
Evolution du trait de côte (histogrammes)	2016-01-29	MEEM	NA	Meem	NA	cerema_0563	NA	atlantic	Europe	France	400	metamorphic	FALSE	FALSE	FALSE	FALSE	NA	NA	NA	14.9	31	14.9	18	strong	0.001	NA	NA	0.001	0.001	0.001	1952-01-01	2011-01-01	56	56	aerial photography (transect) averaged	1.591	3.325	0.881	7.349	10.564	1.737	18.2528	3.25	12.722	7.643	762	27.2	11.0333	11.6
Evolution du trait de côte (histogrammes)	2016-01-29	MEEM	NA	Meem	NA	cerema_0564	NA	atlantic	Europe	France	600	metamorphic	FALSE	FALSE	FALSE	FALSE	NA	NA	NA	18.7	36	18.7	234	strong	0.001	NA	NA	0.001	0.001	0.001	1952-01-01	2011-01-01	56	56	aerial photography (transect) averaged	1.591	3.325	0.881	7.349	10.564	1.737	18.2528	3.25	12.722	7.569	762	27.2	11.0333	11.6
Evolution du trait de côte (histogrammes)	2016-01-29	MEEM	NA	Meem	NA	cerema_0565	NA	atlantic	Europe	France	400	aeolianite	FALSE	FALSE	FALSE	FALSE	NA	NA	NA	37.5	51	37.5	277	weak	0.001	NA	NA	0.001	0.001	0.001	1952-01-01	2011-01-01	56	56	aerial photography (transect) averaged	1.591	3.325	0.881	7.349	10.564	1.737	18.2528	3.25	12.722	7.569	762	27.2	11.0333	11.6
Evolution du trait de côte (histogrammes)	2016-01-29	MEEM	NA	Meem	NA	cerema_0566	NA	atlantic	Europe	France	400	aeolianite	FALSE	FALSE	FALSE	FALSE	NA	NA	NA	37.2	53	37.2	14	weak	0.001	NA	NA	0.001	0.001	0.001	1952-01-01	2011-01-01	56	56	aerial photography (transect) averaged	1.591	3.325	0.881	7.349	10.564	1.737	18.2528	3.25	12.722	7.569	762	27.2	11.0333	11.6
Evolution du trait de côte (histogrammes)	2016-01-29	MEEM	NA	Meem	NA	cerema_0567	NA	atlantic	Europe	France	1800	volcano-sedimentary	FALSE	FALSE	FALSE	FALSE	NA	NA	NA	34.1	65	34.1	55	strong	0.001	NA	NA	0.001	0.001	0.001	1952-01-01	2011-01-01	56	56	aerial photography (transect) averaged	1.591	3.325	0.881	7.349	10.564	1.737	18.2528	3.25	12.722	7.569	762	27.2	11.0333	11.6
Evolution du trait de côte (histogrammes)	2016-01-29	MEEM	NA	Meem	NA	cerema_0568	NA	atlantic	Europe	France	1800	volcano-sedimentary	FALSE	FALSE	FALSE	FALSE	NA	NA	NA	39.9	59	39.9	353	strong	0.001	NA	NA	0.001	0.001	0.001	1952-01-01	2011-01-01	56	56	aerial photography (transect) averaged	1.591	3.325	0.881	7.349	10.564	1.737	18.2528	3.25	12.722	7.569	762	27.2	11.0333	11.6
Evolution du trait de côte (histogrammes)	2016-01-29	MEEM	NA	Meem	NA	cerema_0569	NA	atlantic	Europe	France	5000	gneiss	FALSE	FALSE	FALSE	FALSE	NA	NA	NA	39.5	73	39.5	30	strong	0.001	NA	NA	0.001	0.001	0.001	1952-01-01	2011-01-01	56	56	aerial photography (transect) averaged	1.591	3.325	0.881	7.349	10.564	1.737	18.2528	3.25	12.722	7.569	762	27.2	11.0333	11.6
Evolution du trait de côte (histogrammes)	2016-01-29	MEEM	NA	Meem	NA	cerema_0570	NA	atlantic	Europe	France	7200	sandstone	FALSE	FALSE	FALSE	FALSE	NA	NA	NA	35.3	70	35.3	252	strong	0.001	NA	NA	0.001	0.001	0.001	1952-01-01	2011-01-01	56	56	aerial photography (transect) averaged	1.591	3.325	0.881	7.349	10.564	1.737	18.2528	3.25	12.722	7.569	762	27.2	11.0333	11.6
Evolution du trait de côte (histogrammes)	2016-01-29	MEEM	NA	Meem	NA	cerema_0571	NA	atlantic	Europe	France	1800	sandstone	FALSE	FALSE	FALSE	FALSE	NA	NA	NA	25.6	55	25.6	244	strong	0.001	NA	NA	0.001	0.001	0.001	1952-01-01	2011-01-01	56	56	aerial photography (transect) averaged	1.591	3.325	0.881	7.349	10.564	1.737	18.2528	3.25	12.722	7.239	762	27.2	11.0333	11.6
Evolution du trait de côte (histogrammes)	2016-01-29	MEEM	NA	Meem	NA	cerema_0572	mediterranean	NA	Europe	France	1000	schist	FALSE	FALSE	FALSE	FALSE	NA	NA	NA	11.8	26	11.8	170	strong	0.044	NA	NA	0.001	0.216	0.044	1952-01-01	2011-01-01	87.21	87.21	aerial photography (transect) averaged	1.054	2.707	0.803	4.882	7.108	1.271	5.32159	2.25	18.709	0.162	587	12.5	14.4833	14.8
Evolution du trait de côte (histogrammes)	2016-01-29	MEEM	NA	Meem	NA	cerema_0573	NA	atlantic	Europe	France	1200	volcanic rock	FALSE	FALSE	FALSE	FALSE	NA	NA	NA	19.8	48	19.8	235	strong	0.001	NA	NA	0.001	0.001	0.001	1952-01-01	2011-01-01	56	56	aerial photography (transect) averaged	1.591	3.325	0.881	7.349	10.564	1.737	18.2528	3.25	12.722	7.239	762	27.2	11.0333	11.6
Evolution du trait de côte (histogrammes)	2016-01-29	MEEM	NA	Meem	NA	cerema_0574	NA	atlantic	Europe	France	7800	gneiss	FALSE	FALSE	FALSE	FALSE	NA	NA	NA	32.1	65	32.1	232	strong	0.001	NA	NA	0.001	0.001	0.001	1952-01-01	2011-01-01	56	56	aerial photography (transect) averaged	1.591	3.325	0.881	7.349	10.564	1.737	18.2528	3.25	12.722	7.158	796	25.9	10.9917	11.2
Evolution du trait de côte (histogrammes)	2016-01-29	MEEM	NA	Meem	NA	cerema_0575	NA	atlantic	Europe	France	600	metamorphic	FALSE	FALSE	FALSE	FALSE	NA	NA	NA	6.4	13	6.4	185	strong	0.001	NA	NA	0.001	0.001	0.001	1952-01-01	2011-01-01	57	57	aerial photography (transect) averaged	2.038	4.227	1.105	8.3	11.538	1.827	33.8258	4	9.782	4.848	891	16.9	11.325	9.8
Evolution du trait de côte (histogrammes)	2016-01-29	MEEM	NA	Meem	NA	cerema_0576	NA	atlantic	Europe	France	600	granite	FALSE	FALSE	FALSE	FALSE	NA	NA	NA	3.9	11	3.9	142	strong	0.0346667	NA	NA	0.001	0.102	0.0346667	1952-01-01	2011-01-01	57	57	aerial photography (transect) averaged	2.038	4.227	1.105	8.3	11.538	1.827	33.8258	4	9.782	4.398	864	14.6	11.4833	9.7
Evolution du trait de côte (histogrammes)	2016-01-29	MEEM	NA	Meem	NA	cerema_0577	NA	atlantic	Europe	France	2000	granite	FALSE	FALSE	FALSE	FALSE	NA	NA	NA	7.3	23	7.3	146	strong	0.0156	NA	NA	0.001	0.121	0.0156	1952-01-01	2011-01-01	57	57	aerial photography (transect) averaged	2.038	4.227	1.105	8.3	11.538	1.827	33.8258	4	9.782	4.398	864	14.6	11.4833	9.7
Evolution du trait de côte (histogrammes)	2016-01-29	MEEM	NA	Meem	NA	cerema_0578	NA	atlantic	Europe	France	200	granite	FALSE	FALSE	FALSE	FALSE	NA	NA	NA	1.5	2	1.5	147	strong	0.001	NA	NA	0.001	0.001	0.001	1952-01-01	2011-01-01	57	57	aerial photography (transect) averaged	2.038	4.227	1.105	8.3	11.538	1.827	33.8258	4	9.782	4.398	864	14.6	11.4833	9.7
Evolution du trait de côte (histogrammes)	2016-01-29	MEEM	NA	Meem	NA	cerema_0579	NA	atlantic	Europe	France	200	volcanic rock	FALSE	FALSE	FALSE	FALSE	NA	NA	NA	3.3	7	3.3	4	strong	0.001	NA	NA	0.001	0.001	0.001	1952-01-01	2011-01-01	56	56	aerial photography (transect) averaged	1.591	3.325	0.881	7.349	10.564	1.737	18.2528	3.25	12.722	6.359	714	19.5	11.1417	10.5
Evolution du trait de côte (histogrammes)	2016-01-29	MEEM	NA	Meem	NA	cerema_0580	mediterranean	NA	Europe	France	2000	limestone	FALSE	FALSE	FALSE	FALSE	NA	NA	NA	40.4	118	40.4	120	strong	0.001	NA	NA	0.001	0.001	0.001	1952-01-01	2011-01-01	87.21	87.21	aerial photography (transect) averaged	0.904	2.313	0.692	4.787	6.921	1.249	3.83851	2.25	19.163	0.192	701	27.1	12.8167	14.9
Evolution du trait de côte (histogrammes)	2016-01-29	MEEM	NA	Meem	NA	cerema_0581	mediterranean	NA	Europe	France	2000	limestone	FALSE	FALSE	FALSE	FALSE	NA	NA	NA	80.7	169	80.7	118	strong	0.001	NA	NA	0.001	0.001	0.001	1952-01-01	2011-01-01	87.21	87.21	aerial photography (transect) averaged	0.904	2.313	0.692	4.787	6.921	1.249	3.83851	2.25	19.163	0.192	701	27.1	12.8167	14.9
Evolution du trait de côte (histogrammes)	2016-01-29	MEEM	NA	Meem	NA	cerema_0582	mediterranean	NA	Europe	France	200	fluvial deposits	FALSE	FALSE	FALSE	FALSE	NA	NA	NA	5.2	14	5.2	174	weak	0.001	NA	NA	0.001	0.001	0.001	1952-01-01	2011-01-01	87.21	87.21	aerial photography (transect) averaged	1.054	2.707	0.803	4.882	7.108	1.271	5.32159	2.25	18.709	0.162	587	12.5	14.4833	14.8
Evolution du trait de côte (histogrammes)	2016-01-29	MEEM	NA	Meem	NA	cerema_0583	NA	atlantic	Europe	France	400	sedimentaires	FALSE	FALSE	FALSE	FALSE	NA	NA	NA	18.1	34	18.1	316	strong	0.001	NA	NA	0.001	0.001	0.001	1952-01-01	2011-01-01	56	56	aerial photography (transect) averaged	1.591	3.325	0.881	7.349	10.564	1.737	18.2528	3.25	12.722	7.158	796	25.9	10.9917	11.2
Evolution du trait de côte (histogrammes)	2016-01-29	MEEM	NA	Meem	NA	cerema_0584	NA	atlantic	Europe	France	3000	sedimentaires	FALSE	FALSE	FALSE	FALSE	NA	NA	NA	24.5	46	24.5	245	strong	0.001	NA	NA	0.001	0.001	0.001	1952-01-01	2011-01-01	56	56	aerial photography (transect) averaged	1.591	3.325	0.881	7.349	10.564	1.737	18.2528	3.25	12.722	7.158	796	25.9	10.9917	11.2
Evolution du trait de côte (histogrammes)	2016-01-29	MEEM	NA	Meem	NA	cerema_0585	NA	atlantic	Europe	France	800	sandstone	FALSE	FALSE	FALSE	FALSE	NA	NA	NA	14.2	21	14.2	170	strong	0.001	NA	NA	0.001	0.001	0.001	1952-01-01	2011-01-01	56	56	aerial photography (transect) averaged	1.591	3.325	0.881	7.349	10.564	1.737	18.2528	3.25	12.722	7.158	796	25.9	10.9917	11.2
Evolution du trait de côte (histogrammes)	2016-01-29	MEEM	NA	Meem	NA	cerema_0586	NA	atlantic	Europe	France	200	sandstone	FALSE	FALSE	FALSE	FALSE	NA	NA	NA	14.2	21	14.2	154	strong	0.001	NA	NA	0.001	0.001	0.001	1952-01-01	2011-01-01	56	56	aerial photography (transect) averaged	1.591	3.325	0.881	7.349	10.564	1.737	18.2528	3.25	12.722	7.158	796	25.9	10.9917	11.2
Evolution du trait de côte (histogrammes)	2016-01-29	MEEM	NA	Meem	NA	cerema_0587	NA	atlantic	Europe	France	400	granite	FALSE	FALSE	FALSE	FALSE	NA	NA	NA	15.8	33	15.8	226	strong	0.001	NA	NA	0.001	0.001	0.001	1952-01-01	2011-01-01	56	56	aerial photography (transect) averaged	1.591	3.325	0.881	7.349	10.564	1.737	18.2528	3.25	12.722	5.776	754	15.7	11.225	10.2
Evolution du trait de côte (histogrammes)	2016-01-29	MEEM	NA	Meem	NA	cerema_0588	NA	atlantic	Europe	France	1600	granite	FALSE	FALSE	FALSE	FALSE	NA	NA	NA	4.5	14	4.5	253	strong	0.055625	NA	NA	0.001	0.438	0.055625	1952-01-01	2011-01-01	56	56	aerial photography (transect) averaged	1.591	3.325	0.881	7.349	10.564	1.737	18.2528	3.25	12.722	5.776	754	15.7	11.225	10.2
Evolution du trait de côte (histogrammes)	2016-01-29	MEEM	NA	Meem	NA	cerema_0589	NA	atlantic	Europe	France	200	granite	FALSE	FALSE	FALSE	FALSE	NA	NA	NA	6.6	14	6.6	62	strong	0.202	NA	NA	0.202	0.202	0.202	1952-01-01	2011-01-01	57	57	aerial photography (transect) averaged	2.038	4.227	1.105	8.3	11.538	1.827	33.8258	4	9.782	5.126	874	18.2	11.1167	10.1
Evolution du trait de côte (histogrammes)	2016-01-29	MEEM	NA	Meem	NA	cerema_0590	NA	atlantic	Europe	France	1800	metamorphic	FALSE	FALSE	FALSE	FALSE	NA	NA	NA	25.9	54	25.9	263	strong	0.001	NA	NA	0.001	0.001	0.001	1952-01-01	2011-01-01	57	57	aerial photography (transect) averaged	2.038	4.227	1.105	8.3	11.538	1.827	33.8258	4	9.782	4.848	874	18.2	11.1167	10.1
Evolution du trait de côte (histogrammes)	2016-01-29	MEEM	NA	Meem	NA	cerema_0591	NA	atlantic	Europe	France	400	granite	FALSE	FALSE	FALSE	FALSE	NA	NA	NA	6.4	12	6.4	127	strong	0.001	NA	NA	0.001	0.001	0.001	1952-01-01	2011-01-01	59	59	aerial photography (transect) averaged	1.835	3.876	1.016	8.452	11.616	1.825	27.925	4.25	9.622	3.141	765	11.2	11.7	10.4
[truncated: 733 more rows]
